# Supplementary material for: Molecular signature of the ontogenic development of the prawn Macrobrachium tenellum
Source: PeerJ journal article supplement (doi:10.7717/peerj.16344), 2023-11-07
Supplement: Proteins.xlsx [file Proteins.xlsx]

## Sheet: 201709_S4_Proteins
Checked	Protein FDR Confidence	Master	Accession	Description	Exp. q-value	Sum PEP Score	Coverage	# Peptides	# PSMs	# Unique Peptides	# Protein Groups	# AAs	MW [kDa]	calc. pI	Modifications	Area: Sample 14	Area: Sample 12	Area: Sample 7	Area: Sample 3	Area: Sample 2	Area: Sample 1	emPAI	Score Sequest HT	# Peptides Sequest HT
FALSE	High	IsMasterProtein	Q95P34	Vitellogenin OS=Macrobrachium rosenbergii GN=Macr-Vg PE=2 SV=1	0	1903.96	49.7438	173	4942	71	1	2537	285.48	8.95		270000000000	110000000000	2300000000	5100000000	33000000000	210000000000	89.852	14270.1	173
FALSE	High	IsMasterProtein	A0A0E3JBN6	Vitellogenin OS=Macrobrachium nipponense PE=2 SV=1	0	1883.74	49.0142	157	4767	55	1	2536	286.626	8.92		170000000000	80000000000	1500000000	2800000000	20000000000	120000000000	76.668	14829.9	157
FALSE	High	IsMasterProtein	F5CEX2	Hemocyanin OS=Macrobrachium nipponense PE=2 SV=1	0	305.843	34.0875	24	548	14	1	663	76.602	5.77		1200000000	1100000000	1200000000	1900000000	13000000000	3100000000	25.367	1357.99	24
FALSE	High	IsMasterProtein	Q6S4R6	Heat shock protein 70 OS=Macrobrachium rosenbergii PE=2 SV=1	0	242.128	47.7658	32	150	12	1	649	70.861	5.36		160000000	69000000	15000000	14000000	110000000	410000000	15.037	416.184	32
FALSE	High	IsMasterProtein	A0A0A0PM26	Hemocyanin OS=Macrobrachium nipponense PE=2 SV=1	0	239.772	31.3953	20	460	10	1	688	79.11	6		1100000000	490000000	390000000	570000000	2700000000	590000000	16.783	1068.84	20
FALSE	High	IsMasterProtein	A0A0A6ZEG8	Heat shock protein 70 OS=Macrobrachium nipponense PE=2 SV=1	0	198.661	44.376	27	136	7	1	649	71.123	5.33		390000000	140000000	28000000	28000000	120000000	750000000	7.886	365.204	27
FALSE	High	IsMasterProtein	M4IQR3	Hemocyanin subunit 1 OS=Macrobrachium nipponense PE=2 SV=1	0	183.497	19.5556	15	291	14	1	675	78.012	5.67		990000000	460000000	640000000	1000000000	7100000000	2000000000	6.263	771.925	15
FALSE	High	IsMasterProtein	Q58ZF3	Beta-actin OS=Macrobrachium rosenbergii PE=2 SV=1	0	180.11	56.117	19	187	9	1	376	41.841	5.48		370000000	690000000	510000000	800000000	2200000000	3100000000	29.079	510.068	19
FALSE	High	IsMasterProtein	K9J9V3	DEAD(Asp-Glu-Ala-Asp) box polypeptide 39 OS=Macrobrachium nipponense GN=DDX39 PE=2 SV=1	0	134.563	38.8889	16	118	16	1	432	48.979	5.5		4300000000	110000000	400000000	290000000	970000000	1200000000	9	289.82	16
FALSE	High	IsMasterProtein	A0A142G5I9	Cathepsin-D OS=Macrobrachium rosenbergii GN=CAT-D PE=2 SV=1	0	129.345	33.7662	10	54	10	1	385	42.074	6.79		790000000	210000000	7000000	9100000	170000000	1400000000	9	191.145	10
FALSE	High	IsMasterProtein	E2JE77	Arginine kinase 1 OS=Macrobrachium rosenbergii GN=AK1 PE=2 SV=1	0	128.01	42.2535	15	105	15	1	355	39.489	6.64		130000000	99000000	160000000	190000000	750000000	530000000	15.876	272.614	15
FALSE	High	IsMasterProtein	A0A088BEN6	Glyceraldehyde-3-phosphate dehydrogenase (Fragment) OS=Macrobrachium rosenbergii PE=2 SV=1	0	114.081	82.9457	7	32	7	1	129	13.628	6.9		77000000	24000000		5300000	110000000	190000000	55.234	121.995	7
FALSE	High	IsMasterProtein	A0A140AZ38	Pyruvate kinase OS=Macrobrachium nipponense PE=2 SV=1	0	110.075	41.8251	21	67	21	1	526	57.473	7.24		130000000	28000000	7500000	12000000	110000000	190000000	3.549	163.622	21
FALSE	High	IsMasterProtein	W6E8R7	Slow-tonic S2 tropomyosin OS=Macrobrachium nipponense PE=2 SV=1	0	92.8972	49.2958	19	79	2	1	284	32.88	4.74				4200000	7700000	20000000		16.783	189.015	19
FALSE	High	IsMasterProtein	D3XNR9	Tropomyosin OS=Macrobrachium rosenbergii PE=2 SV=1	0	92.4669	47.1831	18	82	1	1	284	32.826	4.77				32000000	27000000	610000000		12.895	207.143	18
FALSE	High	IsMasterProtein	A0A0A6Z676	Actin (Fragment) OS=Macrobrachium rosenbergii PE=2 SV=1	0	92.0399	51.938	11	96	1	1	258	29.059	5.1					3800000			12.335	248.172	11
FALSE	High	IsMasterProtein	J9PNK3	Chaperonin OS=Macrobrachium rosenbergii PE=2 SV=1	0	75.8876	32.3529	16	44	16	1	544	59.654	6.62			14000000	12000000	47000000	180000000	120000000	2.065	81.2105	16
FALSE	High	IsMasterProtein	A0A088BES7	Elongation factor 1-alpha (Fragment) OS=Macrobrachium rosenbergii PE=2 SV=1	0	72.8613	48.2213	10	71	5	1	253	28.029	7.96		780000000	410000000	73000000	67000000	340000000	2700000000	7.577	198.971	10
FALSE	High	IsMasterProtein	A0A142G5I8	Adenine nucleotide translocase OS=Macrobrachium rosenbergii GN=ANT PE=2 SV=1	0	68.7335	43.9739	17	66	17	1	307	33.419	9.74				87000000	140000000	610000000	890000000	9	126.047	17
FALSE	High	IsMasterProtein	E5DHS2	Heat shock protein 90 OS=Macrobrachium nipponense PE=2 SV=1	0	66.7688	18.9891	15	62	11	1	732	84.282	4.94		13000000	30000000	17000000	23000000	120000000	440000000	1.907	136.976	15
FALSE	High	IsMasterProtein	G0Z048	Cytosolic manganese superoxide dismutase OS=Macrobrachium nipponense PE=2 SV=1	0	63.0748	27.6224	8	27	8	1	286	31.197	6.13		160000000	67000000	50000000	41000000	250000000	280000000	5.105	94.3045	8
FALSE	High	IsMasterProtein	A0A168SIW1	Nucleoside diphosphate kinase OS=Macrobrachium nipponense PE=2 SV=1	0	60.5975	42.9379	6	51	1	1	177	19.804	7.85		100000000	13000000			63000000	280000000	7.111	168.15	6
FALSE	High	IsMasterProtein	A0A0S1Z3D5	Sodium-potassium adenosine triphosphatase (Fragment) OS=Macrobrachium acanthurus PE=2 SV=1	0	58.6549	52.0179	11	27	11	1	223	24.909	5.1				28000000	44000000	67000000	13000000	5.494	67.1833	11
FALSE	High	IsMasterProtein	A0A0B4L994	Peroxiredoxin OS=Macrobrachium nipponense PE=2 SV=1	0	57.477	38.3838	8	45	8	1	198	22.117	4.96		280000000	98000000	82000000	120000000	480000000	860000000	6.197	105.201	8
FALSE	High	IsMasterProtein	A0A0U1W4T3	Putative clotting protein OS=Macrobrachium rosenbergii PE=2 SV=1	0	55.3456	7.53505	12	24	12	1	1712	192.431	5.73		22000000		3600000	6500000	33000000		0.425	63.3318	12
FALSE	High	IsMasterProtein	A0A0A7AD33	HSP60 OS=Macrobrachium nipponense PE=2 SV=1	0	54.1881	24.4792	12	26	2	1	576	60.962	5.45						21000000	180000000	1.477	58.1521	12
FALSE	High	IsMasterProtein	A0A0D6DQV4	Histone H4 OS=Macrobrachium rosenbergii GN=H4 PE=2 SV=1	0	47.8804	51.4563	6	56	6	1	103	11.374	11.36		450000000	110000000	83000000	140000000	1900000000	1200000000	45.416	158.307	6
FALSE	High	IsMasterProtein	A0A0F7RQ78	Heat shock protein 90 OS=Macrobrachium rosenbergii GN=hsp90 PE=2 SV=1	0	44.2219	29.7297	10	37	6	1	333	38.049	4.84				5700000	6200000	30000000		2.728	78.8168	10
FALSE	High	IsMasterProtein	I1SSS7	Cathepsin L OS=Macrobrachium nipponense PE=2 SV=1	0	43.8056	25.4386	6	30	6	1	342	37.673	5.44		240000000	220000000	13000000		66000000	2600000000	1.637	92.355	6
FALSE	High	IsMasterProtein	A0A0F7RQU4	Heat shock protein 60 OS=Macrobrachium rosenbergii GN=hsp60 PE=2 SV=1	0	39.7782	21.2544	12	29	2	1	574	60.71	5.6				21000000	20000000	35000000	32000000	1.477	51.2246	12
FALSE	High	IsMasterProtein	A0A172Q3Z0	GTP-binding nuclear protein OS=Macrobrachium rosenbergii GN=ran PE=2 SV=1	0	39.459	37.2093	8	28	8	1	215	24.548	7.11		35000000	38000000	26000000	47000000	250000000	530000000	5.579	68.14	8
FALSE	High	IsMasterProtein	A0T1M1	Alpha-2-macroglobulin OS=Macrobrachium rosenbergii PE=2 SV=1	0	39.1134	7.33696	13	18	8	1	1472	163.185	5.07				4200000	5900000	33000000		0.434	28.2335	13
FALSE	High	IsMasterProtein	A0A0B4UBV8	Rab1A OS=Macrobrachium rosenbergii PE=2 SV=1	0	38.4636	43.6893	9	28	7	1	206	22.608	5.66		27000000	22000000	8200000	10000000	36000000	120000000	2.875	61.1182	9
FALSE	High	IsMasterProtein	A0A193CGZ5	ATP-dependent 6-phosphofructokinase OS=Macrobrachium nipponense PE=2 SV=1	0	38.2882	9.34292	10	15	10	1	974	108.111	6.15				5000000	6500000	24000000		0.613	29.778	10
FALSE	High	IsMasterProtein	R9WWY0	Nucleoside diphosphate kinase OS=Macrobrachium rosenbergii PE=2 SV=1	0	37.5923	37.8531	6	53	1	1	177	19.799	7.8		480000000	260000000	14000000	27000000	350000000	710000000	4.337	135.837	6
FALSE	High	IsMasterProtein	A0A126TKR7	Elongation factor 1 alpha (Fragment) OS=Macrobrachium amazonicum PE=2 SV=1	0	36.8492	50.4065	6	39	1	1	123	14.097	8.56		110000000	5400000			7400000		9	86.5655	6
FALSE	High	IsMasterProtein	A0A140AZ39	Pyruvate carboxylase subunit B (Fragment) OS=Macrobrachium nipponense PE=2 SV=1	0	32.4215	10.1639	9	12	9	1	915	100.054	7.18					3200000	18000000	75000000	0.448	28.8201	9
FALSE	High	IsMasterProtein	G4XX74	PL10-like protein OS=Macrobrachium nipponense PE=2 SV=1	0	32.3438	11.7066	8	14	7	1	709	78.627	9.03				3500000		12000000	52000000	0.48	37.5085	8
FALSE	High	IsMasterProtein	I1SSS8	Cathepsin B OS=Macrobrachium nipponense PE=2 SV=1	0	31.1028	10.574	2	7	2	1	331	36.516	6.84		78000000					310000000	0.778	31.4187	2
FALSE	High	IsMasterProtein	R4JXM8	Enolase (Fragment) OS=Macrobrachium nipponense PE=4 SV=1	0	30.3372	28.2609	4	23	4	1	138	15.187	4.65			36000000	60000000	59000000	400000000	130000000	5.31	49.5422	4
FALSE	High	IsMasterProtein	G9BRM2	Apoptosis inhibitor OS=Macrobrachium rosenbergii PE=2 SV=1	0	30.3204	15.7009	9	21	9	1	535	59.798	8.98				24000000	23000000	98000000	130000000	1.054	31.839	9
FALSE	High	IsMasterProtein	B0LSR6	Ferritin OS=Macrobrachium rosenbergii PE=2 SV=1	0	28.5371	29.8246	5	17	5	1	171	19.414	4.97		530000000	120000000	9100000	8100000	58000000	400000000	2.162	53.9876	5
FALSE	High	IsMasterProtein	T1R896	Sex-lethal 1 OS=Macrobrachium nipponense GN=sxl1 PE=2 SV=1	0	26.8907	23.0519	6	8	6	1	308	33.395	8.68		43000000				14000000	95000000	1.371	21.2604	6
FALSE	High	IsMasterProtein	I0B8W2	Alpha2-macroglobulin (Fragment) OS=Macrobrachium nipponense GN=a2-M PE=2 SV=1	0	24.8047	19.4595	7	7	2	1	370	41.394	5.2						17000000		0.905	16.6284	7
FALSE	High	IsMasterProtein	H8XYP6	Catalase OS=Macrobrachium rosenbergii PE=2 SV=1	0	24.5619	12.0155	5	5	5	1	516	58.506	7.06				290000000		11000000		0.45	10.8932	5
FALSE	High	IsMasterProtein	A0A0B4UBA7	Rab5C OS=Macrobrachium rosenbergii PE=2 SV=1	0	22.4132	26.4151	5	14	5	1	212	22.866	8.13			17000000	4600000	8300000	21000000	76000000	1.424	41.4443	5
FALSE	High	IsMasterProtein	H9BC94	Fatty acid binding protein 10 OS=Macrobrachium nipponense PE=2 SV=1	0	22.3689	35.3846	3	7	3	1	130	13.575	8.65				7000000	16000000	150000000		1.371	21.2361	3
FALSE	High	IsMasterProtein	Q58HZ6	Actin (Fragment) OS=Macrobrachium rosenbergii PE=2 SV=1	0	21.8773	28.1553	2	6	2	1	103	11.623	6.16						36000000		3.642	19.9464	2
FALSE	High	IsMasterProtein	H6UXP2	Farnesoic acid O-methyltransferase OS=Macrobrachium nipponense PE=2 SV=1	0	21.8701	14.1818	4	5	4	1	275	31.467	4.82						100000000		1.848	13.4328	4
FALSE	High	IsMasterProtein	D2KK94	Glutamate dehydrogenase (Fragment) OS=Macrobrachium rosenbergii GN=GDH PE=2 SV=1	0	19.4358	40.3361	4	12	4	1	119	13.15	4.74		780000000	300000000	15000000	19000000	55000000	290000000	3.642	30.889	4
FALSE	High	IsMasterProtein	A0A0B4UBW3	Rab10 OS=Macrobrachium rosenbergii PE=2 SV=1	0	19.1695	29.5567	7	17	5	1	203	23.077	8.13				6800000	6500000	13000000		1.929	23.1242	7
FALSE	High	IsMasterProtein	A0A0B4UBB1	Rab11A OS=Macrobrachium rosenbergii PE=2 SV=1	0	18.9493	26.1682	6	17	6	1	214	23.718	5.48		48000000	34000000	3500000	9100000	46000000	130000000	1.683	26.3505	6
FALSE	High	IsMasterProtein	W6FEW7	Acyl-CoA-binding protein OS=Macrobrachium nipponense GN=ACBP PE=2 SV=1	0	17.8581	47.1264	4	23	4	1	87	9.875	5.55			32000000	62000000	77000000	150000000	120000000	6.197	40.2942	4
FALSE	High	IsMasterProtein	I6LTQ0	Mitochondrial prohibitin OS=Macrobrachium rosenbergii PE=2 SV=1	0	16.4766	15.5797	4	8	4	1	276	30.384	6.83				2600000	3000000	7800000	63000000	0.624	18.3874	4
FALSE	High	IsMasterProtein	M9UTQ1	Glutathione S-transferases OS=Macrobrachium nipponense PE=2 SV=1	0	16.437	20.3704	5	21	5	1	216	25.429	5.52		120000000	26000000	28000000	25000000	120000000	210000000	1.054	38.0017	5
FALSE	High	IsMasterProtein	K9JA10	DEAD(Asp-Glu-Ala-Asp) box polypeptide 5 OS=Macrobrachium nipponense GN=DDX5 PE=2 SV=1	0	15.1007	8.7037	5	7	4	1	540	61.098	9.1				2700000	700000	5100000	57000000	0.417	13.8405	5
FALSE	High	IsMasterProtein	A0A0B4UCH1	Rab7A OS=Macrobrachium rosenbergii PE=2 SV=1	0	13.9591	24.878	5	10	5	1	205	23.128	6.34		29000000		4900000	6900000	22000000	84000000	0.896	14.4056	5
FALSE	High	IsMasterProtein	C0M152	Cytochrome c oxidase subunit 2 OS=Macrobrachium lanchesteri GN=COX2 PE=3 SV=1	0	12.902	17.4672	4	6	4	1	229	25.972	5.27				5500000	9900000	32000000		1.783	11.0658	4
FALSE	High	IsMasterProtein	A0A0B4UC52	Rab14 OS=Macrobrachium rosenbergii PE=2 SV=1	0	11.6747	11.6279	2	9	1	1	215	24.113	6.21						3200000		0.359	24.1283	2
FALSE	High	IsMasterProtein	Q3Y596	Superoxide dismutase OS=Macrobrachium rosenbergii PE=2 SV=1	0	10.7808	16.055	3	5	3	1	218	23.842	7.59				3300000	4100000	6600000	46000000	0.874	12.1208	3
FALSE	High	IsMasterProtein	G8H336	Ribosomal protein L10 (Fragment) OS=Macrobrachium acanthurus PE=2 SV=1	0	9.7428	45.7831	4	5	4	1	83	9.496	11.94						15000000	67000000	3.642	8.92517	4
FALSE	High	IsMasterProtein	Q6J1F2	Peroxinectin (Fragment) OS=Macrobrachium rosenbergii PE=2 SV=1	0	9.68712	17.2414	2	2	2	1	145	16.61	7.75						10000000		0.931	3.39714	2
FALSE	High	IsMasterProtein	A0A140AZ37	Malate dehydrogenase OS=Macrobrachium nipponense PE=2 SV=1	0	9.56008	7.35294	3	7	3	1	340	35.284	8.13				56000000	33000000	100000000	310000000	0.389	16.5919	3
FALSE	High	IsMasterProtein	I7BBT8	Cytochrome c oxidase subunit 3 (Fragment) OS=Macrobrachium rosenbergii PE=3 SV=1	0	9.54077	4.16667	1	3	1	1	264	29.906	7.09						46000000	43000000	1.512	8.57747	1
FALSE	High	IsMasterProtein	B8ZXC6	Histone 3 (Fragment) OS=Macrobrachium aff. pilimanus MB-2009 GN=h3 PE=3 SV=1	0	9.43845	20	3	21	3	1	115	12.85	10.65		87000000	19000000	150000000	220000000	800000000	570000000	5.31	44.1744	3
FALSE	High	IsMasterProtein	A0A140AZ43	Glycogen synthase kinase 3 beta OS=Macrobrachium nipponense PE=2 SV=1	0	9.28194	6.28141	2	2	2	1	398	45.16	8.73						7100000	23000000	0.202	5.12746	2
FALSE	High	IsMasterProtein	A4Z4V4	Crustacyanin-like lipocalin OS=Macrobrachium rosenbergii PE=2 SV=1	0	9.03985	9.85222	2	6	2	1	203	23.002	6.76				15000000	22000000	110000000		0.668	15.7802	2
FALSE	High	IsMasterProtein	B8LG57	Male reproductive-related LIM protein OS=Macrobrachium rosenbergii PE=2 SV=1	0	8.40841	18.4783	2	3	2	1	92	10.07	8.72						46000000		2.162	6.80373	2
FALSE	High	IsMasterProtein	A0A0B4UC48	Rab6A OS=Macrobrachium rosenbergii PE=2 SV=1	0	8.1644	10.9005	3	10	2	1	211	23.741	5.8		180000000	97000000	6200000	8800000	220000000	570000000	0.468	20.2967	3
FALSE	High	IsMasterProtein	A0A0D6DQG1	Histone H2A OS=Macrobrachium rosenbergii GN=hist2 PE=2 SV=1	0	7.9969	16.7883	3	14	3	1	137	14.666	10.49				50000000	44000000	690000000		1.371	26.8645	3
FALSE	High	IsMasterProtein	B5A8X6	Putative uncharacterized protein (Fragment) OS=Macrobrachium rosenbergii PE=2 SV=1	0	7.73575	18.4466	2	10	2	1	103	11.772	9.85				4100000	4800000	38000000	83000000	2.162	13.4567	2
FALSE	High	IsMasterProtein	P00031	Cytochrome c OS=Macrobrachium malcolmsonii PE=1 SV=2	0	7.47173	14.2857	1	1	1	1	105	11.554	9.6						12000000		0.334	4.24598	1
FALSE	High	IsMasterProtein	M9MSS8	Mago nashi 1 OS=Macrobrachium nipponense PE=2 SV=1	0	6.82094	12.9252	2	4	2	1	147	17.235	6.11				4300000		23000000		0.425	9.43916	2
FALSE	High	IsMasterProtein	A0A0A8KCJ5	GST-delta OS=Macrobrachium rosenbergii GN=GST-delta PE=2 SV=1	0	6.05129	4.16667	1	11	1	1	216	24.214	6.39		160000000	46000000	9900000	14000000	76000000	200000000	0.425	20.1068	1
FALSE	High	IsMasterProtein	B9W2R6	Glutathione peroxidase OS=Macrobrachium rosenbergii PE=2 SV=1	0	5.2468	5.91398	1	2	1	1	186	21.184	7.83		120000000	5200000					0.212	6.09327	1
FALSE	High	IsMasterProtein	A0A173G7X5	Dorsal OS=Macrobrachium rosenbergii PE=2 SV=1	0	5.10885	1.81543	1	1	1	1	661	72.358	6.34						1800000		0.075	2.56189	1
FALSE	High	IsMasterProtein	A7UL77	Superoxide dismutase [Cu-Zn] OS=Macrobrachium rosenbergii PE=2 SV=1	0	5.00336	10.4478	1	1	1	1	201	20.85	5						11000000		0.778	2.61916	1
FALSE	Medium	IsMasterProtein	Q58HZ8	Prophenoloxidase (Fragment) OS=Macrobrachium rosenbergii PE=2 SV=1	0.0112994	4.31114	1.85714	1	1	1	1	700	79.899	7.3						5800000		0.053	2.69239	1
FALSE	Medium	IsMasterProtein	I1VWN9	Ribosomal protein L26 OS=Macrobrachium rosenbergii GN=RPL26 PE=2 SV=1	0.0112994	4.16101	6.25	1	3	1	1	144	16.692	10.86				3300000	4300000	8800000		0.585	7.3597	1
FALSE	Medium	IsMasterProtein	A0A168SIY7	Ribosomal protein L24 OS=Macrobrachium nipponense PE=2 SV=1	0.0112994	3.86707	8.64198	2	3	2	1	162	18.458	11.22						34000000	66000000	0.668	6.32808	2
FALSE	Medium	IsMasterProtein	A0A0M5DID3	Histone 1 OS=Macrobrachium rosenbergii GN=his1 PE=2 SV=1	0.0112994	3.68532	12.2951	2	10	2	1	122	12.609	10.3				23000000	35000000	240000000		1.154	11.7561	2
FALSE	Medium	IsMasterProtein	A0A0F7RQZ9	Glutathione S-transferase kappa OS=Macrobrachium rosenbergii GN=gstk PE=2 SV=1	0.0112994	3.56719	4.42478	1	3	1	1	226	25.448	8.92				8600000	5900000	16000000		0.166	4.66719	1
FALSE	Medium	IsMasterProtein	A0A0U2DYD0	Cytochrome b OS=Macrobrachium bullatum GN=cytb PE=3 SV=1	0.0112994	3.22944	2.38095	1	1	1	1	378	42.506	7.99						18000000		0.389	2.17904	1
FALSE	Medium	IsMasterProtein	W0LYS5	Calcium-calmodulin dependent protein kinase I OS=Macrobrachium nipponense GN=CaMKI PE=2 SV=1	0.0112994	2.89894	3.18841	1	1	1	1	345	39.218	6.28						8300000		0.145	2.35309	1
FALSE	Medium	IsMasterProtein	M9MSS7	RNA-binding protein 8A OS=Macrobrachium nipponense PE=2 SV=1	0.0112994	2.78941	6.8323	1	1	1	1	161	18.464	4.89						4300000		0.334	2.3516	1
FALSE	Medium	IsMasterProtein	I3UJK1	Cyclin-dependent kinases 2 OS=Macrobrachium rosenbergii GN=CDK2 PE=2 SV=1	0.0112994	2.67716	2.62295	1	2	1	1	305	35.076	8.15						15000000		0.116	3.80021	1
FALSE	Medium	IsMasterProtein	D4N5G6	SUMO-conjugating enzyme OS=Macrobrachium nipponense GN=Ubc9 PE=2 SV=1	0.0112994	2.6347	6.25	1	3	1	1	160	18.31	8.41		24000000				39000000	110000000	0.259	6.33721	1
FALSE	Medium	IsMasterProtein	A0A0B4UCH7	Rab18 OS=Macrobrachium rosenbergii PE=2 SV=1	0.0112994	2.55186	7.76699	2	3	2	1	206	23.091	5.01					690000	20000000		0.359	1.73971	2
FALSE	Medium	IsMasterProtein	A0A0E3JBQ2	Vitellogenin receptor OS=Macrobrachium nipponense PE=2 SV=1	0.0112994	2.19579	0.368034	1	2	1	1	1902	209.508	5.62			13000000				12000000	0.022	4.32248	1
FALSE	Medium	IsMasterProtein	G0YP40	Macrobrachium nipponense hyperglycemic hormone protein OS=Macrobrachium nipponense GN=CHH PE=2 SV=1	0.0112994	2.01211	5.92593	1	1	1	1	135	15.146	8.25				4000000				0.334	0	1
FALSE	Medium	IsMasterProtein	A0A0H3WF09	Juvenile hormone epoxide hydrolase OS=Macrobrachium rosenbergii GN=JHEH PE=2 SV=1	0.0162162	1.79778	1.52174	1	1	1	1	460	51.253	8.16							51000000	0.11	1.68478	1
FALSE	Medium	IsMasterProtein	G8Z9Y7	Vitellogenin receptor OS=Macrobrachium rosenbergii PE=2 SV=1	0.0162162	1.76853	0.423504	1	2	1	1	1889	208.137	5.57				18000000	20000000			0.021	4.05748	1
FALSE	Medium	IsMasterProtein	V9PNQ4	Retinoid X receptor OS=Macrobrachium nipponense GN=RXR-L PE=2 SV=1	0.0162162	1.74642	1.55902	1	1	1	1	449	49.317	7.14						11000000		0.105	1.72587	1
FALSE	Medium	IsMasterProtein	A0A173GTS1	VLIG2 OS=Macrobrachium rosenbergii PE=2 SV=1	0.0162162	1.72423	0.364964	1	2	1	1	1918	221.452	6.79					20000000	88000000		0.02	1.71393	1
FALSE	Medium	IsMasterProtein	A0A0U2DW78	ATP synthase subunit a OS=Macrobrachium bullatum GN=atp6 PE=4 SV=1	0.0162162	1.69702	6.25	1	1	1	1	224	24.648	8.59						2100000		1.154	2.02896	1
FALSE	Medium	IsMasterProtein	W8PFL4	Chitinase 3C OS=Macrobrachium nipponense PE=2 SV=1	0.026738	1.58303	2.91667	1	2	1	1	480	54.002	5.1							300000000	0.122	0	1
FALSE	Medium	IsMasterProtein	A0A173GTR2	VLIG1 OS=Macrobrachium rosenbergii PE=2 SV=1	0.0319149	1.44928	0.330761	1	7	1	1	1814	208.736	5.95		110000000	71000000	4600000	6300000	12000000	770000000	0.019	7.05074	1
FALSE	Medium	IsMasterProtein	C7EYW3	Vacuolar H+-ATPase (Fragment) OS=Macrobrachium amazonicum PE=2 SV=1	0.0364583	1.41646	5.12821	1	3	1	1	117	13.232	5.03				3700000	10000000			0.389	1.72861	1
FALSE	Medium	IsMasterProtein	W8PC51	Chitinase 4 OS=Macrobrachium nipponense PE=2 SV=1	0.0364583	1.27687	1.2945	1	1	1	1	618	68.686	4.72				2900000				0.129	0	1
