# Supplementary material for: Molecular signature of the ontogenic development of the prawn Macrobrachium tenellum
Source: PeerJ journal article supplement (doi:10.7717/peerj.16344), 2023-11-07
Supplement: Secuencias_de_proteinas_macrobrachium.xlsx [file Secuencias_de_proteinas_macrobrachium.xlsx]

## Sheet: Sheet1
!DB	DB_Object_ID	DB_Object_Symbol	Qualifier	GO_ID	DB_Reference	Evidence_Code	With_From	Aspect	DB_Object_Name	DB_Object_Synonym	DB_Object_Type	Taxon	Date	Assigned_By	Annotation_Extension	Gene_Product_Form_ID
UniProtKB	A0A059PBP6	A0A059PBP6		GO:0004553	GO_REF:0000002	IEA	InterPro:IPR000757	F	Lipopolysaccharide and beta-1,3-glucan binding protein		protein	taxon:159736	20180714	InterPro	Macrobrachium malcolmsoni
UniProtKB	A0A059PBP6	A0A059PBP6		GO:0005975	GO_REF:0000002	IEA	InterPro:IPR000757	P	Lipopolysaccharide and beta-1,3-glucan binding protein		protein	taxon:159736	20180714	InterPro	Macrobrachium malcolmsoni
UniProtKB	A0A075C4I1	COI		GO:0004129	GO_REF:0000002	IEA	InterPro:IPR000883|InterPro:IPR023616	F	Cytochrome c oxidase subunit 1	COI	protein	taxon:159736	20180714	InterPro	Macrobrachium malcolmsoni
UniProtKB	A0A075C4I1	COI		GO:0004129	GO_REF:0000003	IEA	EC:1.9.3.1	F	Cytochrome c oxidase subunit 1	COI	protein	taxon:159736	20180714	UniProt	Macrobrachium malcolmsoni
UniProtKB	A0A075C4I1	COI		GO:0005739	GO_REF:0000038	IEA	UniProtKB-KW:KW-0496	C	Cytochrome c oxidase subunit 1	COI	protein	taxon:159736	20180714	UniProt	Macrobrachium malcolmsoni
UniProtKB	A0A075C4I1	COI		GO:0005743	GO_REF:0000038	IEA	UniProtKB-KW:KW-0999	C	Cytochrome c oxidase subunit 1	COI	protein	taxon:159736	20180714	UniProt	Macrobrachium malcolmsoni
UniProtKB	A0A075C4I1	COI		GO:0005743	GO_REF:0000040	IEA	UniProtKB-SubCell:SL-0168	C	Cytochrome c oxidase subunit 1	COI	protein	taxon:159736	20180714	UniProt	Macrobrachium malcolmsoni
UniProtKB	A0A075C4I1	COI		GO:0006119	GO_REF:0000041	IEA	UniPathway:UPA00705	P	Cytochrome c oxidase subunit 1	COI	protein	taxon:159736	20180714	UniProt	Macrobrachium malcolmsoni
UniProtKB	A0A075C4I1	COI		GO:0009060	GO_REF:0000002	IEA	InterPro:IPR000883	P	Cytochrome c oxidase subunit 1	COI	protein	taxon:159736	20180714	InterPro	Macrobrachium malcolmsoni
UniProtKB	A0A075C4I1	COI		GO:0016020	GO_REF:0000038	IEA	UniProtKB-KW:KW-0472	C	Cytochrome c oxidase subunit 1	COI	protein	taxon:159736	20180714	UniProt	Macrobrachium malcolmsoni
UniProtKB	A0A075C4I1	COI		GO:0016021	GO_REF:0000002	IEA	InterPro:IPR000883	C	Cytochrome c oxidase subunit 1	COI	protein	taxon:159736	20180714	InterPro	Macrobrachium malcolmsoni
UniProtKB	A0A075C4I1	COI		GO:0016021	GO_REF:0000038	IEA	UniProtKB-KW:KW-0812	C	Cytochrome c oxidase subunit 1	COI	protein	taxon:159736	20180714	UniProt	Macrobrachium malcolmsoni
UniProtKB	A0A075C4I1	COI		GO:0016491	GO_REF:0000038	IEA	UniProtKB-KW:KW-0560	F	Cytochrome c oxidase subunit 1	COI	protein	taxon:159736	20180714	UniProt	Macrobrachium malcolmsoni
UniProtKB	A0A075C4I1	COI		GO:0020037	GO_REF:0000002	IEA	InterPro:IPR000883	F	Cytochrome c oxidase subunit 1	COI	protein	taxon:159736	20180714	InterPro	Macrobrachium malcolmsoni
UniProtKB	A0A075C4I1	COI		GO:0022900	GO_REF:0000108	IEA	GO:0004129	P	Cytochrome c oxidase subunit 1	COI	protein	taxon:159736	20180714	GOC	Macrobrachium malcolmsoni
UniProtKB	A0A075C4I1	COI		GO:0046872	GO_REF:0000038	IEA	UniProtKB-KW:KW-0479	F	Cytochrome c oxidase subunit 1	COI	protein	taxon:159736	20180714	UniProt	Macrobrachium malcolmsoni
UniProtKB	A0A075C4I1	COI		GO:0055114	GO_REF:0000002	IEA	InterPro:IPR000883|InterPro:IPR023616|InterPro:IPR036927	P	Cytochrome c oxidase subunit 1	COI	protein	taxon:159736	20180714	InterPro	Macrobrachium malcolmsoni
UniProtKB	A0A075C4I1	COI		GO:0055114	GO_REF:0000038	IEA	UniProtKB-KW:KW-0249	P	Cytochrome c oxidase subunit 1	COI	protein	taxon:159736	20180714	UniProt	Macrobrachium malcolmsoni
UniProtKB	A0A075C4I1	COI		GO:0055114	GO_REF:0000038	IEA	UniProtKB-KW:KW-0560	P	Cytochrome c oxidase subunit 1	COI	protein	taxon:159736	20180714	UniProt	Macrobrachium malcolmsoni
UniProtKB	A0A075C4I1	COI		GO:0070469	GO_REF:0000038	IEA	UniProtKB-KW:KW-0679	C	Cytochrome c oxidase subunit 1	COI	protein	taxon:159736	20180714	UniProt	Macrobrachium malcolmsoni
UniProtKB	A0A075C4I1	COI		GO:1902600	GO_REF:0000108	IEA	GO:0004129	P	Cytochrome c oxidase subunit 1	COI	protein	taxon:159736	20180714	GOC	Macrobrachium malcolmsoni
UniProtKB	A0A0B4UCH1	A0A0B4UCH1		GO:0003924	GO_REF:0000002	IEA	InterPro:IPR001806	F	Rab7A		protein	taxon:79674	20180714	InterPro	Macrobrachium malcolmsoni
UniProtKB	A0A0B4UCH1	A0A0B4UCH1		GO:0005525	GO_REF:0000002	IEA	InterPro:IPR001806|InterPro:IPR005225	F	Rab7A		protein	taxon:79674	20180714	InterPro	Macrobrachium malcolmsoni
UniProtKB	A0A0B4UCH7	A0A0B4UCH7		GO:0003924	GO_REF:0000002	IEA	InterPro:IPR001806	F	Rab18		protein	taxon:79674	20180714	InterPro	Macrobrachium malcolmsoni
UniProtKB	A0A0B4UCH7	A0A0B4UCH7		GO:0005525	GO_REF:0000002	IEA	InterPro:IPR001806|InterPro:IPR005225	F	Rab18		protein	taxon:79674	20180714	InterPro	Macrobrachium malcolmsoni
UniProtKB	A0A0B4UDF3	A0A0B4UDF3		GO:0003924	GO_REF:0000002	IEA	InterPro:IPR001806	F	Rab9A		protein	taxon:79674	20180714	InterPro	Macrobrachium malcolmsoni
UniProtKB	A0A0B4UDF3	A0A0B4UDF3		GO:0005525	GO_REF:0000002	IEA	InterPro:IPR001806|InterPro:IPR005225	F	Rab9A		protein	taxon:79674	20180714	InterPro	Macrobrachium malcolmsoni
UniProtKB	A0A0B4UDF7	A0A0B4UDF7		GO:0003924	GO_REF:0000002	IEA	InterPro:IPR001806	F	Rab27A		protein	taxon:79674	20180714	InterPro	Macrobrachium malcolmsoni
UniProtKB	A0A0B4UDF7	A0A0B4UDF7		GO:0005525	GO_REF:0000002	IEA	InterPro:IPR001806|InterPro:IPR005225	F	Rab27A		protein	taxon:79674	20180714	InterPro	Macrobrachium malcolmsoni
UniProtKB	A0A0B5D104	A0A0B5D104		GO:0005759	GO_REF:0000002	IEA	InterPro:IPR003428|InterPro:IPR036561	C	GC1qR		protein	taxon:79674	20180714	InterPro	Macrobrachium malcolmsoni
UniProtKB	A0A0C5KCD0	A0A0C5KCD0		GO:0006508	GO_REF:0000002	IEA	InterPro:IPR000668	P	Cathepsin L		protein	taxon:79674	20180714	InterPro	Macrobrachium malcolmsoni
UniProtKB	A0A0C5KCD0	A0A0C5KCD0		GO:0006508	GO_REF:0000038	IEA	UniProtKB-KW:KW-0645	P	Cathepsin L		protein	taxon:79674	20180714	UniProt	Macrobrachium malcolmsoni
UniProtKB	A0A0C5KCD0	A0A0C5KCD0		GO:0008233	GO_REF:0000038	IEA	UniProtKB-KW:KW-0645	F	Cathepsin L		protein	taxon:79674	20180714	UniProt	Macrobrachium malcolmsoni
UniProtKB	A0A0C5KCD0	A0A0C5KCD0		GO:0008234	GO_REF:0000002	IEA	InterPro:IPR000668|InterPro:IPR013128	F	Cathepsin L		protein	taxon:79674	20180714	InterPro	Macrobrachium malcolmsoni
UniProtKB	A0A0C5KCD0	A0A0C5KCD0		GO:0008234	GO_REF:0000038	IEA	UniProtKB-KW:KW-0788	F	Cathepsin L		protein	taxon:79674	20180714	UniProt	Macrobrachium malcolmsoni
UniProtKB	A0A0C5KCD0	A0A0C5KCD0		GO:0016787	GO_REF:0000038	IEA	UniProtKB-KW:KW-0378	F	Cathepsin L		protein	taxon:79674	20180714	UniProt	Macrobrachium malcolmsoni
UniProtKB	C0M151	COX1		GO:0004129	GO_REF:0000002	IEA	InterPro:IPR000883|InterPro:IPR023615|InterPro:IPR023616	F	Cytochrome c oxidase subunit 1	COX1	protein	taxon:82204	20180714	InterPro	Macrobrachium malcolmsoni
UniProtKB	C0M151	COX1		GO:0004129	GO_REF:0000003	IEA	EC:1.9.3.1	F	Cytochrome c oxidase subunit 1	COX1	protein	taxon:82204	20180714	UniProt	Macrobrachium malcolmsoni
UniProtKB	C0M151	COX1		GO:0005739	GO_REF:0000038	IEA	UniProtKB-KW:KW-0496	C	Cytochrome c oxidase subunit 1	COX1	protein	taxon:82204	20180714	UniProt	Macrobrachium malcolmsoni
UniProtKB	C0M151	COX1		GO:0005743	GO_REF:0000038	IEA	UniProtKB-KW:KW-0999	C	Cytochrome c oxidase subunit 1	COX1	protein	taxon:82204	20180714	UniProt	Macrobrachium malcolmsoni
UniProtKB	C0M151	COX1		GO:0005743	GO_REF:0000040	IEA	UniProtKB-SubCell:SL-0168	C	Cytochrome c oxidase subunit 1	COX1	protein	taxon:82204	20180714	UniProt	Macrobrachium malcolmsoni
UniProtKB	C0M151	COX1		GO:0006119	GO_REF:0000041	IEA	UniPathway:UPA00705	P	Cytochrome c oxidase subunit 1	COX1	protein	taxon:82204	20180714	UniProt	Macrobrachium malcolmsoni
UniProtKB	C0M151	COX1		GO:0009060	GO_REF:0000002	IEA	InterPro:IPR000883	P	Cytochrome c oxidase subunit 1	COX1	protein	taxon:82204	20180714	InterPro	Macrobrachium malcolmsoni
UniProtKB	C0M151	COX1		GO:0016020	GO_REF:0000038	IEA	UniProtKB-KW:KW-0472	C	Cytochrome c oxidase subunit 1	COX1	protein	taxon:82204	20180714	UniProt	Macrobrachium malcolmsoni
UniProtKB	C0M151	COX1		GO:0016021	GO_REF:0000002	IEA	InterPro:IPR000883	C	Cytochrome c oxidase subunit 1	COX1	protein	taxon:82204	20180714	InterPro	Macrobrachium malcolmsoni
UniProtKB	C0M151	COX1		GO:0016021	GO_REF:0000038	IEA	UniProtKB-KW:KW-0812	C	Cytochrome c oxidase subunit 1	COX1	protein	taxon:82204	20180714	UniProt	Macrobrachium malcolmsoni
UniProtKB	C0M151	COX1		GO:0016491	GO_REF:0000038	IEA	UniProtKB-KW:KW-0560	F	Cytochrome c oxidase subunit 1	COX1	protein	taxon:82204	20180714	UniProt	Macrobrachium malcolmsoni
UniProtKB	C0M151	COX1		GO:0020037	GO_REF:0000002	IEA	InterPro:IPR000883	F	Cytochrome c oxidase subunit 1	COX1	protein	taxon:82204	20180714	InterPro	Macrobrachium malcolmsoni
UniProtKB	C0M151	COX1		GO:0022900	GO_REF:0000108	IEA	GO:0004129	P	Cytochrome c oxidase subunit 1	COX1	protein	taxon:82204	20180714	GOC	Macrobrachium malcolmsoni
UniProtKB	C0M151	COX1		GO:0045277	GO_REF:0000002	IEA	InterPro:IPR033944	C	Cytochrome c oxidase subunit 1	COX1	protein	taxon:82204	20180714	InterPro	Macrobrachium malcolmsoni
UniProtKB	C0M151	COX1		GO:0046872	GO_REF:0000038	IEA	UniProtKB-KW:KW-0479	F	Cytochrome c oxidase subunit 1	COX1	protein	taxon:82204	20180714	UniProt	Macrobrachium malcolmsoni
UniProtKB	C0M151	COX1		GO:0055114	GO_REF:0000002	IEA	InterPro:IPR000883|InterPro:IPR023615|InterPro:IPR023616|InterPro:IPR036927	P	Cytochrome c oxidase subunit 1	COX1	protein	taxon:82204	20180714	InterPro	Macrobrachium malcolmsoni
UniProtKB	C0M151	COX1		GO:0055114	GO_REF:0000038	IEA	UniProtKB-KW:KW-0249	P	Cytochrome c oxidase subunit 1	COX1	protein	taxon:82204	20180714	UniProt	Macrobrachium malcolmsoni
UniProtKB	C0M151	COX1		GO:0055114	GO_REF:0000038	IEA	UniProtKB-KW:KW-0560	P	Cytochrome c oxidase subunit 1	COX1	protein	taxon:82204	20180714	UniProt	Macrobrachium malcolmsoni
UniProtKB	C0M151	COX1		GO:0070469	GO_REF:0000038	IEA	UniProtKB-KW:KW-0679	C	Cytochrome c oxidase subunit 1	COX1	protein	taxon:82204	20180714	UniProt	Macrobrachium malcolmsoni
UniProtKB	C0M151	COX1		GO:1902600	GO_REF:0000108	IEA	GO:0004129	P	Cytochrome c oxidase subunit 1	COX1	protein	taxon:82204	20180714	GOC	Macrobrachium malcolmsoni
UniProtKB	C0M152	COX2		GO:0004129	GO_REF:0000002	IEA	InterPro:IPR002429	F	Cytochrome c oxidase subunit 2	COX2	protein	taxon:82204	20180714	InterPro	Macrobrachium malcolmsoni
UniProtKB	C0M152	COX2		GO:0005507	GO_REF:0000002	IEA	InterPro:IPR001505|InterPro:IPR002429	F	Cytochrome c oxidase subunit 2	COX2	protein	taxon:82204	20180714	InterPro	Macrobrachium malcolmsoni
UniProtKB	C0M152	COX2		GO:0005739	GO_REF:0000038	IEA	UniProtKB-KW:KW-0496	C	Cytochrome c oxidase subunit 2	COX2	protein	taxon:82204	20180714	UniProt	Macrobrachium malcolmsoni
UniProtKB	C0M152	COX2		GO:0005743	GO_REF:0000038	IEA	UniProtKB-KW:KW-0999	C	Cytochrome c oxidase subunit 2	COX2	protein	taxon:82204	20180714	UniProt	Macrobrachium malcolmsoni
UniProtKB	C0M152	COX2		GO:0005743	GO_REF:0000040	IEA	UniProtKB-SubCell:SL-0168	C	Cytochrome c oxidase subunit 2	COX2	protein	taxon:82204	20180714	UniProt	Macrobrachium malcolmsoni
UniProtKB	C0M152	COX2		GO:0016020	GO_REF:0000002	IEA	InterPro:IPR002429	C	Cytochrome c oxidase subunit 2	COX2	protein	taxon:82204	20180714	InterPro	Macrobrachium malcolmsoni
UniProtKB	C0M152	COX2		GO:0016020	GO_REF:0000038	IEA	UniProtKB-KW:KW-0472	C	Cytochrome c oxidase subunit 2	COX2	protein	taxon:82204	20180714	UniProt	Macrobrachium malcolmsoni
UniProtKB	C0M152	COX2		GO:0016021	GO_REF:0000002	IEA	InterPro:IPR011759|InterPro:IPR014222	C	Cytochrome c oxidase subunit 2	COX2	protein	taxon:82204	20180714	InterPro	Macrobrachium malcolmsoni
UniProtKB	C0M152	COX2		GO:0016021	GO_REF:0000038	IEA	UniProtKB-KW:KW-0812	C	Cytochrome c oxidase subunit 2	COX2	protein	taxon:82204	20180714	UniProt	Macrobrachium malcolmsoni
UniProtKB	C0M152	COX2		GO:0016491	GO_REF:0000002	IEA	InterPro:IPR014222	F	Cytochrome c oxidase subunit 2	COX2	protein	taxon:82204	20180714	InterPro	Macrobrachium malcolmsoni
UniProtKB	C0M152	COX2		GO:0022900	GO_REF:0000002	IEA	InterPro:IPR011759	P	Cytochrome c oxidase subunit 2	COX2	protein	taxon:82204	20180714	InterPro	Macrobrachium malcolmsoni
UniProtKB	C0M152	COX2		GO:0046872	GO_REF:0000038	IEA	UniProtKB-KW:KW-0479	F	Cytochrome c oxidase subunit 2	COX2	protein	taxon:82204	20180714	UniProt	Macrobrachium malcolmsoni
UniProtKB	C0M152	COX2		GO:0055114	GO_REF:0000038	IEA	UniProtKB-KW:KW-0249	P	Cytochrome c oxidase subunit 2	COX2	protein	taxon:82204	20180714	UniProt	Macrobrachium malcolmsoni
UniProtKB	C0M152	COX2		GO:0070469	GO_REF:0000038	IEA	UniProtKB-KW:KW-0679	C	Cytochrome c oxidase subunit 2	COX2	protein	taxon:82204	20180714	UniProt	Macrobrachium malcolmsoni
UniProtKB	C0M152	COX2		GO:1902600	GO_REF:0000108	IEA	GO:0004129	P	Cytochrome c oxidase subunit 2	COX2	protein	taxon:82204	20180714	GOC	Macrobrachium malcolmsoni
UniProtKB	C0M153	ATP8		GO:0005739	GO_REF:0000038	IEA	UniProtKB-KW:KW-0496	C	ATP synthase F0 subunit 8	ATP8	protein	taxon:82204	20180714	UniProt	Macrobrachium malcolmsoni
UniProtKB	C0M153	ATP8		GO:0016020	GO_REF:0000038	IEA	UniProtKB-KW:KW-0472	C	ATP synthase F0 subunit 8	ATP8	protein	taxon:82204	20180714	UniProt	Macrobrachium malcolmsoni
UniProtKB	C0M153	ATP8		GO:0016021	GO_REF:0000038	IEA	UniProtKB-KW:KW-0812	C	ATP synthase F0 subunit 8	ATP8	protein	taxon:82204	20180714	UniProt	Macrobrachium malcolmsoni
UniProtKB	C0M154	ATP6		GO:0005739	GO_REF:0000038	IEA	UniProtKB-KW:KW-0496	C	ATP synthase subunit a	ATP6	protein	taxon:82204	20180714	UniProt	Macrobrachium malcolmsoni
UniProtKB	C0M154	ATP6		GO:0005743	GO_REF:0000040	IEA	UniProtKB-SubCell:SL-0168	C	ATP synthase subunit a	ATP6	protein	taxon:82204	20180714	UniProt	Macrobrachium malcolmsoni
UniProtKB	C0M154	ATP6		GO:0015078	GO_REF:0000002	IEA	InterPro:IPR000568	F	ATP synthase subunit a	ATP6	protein	taxon:82204	20180714	InterPro	Macrobrachium malcolmsoni
UniProtKB	C0M154	ATP6		GO:0015986	GO_REF:0000002	IEA	InterPro:IPR000568	P	ATP synthase subunit a	ATP6	protein	taxon:82204	20180714	InterPro	Macrobrachium malcolmsoni
UniProtKB	C0M154	ATP6		GO:0016020	GO_REF:0000038	IEA	UniProtKB-KW:KW-0472	C	ATP synthase subunit a	ATP6	protein	taxon:82204	20180714	UniProt	Macrobrachium malcolmsoni
UniProtKB	C0M154	ATP6		GO:0016021	GO_REF:0000038	IEA	UniProtKB-KW:KW-0812	C	ATP synthase subunit a	ATP6	protein	taxon:82204	20180714	UniProt	Macrobrachium malcolmsoni
UniProtKB	C0M154	ATP6		GO:0045263	GO_REF:0000002	IEA	InterPro:IPR000568	C	ATP synthase subunit a	ATP6	protein	taxon:82204	20180714	InterPro	Macrobrachium malcolmsoni
UniProtKB	C0M155	COX3		GO:0004129	GO_REF:0000002	IEA	InterPro:IPR013833	F	Cytochrome c oxidase subunit 3	COX3	protein	taxon:82204	20180714	InterPro	Macrobrachium malcolmsoni
UniProtKB	C0M155	COX3		GO:0005739	GO_REF:0000038	IEA	UniProtKB-KW:KW-0496	C	Cytochrome c oxidase subunit 3	COX3	protein	taxon:82204	20180714	UniProt	Macrobrachium malcolmsoni
UniProtKB	C0M155	COX3		GO:0015002	GO_REF:0000002	IEA	InterPro:IPR000298|InterPro:IPR024791|InterPro:IPR035973	F	Cytochrome c oxidase subunit 3	COX3	protein	taxon:82204	20180714	InterPro	Macrobrachium malcolmsoni
UniProtKB	C0M155	COX3		GO:0016020	GO_REF:0000002	IEA	InterPro:IPR000298|InterPro:IPR013833|InterPro:IPR024791|InterPro:IPR035973	C	Cytochrome c oxidase subunit 3	COX3	protein	taxon:82204	20180714	InterPro	Macrobrachium malcolmsoni
UniProtKB	C0M155	COX3		GO:0016020	GO_REF:0000038	IEA	UniProtKB-KW:KW-0472	C	Cytochrome c oxidase subunit 3	COX3	protein	taxon:82204	20180714	UniProt	Macrobrachium malcolmsoni
UniProtKB	C0M155	COX3		GO:0016021	GO_REF:0000038	IEA	UniProtKB-KW:KW-0812	C	Cytochrome c oxidase subunit 3	COX3	protein	taxon:82204	20180714	UniProt	Macrobrachium malcolmsoni
UniProtKB	C0M155	COX3		GO:0019646	GO_REF:0000002	IEA	InterPro:IPR024791	P	Cytochrome c oxidase subunit 3	COX3	protein	taxon:82204	20180714	InterPro	Macrobrachium malcolmsoni
UniProtKB	C0M155	COX3		GO:0022904	GO_REF:0000002	IEA	InterPro:IPR013833	P	Cytochrome c oxidase subunit 3	COX3	protein	taxon:82204	20180714	InterPro	Macrobrachium malcolmsoni
UniProtKB	C0M155	COX3		GO:1902600	GO_REF:0000108	IEA	GO:0004129	P	Cytochrome c oxidase subunit 3	COX3	protein	taxon:82204	20180714	GOC	Macrobrachium malcolmsoni
UniProtKB	C0M156	ND3		GO:0005739	GO_REF:0000038	IEA	UniProtKB-KW:KW-0496	C	NADH-ubiquinone oxidoreductase chain 3	ND3	protein	taxon:82204	20180714	UniProt	Macrobrachium malcolmsoni
UniProtKB	C0M156	ND3		GO:0008137	GO_REF:0000002	IEA	InterPro:IPR000440	F	NADH-ubiquinone oxidoreductase chain 3	ND3	protein	taxon:82204	20180714	InterPro	Macrobrachium malcolmsoni
UniProtKB	C0M156	ND3		GO:0008137	GO_REF:0000003	IEA	EC:1.6.5.3	F	NADH-ubiquinone oxidoreductase chain 3	ND3	protein	taxon:82204	20180714	UniProt	Macrobrachium malcolmsoni
UniProtKB	C0M156	ND3		GO:0016020	GO_REF:0000038	IEA	UniProtKB-KW:KW-0472	C	NADH-ubiquinone oxidoreductase chain 3	ND3	protein	taxon:82204	20180714	UniProt	Macrobrachium malcolmsoni
UniProtKB	C0M156	ND3		GO:0016021	GO_REF:0000038	IEA	UniProtKB-KW:KW-0812	C	NADH-ubiquinone oxidoreductase chain 3	ND3	protein	taxon:82204	20180714	UniProt	Macrobrachium malcolmsoni
UniProtKB	C0M156	ND3		GO:0016491	GO_REF:0000038	IEA	UniProtKB-KW:KW-0560	F	NADH-ubiquinone oxidoreductase chain 3	ND3	protein	taxon:82204	20180714	UniProt	Macrobrachium malcolmsoni
UniProtKB	C0M156	ND3		GO:0031966	GO_REF:0000040	IEA	UniProtKB-SubCell:SL-0171	C	NADH-ubiquinone oxidoreductase chain 3	ND3	protein	taxon:82204	20180714	UniProt	Macrobrachium malcolmsoni
UniProtKB	C0M156	ND3		GO:0055114	GO_REF:0000002	IEA	InterPro:IPR000440	P	NADH-ubiquinone oxidoreductase chain 3	ND3	protein	taxon:82204	20180714	InterPro	Macrobrachium malcolmsoni
UniProtKB	C0M156	ND3		GO:0055114	GO_REF:0000038	IEA	UniProtKB-KW:KW-0249	P	NADH-ubiquinone oxidoreductase chain 3	ND3	protein	taxon:82204	20180714	UniProt	Macrobrachium malcolmsoni
UniProtKB	C0M156	ND3		GO:0055114	GO_REF:0000038	IEA	UniProtKB-KW:KW-0560	P	NADH-ubiquinone oxidoreductase chain 3	ND3	protein	taxon:82204	20180714	UniProt	Macrobrachium malcolmsoni
UniProtKB	C0M156	ND3		GO:0070469	GO_REF:0000038	IEA	UniProtKB-KW:KW-0679	C	NADH-ubiquinone oxidoreductase chain 3	ND3	protein	taxon:82204	20180714	UniProt	Macrobrachium malcolmsoni
UniProtKB	C0M157	ND5		GO:0005739	GO_REF:0000038	IEA	UniProtKB-KW:KW-0496	C	NADH-ubiquinone oxidoreductase chain 5	ND5	protein	taxon:82204	20180714	UniProt	Macrobrachium malcolmsoni
UniProtKB	C0M157	ND5		GO:0005743	GO_REF:0000038	IEA	UniProtKB-KW:KW-0999	C	NADH-ubiquinone oxidoreductase chain 5	ND5	protein	taxon:82204	20180714	UniProt	Macrobrachium malcolmsoni
UniProtKB	C0M157	ND5		GO:0005743	GO_REF:0000040	IEA	UniProtKB-SubCell:SL-0168	C	NADH-ubiquinone oxidoreductase chain 5	ND5	protein	taxon:82204	20180714	UniProt	Macrobrachium malcolmsoni
UniProtKB	C0M157	ND5		GO:0008137	GO_REF:0000002	IEA	InterPro:IPR010934|InterPro:IPR018393	F	NADH-ubiquinone oxidoreductase chain 5	ND5	protein	taxon:82204	20180714	InterPro	Macrobrachium malcolmsoni
UniProtKB	C0M157	ND5		GO:0008137	GO_REF:0000003	IEA	EC:1.6.5.3	F	NADH-ubiquinone oxidoreductase chain 5	ND5	protein	taxon:82204	20180714	UniProt	Macrobrachium malcolmsoni
UniProtKB	C0M157	ND5		GO:0016020	GO_REF:0000038	IEA	UniProtKB-KW:KW-0472	C	NADH-ubiquinone oxidoreductase chain 5	ND5	protein	taxon:82204	20180714	UniProt	Macrobrachium malcolmsoni
UniProtKB	C0M157	ND5		GO:0016021	GO_REF:0000038	IEA	UniProtKB-KW:KW-0812	C	NADH-ubiquinone oxidoreductase chain 5	ND5	protein	taxon:82204	20180714	UniProt	Macrobrachium malcolmsoni
UniProtKB	C0M157	ND5		GO:0016491	GO_REF:0000038	IEA	UniProtKB-KW:KW-0560	F	NADH-ubiquinone oxidoreductase chain 5	ND5	protein	taxon:82204	20180714	UniProt	Macrobrachium malcolmsoni
UniProtKB	C0M157	ND5		GO:0042773	GO_REF:0000002	IEA	InterPro:IPR010934|InterPro:IPR018393	P	NADH-ubiquinone oxidoreductase chain 5	ND5	protein	taxon:82204	20180714	InterPro	Macrobrachium malcolmsoni
UniProtKB	C0M157	ND5		GO:0055114	GO_REF:0000002	IEA	InterPro:IPR010934|InterPro:IPR018393	P	NADH-ubiquinone oxidoreductase chain 5	ND5	protein	taxon:82204	20180714	InterPro	Macrobrachium malcolmsoni
UniProtKB	C0M157	ND5		GO:0055114	GO_REF:0000038	IEA	UniProtKB-KW:KW-0249	P	NADH-ubiquinone oxidoreductase chain 5	ND5	protein	taxon:82204	20180714	UniProt	Macrobrachium malcolmsoni
UniProtKB	C0M157	ND5		GO:0055114	GO_REF:0000038	IEA	UniProtKB-KW:KW-0560	P	NADH-ubiquinone oxidoreductase chain 5	ND5	protein	taxon:82204	20180714	UniProt	Macrobrachium malcolmsoni
UniProtKB	C0M157	ND5		GO:0070469	GO_REF:0000038	IEA	UniProtKB-KW:KW-0679	C	NADH-ubiquinone oxidoreductase chain 5	ND5	protein	taxon:82204	20180714	UniProt	Macrobrachium malcolmsoni
UniProtKB	C0M158	ND4		GO:0005739	GO_REF:0000038	IEA	UniProtKB-KW:KW-0496	C	NADH-ubiquinone oxidoreductase chain 4	ND4	protein	taxon:82204	20180714	UniProt	Macrobrachium malcolmsoni
UniProtKB	C0M158	ND4		GO:0006120	GO_REF:0000002	IEA	InterPro:IPR000260	P	NADH-ubiquinone oxidoreductase chain 4	ND4	protein	taxon:82204	20180714	InterPro	Macrobrachium malcolmsoni
UniProtKB	C0M158	ND4		GO:0008137	GO_REF:0000002	IEA	InterPro:IPR003918	F	NADH-ubiquinone oxidoreductase chain 4	ND4	protein	taxon:82204	20180714	InterPro	Macrobrachium malcolmsoni
UniProtKB	C0M158	ND4		GO:0008137	GO_REF:0000003	IEA	EC:1.6.5.3	F	NADH-ubiquinone oxidoreductase chain 4	ND4	protein	taxon:82204	20180714	UniProt	Macrobrachium malcolmsoni
UniProtKB	C0M158	ND4		GO:0016020	GO_REF:0000038	IEA	UniProtKB-KW:KW-0472	C	NADH-ubiquinone oxidoreductase chain 4	ND4	protein	taxon:82204	20180714	UniProt	Macrobrachium malcolmsoni
UniProtKB	C0M158	ND4		GO:0016021	GO_REF:0000038	IEA	UniProtKB-KW:KW-0812	C	NADH-ubiquinone oxidoreductase chain 4	ND4	protein	taxon:82204	20180714	UniProt	Macrobrachium malcolmsoni
UniProtKB	C0M158	ND4		GO:0016491	GO_REF:0000038	IEA	UniProtKB-KW:KW-0560	F	NADH-ubiquinone oxidoreductase chain 4	ND4	protein	taxon:82204	20180714	UniProt	Macrobrachium malcolmsoni
UniProtKB	C0M158	ND4		GO:0042773	GO_REF:0000002	IEA	InterPro:IPR003918	P	NADH-ubiquinone oxidoreductase chain 4	ND4	protein	taxon:82204	20180714	InterPro	Macrobrachium malcolmsoni
UniProtKB	C0M158	ND4		GO:0055114	GO_REF:0000002	IEA	InterPro:IPR000260|InterPro:IPR003918	P	NADH-ubiquinone oxidoreductase chain 4	ND4	protein	taxon:82204	20180714	InterPro	Macrobrachium malcolmsoni
UniProtKB	C0M158	ND4		GO:0055114	GO_REF:0000038	IEA	UniProtKB-KW:KW-0560	P	NADH-ubiquinone oxidoreductase chain 4	ND4	protein	taxon:82204	20180714	UniProt	Macrobrachium malcolmsoni
UniProtKB	C0M159	ND4L		GO:0005739	GO_REF:0000038	IEA	UniProtKB-KW:KW-0496	C	NADH-ubiquinone oxidoreductase chain 4L	ND4L	protein	taxon:82204	20180714	UniProt	Macrobrachium malcolmsoni
UniProtKB	C0M159	ND4L		GO:0008137	GO_REF:0000003	IEA	EC:1.6.5.3	F	NADH-ubiquinone oxidoreductase chain 4L	ND4L	protein	taxon:82204	20180714	UniProt	Macrobrachium malcolmsoni
UniProtKB	C0M159	ND4L		GO:0016020	GO_REF:0000038	IEA	UniProtKB-KW:KW-0472	C	NADH-ubiquinone oxidoreductase chain 4L	ND4L	protein	taxon:82204	20180714	UniProt	Macrobrachium malcolmsoni
UniProtKB	C0M159	ND4L		GO:0016021	GO_REF:0000038	IEA	UniProtKB-KW:KW-0812	C	NADH-ubiquinone oxidoreductase chain 4L	ND4L	protein	taxon:82204	20180714	UniProt	Macrobrachium malcolmsoni
UniProtKB	C0M159	ND4L		GO:0016491	GO_REF:0000038	IEA	UniProtKB-KW:KW-0560	F	NADH-ubiquinone oxidoreductase chain 4L	ND4L	protein	taxon:82204	20180714	UniProt	Macrobrachium malcolmsoni
UniProtKB	C0M159	ND4L		GO:0016651	GO_REF:0000002	IEA	InterPro:IPR001133	F	NADH-ubiquinone oxidoreductase chain 4L	ND4L	protein	taxon:82204	20180714	InterPro	Macrobrachium malcolmsoni
UniProtKB	C0M159	ND4L		GO:0042773	GO_REF:0000002	IEA	InterPro:IPR001133	P	NADH-ubiquinone oxidoreductase chain 4L	ND4L	protein	taxon:82204	20180714	InterPro	Macrobrachium malcolmsoni
UniProtKB	C0M159	ND4L		GO:0055114	GO_REF:0000002	IEA	InterPro:IPR001133	P	NADH-ubiquinone oxidoreductase chain 4L	ND4L	protein	taxon:82204	20180714	InterPro	Macrobrachium malcolmsoni
UniProtKB	C0M159	ND4L		GO:0055114	GO_REF:0000038	IEA	UniProtKB-KW:KW-0560	P	NADH-ubiquinone oxidoreductase chain 4L	ND4L	protein	taxon:82204	20180714	UniProt	Macrobrachium malcolmsoni
UniProtKB	C0M160	ND6		GO:0005739	GO_REF:0000038	IEA	UniProtKB-KW:KW-0496	C	NADH-ubiquinone oxidoreductase chain 6	ND6	protein	taxon:82204	20180714	UniProt	Macrobrachium malcolmsoni
UniProtKB	C0M160	ND6		GO:0008137	GO_REF:0000002	IEA	InterPro:IPR001457	F	NADH-ubiquinone oxidoreductase chain 6	ND6	protein	taxon:82204	20180714	InterPro	Macrobrachium malcolmsoni
UniProtKB	C0M160	ND6		GO:0008137	GO_REF:0000003	IEA	EC:1.6.5.3	F	NADH-ubiquinone oxidoreductase chain 6	ND6	protein	taxon:82204	20180714	UniProt	Macrobrachium malcolmsoni
UniProtKB	C0M160	ND6		GO:0016020	GO_REF:0000038	IEA	UniProtKB-KW:KW-0472	C	NADH-ubiquinone oxidoreductase chain 6	ND6	protein	taxon:82204	20180714	UniProt	Macrobrachium malcolmsoni
UniProtKB	C0M160	ND6		GO:0016021	GO_REF:0000038	IEA	UniProtKB-KW:KW-0812	C	NADH-ubiquinone oxidoreductase chain 6	ND6	protein	taxon:82204	20180714	UniProt	Macrobrachium malcolmsoni
UniProtKB	C0M160	ND6		GO:0016491	GO_REF:0000038	IEA	UniProtKB-KW:KW-0560	F	NADH-ubiquinone oxidoreductase chain 6	ND6	protein	taxon:82204	20180714	UniProt	Macrobrachium malcolmsoni
UniProtKB	C0M160	ND6		GO:0055114	GO_REF:0000002	IEA	InterPro:IPR001457	P	NADH-ubiquinone oxidoreductase chain 6	ND6	protein	taxon:82204	20180714	InterPro	Macrobrachium malcolmsoni
UniProtKB	C0M160	ND6		GO:0055114	GO_REF:0000038	IEA	UniProtKB-KW:KW-0560	P	NADH-ubiquinone oxidoreductase chain 6	ND6	protein	taxon:82204	20180714	UniProt	Macrobrachium malcolmsoni
UniProtKB	C0M161	CYTB		GO:0005739	GO_REF:0000038	IEA	UniProtKB-KW:KW-0496	C	Cytochrome b	CYTB	protein	taxon:82204	20180714	UniProt	Macrobrachium malcolmsoni
UniProtKB	C0M161	CYTB		GO:0005743	GO_REF:0000040	IEA	UniProtKB-SubCell:SL-0168	C	Cytochrome b	CYTB	protein	taxon:82204	20180714	UniProt	Macrobrachium malcolmsoni
UniProtKB	C0M161	CYTB		GO:0006122	GO_REF:0000002	IEA	InterPro:IPR030689	P	Cytochrome b	CYTB	protein	taxon:82204	20180714	InterPro	Macrobrachium malcolmsoni
UniProtKB	C0M161	CYTB		GO:0008121	GO_REF:0000002	IEA	InterPro:IPR030689	F	Cytochrome b	CYTB	protein	taxon:82204	20180714	InterPro	Macrobrachium malcolmsoni
UniProtKB	C0M161	CYTB		GO:0009055	GO_REF:0000002	IEA	InterPro:IPR005797|InterPro:IPR005798|InterPro:IPR030689|InterPro:IPR036150	F	Cytochrome b	CYTB	protein	taxon:82204	20180714	InterPro	Macrobrachium malcolmsoni
UniProtKB	C0M161	CYTB		GO:0016020	GO_REF:0000002	IEA	InterPro:IPR005797|InterPro:IPR005798|InterPro:IPR016174|InterPro:IPR036150	C	Cytochrome b	CYTB	protein	taxon:82204	20180714	InterPro	Macrobrachium malcolmsoni
UniProtKB	C0M161	CYTB		GO:0016020	GO_REF:0000038	IEA	UniProtKB-KW:KW-0472	C	Cytochrome b	CYTB	protein	taxon:82204	20180714	UniProt	Macrobrachium malcolmsoni
UniProtKB	C0M161	CYTB		GO:0016021	GO_REF:0000038	IEA	UniProtKB-KW:KW-0812	C	Cytochrome b	CYTB	protein	taxon:82204	20180714	UniProt	Macrobrachium malcolmsoni
UniProtKB	C0M161	CYTB		GO:0016491	GO_REF:0000002	IEA	InterPro:IPR005797|InterPro:IPR005798|InterPro:IPR036150	F	Cytochrome b	CYTB	protein	taxon:82204	20180714	InterPro	Macrobrachium malcolmsoni
UniProtKB	C0M161	CYTB		GO:0022904	GO_REF:0000002	IEA	InterPro:IPR016174	P	Cytochrome b	CYTB	protein	taxon:82204	20180714	InterPro	Macrobrachium malcolmsoni
UniProtKB	C0M161	CYTB		GO:0045275	GO_REF:0000002	IEA	InterPro:IPR030689	C	Cytochrome b	CYTB	protein	taxon:82204	20180714	InterPro	Macrobrachium malcolmsoni
UniProtKB	C0M161	CYTB		GO:0046872	GO_REF:0000038	IEA	UniProtKB-KW:KW-0479	F	Cytochrome b	CYTB	protein	taxon:82204	20180714	UniProt	Macrobrachium malcolmsoni
UniProtKB	C0M161	CYTB		GO:0046872	GO_REF:0000104	IEA	UniRule:UR000172772	F	Cytochrome b	CYTB	protein	taxon:82204	20180714	UniProt	Macrobrachium malcolmsoni
UniProtKB	C0M161	CYTB		GO:0055114	GO_REF:0000038	IEA	UniProtKB-KW:KW-0249	P	Cytochrome b	CYTB	protein	taxon:82204	20180714	UniProt	Macrobrachium malcolmsoni
UniProtKB	C0M161	CYTB		GO:0070469	GO_REF:0000038	IEA	UniProtKB-KW:KW-0679	C	Cytochrome b	CYTB	protein	taxon:82204	20180714	UniProt	Macrobrachium malcolmsoni
UniProtKB	A0A0A6ZEG8	A0A0A6ZEG8		GO:0000166	GO_REF:0000038	IEA	UniProtKB-KW:KW-0547	F	Heat shock protein 70		protein	taxon:159736	20180714	UniProt	Macrobrachium lanchesteri
UniProtKB	A0A0A6ZEG8	A0A0A6ZEG8		GO:0005524	GO_REF:0000038	IEA	UniProtKB-KW:KW-0067	F	Heat shock protein 70		protein	taxon:159736	20180714	UniProt
UniProtKB	A0A0A7AD33	A0A0A7AD33		GO:0005524	GO_REF:0000002	IEA	InterPro:IPR002423|InterPro:IPR018370	F	HSP60		protein	taxon:159736	20180714	InterPro
UniProtKB	A0A0A7AD33	A0A0A7AD33		GO:0005737	GO_REF:0000002	IEA	InterPro:IPR001844|InterPro:IPR018370	C	HSP60		protein	taxon:159736	20180714	InterPro
UniProtKB	A0A0A7AD33	A0A0A7AD33		GO:0006457	GO_REF:0000002	IEA	InterPro:IPR018370	P	HSP60		protein	taxon:159736	20180714	InterPro
UniProtKB	A0A0A7AD33	A0A0A7AD33		GO:0042026	GO_REF:0000002	IEA	InterPro:IPR001844	P	HSP60		protein	taxon:159736	20180714	InterPro
UniProtKB	A0A0A7P9J9	A0A0A7P9J9		GO:0046872	GO_REF:0000002	IEA	InterPro:IPR002045|InterPro:IPR017854	F	Metallothionein		protein	taxon:159736	20180714	InterPro
UniProtKB	A0A0B4L994	A0A0B4L994		GO:0004601	GO_REF:0000038	IEA	UniProtKB-KW:KW-0575	F	Peroxiredoxin		protein	taxon:159736	20180714	UniProt
UniProtKB	A0A0B4L994	A0A0B4L994		GO:0005623	GO_REF:0000108	IEA	GO:0045454	C	Peroxiredoxin		protein	taxon:159736	20180714	GOC
UniProtKB	A0A0B4L994	A0A0B4L994		GO:0016209	GO_REF:0000002	IEA	InterPro:IPR000866	F	Peroxiredoxin		protein	taxon:159736	20180714	InterPro
UniProtKB	A0A0B4L994	A0A0B4L994		GO:0016491	GO_REF:0000002	IEA	InterPro:IPR000866	F	Peroxiredoxin		protein	taxon:159736	20180714	InterPro
UniProtKB	A0A0B4L994	A0A0B4L994		GO:0016491	GO_REF:0000038	IEA	UniProtKB-KW:KW-0560	F	Peroxiredoxin		protein	taxon:159736	20180714	UniProt
UniProtKB	A0A0B4L994	A0A0B4L994		GO:0045454	GO_REF:0000002	IEA	InterPro:IPR013766	P	Peroxiredoxin		protein	taxon:159736	20180714	InterPro
UniProtKB	A0A0B4L994	A0A0B4L994		GO:0051920	GO_REF:0000002	IEA	InterPro:IPR019479	F	Peroxiredoxin		protein	taxon:159736	20180714	InterPro
UniProtKB	A0A0B4L994	A0A0B4L994		GO:0051920	GO_REF:0000003	IEA	EC:1.11.1.15	F	Peroxiredoxin		protein	taxon:159736	20180714	UniProt
UniProtKB	A0A0B4L994	A0A0B4L994		GO:0055114	GO_REF:0000002	IEA	InterPro:IPR000866|InterPro:IPR019479	P	Peroxiredoxin		protein	taxon:159736	20180714	InterPro
UniProtKB	A0A0B4L994	A0A0B4L994		GO:0055114	GO_REF:0000038	IEA	UniProtKB-KW:KW-0560	P	Peroxiredoxin		protein	taxon:159736	20180714	UniProt
UniProtKB	A0A0B4L994	A0A0B4L994		GO:0098869	GO_REF:0000108	IEA	GO:0004601	P	Peroxiredoxin		protein	taxon:159736	20180714	GOC
UniProtKB	A0A0B4L994	A0A0B4L994		GO:0098869	GO_REF:0000108	IEA	GO:0016209	P	Peroxiredoxin		protein	taxon:159736	20180714	GOC
UniProtKB	A0A0B4L994	A0A0B4L994		GO:0098869	GO_REF:0000108	IEA	GO:0051920	P	Peroxiredoxin		protein	taxon:159736	20180714	GOC
UniProtKB	A0A0C4MWF6	A0A0C4MWF6		GO:0005184	GO_REF:0000002	IEA	InterPro:IPR001166|InterPro:IPR001262|InterPro:IPR018251	F	Molt inhibiting hormone		protein	taxon:159736	20180714	InterPro
UniProtKB	A0A0C4MWF6	A0A0C4MWF6		GO:0005576	GO_REF:0000002	IEA	InterPro:IPR001166|InterPro:IPR001262|InterPro:IPR018251	C	Molt inhibiting hormone		protein	taxon:159736	20180714	InterPro
UniProtKB	A0A0C4MWF6	A0A0C4MWF6		GO:0010469	GO_REF:0000108	IEA	GO:0005184	P	Molt inhibiting hormone		protein	taxon:159736	20180714	GOC
UniProtKB	A0A0C5B847	A0A0C5B847		GO:0005184	GO_REF:0000002	IEA	InterPro:IPR001166|InterPro:IPR001262|InterPro:IPR018251	F	Macrobrachium nipponense molt inhibiting hormone protein		protein	taxon:159736	20180714	InterPro
UniProtKB	A0A0C5B847	A0A0C5B847		GO:0005576	GO_REF:0000002	IEA	InterPro:IPR001166|InterPro:IPR001262|InterPro:IPR018251	C	Macrobrachium nipponense molt inhibiting hormone protein		protein	taxon:159736	20180714	InterPro
UniProtKB	A0A0C5B847	A0A0C5B847		GO:0010469	GO_REF:0000108	IEA	GO:0005184	P	Macrobrachium nipponense molt inhibiting hormone protein		protein	taxon:159736	20180714	GOC
UniProtKB	A0A0C5QJ28	IAGBP		GO:0001558	GO_REF:0000002	IEA	InterPro:IPR000867|InterPro:IPR011390	P	Insulin-like androgenic gland hormone binding protein type II	IAGBP	protein	taxon:159736	20180714	InterPro
UniProtKB	A0A0C5QJ28	IAGBP		GO:0005520	GO_REF:0000002	IEA	InterPro:IPR000867|InterPro:IPR011390	F	Insulin-like androgenic gland hormone binding protein type II	IAGBP	protein	taxon:159736	20180714	InterPro
UniProtKB	A0A0C5QJ28	IAGBP		GO:0005576	GO_REF:0000002	IEA	InterPro:IPR000867|InterPro:IPR011390	C	Insulin-like androgenic gland hormone binding protein type II	IAGBP	protein	taxon:159736	20180714	InterPro
UniProtKB	A0A0C5QWQ1	IAGBP		GO:0001558	GO_REF:0000002	IEA	InterPro:IPR000867|InterPro:IPR011390	P	Insulin-like androgenic gland hormone binding protein	IAGBP	protein	taxon:159736	20180714	InterPro
UniProtKB	A0A0C5QWQ1	IAGBP		GO:0005520	GO_REF:0000002	IEA	InterPro:IPR000867|InterPro:IPR011390	F	Insulin-like androgenic gland hormone binding protein	IAGBP	protein	taxon:159736	20180714	InterPro
UniProtKB	A0A0C5QWQ1	IAGBP		GO:0005576	GO_REF:0000002	IEA	InterPro:IPR000867|InterPro:IPR011390	C	Insulin-like androgenic gland hormone binding protein	IAGBP	protein	taxon:159736	20180714	InterPro
UniProtKB	A0A0D3RY82	A0A0D3RY82		GO:0046872	GO_REF:0000038	IEA	UniProtKB-KW:KW-0479	F	Cysteine-rich protein		protein	taxon:159736	20180714	UniProt
UniProtKB	A0A0E3JBN6	A0A0E3JBN6		GO:0005319	GO_REF:0000002	IEA	InterPro:IPR001747|InterPro:IPR009454|InterPro:IPR015255|InterPro:IPR015816|InterPro:IPR015819	F	Vitellogenin		protein	taxon:159736	20180714	InterPro
UniProtKB	A0A0E3JBN6	A0A0E3JBN6		GO:0006869	GO_REF:0000002	IEA	InterPro:IPR001747|InterPro:IPR009454|InterPro:IPR015255|InterPro:IPR015816|InterPro:IPR015819	P	Vitellogenin		protein	taxon:159736	20180714	InterPro
UniProtKB	A0A0E3JBQ2	A0A0E3JBQ2		GO:0005509	GO_REF:0000002	IEA	InterPro:IPR001881|InterPro:IPR018097	F	Vitellogenin receptor		protein	taxon:159736	20180714	InterPro
UniProtKB	A0A0E3JBQ2	A0A0E3JBQ2		GO:0016020	GO_REF:0000038	IEA	UniProtKB-KW:KW-0472	C	Vitellogenin receptor		protein	taxon:159736	20180714	UniProt
UniProtKB	A0A0E3JBQ2	A0A0E3JBQ2		GO:0016021	GO_REF:0000038	IEA	UniProtKB-KW:KW-0812	C	Vitellogenin receptor		protein	taxon:159736	20180714	UniProt
UniProtKB	A0A0F6MXI9	MSL3		GO:0005634	GO_REF:0000002	IEA	InterPro:IPR008676	C	Male-specific lethal 3	MSL3	protein	taxon:159736	20180714	InterPro
UniProtKB	A0A0F6MXI9	MSL3		GO:0005634	GO_REF:0000040	IEA	UniProtKB-SubCell:SL-0191	C	Male-specific lethal 3	MSL3	protein	taxon:159736	20180714	UniProt
UniProtKB	A0A0F6MXI9	MSL3		GO:0006325	GO_REF:0000002	IEA	InterPro:IPR008676	P	Male-specific lethal 3	MSL3	protein	taxon:159736	20180714	InterPro
UniProtKB	A0A0F6MXI9	MSL3		GO:0006325	GO_REF:0000038	IEA	UniProtKB-KW:KW-0156	P	Male-specific lethal 3	MSL3	protein	taxon:159736	20180714	UniProt
UniProtKB	A0A0F6MXI9	MSL3		GO:0006325	GO_REF:0000104	IEA	UniRule:UR000415126	P	Male-specific lethal 3	MSL3	protein	taxon:159736	20180714	UniProt
UniProtKB	A0A0F6MXI9	MSL3		GO:0006351	GO_REF:0000038	IEA	UniProtKB-KW:KW-0804	P	Male-specific lethal 3	MSL3	protein	taxon:159736	20180714	UniProt
UniProtKB	A0A0F6MXI9	MSL3		GO:0006351	GO_REF:0000104	IEA	UniRule:UR000415126	P	Male-specific lethal 3	MSL3	protein	taxon:159736	20180714	UniProt
UniProtKB	A0A0F6MXI9	MSL3		GO:0006355	GO_REF:0000002	IEA	InterPro:IPR008676	P	Male-specific lethal 3	MSL3	protein	taxon:159736	20180714	InterPro
UniProtKB	A0A0F6MXI9	MSL3		GO:0006355	GO_REF:0000038	IEA	UniProtKB-KW:KW-0805	P	Male-specific lethal 3	MSL3	protein	taxon:159736	20180714	UniProt
UniProtKB	A0A0F6MXI9	MSL3		GO:0006355	GO_REF:0000104	IEA	UniRule:UR000415126	P	Male-specific lethal 3	MSL3	protein	taxon:159736	20180714	UniProt
UniProtKB	A0A0F6YSL5	A0A0F6YSL5		GO:0000166	GO_REF:0000038	IEA	UniProtKB-KW:KW-0547	F	Insulin-like receptor		protein	taxon:79674	20180714	UniProt
UniProtKB	A0A0F6YSL5	A0A0F6YSL5		GO:0004672	GO_REF:0000002	IEA	InterPro:IPR000719|InterPro:IPR001245|InterPro:IPR008266	F	Insulin-like receptor		protein	taxon:79674	20180714	InterPro
UniProtKB	A0A0F6YSL5	A0A0F6YSL5		GO:0004713	GO_REF:0000002	IEA	InterPro:IPR020635	F	Insulin-like receptor		protein	taxon:79674	20180714	InterPro
UniProtKB	A0A0F6YSL5	A0A0F6YSL5		GO:0004713	GO_REF:0000038	IEA	UniProtKB-KW:KW-0829	F	Insulin-like receptor		protein	taxon:79674	20180714	UniProt
UniProtKB	A0A0F6YSL5	A0A0F6YSL5		GO:0005524	GO_REF:0000002	IEA	InterPro:IPR000719|InterPro:IPR017441	F	Insulin-like receptor		protein	taxon:79674	20180714	InterPro
UniProtKB	A0A0F6YSL5	A0A0F6YSL5		GO:0005524	GO_REF:0000038	IEA	UniProtKB-KW:KW-0067	F	Insulin-like receptor		protein	taxon:79674	20180714	UniProt
UniProtKB	A0A0F6YSL5	A0A0F6YSL5		GO:0006468	GO_REF:0000002	IEA	InterPro:IPR000719|InterPro:IPR001245|InterPro:IPR008266|InterPro:IPR020635	P	Insulin-like receptor		protein	taxon:79674	20180714	InterPro
UniProtKB	A0A0F6YSL5	A0A0F6YSL5		GO:0016020	GO_REF:0000038	IEA	UniProtKB-KW:KW-0472	C	Insulin-like receptor		protein	taxon:79674	20180714	UniProt
UniProtKB	A0A0F6YSL5	A0A0F6YSL5		GO:0016021	GO_REF:0000038	IEA	UniProtKB-KW:KW-0812	C	Insulin-like receptor		protein	taxon:79674	20180714	UniProt
UniProtKB	A0A0F6YSL5	A0A0F6YSL5		GO:0016301	GO_REF:0000038	IEA	UniProtKB-KW:KW-0418	F	Insulin-like receptor		protein	taxon:79674	20180714	UniProt
UniProtKB	A0A0F6YSL5	A0A0F6YSL5		GO:0016310	GO_REF:0000038	IEA	UniProtKB-KW:KW-0418	P	Insulin-like receptor		protein	taxon:79674	20180714	UniProt
UniProtKB	A0A0F6YSL5	A0A0F6YSL5		GO:0016740	GO_REF:0000038	IEA	UniProtKB-KW:KW-0808	F	Insulin-like receptor		protein	taxon:79674	20180714	UniProt
UniProtKB	A0A0F6YSL5	A0A0F6YSL5		GO:0018108	GO_REF:0000108	IEA	GO:0004713	P	Insulin-like receptor		protein	taxon:79674	20180714	GOC
UniProtKB	A0A0F7RQ78	hsp90		GO:0005524	GO_REF:0000002	IEA	InterPro:IPR001404|InterPro:IPR019805	F	Heat shock protein 90	hsp90	protein	taxon:79674	20180714	InterPro
UniProtKB	A0A0F7RQ78	hsp90		GO:0006457	GO_REF:0000002	IEA	InterPro:IPR001404|InterPro:IPR019805	P	Heat shock protein 90	hsp90	protein	taxon:79674	20180714	InterPro
UniProtKB	A0A0F7RQ78	hsp90		GO:0006950	GO_REF:0000002	IEA	InterPro:IPR001404|InterPro:IPR019805	P	Heat shock protein 90	hsp90	protein	taxon:79674	20180714	InterPro
UniProtKB	A0A0F7RQ78	hsp90		GO:0051082	GO_REF:0000002	IEA	InterPro:IPR001404|InterPro:IPR019805	F	Heat shock protein 90	hsp90	protein	taxon:79674	20180714	InterPro
UniProtKB	A0A0F7RQR4	hsp70		GO:0000166	GO_REF:0000038	IEA	UniProtKB-KW:KW-0547	F	Heat shock protein 70	hsp70	protein	taxon:79674	20180714	UniProt
UniProtKB	A0A0F7RQR4	hsp70		GO:0005524	GO_REF:0000038	IEA	UniProtKB-KW:KW-0067	F	Heat shock protein 70	hsp70	protein	taxon:79674	20180714	UniProt
UniProtKB	A0A0F7RQU4	hsp60		GO:0005524	GO_REF:0000002	IEA	InterPro:IPR002423|InterPro:IPR018370	F	Heat shock protein 60	hsp60	protein	taxon:79674	20180714	InterPro
UniProtKB	A0A0F7RQU4	hsp60		GO:0005737	GO_REF:0000002	IEA	InterPro:IPR001844|InterPro:IPR018370	C	Heat shock protein 60	hsp60	protein	taxon:79674	20180714	InterPro
UniProtKB	A0A0F7RQU4	hsp60		GO:0006457	GO_REF:0000002	IEA	InterPro:IPR018370	P	Heat shock protein 60	hsp60	protein	taxon:79674	20180714	InterPro
UniProtKB	A0A0F7RQU4	hsp60		GO:0042026	GO_REF:0000002	IEA	InterPro:IPR001844	P	Heat shock protein 60	hsp60	protein	taxon:79674	20180714	InterPro
UniProtKB	A0A0F7RQZ9	gstk		GO:0004364	GO_REF:0000003	IEA	EC:2.5.1.18	F	Glutathione S-transferase kappa	gstk	protein	taxon:79674	20180714	UniProt
UniProtKB	A0A0F7RQZ9	gstk		GO:0004364	GO_REF:0000104	IEA	UniRule:UR000444516	F	Glutathione S-transferase kappa	gstk	protein	taxon:79674	20180714	UniProt
UniProtKB	A0A0F7RQZ9	gstk		GO:0015035	GO_REF:0000002	IEA	InterPro:IPR001853	F	Glutathione S-transferase kappa	gstk	protein	taxon:79674	20180714	InterPro
UniProtKB	A0A0F7RQZ9	gstk		GO:0016740	GO_REF:0000038	IEA	UniProtKB-KW:KW-0808	F	Glutathione S-transferase kappa	gstk	protein	taxon:79674	20180714	UniProt
UniProtKB	A0A0F7RQZ9	gstk		GO:0055114	GO_REF:0000108	IEA	GO:0015035	P	Glutathione S-transferase kappa	gstk	protein	taxon:79674	20180714	GOC
UniProtKB	A0A0G2RAB7	A0A0G2RAB7		GO:0004197	GO_REF:0000002	IEA	InterPro:IPR001309|InterPro:IPR002138	F	Caspase		protein	taxon:79674	20180714	InterPro
UniProtKB	A0A0G2RAB7	A0A0G2RAB7		GO:0006508	GO_REF:0000002	IEA	InterPro:IPR001309|InterPro:IPR002138	P	Caspase		protein	taxon:79674	20180714	InterPro
UniProtKB	A0A0G2RAB7	A0A0G2RAB7		GO:0008234	GO_REF:0000002	IEA	InterPro:IPR015917	F	Caspase		protein	taxon:79674	20180714	InterPro
UniProtKB	A0A0G2ST79	CO1		GO:0004129	GO_REF:0000002	IEA	InterPro:IPR000883|InterPro:IPR023616	F	Cytochrome c oxidase subunit 1	CO1	protein	taxon:79674	20180714	InterPro
UniProtKB	A0A0G2ST79	CO1		GO:0004129	GO_REF:0000003	IEA	EC:1.9.3.1	F	Cytochrome c oxidase subunit 1	CO1	protein	taxon:79674	20180714	UniProt
UniProtKB	A0A0G2ST79	CO1		GO:0005739	GO_REF:0000038	IEA	UniProtKB-KW:KW-0496	C	Cytochrome c oxidase subunit 1	CO1	protein	taxon:79674	20180714	UniProt
UniProtKB	A0A0G2ST79	CO1		GO:0005743	GO_REF:0000038	IEA	UniProtKB-KW:KW-0999	C	Cytochrome c oxidase subunit 1	CO1	protein	taxon:79674	20180714	UniProt
UniProtKB	A0A0G2ST79	CO1		GO:0005743	GO_REF:0000040	IEA	UniProtKB-SubCell:SL-0168	C	Cytochrome c oxidase subunit 1	CO1	protein	taxon:79674	20180714	UniProt
UniProtKB	A0A0G2ST79	CO1		GO:0006119	GO_REF:0000041	IEA	UniPathway:UPA00705	P	Cytochrome c oxidase subunit 1	CO1	protein	taxon:79674	20180714	UniProt
UniProtKB	A0A0G2ST79	CO1		GO:0009060	GO_REF:0000002	IEA	InterPro:IPR000883	P	Cytochrome c oxidase subunit 1	CO1	protein	taxon:79674	20180714	InterPro
UniProtKB	A0A0G2ST79	CO1		GO:0016020	GO_REF:0000038	IEA	UniProtKB-KW:KW-0472	C	Cytochrome c oxidase subunit 1	CO1	protein	taxon:79674	20180714	UniProt
UniProtKB	A0A0G2ST79	CO1		GO:0016021	GO_REF:0000002	IEA	InterPro:IPR000883	C	Cytochrome c oxidase subunit 1	CO1	protein	taxon:79674	20180714	InterPro
UniProtKB	A0A0G2ST79	CO1		GO:0016021	GO_REF:0000038	IEA	UniProtKB-KW:KW-0812	C	Cytochrome c oxidase subunit 1	CO1	protein	taxon:79674	20180714	UniProt
UniProtKB	A0A0G2ST79	CO1		GO:0016491	GO_REF:0000038	IEA	UniProtKB-KW:KW-0560	F	Cytochrome c oxidase subunit 1	CO1	protein	taxon:79674	20180714	UniProt
UniProtKB	A0A0G2ST79	CO1		GO:0020037	GO_REF:0000002	IEA	InterPro:IPR000883	F	Cytochrome c oxidase subunit 1	CO1	protein	taxon:79674	20180714	InterPro
UniProtKB	A0A0G2ST79	CO1		GO:0022900	GO_REF:0000108	IEA	GO:0004129	P	Cytochrome c oxidase subunit 1	CO1	protein	taxon:79674	20180714	GOC
UniProtKB	A0A0G2ST79	CO1		GO:0046872	GO_REF:0000038	IEA	UniProtKB-KW:KW-0479	F	Cytochrome c oxidase subunit 1	CO1	protein	taxon:79674	20180714	UniProt
UniProtKB	A0A0G2ST79	CO1		GO:0055114	GO_REF:0000002	IEA	InterPro:IPR000883|InterPro:IPR023616|InterPro:IPR036927	P	Cytochrome c oxidase subunit 1	CO1	protein	taxon:79674	20180714	InterPro
UniProtKB	A0A0G2ST79	CO1		GO:0055114	GO_REF:0000038	IEA	UniProtKB-KW:KW-0249	P	Cytochrome c oxidase subunit 1	CO1	protein	taxon:79674	20180714	UniProt
UniProtKB	A0A0G2ST79	CO1		GO:0055114	GO_REF:0000038	IEA	UniProtKB-KW:KW-0560	P	Cytochrome c oxidase subunit 1	CO1	protein	taxon:79674	20180714	UniProt
UniProtKB	A0A0G2ST79	CO1		GO:0070469	GO_REF:0000038	IEA	UniProtKB-KW:KW-0679	C	Cytochrome c oxidase subunit 1	CO1	protein	taxon:79674	20180714	UniProt
UniProtKB	A0A0G2ST79	CO1		GO:1902600	GO_REF:0000108	IEA	GO:0004129	P	Cytochrome c oxidase subunit 1	CO1	protein	taxon:79674	20180714	GOC
UniProtKB	A0A0G2ST82	CO1		GO:0004129	GO_REF:0000002	IEA	InterPro:IPR000883|InterPro:IPR023616	F	Cytochrome c oxidase subunit 1	CO1	protein	taxon:79674	20180714	InterPro
UniProtKB	A0A0G2ST82	CO1		GO:0004129	GO_REF:0000003	IEA	EC:1.9.3.1	F	Cytochrome c oxidase subunit 1	CO1	protein	taxon:79674	20180714	UniProt
UniProtKB	A0A0G2ST82	CO1		GO:0005739	GO_REF:0000038	IEA	UniProtKB-KW:KW-0496	C	Cytochrome c oxidase subunit 1	CO1	protein	taxon:79674	20180714	UniProt
UniProtKB	A0A0G2ST82	CO1		GO:0005743	GO_REF:0000038	IEA	UniProtKB-KW:KW-0999	C	Cytochrome c oxidase subunit 1	CO1	protein	taxon:79674	20180714	UniProt
UniProtKB	A0A0G2ST82	CO1		GO:0005743	GO_REF:0000040	IEA	UniProtKB-SubCell:SL-0168	C	Cytochrome c oxidase subunit 1	CO1	protein	taxon:79674	20180714	UniProt
UniProtKB	A0A0G2ST82	CO1		GO:0006119	GO_REF:0000041	IEA	UniPathway:UPA00705	P	Cytochrome c oxidase subunit 1	CO1	protein	taxon:79674	20180714	UniProt
UniProtKB	A0A0G2ST82	CO1		GO:0009060	GO_REF:0000002	IEA	InterPro:IPR000883	P	Cytochrome c oxidase subunit 1	CO1	protein	taxon:79674	20180714	InterPro
UniProtKB	A0A0G2ST82	CO1		GO:0016020	GO_REF:0000038	IEA	UniProtKB-KW:KW-0472	C	Cytochrome c oxidase subunit 1	CO1	protein	taxon:79674	20180714	UniProt
UniProtKB	A0A0G2ST82	CO1		GO:0016021	GO_REF:0000002	IEA	InterPro:IPR000883	C	Cytochrome c oxidase subunit 1	CO1	protein	taxon:79674	20180714	InterPro
UniProtKB	A0A0G2ST82	CO1		GO:0016021	GO_REF:0000038	IEA	UniProtKB-KW:KW-0812	C	Cytochrome c oxidase subunit 1	CO1	protein	taxon:79674	20180714	UniProt
UniProtKB	A0A0G2ST82	CO1		GO:0016491	GO_REF:0000038	IEA	UniProtKB-KW:KW-0560	F	Cytochrome c oxidase subunit 1	CO1	protein	taxon:79674	20180714	UniProt
UniProtKB	A0A0G2ST82	CO1		GO:0020037	GO_REF:0000002	IEA	InterPro:IPR000883	F	Cytochrome c oxidase subunit 1	CO1	protein	taxon:79674	20180714	InterPro
UniProtKB	A0A0G2ST82	CO1		GO:0022900	GO_REF:0000108	IEA	GO:0004129	P	Cytochrome c oxidase subunit 1	CO1	protein	taxon:79674	20180714	GOC
UniProtKB	A0A0G2ST82	CO1		GO:0046872	GO_REF:0000038	IEA	UniProtKB-KW:KW-0479	F	Cytochrome c oxidase subunit 1	CO1	protein	taxon:79674	20180714	UniProt
UniProtKB	A0A0G2ST82	CO1		GO:0055114	GO_REF:0000002	IEA	InterPro:IPR000883|InterPro:IPR023616|InterPro:IPR036927	P	Cytochrome c oxidase subunit 1	CO1	protein	taxon:79674	20180714	InterPro
UniProtKB	A0A0G2ST82	CO1		GO:0055114	GO_REF:0000038	IEA	UniProtKB-KW:KW-0249	P	Cytochrome c oxidase subunit 1	CO1	protein	taxon:79674	20180714	UniProt
UniProtKB	A0A0G2ST82	CO1		GO:0055114	GO_REF:0000038	IEA	UniProtKB-KW:KW-0560	P	Cytochrome c oxidase subunit 1	CO1	protein	taxon:79674	20180714	UniProt
UniProtKB	A0A0G2ST82	CO1		GO:0070469	GO_REF:0000038	IEA	UniProtKB-KW:KW-0679	C	Cytochrome c oxidase subunit 1	CO1	protein	taxon:79674	20180714	UniProt
UniProtKB	A0A0G2ST82	CO1		GO:1902600	GO_REF:0000108	IEA	GO:0004129	P	Cytochrome c oxidase subunit 1	CO1	protein	taxon:79674	20180714	GOC
UniProtKB	A0A0G2ST83	CO1		GO:0004129	GO_REF:0000002	IEA	InterPro:IPR000883|InterPro:IPR023616	F	Cytochrome c oxidase subunit 1	CO1	protein	taxon:79674	20180714	InterPro
UniProtKB	A0A0G2ST83	CO1		GO:0004129	GO_REF:0000003	IEA	EC:1.9.3.1	F	Cytochrome c oxidase subunit 1	CO1	protein	taxon:79674	20180714	UniProt
UniProtKB	A0A0G2ST83	CO1		GO:0005739	GO_REF:0000038	IEA	UniProtKB-KW:KW-0496	C	Cytochrome c oxidase subunit 1	CO1	protein	taxon:79674	20180714	UniProt
UniProtKB	A0A0G2ST83	CO1		GO:0005743	GO_REF:0000038	IEA	UniProtKB-KW:KW-0999	C	Cytochrome c oxidase subunit 1	CO1	protein	taxon:79674	20180714	UniProt
UniProtKB	A0A0G2ST83	CO1		GO:0005743	GO_REF:0000040	IEA	UniProtKB-SubCell:SL-0168	C	Cytochrome c oxidase subunit 1	CO1	protein	taxon:79674	20180714	UniProt
UniProtKB	A0A0G2ST83	CO1		GO:0006119	GO_REF:0000041	IEA	UniPathway:UPA00705	P	Cytochrome c oxidase subunit 1	CO1	protein	taxon:79674	20180714	UniProt
UniProtKB	A0A0G2ST83	CO1		GO:0009060	GO_REF:0000002	IEA	InterPro:IPR000883	P	Cytochrome c oxidase subunit 1	CO1	protein	taxon:79674	20180714	InterPro
UniProtKB	A0A0G2ST83	CO1		GO:0016020	GO_REF:0000038	IEA	UniProtKB-KW:KW-0472	C	Cytochrome c oxidase subunit 1	CO1	protein	taxon:79674	20180714	UniProt
UniProtKB	A0A0G2ST83	CO1		GO:0016021	GO_REF:0000002	IEA	InterPro:IPR000883	C	Cytochrome c oxidase subunit 1	CO1	protein	taxon:79674	20180714	InterPro
UniProtKB	A0A0G2ST83	CO1		GO:0016021	GO_REF:0000038	IEA	UniProtKB-KW:KW-0812	C	Cytochrome c oxidase subunit 1	CO1	protein	taxon:79674	20180714	UniProt
UniProtKB	A0A0G2ST83	CO1		GO:0016491	GO_REF:0000038	IEA	UniProtKB-KW:KW-0560	F	Cytochrome c oxidase subunit 1	CO1	protein	taxon:79674	20180714	UniProt
UniProtKB	A0A0G2ST83	CO1		GO:0020037	GO_REF:0000002	IEA	InterPro:IPR000883	F	Cytochrome c oxidase subunit 1	CO1	protein	taxon:79674	20180714	InterPro
UniProtKB	A0A0G2ST83	CO1		GO:0022900	GO_REF:0000108	IEA	GO:0004129	P	Cytochrome c oxidase subunit 1	CO1	protein	taxon:79674	20180714	GOC
UniProtKB	A0A0G2ST83	CO1		GO:0046872	GO_REF:0000038	IEA	UniProtKB-KW:KW-0479	F	Cytochrome c oxidase subunit 1	CO1	protein	taxon:79674	20180714	UniProt
UniProtKB	A0A0G2ST83	CO1		GO:0055114	GO_REF:0000002	IEA	InterPro:IPR000883|InterPro:IPR023616|InterPro:IPR036927	P	Cytochrome c oxidase subunit 1	CO1	protein	taxon:79674	20180714	InterPro
UniProtKB	A0A0G2ST83	CO1		GO:0055114	GO_REF:0000038	IEA	UniProtKB-KW:KW-0249	P	Cytochrome c oxidase subunit 1	CO1	protein	taxon:79674	20180714	UniProt
UniProtKB	A0A0G2ST83	CO1		GO:0055114	GO_REF:0000038	IEA	UniProtKB-KW:KW-0560	P	Cytochrome c oxidase subunit 1	CO1	protein	taxon:79674	20180714	UniProt
UniProtKB	A0A0G2ST83	CO1		GO:0070469	GO_REF:0000038	IEA	UniProtKB-KW:KW-0679	C	Cytochrome c oxidase subunit 1	CO1	protein	taxon:79674	20180714	UniProt
UniProtKB	A0A0G2ST83	CO1		GO:1902600	GO_REF:0000108	IEA	GO:0004129	P	Cytochrome c oxidase subunit 1	CO1	protein	taxon:79674	20180714	GOC
UniProtKB	A0A0G2ST84	CO1		GO:0004129	GO_REF:0000002	IEA	InterPro:IPR000883|InterPro:IPR023616	F	Cytochrome c oxidase subunit 1	CO1	protein	taxon:79674	20180714	InterPro
UniProtKB	A0A0G2ST84	CO1		GO:0004129	GO_REF:0000003	IEA	EC:1.9.3.1	F	Cytochrome c oxidase subunit 1	CO1	protein	taxon:79674	20180714	UniProt
UniProtKB	A0A0G2ST84	CO1		GO:0005739	GO_REF:0000038	IEA	UniProtKB-KW:KW-0496	C	Cytochrome c oxidase subunit 1	CO1	protein	taxon:79674	20180714	UniProt
UniProtKB	A0A0G2ST84	CO1		GO:0005743	GO_REF:0000038	IEA	UniProtKB-KW:KW-0999	C	Cytochrome c oxidase subunit 1	CO1	protein	taxon:79674	20180714	UniProt
UniProtKB	A0A0G2ST84	CO1		GO:0005743	GO_REF:0000040	IEA	UniProtKB-SubCell:SL-0168	C	Cytochrome c oxidase subunit 1	CO1	protein	taxon:79674	20180714	UniProt
UniProtKB	A0A0G2ST84	CO1		GO:0006119	GO_REF:0000041	IEA	UniPathway:UPA00705	P	Cytochrome c oxidase subunit 1	CO1	protein	taxon:79674	20180714	UniProt
UniProtKB	A0A0G2ST84	CO1		GO:0009060	GO_REF:0000002	IEA	InterPro:IPR000883	P	Cytochrome c oxidase subunit 1	CO1	protein	taxon:79674	20180714	InterPro
UniProtKB	A0A0G2ST84	CO1		GO:0016020	GO_REF:0000038	IEA	UniProtKB-KW:KW-0472	C	Cytochrome c oxidase subunit 1	CO1	protein	taxon:79674	20180714	UniProt
UniProtKB	A0A0G2ST84	CO1		GO:0016021	GO_REF:0000002	IEA	InterPro:IPR000883	C	Cytochrome c oxidase subunit 1	CO1	protein	taxon:79674	20180714	InterPro
UniProtKB	A0A0G2ST84	CO1		GO:0016021	GO_REF:0000038	IEA	UniProtKB-KW:KW-0812	C	Cytochrome c oxidase subunit 1	CO1	protein	taxon:79674	20180714	UniProt
UniProtKB	A0A0G2ST84	CO1		GO:0016491	GO_REF:0000038	IEA	UniProtKB-KW:KW-0560	F	Cytochrome c oxidase subunit 1	CO1	protein	taxon:79674	20180714	UniProt
UniProtKB	A0A0G2ST84	CO1		GO:0020037	GO_REF:0000002	IEA	InterPro:IPR000883	F	Cytochrome c oxidase subunit 1	CO1	protein	taxon:79674	20180714	InterPro
UniProtKB	A0A0G2ST84	CO1		GO:0022900	GO_REF:0000108	IEA	GO:0004129	P	Cytochrome c oxidase subunit 1	CO1	protein	taxon:79674	20180714	GOC
UniProtKB	A0A0G2ST84	CO1		GO:0046872	GO_REF:0000038	IEA	UniProtKB-KW:KW-0479	F	Cytochrome c oxidase subunit 1	CO1	protein	taxon:79674	20180714	UniProt
UniProtKB	A0A0G2ST84	CO1		GO:0055114	GO_REF:0000002	IEA	InterPro:IPR000883|InterPro:IPR023616|InterPro:IPR036927	P	Cytochrome c oxidase subunit 1	CO1	protein	taxon:79674	20180714	InterPro
UniProtKB	A0A0G2ST84	CO1		GO:0055114	GO_REF:0000038	IEA	UniProtKB-KW:KW-0249	P	Cytochrome c oxidase subunit 1	CO1	protein	taxon:79674	20180714	UniProt
UniProtKB	A0A0G2ST84	CO1		GO:0055114	GO_REF:0000038	IEA	UniProtKB-KW:KW-0560	P	Cytochrome c oxidase subunit 1	CO1	protein	taxon:79674	20180714	UniProt
UniProtKB	A0A0G2ST84	CO1		GO:0070469	GO_REF:0000038	IEA	UniProtKB-KW:KW-0679	C	Cytochrome c oxidase subunit 1	CO1	protein	taxon:79674	20180714	UniProt
UniProtKB	A0A0G2ST84	CO1		GO:1902600	GO_REF:0000108	IEA	GO:0004129	P	Cytochrome c oxidase subunit 1	CO1	protein	taxon:79674	20180714	GOC
UniProtKB	A0A0G2ST85	CO1		GO:0004129	GO_REF:0000002	IEA	InterPro:IPR000883|InterPro:IPR023616	F	Cytochrome c oxidase subunit 1	CO1	protein	taxon:79674	20180714	InterPro
UniProtKB	A0A0G2ST85	CO1		GO:0004129	GO_REF:0000003	IEA	EC:1.9.3.1	F	Cytochrome c oxidase subunit 1	CO1	protein	taxon:79674	20180714	UniProt
UniProtKB	A0A0G2ST85	CO1		GO:0005739	GO_REF:0000038	IEA	UniProtKB-KW:KW-0496	C	Cytochrome c oxidase subunit 1	CO1	protein	taxon:79674	20180714	UniProt
UniProtKB	A0A0G2ST85	CO1		GO:0005743	GO_REF:0000038	IEA	UniProtKB-KW:KW-0999	C	Cytochrome c oxidase subunit 1	CO1	protein	taxon:79674	20180714	UniProt
UniProtKB	A0A0G2ST85	CO1		GO:0005743	GO_REF:0000040	IEA	UniProtKB-SubCell:SL-0168	C	Cytochrome c oxidase subunit 1	CO1	protein	taxon:79674	20180714	UniProt
UniProtKB	A0A0G2ST85	CO1		GO:0006119	GO_REF:0000041	IEA	UniPathway:UPA00705	P	Cytochrome c oxidase subunit 1	CO1	protein	taxon:79674	20180714	UniProt
UniProtKB	A0A0G2ST85	CO1		GO:0009060	GO_REF:0000002	IEA	InterPro:IPR000883	P	Cytochrome c oxidase subunit 1	CO1	protein	taxon:79674	20180714	InterPro
UniProtKB	A0A0G2ST85	CO1		GO:0016020	GO_REF:0000038	IEA	UniProtKB-KW:KW-0472	C	Cytochrome c oxidase subunit 1	CO1	protein	taxon:79674	20180714	UniProt
UniProtKB	A0A0G2ST85	CO1		GO:0016021	GO_REF:0000002	IEA	InterPro:IPR000883	C	Cytochrome c oxidase subunit 1	CO1	protein	taxon:79674	20180714	InterPro
UniProtKB	A0A0G2ST85	CO1		GO:0016021	GO_REF:0000038	IEA	UniProtKB-KW:KW-0812	C	Cytochrome c oxidase subunit 1	CO1	protein	taxon:79674	20180714	UniProt
UniProtKB	A0A0G2ST85	CO1		GO:0016491	GO_REF:0000038	IEA	UniProtKB-KW:KW-0560	F	Cytochrome c oxidase subunit 1	CO1	protein	taxon:79674	20180714	UniProt
UniProtKB	A0A0G2ST85	CO1		GO:0020037	GO_REF:0000002	IEA	InterPro:IPR000883	F	Cytochrome c oxidase subunit 1	CO1	protein	taxon:79674	20180714	InterPro
UniProtKB	A0A0G2ST85	CO1		GO:0022900	GO_REF:0000108	IEA	GO:0004129	P	Cytochrome c oxidase subunit 1	CO1	protein	taxon:79674	20180714	GOC
UniProtKB	A0A0G2ST85	CO1		GO:0046872	GO_REF:0000038	IEA	UniProtKB-KW:KW-0479	F	Cytochrome c oxidase subunit 1	CO1	protein	taxon:79674	20180714	UniProt
UniProtKB	A0A0G2ST85	CO1		GO:0055114	GO_REF:0000002	IEA	InterPro:IPR000883|InterPro:IPR023616|InterPro:IPR036927	P	Cytochrome c oxidase subunit 1	CO1	protein	taxon:79674	20180714	InterPro
UniProtKB	A0A0G2ST85	CO1		GO:0055114	GO_REF:0000038	IEA	UniProtKB-KW:KW-0249	P	Cytochrome c oxidase subunit 1	CO1	protein	taxon:79674	20180714	UniProt
UniProtKB	A0A0G2ST85	CO1		GO:0055114	GO_REF:0000038	IEA	UniProtKB-KW:KW-0560	P	Cytochrome c oxidase subunit 1	CO1	protein	taxon:79674	20180714	UniProt
UniProtKB	A0A0G2ST85	CO1		GO:0070469	GO_REF:0000038	IEA	UniProtKB-KW:KW-0679	C	Cytochrome c oxidase subunit 1	CO1	protein	taxon:79674	20180714	UniProt
UniProtKB	A0A0G2ST85	CO1		GO:1902600	GO_REF:0000108	IEA	GO:0004129	P	Cytochrome c oxidase subunit 1	CO1	protein	taxon:79674	20180714	GOC
UniProtKB	A0A0G2ST86	CO1		GO:0004129	GO_REF:0000002	IEA	InterPro:IPR000883|InterPro:IPR023616	F	Cytochrome c oxidase subunit 1	CO1	protein	taxon:79674	20180714	InterPro
UniProtKB	A0A0G2ST86	CO1		GO:0004129	GO_REF:0000003	IEA	EC:1.9.3.1	F	Cytochrome c oxidase subunit 1	CO1	protein	taxon:79674	20180714	UniProt
UniProtKB	A0A0G2ST86	CO1		GO:0005739	GO_REF:0000038	IEA	UniProtKB-KW:KW-0496	C	Cytochrome c oxidase subunit 1	CO1	protein	taxon:79674	20180714	UniProt
UniProtKB	A0A0G2ST86	CO1		GO:0005743	GO_REF:0000038	IEA	UniProtKB-KW:KW-0999	C	Cytochrome c oxidase subunit 1	CO1	protein	taxon:79674	20180714	UniProt
UniProtKB	A0A0G2ST86	CO1		GO:0005743	GO_REF:0000040	IEA	UniProtKB-SubCell:SL-0168	C	Cytochrome c oxidase subunit 1	CO1	protein	taxon:79674	20180714	UniProt
UniProtKB	A0A0G2ST86	CO1		GO:0006119	GO_REF:0000041	IEA	UniPathway:UPA00705	P	Cytochrome c oxidase subunit 1	CO1	protein	taxon:79674	20180714	UniProt
UniProtKB	A0A0G2ST86	CO1		GO:0009060	GO_REF:0000002	IEA	InterPro:IPR000883	P	Cytochrome c oxidase subunit 1	CO1	protein	taxon:79674	20180714	InterPro
UniProtKB	A0A0G2ST86	CO1		GO:0016020	GO_REF:0000038	IEA	UniProtKB-KW:KW-0472	C	Cytochrome c oxidase subunit 1	CO1	protein	taxon:79674	20180714	UniProt
UniProtKB	A0A0G2ST86	CO1		GO:0016021	GO_REF:0000002	IEA	InterPro:IPR000883	C	Cytochrome c oxidase subunit 1	CO1	protein	taxon:79674	20180714	InterPro
UniProtKB	A0A0G2ST86	CO1		GO:0016021	GO_REF:0000038	IEA	UniProtKB-KW:KW-0812	C	Cytochrome c oxidase subunit 1	CO1	protein	taxon:79674	20180714	UniProt
UniProtKB	A0A0G2ST86	CO1		GO:0016491	GO_REF:0000038	IEA	UniProtKB-KW:KW-0560	F	Cytochrome c oxidase subunit 1	CO1	protein	taxon:79674	20180714	UniProt
UniProtKB	A0A0G2ST86	CO1		GO:0020037	GO_REF:0000002	IEA	InterPro:IPR000883	F	Cytochrome c oxidase subunit 1	CO1	protein	taxon:79674	20180714	InterPro
UniProtKB	A0A0G2ST86	CO1		GO:0022900	GO_REF:0000108	IEA	GO:0004129	P	Cytochrome c oxidase subunit 1	CO1	protein	taxon:79674	20180714	GOC
UniProtKB	A0A0G2ST86	CO1		GO:0046872	GO_REF:0000038	IEA	UniProtKB-KW:KW-0479	F	Cytochrome c oxidase subunit 1	CO1	protein	taxon:79674	20180714	UniProt
UniProtKB	A0A0G2ST86	CO1		GO:0055114	GO_REF:0000002	IEA	InterPro:IPR000883|InterPro:IPR023616|InterPro:IPR036927	P	Cytochrome c oxidase subunit 1	CO1	protein	taxon:79674	20180714	InterPro
UniProtKB	A0A0G2ST86	CO1		GO:0055114	GO_REF:0000038	IEA	UniProtKB-KW:KW-0249	P	Cytochrome c oxidase subunit 1	CO1	protein	taxon:79674	20180714	UniProt
UniProtKB	A0A0G2ST86	CO1		GO:0055114	GO_REF:0000038	IEA	UniProtKB-KW:KW-0560	P	Cytochrome c oxidase subunit 1	CO1	protein	taxon:79674	20180714	UniProt
UniProtKB	A0A0G2ST86	CO1		GO:0070469	GO_REF:0000038	IEA	UniProtKB-KW:KW-0679	C	Cytochrome c oxidase subunit 1	CO1	protein	taxon:79674	20180714	UniProt
UniProtKB	A0A0G2ST86	CO1		GO:1902600	GO_REF:0000108	IEA	GO:0004129	P	Cytochrome c oxidase subunit 1	CO1	protein	taxon:79674	20180714	GOC
UniProtKB	A0A0G2ST89	CO1		GO:0004129	GO_REF:0000002	IEA	InterPro:IPR000883|InterPro:IPR023616	F	Cytochrome c oxidase subunit 1	CO1	protein	taxon:79674	20180714	InterPro
UniProtKB	A0A0G2ST89	CO1		GO:0004129	GO_REF:0000003	IEA	EC:1.9.3.1	F	Cytochrome c oxidase subunit 1	CO1	protein	taxon:79674	20180714	UniProt
UniProtKB	A0A0G2ST89	CO1		GO:0005739	GO_REF:0000038	IEA	UniProtKB-KW:KW-0496	C	Cytochrome c oxidase subunit 1	CO1	protein	taxon:79674	20180714	UniProt
UniProtKB	A0A0G2ST89	CO1		GO:0005743	GO_REF:0000038	IEA	UniProtKB-KW:KW-0999	C	Cytochrome c oxidase subunit 1	CO1	protein	taxon:79674	20180714	UniProt
UniProtKB	A0A0G2ST89	CO1		GO:0005743	GO_REF:0000040	IEA	UniProtKB-SubCell:SL-0168	C	Cytochrome c oxidase subunit 1	CO1	protein	taxon:79674	20180714	UniProt
UniProtKB	A0A0G2ST89	CO1		GO:0006119	GO_REF:0000041	IEA	UniPathway:UPA00705	P	Cytochrome c oxidase subunit 1	CO1	protein	taxon:79674	20180714	UniProt
UniProtKB	A0A0G2ST89	CO1		GO:0009060	GO_REF:0000002	IEA	InterPro:IPR000883	P	Cytochrome c oxidase subunit 1	CO1	protein	taxon:79674	20180714	InterPro
UniProtKB	A0A0G2ST89	CO1		GO:0016020	GO_REF:0000038	IEA	UniProtKB-KW:KW-0472	C	Cytochrome c oxidase subunit 1	CO1	protein	taxon:79674	20180714	UniProt
UniProtKB	A0A0G2ST89	CO1		GO:0016021	GO_REF:0000002	IEA	InterPro:IPR000883	C	Cytochrome c oxidase subunit 1	CO1	protein	taxon:79674	20180714	InterPro
UniProtKB	A0A0G2ST89	CO1		GO:0016021	GO_REF:0000038	IEA	UniProtKB-KW:KW-0812	C	Cytochrome c oxidase subunit 1	CO1	protein	taxon:79674	20180714	UniProt
UniProtKB	A0A0G2ST89	CO1		GO:0016491	GO_REF:0000038	IEA	UniProtKB-KW:KW-0560	F	Cytochrome c oxidase subunit 1	CO1	protein	taxon:79674	20180714	UniProt
UniProtKB	A0A0G2ST89	CO1		GO:0020037	GO_REF:0000002	IEA	InterPro:IPR000883	F	Cytochrome c oxidase subunit 1	CO1	protein	taxon:79674	20180714	InterPro
UniProtKB	A0A0G2ST89	CO1		GO:0022900	GO_REF:0000108	IEA	GO:0004129	P	Cytochrome c oxidase subunit 1	CO1	protein	taxon:79674	20180714	GOC
UniProtKB	A0A0G2ST89	CO1		GO:0046872	GO_REF:0000038	IEA	UniProtKB-KW:KW-0479	F	Cytochrome c oxidase subunit 1	CO1	protein	taxon:79674	20180714	UniProt
UniProtKB	A0A0G2ST89	CO1		GO:0055114	GO_REF:0000002	IEA	InterPro:IPR000883|InterPro:IPR023616|InterPro:IPR036927	P	Cytochrome c oxidase subunit 1	CO1	protein	taxon:79674	20180714	InterPro
UniProtKB	A0A0G2ST89	CO1		GO:0055114	GO_REF:0000038	IEA	UniProtKB-KW:KW-0249	P	Cytochrome c oxidase subunit 1	CO1	protein	taxon:79674	20180714	UniProt
UniProtKB	A0A0G2ST89	CO1		GO:0055114	GO_REF:0000038	IEA	UniProtKB-KW:KW-0560	P	Cytochrome c oxidase subunit 1	CO1	protein	taxon:79674	20180714	UniProt
UniProtKB	A0A0G2ST89	CO1		GO:0070469	GO_REF:0000038	IEA	UniProtKB-KW:KW-0679	C	Cytochrome c oxidase subunit 1	CO1	protein	taxon:79674	20180714	UniProt
UniProtKB	A0A0G2ST89	CO1		GO:1902600	GO_REF:0000108	IEA	GO:0004129	P	Cytochrome c oxidase subunit 1	CO1	protein	taxon:79674	20180714	GOC
UniProtKB	A0A0G2STB5	CO1		GO:0004129	GO_REF:0000002	IEA	InterPro:IPR000883|InterPro:IPR023616	F	Cytochrome c oxidase subunit 1	CO1	protein	taxon:79674	20180714	InterPro
UniProtKB	A0A0G2STB5	CO1		GO:0004129	GO_REF:0000003	IEA	EC:1.9.3.1	F	Cytochrome c oxidase subunit 1	CO1	protein	taxon:79674	20180714	UniProt
UniProtKB	A0A0G2STB5	CO1		GO:0005739	GO_REF:0000038	IEA	UniProtKB-KW:KW-0496	C	Cytochrome c oxidase subunit 1	CO1	protein	taxon:79674	20180714	UniProt
UniProtKB	A0A0G2STB5	CO1		GO:0005743	GO_REF:0000038	IEA	UniProtKB-KW:KW-0999	C	Cytochrome c oxidase subunit 1	CO1	protein	taxon:79674	20180714	UniProt
UniProtKB	A0A0G2STB5	CO1		GO:0005743	GO_REF:0000040	IEA	UniProtKB-SubCell:SL-0168	C	Cytochrome c oxidase subunit 1	CO1	protein	taxon:79674	20180714	UniProt
UniProtKB	A0A0G2STB5	CO1		GO:0006119	GO_REF:0000041	IEA	UniPathway:UPA00705	P	Cytochrome c oxidase subunit 1	CO1	protein	taxon:79674	20180714	UniProt
UniProtKB	A0A0G2STB5	CO1		GO:0009060	GO_REF:0000002	IEA	InterPro:IPR000883	P	Cytochrome c oxidase subunit 1	CO1	protein	taxon:79674	20180714	InterPro
UniProtKB	A0A0G2STB5	CO1		GO:0016020	GO_REF:0000038	IEA	UniProtKB-KW:KW-0472	C	Cytochrome c oxidase subunit 1	CO1	protein	taxon:79674	20180714	UniProt
UniProtKB	A0A0G2STB5	CO1		GO:0016021	GO_REF:0000002	IEA	InterPro:IPR000883	C	Cytochrome c oxidase subunit 1	CO1	protein	taxon:79674	20180714	InterPro
UniProtKB	A0A0G2STB5	CO1		GO:0016021	GO_REF:0000038	IEA	UniProtKB-KW:KW-0812	C	Cytochrome c oxidase subunit 1	CO1	protein	taxon:79674	20180714	UniProt
UniProtKB	A0A0G2STB5	CO1		GO:0016491	GO_REF:0000038	IEA	UniProtKB-KW:KW-0560	F	Cytochrome c oxidase subunit 1	CO1	protein	taxon:79674	20180714	UniProt
UniProtKB	A0A0G2STB5	CO1		GO:0020037	GO_REF:0000002	IEA	InterPro:IPR000883	F	Cytochrome c oxidase subunit 1	CO1	protein	taxon:79674	20180714	InterPro
UniProtKB	A0A0G2STB5	CO1		GO:0022900	GO_REF:0000108	IEA	GO:0004129	P	Cytochrome c oxidase subunit 1	CO1	protein	taxon:79674	20180714	GOC
UniProtKB	A0A0G2STB5	CO1		GO:0046872	GO_REF:0000038	IEA	UniProtKB-KW:KW-0479	F	Cytochrome c oxidase subunit 1	CO1	protein	taxon:79674	20180714	UniProt
UniProtKB	A0A0G2STB5	CO1		GO:0055114	GO_REF:0000002	IEA	InterPro:IPR000883|InterPro:IPR023616|InterPro:IPR036927	P	Cytochrome c oxidase subunit 1	CO1	protein	taxon:79674	20180714	InterPro
UniProtKB	A0A0G2STB5	CO1		GO:0055114	GO_REF:0000038	IEA	UniProtKB-KW:KW-0249	P	Cytochrome c oxidase subunit 1	CO1	protein	taxon:79674	20180714	UniProt
UniProtKB	A0A0G2STB5	CO1		GO:0055114	GO_REF:0000038	IEA	UniProtKB-KW:KW-0560	P	Cytochrome c oxidase subunit 1	CO1	protein	taxon:79674	20180714	UniProt
UniProtKB	A0A0G2STB5	CO1		GO:0070469	GO_REF:0000038	IEA	UniProtKB-KW:KW-0679	C	Cytochrome c oxidase subunit 1	CO1	protein	taxon:79674	20180714	UniProt
UniProtKB	A0A0G2STB5	CO1		GO:1902600	GO_REF:0000108	IEA	GO:0004129	P	Cytochrome c oxidase subunit 1	CO1	protein	taxon:79674	20180714	GOC
UniProtKB	A0A0G2STB6	CO1		GO:0004129	GO_REF:0000002	IEA	InterPro:IPR000883|InterPro:IPR023616	F	Cytochrome c oxidase subunit 1	CO1	protein	taxon:79674	20180714	InterPro
UniProtKB	A0A0G2STB6	CO1		GO:0004129	GO_REF:0000003	IEA	EC:1.9.3.1	F	Cytochrome c oxidase subunit 1	CO1	protein	taxon:79674	20180714	UniProt
UniProtKB	A0A0G2STB6	CO1		GO:0005739	GO_REF:0000038	IEA	UniProtKB-KW:KW-0496	C	Cytochrome c oxidase subunit 1	CO1	protein	taxon:79674	20180714	UniProt
UniProtKB	A0A0G2STB6	CO1		GO:0005743	GO_REF:0000038	IEA	UniProtKB-KW:KW-0999	C	Cytochrome c oxidase subunit 1	CO1	protein	taxon:79674	20180714	UniProt
UniProtKB	A0A0G2STB6	CO1		GO:0005743	GO_REF:0000040	IEA	UniProtKB-SubCell:SL-0168	C	Cytochrome c oxidase subunit 1	CO1	protein	taxon:79674	20180714	UniProt
UniProtKB	A0A0G2STB6	CO1		GO:0006119	GO_REF:0000041	IEA	UniPathway:UPA00705	P	Cytochrome c oxidase subunit 1	CO1	protein	taxon:79674	20180714	UniProt
UniProtKB	A0A0G2STB6	CO1		GO:0009060	GO_REF:0000002	IEA	InterPro:IPR000883	P	Cytochrome c oxidase subunit 1	CO1	protein	taxon:79674	20180714	InterPro
UniProtKB	A0A0G2STB6	CO1		GO:0016020	GO_REF:0000038	IEA	UniProtKB-KW:KW-0472	C	Cytochrome c oxidase subunit 1	CO1	protein	taxon:79674	20180714	UniProt
UniProtKB	A0A0G2STB6	CO1		GO:0016021	GO_REF:0000002	IEA	InterPro:IPR000883	C	Cytochrome c oxidase subunit 1	CO1	protein	taxon:79674	20180714	InterPro
UniProtKB	A0A0G2STB6	CO1		GO:0016021	GO_REF:0000038	IEA	UniProtKB-KW:KW-0812	C	Cytochrome c oxidase subunit 1	CO1	protein	taxon:79674	20180714	UniProt
UniProtKB	A0A0G2STB6	CO1		GO:0016491	GO_REF:0000038	IEA	UniProtKB-KW:KW-0560	F	Cytochrome c oxidase subunit 1	CO1	protein	taxon:79674	20180714	UniProt
UniProtKB	A0A0G2STB6	CO1		GO:0020037	GO_REF:0000002	IEA	InterPro:IPR000883	F	Cytochrome c oxidase subunit 1	CO1	protein	taxon:79674	20180714	InterPro
UniProtKB	A0A0G2STB6	CO1		GO:0022900	GO_REF:0000108	IEA	GO:0004129	P	Cytochrome c oxidase subunit 1	CO1	protein	taxon:79674	20180714	GOC
UniProtKB	A0A0G2STB6	CO1		GO:0046872	GO_REF:0000038	IEA	UniProtKB-KW:KW-0479	F	Cytochrome c oxidase subunit 1	CO1	protein	taxon:79674	20180714	UniProt
UniProtKB	A0A0G2STB6	CO1		GO:0055114	GO_REF:0000002	IEA	InterPro:IPR000883|InterPro:IPR023616|InterPro:IPR036927	P	Cytochrome c oxidase subunit 1	CO1	protein	taxon:79674	20180714	InterPro
UniProtKB	A0A0G2STB6	CO1		GO:0055114	GO_REF:0000038	IEA	UniProtKB-KW:KW-0249	P	Cytochrome c oxidase subunit 1	CO1	protein	taxon:79674	20180714	UniProt
UniProtKB	A0A0G2STB6	CO1		GO:0055114	GO_REF:0000038	IEA	UniProtKB-KW:KW-0560	P	Cytochrome c oxidase subunit 1	CO1	protein	taxon:79674	20180714	UniProt
UniProtKB	A0A0G2STB6	CO1		GO:0070469	GO_REF:0000038	IEA	UniProtKB-KW:KW-0679	C	Cytochrome c oxidase subunit 1	CO1	protein	taxon:79674	20180714	UniProt
UniProtKB	A0A0G2STB6	CO1		GO:1902600	GO_REF:0000108	IEA	GO:0004129	P	Cytochrome c oxidase subunit 1	CO1	protein	taxon:79674	20180714	GOC
UniProtKB	A0A0G2STB7	CO1		GO:0004129	GO_REF:0000002	IEA	InterPro:IPR000883|InterPro:IPR023616	F	Cytochrome c oxidase subunit 1	CO1	protein	taxon:79674	20180714	InterPro
UniProtKB	A0A0G2STB7	CO1		GO:0004129	GO_REF:0000003	IEA	EC:1.9.3.1	F	Cytochrome c oxidase subunit 1	CO1	protein	taxon:79674	20180714	UniProt
UniProtKB	A0A0G2STB7	CO1		GO:0005739	GO_REF:0000038	IEA	UniProtKB-KW:KW-0496	C	Cytochrome c oxidase subunit 1	CO1	protein	taxon:79674	20180714	UniProt
UniProtKB	A0A0G2STB7	CO1		GO:0005743	GO_REF:0000038	IEA	UniProtKB-KW:KW-0999	C	Cytochrome c oxidase subunit 1	CO1	protein	taxon:79674	20180714	UniProt
UniProtKB	A0A0G2STB7	CO1		GO:0005743	GO_REF:0000040	IEA	UniProtKB-SubCell:SL-0168	C	Cytochrome c oxidase subunit 1	CO1	protein	taxon:79674	20180714	UniProt
UniProtKB	A0A0G2STB7	CO1		GO:0006119	GO_REF:0000041	IEA	UniPathway:UPA00705	P	Cytochrome c oxidase subunit 1	CO1	protein	taxon:79674	20180714	UniProt
UniProtKB	A0A0G2STB7	CO1		GO:0009060	GO_REF:0000002	IEA	InterPro:IPR000883	P	Cytochrome c oxidase subunit 1	CO1	protein	taxon:79674	20180714	InterPro
UniProtKB	A0A0G2STB7	CO1		GO:0016020	GO_REF:0000038	IEA	UniProtKB-KW:KW-0472	C	Cytochrome c oxidase subunit 1	CO1	protein	taxon:79674	20180714	UniProt
UniProtKB	A0A0G2STB7	CO1		GO:0016021	GO_REF:0000002	IEA	InterPro:IPR000883	C	Cytochrome c oxidase subunit 1	CO1	protein	taxon:79674	20180714	InterPro
UniProtKB	A0A0G2STB7	CO1		GO:0016021	GO_REF:0000038	IEA	UniProtKB-KW:KW-0812	C	Cytochrome c oxidase subunit 1	CO1	protein	taxon:79674	20180714	UniProt
UniProtKB	A0A0G2STB7	CO1		GO:0016491	GO_REF:0000038	IEA	UniProtKB-KW:KW-0560	F	Cytochrome c oxidase subunit 1	CO1	protein	taxon:79674	20180714	UniProt
UniProtKB	A0A0G2STB7	CO1		GO:0020037	GO_REF:0000002	IEA	InterPro:IPR000883	F	Cytochrome c oxidase subunit 1	CO1	protein	taxon:79674	20180714	InterPro
UniProtKB	A0A0G2STB7	CO1		GO:0022900	GO_REF:0000108	IEA	GO:0004129	P	Cytochrome c oxidase subunit 1	CO1	protein	taxon:79674	20180714	GOC
UniProtKB	A0A0G2STB7	CO1		GO:0046872	GO_REF:0000038	IEA	UniProtKB-KW:KW-0479	F	Cytochrome c oxidase subunit 1	CO1	protein	taxon:79674	20180714	UniProt
UniProtKB	A0A0G2STB7	CO1		GO:0055114	GO_REF:0000002	IEA	InterPro:IPR000883|InterPro:IPR023616|InterPro:IPR036927	P	Cytochrome c oxidase subunit 1	CO1	protein	taxon:79674	20180714	InterPro
UniProtKB	A0A0G2STB7	CO1		GO:0055114	GO_REF:0000038	IEA	UniProtKB-KW:KW-0249	P	Cytochrome c oxidase subunit 1	CO1	protein	taxon:79674	20180714	UniProt
UniProtKB	A0A0G2STB7	CO1		GO:0055114	GO_REF:0000038	IEA	UniProtKB-KW:KW-0560	P	Cytochrome c oxidase subunit 1	CO1	protein	taxon:79674	20180714	UniProt
UniProtKB	A0A0G2STB7	CO1		GO:0070469	GO_REF:0000038	IEA	UniProtKB-KW:KW-0679	C	Cytochrome c oxidase subunit 1	CO1	protein	taxon:79674	20180714	UniProt
UniProtKB	A0A0G2STB7	CO1		GO:1902600	GO_REF:0000108	IEA	GO:0004129	P	Cytochrome c oxidase subunit 1	CO1	protein	taxon:79674	20180714	GOC
UniProtKB	A0A0G2STB8	CO1		GO:0004129	GO_REF:0000002	IEA	InterPro:IPR000883|InterPro:IPR023616	F	Cytochrome c oxidase subunit 1	CO1	protein	taxon:79674	20180714	InterPro
UniProtKB	A0A0G2STB8	CO1		GO:0004129	GO_REF:0000003	IEA	EC:1.9.3.1	F	Cytochrome c oxidase subunit 1	CO1	protein	taxon:79674	20180714	UniProt
UniProtKB	A0A0G2STB8	CO1		GO:0005739	GO_REF:0000038	IEA	UniProtKB-KW:KW-0496	C	Cytochrome c oxidase subunit 1	CO1	protein	taxon:79674	20180714	UniProt
UniProtKB	A0A0G2STB8	CO1		GO:0005743	GO_REF:0000038	IEA	UniProtKB-KW:KW-0999	C	Cytochrome c oxidase subunit 1	CO1	protein	taxon:79674	20180714	UniProt
UniProtKB	A0A0G2STB8	CO1		GO:0005743	GO_REF:0000040	IEA	UniProtKB-SubCell:SL-0168	C	Cytochrome c oxidase subunit 1	CO1	protein	taxon:79674	20180714	UniProt
UniProtKB	A0A0G2STB8	CO1		GO:0006119	GO_REF:0000041	IEA	UniPathway:UPA00705	P	Cytochrome c oxidase subunit 1	CO1	protein	taxon:79674	20180714	UniProt
UniProtKB	A0A0G2STB8	CO1		GO:0009060	GO_REF:0000002	IEA	InterPro:IPR000883	P	Cytochrome c oxidase subunit 1	CO1	protein	taxon:79674	20180714	InterPro
UniProtKB	A0A0G2STB8	CO1		GO:0016020	GO_REF:0000038	IEA	UniProtKB-KW:KW-0472	C	Cytochrome c oxidase subunit 1	CO1	protein	taxon:79674	20180714	UniProt
UniProtKB	A0A0G2STB8	CO1		GO:0016021	GO_REF:0000002	IEA	InterPro:IPR000883	C	Cytochrome c oxidase subunit 1	CO1	protein	taxon:79674	20180714	InterPro
UniProtKB	A0A0G2STB8	CO1		GO:0016021	GO_REF:0000038	IEA	UniProtKB-KW:KW-0812	C	Cytochrome c oxidase subunit 1	CO1	protein	taxon:79674	20180714	UniProt
UniProtKB	A0A0G2STB8	CO1		GO:0016491	GO_REF:0000038	IEA	UniProtKB-KW:KW-0560	F	Cytochrome c oxidase subunit 1	CO1	protein	taxon:79674	20180714	UniProt
UniProtKB	A0A0G2STB8	CO1		GO:0020037	GO_REF:0000002	IEA	InterPro:IPR000883	F	Cytochrome c oxidase subunit 1	CO1	protein	taxon:79674	20180714	InterPro
UniProtKB	A0A0G2STB8	CO1		GO:0022900	GO_REF:0000108	IEA	GO:0004129	P	Cytochrome c oxidase subunit 1	CO1	protein	taxon:79674	20180714	GOC
UniProtKB	A0A0G2STB8	CO1		GO:0046872	GO_REF:0000038	IEA	UniProtKB-KW:KW-0479	F	Cytochrome c oxidase subunit 1	CO1	protein	taxon:79674	20180714	UniProt
UniProtKB	A0A0G2STB8	CO1		GO:0055114	GO_REF:0000002	IEA	InterPro:IPR000883|InterPro:IPR023616|InterPro:IPR036927	P	Cytochrome c oxidase subunit 1	CO1	protein	taxon:79674	20180714	InterPro
UniProtKB	A0A0G2STB8	CO1		GO:0055114	GO_REF:0000038	IEA	UniProtKB-KW:KW-0249	P	Cytochrome c oxidase subunit 1	CO1	protein	taxon:79674	20180714	UniProt
UniProtKB	A0A0G2STB8	CO1		GO:0055114	GO_REF:0000038	IEA	UniProtKB-KW:KW-0560	P	Cytochrome c oxidase subunit 1	CO1	protein	taxon:79674	20180714	UniProt
UniProtKB	A0A0G2STB8	CO1		GO:0070469	GO_REF:0000038	IEA	UniProtKB-KW:KW-0679	C	Cytochrome c oxidase subunit 1	CO1	protein	taxon:79674	20180714	UniProt
UniProtKB	A0A0G2STB8	CO1		GO:1902600	GO_REF:0000108	IEA	GO:0004129	P	Cytochrome c oxidase subunit 1	CO1	protein	taxon:79674	20180714	GOC
UniProtKB	A0A0G2STB9	CO1		GO:0004129	GO_REF:0000002	IEA	InterPro:IPR000883|InterPro:IPR023616	F	Cytochrome c oxidase subunit 1	CO1	protein	taxon:79674	20180714	InterPro
UniProtKB	A0A0G2STB9	CO1		GO:0004129	GO_REF:0000003	IEA	EC:1.9.3.1	F	Cytochrome c oxidase subunit 1	CO1	protein	taxon:79674	20180714	UniProt
UniProtKB	A0A0G2STB9	CO1		GO:0005739	GO_REF:0000038	IEA	UniProtKB-KW:KW-0496	C	Cytochrome c oxidase subunit 1	CO1	protein	taxon:79674	20180714	UniProt
UniProtKB	A0A0G2STB9	CO1		GO:0005743	GO_REF:0000038	IEA	UniProtKB-KW:KW-0999	C	Cytochrome c oxidase subunit 1	CO1	protein	taxon:79674	20180714	UniProt
UniProtKB	A0A0G2STB9	CO1		GO:0005743	GO_REF:0000040	IEA	UniProtKB-SubCell:SL-0168	C	Cytochrome c oxidase subunit 1	CO1	protein	taxon:79674	20180714	UniProt
UniProtKB	A0A0G2STB9	CO1		GO:0006119	GO_REF:0000041	IEA	UniPathway:UPA00705	P	Cytochrome c oxidase subunit 1	CO1	protein	taxon:79674	20180714	UniProt
UniProtKB	A0A0G2STB9	CO1		GO:0009060	GO_REF:0000002	IEA	InterPro:IPR000883	P	Cytochrome c oxidase subunit 1	CO1	protein	taxon:79674	20180714	InterPro
UniProtKB	A0A0G2STB9	CO1		GO:0016020	GO_REF:0000038	IEA	UniProtKB-KW:KW-0472	C	Cytochrome c oxidase subunit 1	CO1	protein	taxon:79674	20180714	UniProt
UniProtKB	A0A0G2STB9	CO1		GO:0016021	GO_REF:0000002	IEA	InterPro:IPR000883	C	Cytochrome c oxidase subunit 1	CO1	protein	taxon:79674	20180714	InterPro
UniProtKB	A0A0G2STB9	CO1		GO:0016021	GO_REF:0000038	IEA	UniProtKB-KW:KW-0812	C	Cytochrome c oxidase subunit 1	CO1	protein	taxon:79674	20180714	UniProt
UniProtKB	A0A0G2STB9	CO1		GO:0016491	GO_REF:0000038	IEA	UniProtKB-KW:KW-0560	F	Cytochrome c oxidase subunit 1	CO1	protein	taxon:79674	20180714	UniProt
UniProtKB	A0A0G2STB9	CO1		GO:0020037	GO_REF:0000002	IEA	InterPro:IPR000883	F	Cytochrome c oxidase subunit 1	CO1	protein	taxon:79674	20180714	InterPro
UniProtKB	A0A0G2STB9	CO1		GO:0022900	GO_REF:0000108	IEA	GO:0004129	P	Cytochrome c oxidase subunit 1	CO1	protein	taxon:79674	20180714	GOC
UniProtKB	A0A0G2STB9	CO1		GO:0046872	GO_REF:0000038	IEA	UniProtKB-KW:KW-0479	F	Cytochrome c oxidase subunit 1	CO1	protein	taxon:79674	20180714	UniProt
UniProtKB	A0A0G2STB9	CO1		GO:0055114	GO_REF:0000002	IEA	InterPro:IPR000883|InterPro:IPR023616|InterPro:IPR036927	P	Cytochrome c oxidase subunit 1	CO1	protein	taxon:79674	20180714	InterPro
UniProtKB	A0A0G2STB9	CO1		GO:0055114	GO_REF:0000038	IEA	UniProtKB-KW:KW-0249	P	Cytochrome c oxidase subunit 1	CO1	protein	taxon:79674	20180714	UniProt
UniProtKB	A0A0G2STB9	CO1		GO:0055114	GO_REF:0000038	IEA	UniProtKB-KW:KW-0560	P	Cytochrome c oxidase subunit 1	CO1	protein	taxon:79674	20180714	UniProt
UniProtKB	A0A0G2STB9	CO1		GO:0070469	GO_REF:0000038	IEA	UniProtKB-KW:KW-0679	C	Cytochrome c oxidase subunit 1	CO1	protein	taxon:79674	20180714	UniProt
UniProtKB	A0A0G2STB9	CO1		GO:1902600	GO_REF:0000108	IEA	GO:0004129	P	Cytochrome c oxidase subunit 1	CO1	protein	taxon:79674	20180714	GOC
UniProtKB	A0A0G2STC0	CO1		GO:0004129	GO_REF:0000002	IEA	InterPro:IPR000883|InterPro:IPR023616	F	Cytochrome c oxidase subunit 1	CO1	protein	taxon:79674	20180714	InterPro
UniProtKB	A0A0G2STC0	CO1		GO:0004129	GO_REF:0000003	IEA	EC:1.9.3.1	F	Cytochrome c oxidase subunit 1	CO1	protein	taxon:79674	20180714	UniProt
UniProtKB	A0A0G2STC0	CO1		GO:0005739	GO_REF:0000038	IEA	UniProtKB-KW:KW-0496	C	Cytochrome c oxidase subunit 1	CO1	protein	taxon:79674	20180714	UniProt
UniProtKB	A0A0G2STC0	CO1		GO:0005743	GO_REF:0000038	IEA	UniProtKB-KW:KW-0999	C	Cytochrome c oxidase subunit 1	CO1	protein	taxon:79674	20180714	UniProt
UniProtKB	A0A0G2STC0	CO1		GO:0005743	GO_REF:0000040	IEA	UniProtKB-SubCell:SL-0168	C	Cytochrome c oxidase subunit 1	CO1	protein	taxon:79674	20180714	UniProt
UniProtKB	A0A0G2STC0	CO1		GO:0006119	GO_REF:0000041	IEA	UniPathway:UPA00705	P	Cytochrome c oxidase subunit 1	CO1	protein	taxon:79674	20180714	UniProt
UniProtKB	A0A0G2STC0	CO1		GO:0009060	GO_REF:0000002	IEA	InterPro:IPR000883	P	Cytochrome c oxidase subunit 1	CO1	protein	taxon:79674	20180714	InterPro
UniProtKB	A0A0G2STC0	CO1		GO:0016020	GO_REF:0000038	IEA	UniProtKB-KW:KW-0472	C	Cytochrome c oxidase subunit 1	CO1	protein	taxon:79674	20180714	UniProt
UniProtKB	A0A0G2STC0	CO1		GO:0016021	GO_REF:0000002	IEA	InterPro:IPR000883	C	Cytochrome c oxidase subunit 1	CO1	protein	taxon:79674	20180714	InterPro
UniProtKB	A0A0G2STC0	CO1		GO:0016021	GO_REF:0000038	IEA	UniProtKB-KW:KW-0812	C	Cytochrome c oxidase subunit 1	CO1	protein	taxon:79674	20180714	UniProt
UniProtKB	A0A0G2STC0	CO1		GO:0016491	GO_REF:0000038	IEA	UniProtKB-KW:KW-0560	F	Cytochrome c oxidase subunit 1	CO1	protein	taxon:79674	20180714	UniProt
UniProtKB	A0A0G2STC0	CO1		GO:0020037	GO_REF:0000002	IEA	InterPro:IPR000883	F	Cytochrome c oxidase subunit 1	CO1	protein	taxon:79674	20180714	InterPro
UniProtKB	A0A0G2STC0	CO1		GO:0022900	GO_REF:0000108	IEA	GO:0004129	P	Cytochrome c oxidase subunit 1	CO1	protein	taxon:79674	20180714	GOC
UniProtKB	A0A0G2STC0	CO1		GO:0046872	GO_REF:0000038	IEA	UniProtKB-KW:KW-0479	F	Cytochrome c oxidase subunit 1	CO1	protein	taxon:79674	20180714	UniProt
UniProtKB	A0A0G2STC0	CO1		GO:0055114	GO_REF:0000002	IEA	InterPro:IPR000883|InterPro:IPR023616|InterPro:IPR036927	P	Cytochrome c oxidase subunit 1	CO1	protein	taxon:79674	20180714	InterPro
UniProtKB	A0A0G2STC0	CO1		GO:0055114	GO_REF:0000038	IEA	UniProtKB-KW:KW-0249	P	Cytochrome c oxidase subunit 1	CO1	protein	taxon:79674	20180714	UniProt
UniProtKB	A0A0G2STC0	CO1		GO:0055114	GO_REF:0000038	IEA	UniProtKB-KW:KW-0560	P	Cytochrome c oxidase subunit 1	CO1	protein	taxon:79674	20180714	UniProt
UniProtKB	A0A0G2STC0	CO1		GO:0070469	GO_REF:0000038	IEA	UniProtKB-KW:KW-0679	C	Cytochrome c oxidase subunit 1	CO1	protein	taxon:79674	20180714	UniProt
UniProtKB	A0A0G2STC0	CO1		GO:1902600	GO_REF:0000108	IEA	GO:0004129	P	Cytochrome c oxidase subunit 1	CO1	protein	taxon:79674	20180714	GOC
UniProtKB	A0A0G2STC2	CO1		GO:0004129	GO_REF:0000002	IEA	InterPro:IPR000883|InterPro:IPR023616	F	Cytochrome c oxidase subunit 1	CO1	protein	taxon:79674	20180714	InterPro
UniProtKB	A0A0G2STC2	CO1		GO:0004129	GO_REF:0000003	IEA	EC:1.9.3.1	F	Cytochrome c oxidase subunit 1	CO1	protein	taxon:79674	20180714	UniProt
UniProtKB	A0A0G2STC2	CO1		GO:0005739	GO_REF:0000038	IEA	UniProtKB-KW:KW-0496	C	Cytochrome c oxidase subunit 1	CO1	protein	taxon:79674	20180714	UniProt
UniProtKB	A0A0G2STC2	CO1		GO:0005743	GO_REF:0000038	IEA	UniProtKB-KW:KW-0999	C	Cytochrome c oxidase subunit 1	CO1	protein	taxon:79674	20180714	UniProt
UniProtKB	A0A0G2STC2	CO1		GO:0005743	GO_REF:0000040	IEA	UniProtKB-SubCell:SL-0168	C	Cytochrome c oxidase subunit 1	CO1	protein	taxon:79674	20180714	UniProt
UniProtKB	A0A0G2STC2	CO1		GO:0006119	GO_REF:0000041	IEA	UniPathway:UPA00705	P	Cytochrome c oxidase subunit 1	CO1	protein	taxon:79674	20180714	UniProt
UniProtKB	A0A0G2STC2	CO1		GO:0009060	GO_REF:0000002	IEA	InterPro:IPR000883	P	Cytochrome c oxidase subunit 1	CO1	protein	taxon:79674	20180714	InterPro
UniProtKB	A0A0G2STC2	CO1		GO:0016020	GO_REF:0000038	IEA	UniProtKB-KW:KW-0472	C	Cytochrome c oxidase subunit 1	CO1	protein	taxon:79674	20180714	UniProt
UniProtKB	A0A0G2STC2	CO1		GO:0016021	GO_REF:0000002	IEA	InterPro:IPR000883	C	Cytochrome c oxidase subunit 1	CO1	protein	taxon:79674	20180714	InterPro
UniProtKB	A0A0G2STC2	CO1		GO:0016021	GO_REF:0000038	IEA	UniProtKB-KW:KW-0812	C	Cytochrome c oxidase subunit 1	CO1	protein	taxon:79674	20180714	UniProt
UniProtKB	A0A0G2STC2	CO1		GO:0016491	GO_REF:0000038	IEA	UniProtKB-KW:KW-0560	F	Cytochrome c oxidase subunit 1	CO1	protein	taxon:79674	20180714	UniProt
UniProtKB	A0A0G2STC2	CO1		GO:0020037	GO_REF:0000002	IEA	InterPro:IPR000883	F	Cytochrome c oxidase subunit 1	CO1	protein	taxon:79674	20180714	InterPro
UniProtKB	A0A0G2STC2	CO1		GO:0022900	GO_REF:0000108	IEA	GO:0004129	P	Cytochrome c oxidase subunit 1	CO1	protein	taxon:79674	20180714	GOC
UniProtKB	A0A0G2STC2	CO1		GO:0046872	GO_REF:0000038	IEA	UniProtKB-KW:KW-0479	F	Cytochrome c oxidase subunit 1	CO1	protein	taxon:79674	20180714	UniProt
UniProtKB	A0A0G2STC2	CO1		GO:0055114	GO_REF:0000002	IEA	InterPro:IPR000883|InterPro:IPR023616|InterPro:IPR036927	P	Cytochrome c oxidase subunit 1	CO1	protein	taxon:79674	20180714	InterPro
UniProtKB	A0A0G2STC2	CO1		GO:0055114	GO_REF:0000038	IEA	UniProtKB-KW:KW-0249	P	Cytochrome c oxidase subunit 1	CO1	protein	taxon:79674	20180714	UniProt
UniProtKB	A0A0G2STC2	CO1		GO:0055114	GO_REF:0000038	IEA	UniProtKB-KW:KW-0560	P	Cytochrome c oxidase subunit 1	CO1	protein	taxon:79674	20180714	UniProt
UniProtKB	A0A0G2STC2	CO1		GO:0070469	GO_REF:0000038	IEA	UniProtKB-KW:KW-0679	C	Cytochrome c oxidase subunit 1	CO1	protein	taxon:79674	20180714	UniProt
UniProtKB	A0A0G2STC2	CO1		GO:1902600	GO_REF:0000108	IEA	GO:0004129	P	Cytochrome c oxidase subunit 1	CO1	protein	taxon:79674	20180714	GOC
UniProtKB	A0A0G2STC3	CO1		GO:0004129	GO_REF:0000002	IEA	InterPro:IPR000883|InterPro:IPR023616	F	Cytochrome c oxidase subunit 1	CO1	protein	taxon:79674	20180714	InterPro
UniProtKB	A0A0G2STC3	CO1		GO:0004129	GO_REF:0000003	IEA	EC:1.9.3.1	F	Cytochrome c oxidase subunit 1	CO1	protein	taxon:79674	20180714	UniProt
UniProtKB	A0A0G2STC3	CO1		GO:0005739	GO_REF:0000038	IEA	UniProtKB-KW:KW-0496	C	Cytochrome c oxidase subunit 1	CO1	protein	taxon:79674	20180714	UniProt
UniProtKB	A0A0G2STC3	CO1		GO:0005743	GO_REF:0000038	IEA	UniProtKB-KW:KW-0999	C	Cytochrome c oxidase subunit 1	CO1	protein	taxon:79674	20180714	UniProt
UniProtKB	A0A0G2STC3	CO1		GO:0005743	GO_REF:0000040	IEA	UniProtKB-SubCell:SL-0168	C	Cytochrome c oxidase subunit 1	CO1	protein	taxon:79674	20180714	UniProt
UniProtKB	A0A0G2STC3	CO1		GO:0006119	GO_REF:0000041	IEA	UniPathway:UPA00705	P	Cytochrome c oxidase subunit 1	CO1	protein	taxon:79674	20180714	UniProt
UniProtKB	A0A0G2STC3	CO1		GO:0009060	GO_REF:0000002	IEA	InterPro:IPR000883	P	Cytochrome c oxidase subunit 1	CO1	protein	taxon:79674	20180714	InterPro
UniProtKB	A0A0G2STC3	CO1		GO:0016020	GO_REF:0000038	IEA	UniProtKB-KW:KW-0472	C	Cytochrome c oxidase subunit 1	CO1	protein	taxon:79674	20180714	UniProt
UniProtKB	A0A0G2STC3	CO1		GO:0016021	GO_REF:0000002	IEA	InterPro:IPR000883	C	Cytochrome c oxidase subunit 1	CO1	protein	taxon:79674	20180714	InterPro
UniProtKB	A0A0G2STC3	CO1		GO:0016021	GO_REF:0000038	IEA	UniProtKB-KW:KW-0812	C	Cytochrome c oxidase subunit 1	CO1	protein	taxon:79674	20180714	UniProt
UniProtKB	A0A0G2STC3	CO1		GO:0016491	GO_REF:0000038	IEA	UniProtKB-KW:KW-0560	F	Cytochrome c oxidase subunit 1	CO1	protein	taxon:79674	20180714	UniProt
UniProtKB	A0A0G2STC3	CO1		GO:0020037	GO_REF:0000002	IEA	InterPro:IPR000883	F	Cytochrome c oxidase subunit 1	CO1	protein	taxon:79674	20180714	InterPro
UniProtKB	A0A0G2STC3	CO1		GO:0022900	GO_REF:0000108	IEA	GO:0004129	P	Cytochrome c oxidase subunit 1	CO1	protein	taxon:79674	20180714	GOC
UniProtKB	A0A0G2STC3	CO1		GO:0046872	GO_REF:0000038	IEA	UniProtKB-KW:KW-0479	F	Cytochrome c oxidase subunit 1	CO1	protein	taxon:79674	20180714	UniProt
UniProtKB	A0A0G2STC3	CO1		GO:0055114	GO_REF:0000002	IEA	InterPro:IPR000883|InterPro:IPR023616|InterPro:IPR036927	P	Cytochrome c oxidase subunit 1	CO1	protein	taxon:79674	20180714	InterPro
UniProtKB	A0A0G2STC3	CO1		GO:0055114	GO_REF:0000038	IEA	UniProtKB-KW:KW-0249	P	Cytochrome c oxidase subunit 1	CO1	protein	taxon:79674	20180714	UniProt
UniProtKB	A0A0G2STC3	CO1		GO:0055114	GO_REF:0000038	IEA	UniProtKB-KW:KW-0560	P	Cytochrome c oxidase subunit 1	CO1	protein	taxon:79674	20180714	UniProt
UniProtKB	A0A0G2STC3	CO1		GO:0070469	GO_REF:0000038	IEA	UniProtKB-KW:KW-0679	C	Cytochrome c oxidase subunit 1	CO1	protein	taxon:79674	20180714	UniProt
UniProtKB	A0A0G2STC3	CO1		GO:1902600	GO_REF:0000108	IEA	GO:0004129	P	Cytochrome c oxidase subunit 1	CO1	protein	taxon:79674	20180714	GOC
UniProtKB	A0A0G2STF1	CO1		GO:0004129	GO_REF:0000002	IEA	InterPro:IPR000883|InterPro:IPR023616	F	Cytochrome c oxidase subunit 1	CO1	protein	taxon:79674	20180714	InterPro
UniProtKB	A0A0G2STF1	CO1		GO:0004129	GO_REF:0000003	IEA	EC:1.9.3.1	F	Cytochrome c oxidase subunit 1	CO1	protein	taxon:79674	20180714	UniProt
UniProtKB	A0A0G2STF1	CO1		GO:0005739	GO_REF:0000038	IEA	UniProtKB-KW:KW-0496	C	Cytochrome c oxidase subunit 1	CO1	protein	taxon:79674	20180714	UniProt
UniProtKB	A0A0G2STF1	CO1		GO:0005743	GO_REF:0000038	IEA	UniProtKB-KW:KW-0999	C	Cytochrome c oxidase subunit 1	CO1	protein	taxon:79674	20180714	UniProt
UniProtKB	A0A0G2STF1	CO1		GO:0005743	GO_REF:0000040	IEA	UniProtKB-SubCell:SL-0168	C	Cytochrome c oxidase subunit 1	CO1	protein	taxon:79674	20180714	UniProt
UniProtKB	A0A0G2STF1	CO1		GO:0006119	GO_REF:0000041	IEA	UniPathway:UPA00705	P	Cytochrome c oxidase subunit 1	CO1	protein	taxon:79674	20180714	UniProt
UniProtKB	A0A0G2STF1	CO1		GO:0009060	GO_REF:0000002	IEA	InterPro:IPR000883	P	Cytochrome c oxidase subunit 1	CO1	protein	taxon:79674	20180714	InterPro
UniProtKB	A0A0G2STF1	CO1		GO:0016020	GO_REF:0000038	IEA	UniProtKB-KW:KW-0472	C	Cytochrome c oxidase subunit 1	CO1	protein	taxon:79674	20180714	UniProt
UniProtKB	A0A0G2STF1	CO1		GO:0016021	GO_REF:0000002	IEA	InterPro:IPR000883	C	Cytochrome c oxidase subunit 1	CO1	protein	taxon:79674	20180714	InterPro
UniProtKB	A0A0G2STF1	CO1		GO:0016021	GO_REF:0000038	IEA	UniProtKB-KW:KW-0812	C	Cytochrome c oxidase subunit 1	CO1	protein	taxon:79674	20180714	UniProt
UniProtKB	A0A0G2STF1	CO1		GO:0016491	GO_REF:0000038	IEA	UniProtKB-KW:KW-0560	F	Cytochrome c oxidase subunit 1	CO1	protein	taxon:79674	20180714	UniProt
UniProtKB	A0A0G2STF1	CO1		GO:0020037	GO_REF:0000002	IEA	InterPro:IPR000883	F	Cytochrome c oxidase subunit 1	CO1	protein	taxon:79674	20180714	InterPro
UniProtKB	A0A0G2STF1	CO1		GO:0022900	GO_REF:0000108	IEA	GO:0004129	P	Cytochrome c oxidase subunit 1	CO1	protein	taxon:79674	20180714	GOC
UniProtKB	A0A0G2STF1	CO1		GO:0046872	GO_REF:0000038	IEA	UniProtKB-KW:KW-0479	F	Cytochrome c oxidase subunit 1	CO1	protein	taxon:79674	20180714	UniProt
UniProtKB	A0A0G2STF1	CO1		GO:0055114	GO_REF:0000002	IEA	InterPro:IPR000883|InterPro:IPR023616|InterPro:IPR036927	P	Cytochrome c oxidase subunit 1	CO1	protein	taxon:79674	20180714	InterPro
UniProtKB	A0A0G2STF1	CO1		GO:0055114	GO_REF:0000038	IEA	UniProtKB-KW:KW-0249	P	Cytochrome c oxidase subunit 1	CO1	protein	taxon:79674	20180714	UniProt
UniProtKB	A0A0G2STF1	CO1		GO:0055114	GO_REF:0000038	IEA	UniProtKB-KW:KW-0560	P	Cytochrome c oxidase subunit 1	CO1	protein	taxon:79674	20180714	UniProt
UniProtKB	A0A0G2STF1	CO1		GO:0070469	GO_REF:0000038	IEA	UniProtKB-KW:KW-0679	C	Cytochrome c oxidase subunit 1	CO1	protein	taxon:79674	20180714	UniProt
UniProtKB	A0A0G2STF1	CO1		GO:1902600	GO_REF:0000108	IEA	GO:0004129	P	Cytochrome c oxidase subunit 1	CO1	protein	taxon:79674	20180714	GOC
UniProtKB	A0A0G2STF2	CO1		GO:0004129	GO_REF:0000002	IEA	InterPro:IPR000883|InterPro:IPR023616	F	Cytochrome c oxidase subunit 1	CO1	protein	taxon:79674	20180714	InterPro
UniProtKB	A0A0G2STF2	CO1		GO:0004129	GO_REF:0000003	IEA	EC:1.9.3.1	F	Cytochrome c oxidase subunit 1	CO1	protein	taxon:79674	20180714	UniProt
UniProtKB	A0A0G2STF2	CO1		GO:0005739	GO_REF:0000038	IEA	UniProtKB-KW:KW-0496	C	Cytochrome c oxidase subunit 1	CO1	protein	taxon:79674	20180714	UniProt
UniProtKB	A0A0G2STF2	CO1		GO:0005743	GO_REF:0000038	IEA	UniProtKB-KW:KW-0999	C	Cytochrome c oxidase subunit 1	CO1	protein	taxon:79674	20180714	UniProt
UniProtKB	A0A0G2STF2	CO1		GO:0005743	GO_REF:0000040	IEA	UniProtKB-SubCell:SL-0168	C	Cytochrome c oxidase subunit 1	CO1	protein	taxon:79674	20180714	UniProt
UniProtKB	A0A0G2STF2	CO1		GO:0006119	GO_REF:0000041	IEA	UniPathway:UPA00705	P	Cytochrome c oxidase subunit 1	CO1	protein	taxon:79674	20180714	UniProt
UniProtKB	A0A0G2STF2	CO1		GO:0009060	GO_REF:0000002	IEA	InterPro:IPR000883	P	Cytochrome c oxidase subunit 1	CO1	protein	taxon:79674	20180714	InterPro
UniProtKB	A0A0G2STF2	CO1		GO:0016020	GO_REF:0000038	IEA	UniProtKB-KW:KW-0472	C	Cytochrome c oxidase subunit 1	CO1	protein	taxon:79674	20180714	UniProt
UniProtKB	A0A0G2STF2	CO1		GO:0016021	GO_REF:0000002	IEA	InterPro:IPR000883	C	Cytochrome c oxidase subunit 1	CO1	protein	taxon:79674	20180714	InterPro
UniProtKB	A0A0G2STF2	CO1		GO:0016021	GO_REF:0000038	IEA	UniProtKB-KW:KW-0812	C	Cytochrome c oxidase subunit 1	CO1	protein	taxon:79674	20180714	UniProt
UniProtKB	A0A0G2STF2	CO1		GO:0016491	GO_REF:0000038	IEA	UniProtKB-KW:KW-0560	F	Cytochrome c oxidase subunit 1	CO1	protein	taxon:79674	20180714	UniProt
UniProtKB	A0A0G2STF2	CO1		GO:0020037	GO_REF:0000002	IEA	InterPro:IPR000883	F	Cytochrome c oxidase subunit 1	CO1	protein	taxon:79674	20180714	InterPro
UniProtKB	A0A0G2STF2	CO1		GO:0022900	GO_REF:0000108	IEA	GO:0004129	P	Cytochrome c oxidase subunit 1	CO1	protein	taxon:79674	20180714	GOC
UniProtKB	A0A0G2STF2	CO1		GO:0046872	GO_REF:0000038	IEA	UniProtKB-KW:KW-0479	F	Cytochrome c oxidase subunit 1	CO1	protein	taxon:79674	20180714	UniProt
UniProtKB	A0A0G2STF2	CO1		GO:0055114	GO_REF:0000002	IEA	InterPro:IPR000883|InterPro:IPR023616|InterPro:IPR036927	P	Cytochrome c oxidase subunit 1	CO1	protein	taxon:79674	20180714	InterPro
UniProtKB	A0A0G2STF2	CO1		GO:0055114	GO_REF:0000038	IEA	UniProtKB-KW:KW-0249	P	Cytochrome c oxidase subunit 1	CO1	protein	taxon:79674	20180714	UniProt
UniProtKB	A0A0G2STF2	CO1		GO:0055114	GO_REF:0000038	IEA	UniProtKB-KW:KW-0560	P	Cytochrome c oxidase subunit 1	CO1	protein	taxon:79674	20180714	UniProt
UniProtKB	A0A0G2STF2	CO1		GO:0070469	GO_REF:0000038	IEA	UniProtKB-KW:KW-0679	C	Cytochrome c oxidase subunit 1	CO1	protein	taxon:79674	20180714	UniProt
UniProtKB	A0A0G2STF2	CO1		GO:1902600	GO_REF:0000108	IEA	GO:0004129	P	Cytochrome c oxidase subunit 1	CO1	protein	taxon:79674	20180714	GOC
UniProtKB	A0A0G2STF3	CO1		GO:0004129	GO_REF:0000002	IEA	InterPro:IPR000883|InterPro:IPR023616	F	Cytochrome c oxidase subunit 1	CO1	protein	taxon:79674	20180714	InterPro
UniProtKB	A0A0G2STF3	CO1		GO:0004129	GO_REF:0000003	IEA	EC:1.9.3.1	F	Cytochrome c oxidase subunit 1	CO1	protein	taxon:79674	20180714	UniProt
UniProtKB	A0A0G2STF3	CO1		GO:0005739	GO_REF:0000038	IEA	UniProtKB-KW:KW-0496	C	Cytochrome c oxidase subunit 1	CO1	protein	taxon:79674	20180714	UniProt
UniProtKB	A0A0G2STF3	CO1		GO:0005743	GO_REF:0000038	IEA	UniProtKB-KW:KW-0999	C	Cytochrome c oxidase subunit 1	CO1	protein	taxon:79674	20180714	UniProt
UniProtKB	A0A0G2STF3	CO1		GO:0005743	GO_REF:0000040	IEA	UniProtKB-SubCell:SL-0168	C	Cytochrome c oxidase subunit 1	CO1	protein	taxon:79674	20180714	UniProt
UniProtKB	A0A0G2STF3	CO1		GO:0006119	GO_REF:0000041	IEA	UniPathway:UPA00705	P	Cytochrome c oxidase subunit 1	CO1	protein	taxon:79674	20180714	UniProt
UniProtKB	A0A0G2STF3	CO1		GO:0009060	GO_REF:0000002	IEA	InterPro:IPR000883	P	Cytochrome c oxidase subunit 1	CO1	protein	taxon:79674	20180714	InterPro
UniProtKB	A0A0G2STF3	CO1		GO:0016020	GO_REF:0000038	IEA	UniProtKB-KW:KW-0472	C	Cytochrome c oxidase subunit 1	CO1	protein	taxon:79674	20180714	UniProt
UniProtKB	A0A0G2STF3	CO1		GO:0016021	GO_REF:0000002	IEA	InterPro:IPR000883	C	Cytochrome c oxidase subunit 1	CO1	protein	taxon:79674	20180714	InterPro
UniProtKB	A0A0G2STF3	CO1		GO:0016021	GO_REF:0000038	IEA	UniProtKB-KW:KW-0812	C	Cytochrome c oxidase subunit 1	CO1	protein	taxon:79674	20180714	UniProt
UniProtKB	A0A0G2STF3	CO1		GO:0016491	GO_REF:0000038	IEA	UniProtKB-KW:KW-0560	F	Cytochrome c oxidase subunit 1	CO1	protein	taxon:79674	20180714	UniProt
UniProtKB	A0A0G2STF3	CO1		GO:0020037	GO_REF:0000002	IEA	InterPro:IPR000883	F	Cytochrome c oxidase subunit 1	CO1	protein	taxon:79674	20180714	InterPro
UniProtKB	A0A0G2STF3	CO1		GO:0022900	GO_REF:0000108	IEA	GO:0004129	P	Cytochrome c oxidase subunit 1	CO1	protein	taxon:79674	20180714	GOC
UniProtKB	A0A0G2STF3	CO1		GO:0046872	GO_REF:0000038	IEA	UniProtKB-KW:KW-0479	F	Cytochrome c oxidase subunit 1	CO1	protein	taxon:79674	20180714	UniProt
UniProtKB	A0A0G2STF3	CO1		GO:0055114	GO_REF:0000002	IEA	InterPro:IPR000883|InterPro:IPR023616|InterPro:IPR036927	P	Cytochrome c oxidase subunit 1	CO1	protein	taxon:79674	20180714	InterPro
UniProtKB	A0A0G2STF3	CO1		GO:0055114	GO_REF:0000038	IEA	UniProtKB-KW:KW-0249	P	Cytochrome c oxidase subunit 1	CO1	protein	taxon:79674	20180714	UniProt
UniProtKB	A0A0G2STF3	CO1		GO:0055114	GO_REF:0000038	IEA	UniProtKB-KW:KW-0560	P	Cytochrome c oxidase subunit 1	CO1	protein	taxon:79674	20180714	UniProt
UniProtKB	A0A0G2STF3	CO1		GO:0070469	GO_REF:0000038	IEA	UniProtKB-KW:KW-0679	C	Cytochrome c oxidase subunit 1	CO1	protein	taxon:79674	20180714	UniProt
UniProtKB	A0A0G2STF3	CO1		GO:1902600	GO_REF:0000108	IEA	GO:0004129	P	Cytochrome c oxidase subunit 1	CO1	protein	taxon:79674	20180714	GOC
UniProtKB	A0A0G2STF5	CO1		GO:0004129	GO_REF:0000002	IEA	InterPro:IPR000883|InterPro:IPR023616	F	Cytochrome c oxidase subunit 1	CO1	protein	taxon:79674	20180714	InterPro
UniProtKB	A0A0G2STF5	CO1		GO:0004129	GO_REF:0000003	IEA	EC:1.9.3.1	F	Cytochrome c oxidase subunit 1	CO1	protein	taxon:79674	20180714	UniProt
UniProtKB	A0A0G2STF5	CO1		GO:0005739	GO_REF:0000038	IEA	UniProtKB-KW:KW-0496	C	Cytochrome c oxidase subunit 1	CO1	protein	taxon:79674	20180714	UniProt
UniProtKB	A0A0G2STF5	CO1		GO:0005743	GO_REF:0000038	IEA	UniProtKB-KW:KW-0999	C	Cytochrome c oxidase subunit 1	CO1	protein	taxon:79674	20180714	UniProt
UniProtKB	A0A0G2STF5	CO1		GO:0005743	GO_REF:0000040	IEA	UniProtKB-SubCell:SL-0168	C	Cytochrome c oxidase subunit 1	CO1	protein	taxon:79674	20180714	UniProt
UniProtKB	A0A0G2STF5	CO1		GO:0006119	GO_REF:0000041	IEA	UniPathway:UPA00705	P	Cytochrome c oxidase subunit 1	CO1	protein	taxon:79674	20180714	UniProt
UniProtKB	A0A0G2STF5	CO1		GO:0009060	GO_REF:0000002	IEA	InterPro:IPR000883	P	Cytochrome c oxidase subunit 1	CO1	protein	taxon:79674	20180714	InterPro
UniProtKB	A0A0G2STF5	CO1		GO:0016020	GO_REF:0000038	IEA	UniProtKB-KW:KW-0472	C	Cytochrome c oxidase subunit 1	CO1	protein	taxon:79674	20180714	UniProt
UniProtKB	A0A0G2STF5	CO1		GO:0016021	GO_REF:0000002	IEA	InterPro:IPR000883	C	Cytochrome c oxidase subunit 1	CO1	protein	taxon:79674	20180714	InterPro
UniProtKB	A0A0G2STF5	CO1		GO:0016021	GO_REF:0000038	IEA	UniProtKB-KW:KW-0812	C	Cytochrome c oxidase subunit 1	CO1	protein	taxon:79674	20180714	UniProt
UniProtKB	A0A0G2STF5	CO1		GO:0016491	GO_REF:0000038	IEA	UniProtKB-KW:KW-0560	F	Cytochrome c oxidase subunit 1	CO1	protein	taxon:79674	20180714	UniProt
UniProtKB	A0A0G2STF5	CO1		GO:0020037	GO_REF:0000002	IEA	InterPro:IPR000883	F	Cytochrome c oxidase subunit 1	CO1	protein	taxon:79674	20180714	InterPro
UniProtKB	A0A0G2STF5	CO1		GO:0022900	GO_REF:0000108	IEA	GO:0004129	P	Cytochrome c oxidase subunit 1	CO1	protein	taxon:79674	20180714	GOC
UniProtKB	A0A0G2STF5	CO1		GO:0046872	GO_REF:0000038	IEA	UniProtKB-KW:KW-0479	F	Cytochrome c oxidase subunit 1	CO1	protein	taxon:79674	20180714	UniProt
UniProtKB	A0A0G2STF5	CO1		GO:0055114	GO_REF:0000002	IEA	InterPro:IPR000883|InterPro:IPR023616|InterPro:IPR036927	P	Cytochrome c oxidase subunit 1	CO1	protein	taxon:79674	20180714	InterPro
UniProtKB	A0A0G2STF5	CO1		GO:0055114	GO_REF:0000038	IEA	UniProtKB-KW:KW-0249	P	Cytochrome c oxidase subunit 1	CO1	protein	taxon:79674	20180714	UniProt
UniProtKB	A0A0G2STF5	CO1		GO:0055114	GO_REF:0000038	IEA	UniProtKB-KW:KW-0560	P	Cytochrome c oxidase subunit 1	CO1	protein	taxon:79674	20180714	UniProt
UniProtKB	A0A0G2STF5	CO1		GO:0070469	GO_REF:0000038	IEA	UniProtKB-KW:KW-0679	C	Cytochrome c oxidase subunit 1	CO1	protein	taxon:79674	20180714	UniProt
UniProtKB	A0A0G2STF5	CO1		GO:1902600	GO_REF:0000108	IEA	GO:0004129	P	Cytochrome c oxidase subunit 1	CO1	protein	taxon:79674	20180714	GOC
UniProtKB	A0A0G2STF6	CO1		GO:0004129	GO_REF:0000002	IEA	InterPro:IPR000883|InterPro:IPR023616	F	Cytochrome c oxidase subunit 1	CO1	protein	taxon:79674	20180714	InterPro
UniProtKB	A0A0G2STF6	CO1		GO:0004129	GO_REF:0000003	IEA	EC:1.9.3.1	F	Cytochrome c oxidase subunit 1	CO1	protein	taxon:79674	20180714	UniProt
UniProtKB	A0A0G2STF6	CO1		GO:0005739	GO_REF:0000038	IEA	UniProtKB-KW:KW-0496	C	Cytochrome c oxidase subunit 1	CO1	protein	taxon:79674	20180714	UniProt
UniProtKB	A0A0G2STF6	CO1		GO:0005743	GO_REF:0000038	IEA	UniProtKB-KW:KW-0999	C	Cytochrome c oxidase subunit 1	CO1	protein	taxon:79674	20180714	UniProt
UniProtKB	A0A0G2STF6	CO1		GO:0005743	GO_REF:0000040	IEA	UniProtKB-SubCell:SL-0168	C	Cytochrome c oxidase subunit 1	CO1	protein	taxon:79674	20180714	UniProt
UniProtKB	A0A0G2STF6	CO1		GO:0006119	GO_REF:0000041	IEA	UniPathway:UPA00705	P	Cytochrome c oxidase subunit 1	CO1	protein	taxon:79674	20180714	UniProt
UniProtKB	A0A0G2STF6	CO1		GO:0009060	GO_REF:0000002	IEA	InterPro:IPR000883	P	Cytochrome c oxidase subunit 1	CO1	protein	taxon:79674	20180714	InterPro
UniProtKB	A0A0G2STF6	CO1		GO:0016020	GO_REF:0000038	IEA	UniProtKB-KW:KW-0472	C	Cytochrome c oxidase subunit 1	CO1	protein	taxon:79674	20180714	UniProt
UniProtKB	A0A0G2STF6	CO1		GO:0016021	GO_REF:0000002	IEA	InterPro:IPR000883	C	Cytochrome c oxidase subunit 1	CO1	protein	taxon:79674	20180714	InterPro
UniProtKB	A0A0G2STF6	CO1		GO:0016021	GO_REF:0000038	IEA	UniProtKB-KW:KW-0812	C	Cytochrome c oxidase subunit 1	CO1	protein	taxon:79674	20180714	UniProt
UniProtKB	A0A0G2STF6	CO1		GO:0016491	GO_REF:0000038	IEA	UniProtKB-KW:KW-0560	F	Cytochrome c oxidase subunit 1	CO1	protein	taxon:79674	20180714	UniProt
UniProtKB	A0A0G2STF6	CO1		GO:0020037	GO_REF:0000002	IEA	InterPro:IPR000883	F	Cytochrome c oxidase subunit 1	CO1	protein	taxon:79674	20180714	InterPro
UniProtKB	A0A0G2STF6	CO1		GO:0022900	GO_REF:0000108	IEA	GO:0004129	P	Cytochrome c oxidase subunit 1	CO1	protein	taxon:79674	20180714	GOC
UniProtKB	A0A0G2STF6	CO1		GO:0046872	GO_REF:0000038	IEA	UniProtKB-KW:KW-0479	F	Cytochrome c oxidase subunit 1	CO1	protein	taxon:79674	20180714	UniProt
UniProtKB	A0A0G2STF6	CO1		GO:0055114	GO_REF:0000002	IEA	InterPro:IPR000883|InterPro:IPR023616|InterPro:IPR036927	P	Cytochrome c oxidase subunit 1	CO1	protein	taxon:79674	20180714	InterPro
UniProtKB	A0A0G2STF6	CO1		GO:0055114	GO_REF:0000038	IEA	UniProtKB-KW:KW-0249	P	Cytochrome c oxidase subunit 1	CO1	protein	taxon:79674	20180714	UniProt
UniProtKB	A0A0G2STF6	CO1		GO:0055114	GO_REF:0000038	IEA	UniProtKB-KW:KW-0560	P	Cytochrome c oxidase subunit 1	CO1	protein	taxon:79674	20180714	UniProt
UniProtKB	A0A0G2STF6	CO1		GO:0070469	GO_REF:0000038	IEA	UniProtKB-KW:KW-0679	C	Cytochrome c oxidase subunit 1	CO1	protein	taxon:79674	20180714	UniProt
UniProtKB	A0A0G2STF6	CO1		GO:1902600	GO_REF:0000108	IEA	GO:0004129	P	Cytochrome c oxidase subunit 1	CO1	protein	taxon:79674	20180714	GOC
UniProtKB	A0A0G2STF7	CO1		GO:0004129	GO_REF:0000002	IEA	InterPro:IPR000883|InterPro:IPR023616	F	Cytochrome c oxidase subunit 1	CO1	protein	taxon:79674	20180714	InterPro
UniProtKB	A0A0G2STF7	CO1		GO:0004129	GO_REF:0000003	IEA	EC:1.9.3.1	F	Cytochrome c oxidase subunit 1	CO1	protein	taxon:79674	20180714	UniProt
UniProtKB	A0A0G2STF7	CO1		GO:0005739	GO_REF:0000038	IEA	UniProtKB-KW:KW-0496	C	Cytochrome c oxidase subunit 1	CO1	protein	taxon:79674	20180714	UniProt
UniProtKB	A0A0G2STF7	CO1		GO:0005743	GO_REF:0000038	IEA	UniProtKB-KW:KW-0999	C	Cytochrome c oxidase subunit 1	CO1	protein	taxon:79674	20180714	UniProt
UniProtKB	A0A0G2STF7	CO1		GO:0005743	GO_REF:0000040	IEA	UniProtKB-SubCell:SL-0168	C	Cytochrome c oxidase subunit 1	CO1	protein	taxon:79674	20180714	UniProt
UniProtKB	A0A0G2STF7	CO1		GO:0006119	GO_REF:0000041	IEA	UniPathway:UPA00705	P	Cytochrome c oxidase subunit 1	CO1	protein	taxon:79674	20180714	UniProt
UniProtKB	A0A0G2STF7	CO1		GO:0009060	GO_REF:0000002	IEA	InterPro:IPR000883	P	Cytochrome c oxidase subunit 1	CO1	protein	taxon:79674	20180714	InterPro
UniProtKB	A0A0G2STF7	CO1		GO:0016020	GO_REF:0000038	IEA	UniProtKB-KW:KW-0472	C	Cytochrome c oxidase subunit 1	CO1	protein	taxon:79674	20180714	UniProt
UniProtKB	A0A0G2STF7	CO1		GO:0016021	GO_REF:0000002	IEA	InterPro:IPR000883	C	Cytochrome c oxidase subunit 1	CO1	protein	taxon:79674	20180714	InterPro
UniProtKB	A0A0G2STF7	CO1		GO:0016021	GO_REF:0000038	IEA	UniProtKB-KW:KW-0812	C	Cytochrome c oxidase subunit 1	CO1	protein	taxon:79674	20180714	UniProt
UniProtKB	A0A0G2STF7	CO1		GO:0016491	GO_REF:0000038	IEA	UniProtKB-KW:KW-0560	F	Cytochrome c oxidase subunit 1	CO1	protein	taxon:79674	20180714	UniProt
UniProtKB	A0A0G2STF7	CO1		GO:0020037	GO_REF:0000002	IEA	InterPro:IPR000883	F	Cytochrome c oxidase subunit 1	CO1	protein	taxon:79674	20180714	InterPro
UniProtKB	A0A0G2STF7	CO1		GO:0022900	GO_REF:0000108	IEA	GO:0004129	P	Cytochrome c oxidase subunit 1	CO1	protein	taxon:79674	20180714	GOC
UniProtKB	A0A0G2STF7	CO1		GO:0046872	GO_REF:0000038	IEA	UniProtKB-KW:KW-0479	F	Cytochrome c oxidase subunit 1	CO1	protein	taxon:79674	20180714	UniProt
UniProtKB	A0A0G2STF7	CO1		GO:0055114	GO_REF:0000002	IEA	InterPro:IPR000883|InterPro:IPR023616|InterPro:IPR036927	P	Cytochrome c oxidase subunit 1	CO1	protein	taxon:79674	20180714	InterPro
UniProtKB	A0A0G2STF7	CO1		GO:0055114	GO_REF:0000038	IEA	UniProtKB-KW:KW-0249	P	Cytochrome c oxidase subunit 1	CO1	protein	taxon:79674	20180714	UniProt
UniProtKB	A0A0G2STF7	CO1		GO:0055114	GO_REF:0000038	IEA	UniProtKB-KW:KW-0560	P	Cytochrome c oxidase subunit 1	CO1	protein	taxon:79674	20180714	UniProt
UniProtKB	A0A0G2STF7	CO1		GO:0070469	GO_REF:0000038	IEA	UniProtKB-KW:KW-0679	C	Cytochrome c oxidase subunit 1	CO1	protein	taxon:79674	20180714	UniProt
UniProtKB	A0A0G2STF7	CO1		GO:1902600	GO_REF:0000108	IEA	GO:0004129	P	Cytochrome c oxidase subunit 1	CO1	protein	taxon:79674	20180714	GOC
UniProtKB	A0A0G2STF8	CO1		GO:0004129	GO_REF:0000002	IEA	InterPro:IPR000883|InterPro:IPR023616	F	Cytochrome c oxidase subunit 1	CO1	protein	taxon:79674	20180714	InterPro
UniProtKB	A0A0G2STF8	CO1		GO:0004129	GO_REF:0000003	IEA	EC:1.9.3.1	F	Cytochrome c oxidase subunit 1	CO1	protein	taxon:79674	20180714	UniProt
UniProtKB	A0A0G2STF8	CO1		GO:0005739	GO_REF:0000038	IEA	UniProtKB-KW:KW-0496	C	Cytochrome c oxidase subunit 1	CO1	protein	taxon:79674	20180714	UniProt
UniProtKB	A0A0G2STF8	CO1		GO:0005743	GO_REF:0000038	IEA	UniProtKB-KW:KW-0999	C	Cytochrome c oxidase subunit 1	CO1	protein	taxon:79674	20180714	UniProt
UniProtKB	A0A0G2STF8	CO1		GO:0005743	GO_REF:0000040	IEA	UniProtKB-SubCell:SL-0168	C	Cytochrome c oxidase subunit 1	CO1	protein	taxon:79674	20180714	UniProt
UniProtKB	A0A0G2STF8	CO1		GO:0006119	GO_REF:0000041	IEA	UniPathway:UPA00705	P	Cytochrome c oxidase subunit 1	CO1	protein	taxon:79674	20180714	UniProt
UniProtKB	A0A0G2STF8	CO1		GO:0009060	GO_REF:0000002	IEA	InterPro:IPR000883	P	Cytochrome c oxidase subunit 1	CO1	protein	taxon:79674	20180714	InterPro
UniProtKB	A0A0G2STF8	CO1		GO:0016020	GO_REF:0000038	IEA	UniProtKB-KW:KW-0472	C	Cytochrome c oxidase subunit 1	CO1	protein	taxon:79674	20180714	UniProt
UniProtKB	A0A0G2STF8	CO1		GO:0016021	GO_REF:0000002	IEA	InterPro:IPR000883	C	Cytochrome c oxidase subunit 1	CO1	protein	taxon:79674	20180714	InterPro
UniProtKB	A0A0G2STF8	CO1		GO:0016021	GO_REF:0000038	IEA	UniProtKB-KW:KW-0812	C	Cytochrome c oxidase subunit 1	CO1	protein	taxon:79674	20180714	UniProt
UniProtKB	A0A0G2STF8	CO1		GO:0016491	GO_REF:0000038	IEA	UniProtKB-KW:KW-0560	F	Cytochrome c oxidase subunit 1	CO1	protein	taxon:79674	20180714	UniProt
UniProtKB	A0A0G2STF8	CO1		GO:0020037	GO_REF:0000002	IEA	InterPro:IPR000883	F	Cytochrome c oxidase subunit 1	CO1	protein	taxon:79674	20180714	InterPro
UniProtKB	A0A0G2STF8	CO1		GO:0022900	GO_REF:0000108	IEA	GO:0004129	P	Cytochrome c oxidase subunit 1	CO1	protein	taxon:79674	20180714	GOC
UniProtKB	A0A0G2STF8	CO1		GO:0046872	GO_REF:0000038	IEA	UniProtKB-KW:KW-0479	F	Cytochrome c oxidase subunit 1	CO1	protein	taxon:79674	20180714	UniProt
UniProtKB	A0A0G2STF8	CO1		GO:0055114	GO_REF:0000002	IEA	InterPro:IPR000883|InterPro:IPR023616|InterPro:IPR036927	P	Cytochrome c oxidase subunit 1	CO1	protein	taxon:79674	20180714	InterPro
UniProtKB	A0A0G2STF8	CO1		GO:0055114	GO_REF:0000038	IEA	UniProtKB-KW:KW-0249	P	Cytochrome c oxidase subunit 1	CO1	protein	taxon:79674	20180714	UniProt
UniProtKB	A0A0G2STF8	CO1		GO:0055114	GO_REF:0000038	IEA	UniProtKB-KW:KW-0560	P	Cytochrome c oxidase subunit 1	CO1	protein	taxon:79674	20180714	UniProt
UniProtKB	A0A0G2STF8	CO1		GO:0070469	GO_REF:0000038	IEA	UniProtKB-KW:KW-0679	C	Cytochrome c oxidase subunit 1	CO1	protein	taxon:79674	20180714	UniProt
UniProtKB	A0A0G2STF8	CO1		GO:1902600	GO_REF:0000108	IEA	GO:0004129	P	Cytochrome c oxidase subunit 1	CO1	protein	taxon:79674	20180714	GOC
UniProtKB	A0A0G2STH8	CO1		GO:0004129	GO_REF:0000002	IEA	InterPro:IPR000883|InterPro:IPR023616	F	Cytochrome c oxidase subunit 1	CO1	protein	taxon:79674	20180714	InterPro
UniProtKB	A0A0G2STH8	CO1		GO:0004129	GO_REF:0000003	IEA	EC:1.9.3.1	F	Cytochrome c oxidase subunit 1	CO1	protein	taxon:79674	20180714	UniProt
UniProtKB	A0A0G2STH8	CO1		GO:0005739	GO_REF:0000038	IEA	UniProtKB-KW:KW-0496	C	Cytochrome c oxidase subunit 1	CO1	protein	taxon:79674	20180714	UniProt
UniProtKB	A0A0G2STH8	CO1		GO:0005743	GO_REF:0000038	IEA	UniProtKB-KW:KW-0999	C	Cytochrome c oxidase subunit 1	CO1	protein	taxon:79674	20180714	UniProt
UniProtKB	A0A0G2STH8	CO1		GO:0005743	GO_REF:0000040	IEA	UniProtKB-SubCell:SL-0168	C	Cytochrome c oxidase subunit 1	CO1	protein	taxon:79674	20180714	UniProt
UniProtKB	A0A0G2STH8	CO1		GO:0006119	GO_REF:0000041	IEA	UniPathway:UPA00705	P	Cytochrome c oxidase subunit 1	CO1	protein	taxon:79674	20180714	UniProt
UniProtKB	A0A0G2STH8	CO1		GO:0009060	GO_REF:0000002	IEA	InterPro:IPR000883	P	Cytochrome c oxidase subunit 1	CO1	protein	taxon:79674	20180714	InterPro
UniProtKB	A0A0G2STH8	CO1		GO:0016020	GO_REF:0000038	IEA	UniProtKB-KW:KW-0472	C	Cytochrome c oxidase subunit 1	CO1	protein	taxon:79674	20180714	UniProt
UniProtKB	A0A0G2STH8	CO1		GO:0016021	GO_REF:0000002	IEA	InterPro:IPR000883	C	Cytochrome c oxidase subunit 1	CO1	protein	taxon:79674	20180714	InterPro
UniProtKB	A0A0G2STH8	CO1		GO:0016021	GO_REF:0000038	IEA	UniProtKB-KW:KW-0812	C	Cytochrome c oxidase subunit 1	CO1	protein	taxon:79674	20180714	UniProt
UniProtKB	A0A0G2STH8	CO1		GO:0016491	GO_REF:0000038	IEA	UniProtKB-KW:KW-0560	F	Cytochrome c oxidase subunit 1	CO1	protein	taxon:79674	20180714	UniProt
UniProtKB	A0A0G2STH8	CO1		GO:0020037	GO_REF:0000002	IEA	InterPro:IPR000883	F	Cytochrome c oxidase subunit 1	CO1	protein	taxon:79674	20180714	InterPro
UniProtKB	A0A0G2STH8	CO1		GO:0022900	GO_REF:0000108	IEA	GO:0004129	P	Cytochrome c oxidase subunit 1	CO1	protein	taxon:79674	20180714	GOC
UniProtKB	A0A0G2STH8	CO1		GO:0046872	GO_REF:0000038	IEA	UniProtKB-KW:KW-0479	F	Cytochrome c oxidase subunit 1	CO1	protein	taxon:79674	20180714	UniProt
UniProtKB	A0A0G2STH8	CO1		GO:0055114	GO_REF:0000002	IEA	InterPro:IPR000883|InterPro:IPR023616|InterPro:IPR036927	P	Cytochrome c oxidase subunit 1	CO1	protein	taxon:79674	20180714	InterPro
UniProtKB	A0A0G2STH8	CO1		GO:0055114	GO_REF:0000038	IEA	UniProtKB-KW:KW-0249	P	Cytochrome c oxidase subunit 1	CO1	protein	taxon:79674	20180714	UniProt
UniProtKB	A0A0G2STH8	CO1		GO:0055114	GO_REF:0000038	IEA	UniProtKB-KW:KW-0560	P	Cytochrome c oxidase subunit 1	CO1	protein	taxon:79674	20180714	UniProt
UniProtKB	A0A0G2STH8	CO1		GO:0070469	GO_REF:0000038	IEA	UniProtKB-KW:KW-0679	C	Cytochrome c oxidase subunit 1	CO1	protein	taxon:79674	20180714	UniProt
UniProtKB	A0A0G2STH8	CO1		GO:1902600	GO_REF:0000108	IEA	GO:0004129	P	Cytochrome c oxidase subunit 1	CO1	protein	taxon:79674	20180714	GOC
UniProtKB	A0A0G2STI0	CO1		GO:0004129	GO_REF:0000002	IEA	InterPro:IPR000883|InterPro:IPR023616	F	Cytochrome c oxidase subunit 1	CO1	protein	taxon:79674	20180714	InterPro
UniProtKB	A0A0G2STI0	CO1		GO:0004129	GO_REF:0000003	IEA	EC:1.9.3.1	F	Cytochrome c oxidase subunit 1	CO1	protein	taxon:79674	20180714	UniProt
UniProtKB	A0A0G2STI0	CO1		GO:0005739	GO_REF:0000038	IEA	UniProtKB-KW:KW-0496	C	Cytochrome c oxidase subunit 1	CO1	protein	taxon:79674	20180714	UniProt
UniProtKB	A0A0G2STI0	CO1		GO:0005743	GO_REF:0000038	IEA	UniProtKB-KW:KW-0999	C	Cytochrome c oxidase subunit 1	CO1	protein	taxon:79674	20180714	UniProt
UniProtKB	A0A0G2STI0	CO1		GO:0005743	GO_REF:0000040	IEA	UniProtKB-SubCell:SL-0168	C	Cytochrome c oxidase subunit 1	CO1	protein	taxon:79674	20180714	UniProt
UniProtKB	A0A0G2STI0	CO1		GO:0006119	GO_REF:0000041	IEA	UniPathway:UPA00705	P	Cytochrome c oxidase subunit 1	CO1	protein	taxon:79674	20180714	UniProt
UniProtKB	A0A0G2STI0	CO1		GO:0009060	GO_REF:0000002	IEA	InterPro:IPR000883	P	Cytochrome c oxidase subunit 1	CO1	protein	taxon:79674	20180714	InterPro
UniProtKB	A0A0G2STI0	CO1		GO:0016020	GO_REF:0000038	IEA	UniProtKB-KW:KW-0472	C	Cytochrome c oxidase subunit 1	CO1	protein	taxon:79674	20180714	UniProt
UniProtKB	A0A0G2STI0	CO1		GO:0016021	GO_REF:0000002	IEA	InterPro:IPR000883	C	Cytochrome c oxidase subunit 1	CO1	protein	taxon:79674	20180714	InterPro
UniProtKB	A0A0G2STI0	CO1		GO:0016021	GO_REF:0000038	IEA	UniProtKB-KW:KW-0812	C	Cytochrome c oxidase subunit 1	CO1	protein	taxon:79674	20180714	UniProt
UniProtKB	A0A0G2STI0	CO1		GO:0016491	GO_REF:0000038	IEA	UniProtKB-KW:KW-0560	F	Cytochrome c oxidase subunit 1	CO1	protein	taxon:79674	20180714	UniProt
UniProtKB	A0A0G2STI0	CO1		GO:0020037	GO_REF:0000002	IEA	InterPro:IPR000883	F	Cytochrome c oxidase subunit 1	CO1	protein	taxon:79674	20180714	InterPro
UniProtKB	A0A0G2STI0	CO1		GO:0022900	GO_REF:0000108	IEA	GO:0004129	P	Cytochrome c oxidase subunit 1	CO1	protein	taxon:79674	20180714	GOC
UniProtKB	A0A0G2STI0	CO1		GO:0046872	GO_REF:0000038	IEA	UniProtKB-KW:KW-0479	F	Cytochrome c oxidase subunit 1	CO1	protein	taxon:79674	20180714	UniProt
UniProtKB	A0A0G2STI0	CO1		GO:0055114	GO_REF:0000002	IEA	InterPro:IPR000883|InterPro:IPR023616|InterPro:IPR036927	P	Cytochrome c oxidase subunit 1	CO1	protein	taxon:79674	20180714	InterPro
UniProtKB	A0A0G2STI0	CO1		GO:0055114	GO_REF:0000038	IEA	UniProtKB-KW:KW-0249	P	Cytochrome c oxidase subunit 1	CO1	protein	taxon:79674	20180714	UniProt
UniProtKB	A0A0G2STI0	CO1		GO:0055114	GO_REF:0000038	IEA	UniProtKB-KW:KW-0560	P	Cytochrome c oxidase subunit 1	CO1	protein	taxon:79674	20180714	UniProt
UniProtKB	A0A0G2STI0	CO1		GO:0070469	GO_REF:0000038	IEA	UniProtKB-KW:KW-0679	C	Cytochrome c oxidase subunit 1	CO1	protein	taxon:79674	20180714	UniProt
UniProtKB	A0A0G2STI0	CO1		GO:1902600	GO_REF:0000108	IEA	GO:0004129	P	Cytochrome c oxidase subunit 1	CO1	protein	taxon:79674	20180714	GOC
UniProtKB	A0A0G2STI2	CO1		GO:0004129	GO_REF:0000002	IEA	InterPro:IPR000883|InterPro:IPR023616	F	Cytochrome c oxidase subunit 1	CO1	protein	taxon:79674	20180714	InterPro
UniProtKB	A0A0G2STI2	CO1		GO:0004129	GO_REF:0000003	IEA	EC:1.9.3.1	F	Cytochrome c oxidase subunit 1	CO1	protein	taxon:79674	20180714	UniProt
UniProtKB	A0A0G2STI2	CO1		GO:0005739	GO_REF:0000038	IEA	UniProtKB-KW:KW-0496	C	Cytochrome c oxidase subunit 1	CO1	protein	taxon:79674	20180714	UniProt
UniProtKB	A0A0G2STI2	CO1		GO:0005743	GO_REF:0000038	IEA	UniProtKB-KW:KW-0999	C	Cytochrome c oxidase subunit 1	CO1	protein	taxon:79674	20180714	UniProt
UniProtKB	A0A0G2STI2	CO1		GO:0005743	GO_REF:0000040	IEA	UniProtKB-SubCell:SL-0168	C	Cytochrome c oxidase subunit 1	CO1	protein	taxon:79674	20180714	UniProt
UniProtKB	A0A0G2STI2	CO1		GO:0006119	GO_REF:0000041	IEA	UniPathway:UPA00705	P	Cytochrome c oxidase subunit 1	CO1	protein	taxon:79674	20180714	UniProt
UniProtKB	A0A0G2STI2	CO1		GO:0009060	GO_REF:0000002	IEA	InterPro:IPR000883	P	Cytochrome c oxidase subunit 1	CO1	protein	taxon:79674	20180714	InterPro
UniProtKB	A0A0G2STI2	CO1		GO:0016020	GO_REF:0000038	IEA	UniProtKB-KW:KW-0472	C	Cytochrome c oxidase subunit 1	CO1	protein	taxon:79674	20180714	UniProt
UniProtKB	A0A0G2STI2	CO1		GO:0016021	GO_REF:0000002	IEA	InterPro:IPR000883	C	Cytochrome c oxidase subunit 1	CO1	protein	taxon:79674	20180714	InterPro
UniProtKB	A0A0G2STI2	CO1		GO:0016021	GO_REF:0000038	IEA	UniProtKB-KW:KW-0812	C	Cytochrome c oxidase subunit 1	CO1	protein	taxon:79674	20180714	UniProt
UniProtKB	A0A0G2STI2	CO1		GO:0016491	GO_REF:0000038	IEA	UniProtKB-KW:KW-0560	F	Cytochrome c oxidase subunit 1	CO1	protein	taxon:79674	20180714	UniProt
UniProtKB	A0A0G2STI2	CO1		GO:0020037	GO_REF:0000002	IEA	InterPro:IPR000883	F	Cytochrome c oxidase subunit 1	CO1	protein	taxon:79674	20180714	InterPro
UniProtKB	A0A0G2STI2	CO1		GO:0022900	GO_REF:0000108	IEA	GO:0004129	P	Cytochrome c oxidase subunit 1	CO1	protein	taxon:79674	20180714	GOC
UniProtKB	A0A0G2STI2	CO1		GO:0046872	GO_REF:0000038	IEA	UniProtKB-KW:KW-0479	F	Cytochrome c oxidase subunit 1	CO1	protein	taxon:79674	20180714	UniProt
UniProtKB	A0A0G2STI2	CO1		GO:0055114	GO_REF:0000002	IEA	InterPro:IPR000883|InterPro:IPR023616|InterPro:IPR036927	P	Cytochrome c oxidase subunit 1	CO1	protein	taxon:79674	20180714	InterPro
UniProtKB	A0A0G2STI2	CO1		GO:0055114	GO_REF:0000038	IEA	UniProtKB-KW:KW-0249	P	Cytochrome c oxidase subunit 1	CO1	protein	taxon:79674	20180714	UniProt
UniProtKB	A0A0G2STI2	CO1		GO:0055114	GO_REF:0000038	IEA	UniProtKB-KW:KW-0560	P	Cytochrome c oxidase subunit 1	CO1	protein	taxon:79674	20180714	UniProt
UniProtKB	A0A0G2STI2	CO1		GO:0070469	GO_REF:0000038	IEA	UniProtKB-KW:KW-0679	C	Cytochrome c oxidase subunit 1	CO1	protein	taxon:79674	20180714	UniProt
UniProtKB	A0A0G2STI2	CO1		GO:1902600	GO_REF:0000108	IEA	GO:0004129	P	Cytochrome c oxidase subunit 1	CO1	protein	taxon:79674	20180714	GOC
UniProtKB	A0A0G2STI6	CO1		GO:0004129	GO_REF:0000002	IEA	InterPro:IPR000883|InterPro:IPR023616	F	Cytochrome c oxidase subunit 1	CO1	protein	taxon:79674	20180714	InterPro
UniProtKB	A0A0G2STI6	CO1		GO:0004129	GO_REF:0000003	IEA	EC:1.9.3.1	F	Cytochrome c oxidase subunit 1	CO1	protein	taxon:79674	20180714	UniProt
UniProtKB	A0A0G2STI6	CO1		GO:0005739	GO_REF:0000038	IEA	UniProtKB-KW:KW-0496	C	Cytochrome c oxidase subunit 1	CO1	protein	taxon:79674	20180714	UniProt
UniProtKB	A0A0G2STI6	CO1		GO:0005743	GO_REF:0000038	IEA	UniProtKB-KW:KW-0999	C	Cytochrome c oxidase subunit 1	CO1	protein	taxon:79674	20180714	UniProt
UniProtKB	A0A0G2STI6	CO1		GO:0005743	GO_REF:0000040	IEA	UniProtKB-SubCell:SL-0168	C	Cytochrome c oxidase subunit 1	CO1	protein	taxon:79674	20180714	UniProt
UniProtKB	A0A0G2STI6	CO1		GO:0006119	GO_REF:0000041	IEA	UniPathway:UPA00705	P	Cytochrome c oxidase subunit 1	CO1	protein	taxon:79674	20180714	UniProt
UniProtKB	A0A0G2STI6	CO1		GO:0009060	GO_REF:0000002	IEA	InterPro:IPR000883	P	Cytochrome c oxidase subunit 1	CO1	protein	taxon:79674	20180714	InterPro
UniProtKB	A0A0G2STI6	CO1		GO:0016020	GO_REF:0000038	IEA	UniProtKB-KW:KW-0472	C	Cytochrome c oxidase subunit 1	CO1	protein	taxon:79674	20180714	UniProt
UniProtKB	A0A0G2STI6	CO1		GO:0016021	GO_REF:0000002	IEA	InterPro:IPR000883	C	Cytochrome c oxidase subunit 1	CO1	protein	taxon:79674	20180714	InterPro
UniProtKB	A0A0G2STI6	CO1		GO:0016021	GO_REF:0000038	IEA	UniProtKB-KW:KW-0812	C	Cytochrome c oxidase subunit 1	CO1	protein	taxon:79674	20180714	UniProt
UniProtKB	A0A0G2STI6	CO1		GO:0016491	GO_REF:0000038	IEA	UniProtKB-KW:KW-0560	F	Cytochrome c oxidase subunit 1	CO1	protein	taxon:79674	20180714	UniProt
UniProtKB	A0A0G2STI6	CO1		GO:0020037	GO_REF:0000002	IEA	InterPro:IPR000883	F	Cytochrome c oxidase subunit 1	CO1	protein	taxon:79674	20180714	InterPro
UniProtKB	A0A0G2STI6	CO1		GO:0022900	GO_REF:0000108	IEA	GO:0004129	P	Cytochrome c oxidase subunit 1	CO1	protein	taxon:79674	20180714	GOC
UniProtKB	A0A0G2STI6	CO1		GO:0046872	GO_REF:0000038	IEA	UniProtKB-KW:KW-0479	F	Cytochrome c oxidase subunit 1	CO1	protein	taxon:79674	20180714	UniProt
UniProtKB	A0A0G2STI6	CO1		GO:0055114	GO_REF:0000002	IEA	InterPro:IPR000883|InterPro:IPR023616|InterPro:IPR036927	P	Cytochrome c oxidase subunit 1	CO1	protein	taxon:79674	20180714	InterPro
UniProtKB	A0A0G2STI6	CO1		GO:0055114	GO_REF:0000038	IEA	UniProtKB-KW:KW-0249	P	Cytochrome c oxidase subunit 1	CO1	protein	taxon:79674	20180714	UniProt
UniProtKB	A0A0G2STI6	CO1		GO:0055114	GO_REF:0000038	IEA	UniProtKB-KW:KW-0560	P	Cytochrome c oxidase subunit 1	CO1	protein	taxon:79674	20180714	UniProt
UniProtKB	A0A0G2STI6	CO1		GO:0070469	GO_REF:0000038	IEA	UniProtKB-KW:KW-0679	C	Cytochrome c oxidase subunit 1	CO1	protein	taxon:79674	20180714	UniProt
UniProtKB	A0A0G2STI6	CO1		GO:1902600	GO_REF:0000108	IEA	GO:0004129	P	Cytochrome c oxidase subunit 1	CO1	protein	taxon:79674	20180714	GOC
UniProtKB	A0A0G2STI7	CO1		GO:0004129	GO_REF:0000002	IEA	InterPro:IPR000883|InterPro:IPR023616	F	Cytochrome c oxidase subunit 1	CO1	protein	taxon:79674	20180714	InterPro
UniProtKB	A0A0G2STI7	CO1		GO:0004129	GO_REF:0000003	IEA	EC:1.9.3.1	F	Cytochrome c oxidase subunit 1	CO1	protein	taxon:79674	20180714	UniProt
UniProtKB	A0A0G2STI7	CO1		GO:0005739	GO_REF:0000038	IEA	UniProtKB-KW:KW-0496	C	Cytochrome c oxidase subunit 1	CO1	protein	taxon:79674	20180714	UniProt
UniProtKB	A0A0G2STI7	CO1		GO:0005743	GO_REF:0000038	IEA	UniProtKB-KW:KW-0999	C	Cytochrome c oxidase subunit 1	CO1	protein	taxon:79674	20180714	UniProt
UniProtKB	A0A0G2STI7	CO1		GO:0005743	GO_REF:0000040	IEA	UniProtKB-SubCell:SL-0168	C	Cytochrome c oxidase subunit 1	CO1	protein	taxon:79674	20180714	UniProt
UniProtKB	A0A0G2STI7	CO1		GO:0006119	GO_REF:0000041	IEA	UniPathway:UPA00705	P	Cytochrome c oxidase subunit 1	CO1	protein	taxon:79674	20180714	UniProt
UniProtKB	A0A0G2STI7	CO1		GO:0009060	GO_REF:0000002	IEA	InterPro:IPR000883	P	Cytochrome c oxidase subunit 1	CO1	protein	taxon:79674	20180714	InterPro
UniProtKB	A0A0G2STI7	CO1		GO:0016020	GO_REF:0000038	IEA	UniProtKB-KW:KW-0472	C	Cytochrome c oxidase subunit 1	CO1	protein	taxon:79674	20180714	UniProt
UniProtKB	A0A0G2STI7	CO1		GO:0016021	GO_REF:0000002	IEA	InterPro:IPR000883	C	Cytochrome c oxidase subunit 1	CO1	protein	taxon:79674	20180714	InterPro
UniProtKB	A0A0G2STI7	CO1		GO:0016021	GO_REF:0000038	IEA	UniProtKB-KW:KW-0812	C	Cytochrome c oxidase subunit 1	CO1	protein	taxon:79674	20180714	UniProt
UniProtKB	A0A0G2STI7	CO1		GO:0016491	GO_REF:0000038	IEA	UniProtKB-KW:KW-0560	F	Cytochrome c oxidase subunit 1	CO1	protein	taxon:79674	20180714	UniProt
UniProtKB	A0A0G2STI7	CO1		GO:0020037	GO_REF:0000002	IEA	InterPro:IPR000883	F	Cytochrome c oxidase subunit 1	CO1	protein	taxon:79674	20180714	InterPro
UniProtKB	A0A0G2STI7	CO1		GO:0022900	GO_REF:0000108	IEA	GO:0004129	P	Cytochrome c oxidase subunit 1	CO1	protein	taxon:79674	20180714	GOC
UniProtKB	A0A0G2STI7	CO1		GO:0046872	GO_REF:0000038	IEA	UniProtKB-KW:KW-0479	F	Cytochrome c oxidase subunit 1	CO1	protein	taxon:79674	20180714	UniProt
UniProtKB	A0A0G2STI7	CO1		GO:0055114	GO_REF:0000002	IEA	InterPro:IPR000883|InterPro:IPR023616|InterPro:IPR036927	P	Cytochrome c oxidase subunit 1	CO1	protein	taxon:79674	20180714	InterPro
UniProtKB	A0A0G2STI7	CO1		GO:0055114	GO_REF:0000038	IEA	UniProtKB-KW:KW-0249	P	Cytochrome c oxidase subunit 1	CO1	protein	taxon:79674	20180714	UniProt
UniProtKB	A0A0G2STI7	CO1		GO:0055114	GO_REF:0000038	IEA	UniProtKB-KW:KW-0560	P	Cytochrome c oxidase subunit 1	CO1	protein	taxon:79674	20180714	UniProt
UniProtKB	A0A0G2STI7	CO1		GO:0070469	GO_REF:0000038	IEA	UniProtKB-KW:KW-0679	C	Cytochrome c oxidase subunit 1	CO1	protein	taxon:79674	20180714	UniProt
UniProtKB	A0A0G2STI7	CO1		GO:1902600	GO_REF:0000108	IEA	GO:0004129	P	Cytochrome c oxidase subunit 1	CO1	protein	taxon:79674	20180714	GOC
UniProtKB	A0A0G2STI8	CO1		GO:0004129	GO_REF:0000002	IEA	InterPro:IPR000883|InterPro:IPR023616	F	Cytochrome c oxidase subunit 1	CO1	protein	taxon:79674	20180714	InterPro
UniProtKB	A0A0G2STI8	CO1		GO:0004129	GO_REF:0000003	IEA	EC:1.9.3.1	F	Cytochrome c oxidase subunit 1	CO1	protein	taxon:79674	20180714	UniProt
UniProtKB	A0A0G2STI8	CO1		GO:0005739	GO_REF:0000038	IEA	UniProtKB-KW:KW-0496	C	Cytochrome c oxidase subunit 1	CO1	protein	taxon:79674	20180714	UniProt
UniProtKB	A0A0G2STI8	CO1		GO:0005743	GO_REF:0000038	IEA	UniProtKB-KW:KW-0999	C	Cytochrome c oxidase subunit 1	CO1	protein	taxon:79674	20180714	UniProt
UniProtKB	A0A0G2STI8	CO1		GO:0005743	GO_REF:0000040	IEA	UniProtKB-SubCell:SL-0168	C	Cytochrome c oxidase subunit 1	CO1	protein	taxon:79674	20180714	UniProt
UniProtKB	A0A0G2STI8	CO1		GO:0006119	GO_REF:0000041	IEA	UniPathway:UPA00705	P	Cytochrome c oxidase subunit 1	CO1	protein	taxon:79674	20180714	UniProt
UniProtKB	A0A0G2STI8	CO1		GO:0009060	GO_REF:0000002	IEA	InterPro:IPR000883	P	Cytochrome c oxidase subunit 1	CO1	protein	taxon:79674	20180714	InterPro
UniProtKB	A0A0G2STI8	CO1		GO:0016020	GO_REF:0000038	IEA	UniProtKB-KW:KW-0472	C	Cytochrome c oxidase subunit 1	CO1	protein	taxon:79674	20180714	UniProt
UniProtKB	A0A0G2STI8	CO1		GO:0016021	GO_REF:0000002	IEA	InterPro:IPR000883	C	Cytochrome c oxidase subunit 1	CO1	protein	taxon:79674	20180714	InterPro
UniProtKB	A0A0G2STI8	CO1		GO:0016021	GO_REF:0000038	IEA	UniProtKB-KW:KW-0812	C	Cytochrome c oxidase subunit 1	CO1	protein	taxon:79674	20180714	UniProt
UniProtKB	A0A0G2STI8	CO1		GO:0016491	GO_REF:0000038	IEA	UniProtKB-KW:KW-0560	F	Cytochrome c oxidase subunit 1	CO1	protein	taxon:79674	20180714	UniProt
UniProtKB	A0A0G2STI8	CO1		GO:0020037	GO_REF:0000002	IEA	InterPro:IPR000883	F	Cytochrome c oxidase subunit 1	CO1	protein	taxon:79674	20180714	InterPro
UniProtKB	A0A0G2STI8	CO1		GO:0022900	GO_REF:0000108	IEA	GO:0004129	P	Cytochrome c oxidase subunit 1	CO1	protein	taxon:79674	20180714	GOC
UniProtKB	A0A0G2STI8	CO1		GO:0046872	GO_REF:0000038	IEA	UniProtKB-KW:KW-0479	F	Cytochrome c oxidase subunit 1	CO1	protein	taxon:79674	20180714	UniProt
UniProtKB	A0A0G2STI8	CO1		GO:0055114	GO_REF:0000002	IEA	InterPro:IPR000883|InterPro:IPR023616|InterPro:IPR036927	P	Cytochrome c oxidase subunit 1	CO1	protein	taxon:79674	20180714	InterPro
UniProtKB	A0A0G2STI8	CO1		GO:0055114	GO_REF:0000038	IEA	UniProtKB-KW:KW-0249	P	Cytochrome c oxidase subunit 1	CO1	protein	taxon:79674	20180714	UniProt
UniProtKB	A0A0G2STI8	CO1		GO:0055114	GO_REF:0000038	IEA	UniProtKB-KW:KW-0560	P	Cytochrome c oxidase subunit 1	CO1	protein	taxon:79674	20180714	UniProt
UniProtKB	A0A0G2STI8	CO1		GO:0070469	GO_REF:0000038	IEA	UniProtKB-KW:KW-0679	C	Cytochrome c oxidase subunit 1	CO1	protein	taxon:79674	20180714	UniProt
UniProtKB	A0A0G2STI8	CO1		GO:1902600	GO_REF:0000108	IEA	GO:0004129	P	Cytochrome c oxidase subunit 1	CO1	protein	taxon:79674	20180714	GOC
UniProtKB	A0A0G2STI9	CO1		GO:0004129	GO_REF:0000002	IEA	InterPro:IPR000883|InterPro:IPR023616	F	Cytochrome c oxidase subunit 1	CO1	protein	taxon:79674	20180714	InterPro
UniProtKB	A0A0G2STI9	CO1		GO:0004129	GO_REF:0000003	IEA	EC:1.9.3.1	F	Cytochrome c oxidase subunit 1	CO1	protein	taxon:79674	20180714	UniProt
UniProtKB	A0A0G2STI9	CO1		GO:0005739	GO_REF:0000038	IEA	UniProtKB-KW:KW-0496	C	Cytochrome c oxidase subunit 1	CO1	protein	taxon:79674	20180714	UniProt
UniProtKB	A0A0G2STI9	CO1		GO:0005743	GO_REF:0000038	IEA	UniProtKB-KW:KW-0999	C	Cytochrome c oxidase subunit 1	CO1	protein	taxon:79674	20180714	UniProt
UniProtKB	A0A0G2STI9	CO1		GO:0005743	GO_REF:0000040	IEA	UniProtKB-SubCell:SL-0168	C	Cytochrome c oxidase subunit 1	CO1	protein	taxon:79674	20180714	UniProt
UniProtKB	A0A0G2STI9	CO1		GO:0006119	GO_REF:0000041	IEA	UniPathway:UPA00705	P	Cytochrome c oxidase subunit 1	CO1	protein	taxon:79674	20180714	UniProt
UniProtKB	A0A0G2STI9	CO1		GO:0009060	GO_REF:0000002	IEA	InterPro:IPR000883	P	Cytochrome c oxidase subunit 1	CO1	protein	taxon:79674	20180714	InterPro
UniProtKB	A0A0G2STI9	CO1		GO:0016020	GO_REF:0000038	IEA	UniProtKB-KW:KW-0472	C	Cytochrome c oxidase subunit 1	CO1	protein	taxon:79674	20180714	UniProt
UniProtKB	A0A0G2STI9	CO1		GO:0016021	GO_REF:0000002	IEA	InterPro:IPR000883	C	Cytochrome c oxidase subunit 1	CO1	protein	taxon:79674	20180714	InterPro
UniProtKB	A0A0G2STI9	CO1		GO:0016021	GO_REF:0000038	IEA	UniProtKB-KW:KW-0812	C	Cytochrome c oxidase subunit 1	CO1	protein	taxon:79674	20180714	UniProt
UniProtKB	A0A0G2STI9	CO1		GO:0016491	GO_REF:0000038	IEA	UniProtKB-KW:KW-0560	F	Cytochrome c oxidase subunit 1	CO1	protein	taxon:79674	20180714	UniProt
UniProtKB	A0A0G2STI9	CO1		GO:0020037	GO_REF:0000002	IEA	InterPro:IPR000883	F	Cytochrome c oxidase subunit 1	CO1	protein	taxon:79674	20180714	InterPro
UniProtKB	A0A0G2STI9	CO1		GO:0022900	GO_REF:0000108	IEA	GO:0004129	P	Cytochrome c oxidase subunit 1	CO1	protein	taxon:79674	20180714	GOC
UniProtKB	A0A0G2STI9	CO1		GO:0046872	GO_REF:0000038	IEA	UniProtKB-KW:KW-0479	F	Cytochrome c oxidase subunit 1	CO1	protein	taxon:79674	20180714	UniProt
UniProtKB	A0A0G2STI9	CO1		GO:0055114	GO_REF:0000002	IEA	InterPro:IPR000883|InterPro:IPR023616|InterPro:IPR036927	P	Cytochrome c oxidase subunit 1	CO1	protein	taxon:79674	20180714	InterPro
UniProtKB	A0A0G2STI9	CO1		GO:0055114	GO_REF:0000038	IEA	UniProtKB-KW:KW-0249	P	Cytochrome c oxidase subunit 1	CO1	protein	taxon:79674	20180714	UniProt
UniProtKB	A0A0G2STI9	CO1		GO:0055114	GO_REF:0000038	IEA	UniProtKB-KW:KW-0560	P	Cytochrome c oxidase subunit 1	CO1	protein	taxon:79674	20180714	UniProt
UniProtKB	A0A0G2STI9	CO1		GO:0070469	GO_REF:0000038	IEA	UniProtKB-KW:KW-0679	C	Cytochrome c oxidase subunit 1	CO1	protein	taxon:79674	20180714	UniProt
UniProtKB	A0A0G2STI9	CO1		GO:1902600	GO_REF:0000108	IEA	GO:0004129	P	Cytochrome c oxidase subunit 1	CO1	protein	taxon:79674	20180714	GOC
UniProtKB	A0A0G2STJ0	CO1		GO:0004129	GO_REF:0000002	IEA	InterPro:IPR000883|InterPro:IPR023616	F	Cytochrome c oxidase subunit 1	CO1	protein	taxon:79674	20180714	InterPro
UniProtKB	A0A0G2STJ0	CO1		GO:0004129	GO_REF:0000003	IEA	EC:1.9.3.1	F	Cytochrome c oxidase subunit 1	CO1	protein	taxon:79674	20180714	UniProt
UniProtKB	A0A0G2STJ0	CO1		GO:0005739	GO_REF:0000038	IEA	UniProtKB-KW:KW-0496	C	Cytochrome c oxidase subunit 1	CO1	protein	taxon:79674	20180714	UniProt
UniProtKB	A0A0G2STJ0	CO1		GO:0005743	GO_REF:0000038	IEA	UniProtKB-KW:KW-0999	C	Cytochrome c oxidase subunit 1	CO1	protein	taxon:79674	20180714	UniProt
UniProtKB	A0A0G2STJ0	CO1		GO:0005743	GO_REF:0000040	IEA	UniProtKB-SubCell:SL-0168	C	Cytochrome c oxidase subunit 1	CO1	protein	taxon:79674	20180714	UniProt
UniProtKB	A0A0G2STJ0	CO1		GO:0006119	GO_REF:0000041	IEA	UniPathway:UPA00705	P	Cytochrome c oxidase subunit 1	CO1	protein	taxon:79674	20180714	UniProt
UniProtKB	A0A0G2STJ0	CO1		GO:0009060	GO_REF:0000002	IEA	InterPro:IPR000883	P	Cytochrome c oxidase subunit 1	CO1	protein	taxon:79674	20180714	InterPro
UniProtKB	A0A0G2STJ0	CO1		GO:0016020	GO_REF:0000038	IEA	UniProtKB-KW:KW-0472	C	Cytochrome c oxidase subunit 1	CO1	protein	taxon:79674	20180714	UniProt
UniProtKB	A0A0G2STJ0	CO1		GO:0016021	GO_REF:0000002	IEA	InterPro:IPR000883	C	Cytochrome c oxidase subunit 1	CO1	protein	taxon:79674	20180714	InterPro
UniProtKB	A0A0G2STJ0	CO1		GO:0016021	GO_REF:0000038	IEA	UniProtKB-KW:KW-0812	C	Cytochrome c oxidase subunit 1	CO1	protein	taxon:79674	20180714	UniProt
UniProtKB	A0A0G2STJ0	CO1		GO:0016491	GO_REF:0000038	IEA	UniProtKB-KW:KW-0560	F	Cytochrome c oxidase subunit 1	CO1	protein	taxon:79674	20180714	UniProt
UniProtKB	A0A0G2STJ0	CO1		GO:0020037	GO_REF:0000002	IEA	InterPro:IPR000883	F	Cytochrome c oxidase subunit 1	CO1	protein	taxon:79674	20180714	InterPro
UniProtKB	A0A0G2STJ0	CO1		GO:0022900	GO_REF:0000108	IEA	GO:0004129	P	Cytochrome c oxidase subunit 1	CO1	protein	taxon:79674	20180714	GOC
UniProtKB	A0A0G2STJ0	CO1		GO:0046872	GO_REF:0000038	IEA	UniProtKB-KW:KW-0479	F	Cytochrome c oxidase subunit 1	CO1	protein	taxon:79674	20180714	UniProt
UniProtKB	A0A0G2STJ0	CO1		GO:0055114	GO_REF:0000002	IEA	InterPro:IPR000883|InterPro:IPR023616|InterPro:IPR036927	P	Cytochrome c oxidase subunit 1	CO1	protein	taxon:79674	20180714	InterPro
UniProtKB	A0A0G2STJ0	CO1		GO:0055114	GO_REF:0000038	IEA	UniProtKB-KW:KW-0249	P	Cytochrome c oxidase subunit 1	CO1	protein	taxon:79674	20180714	UniProt
UniProtKB	A0A0G2STJ0	CO1		GO:0055114	GO_REF:0000038	IEA	UniProtKB-KW:KW-0560	P	Cytochrome c oxidase subunit 1	CO1	protein	taxon:79674	20180714	UniProt
UniProtKB	A0A0G2STJ0	CO1		GO:0070469	GO_REF:0000038	IEA	UniProtKB-KW:KW-0679	C	Cytochrome c oxidase subunit 1	CO1	protein	taxon:79674	20180714	UniProt
UniProtKB	A0A0G2STJ0	CO1		GO:1902600	GO_REF:0000108	IEA	GO:0004129	P	Cytochrome c oxidase subunit 1	CO1	protein	taxon:79674	20180714	GOC
UniProtKB	A0A0G2STL4	CO1		GO:0004129	GO_REF:0000002	IEA	InterPro:IPR000883|InterPro:IPR023616	F	Cytochrome c oxidase subunit 1	CO1	protein	taxon:79674	20180714	InterPro
UniProtKB	A0A0G2STL4	CO1		GO:0004129	GO_REF:0000003	IEA	EC:1.9.3.1	F	Cytochrome c oxidase subunit 1	CO1	protein	taxon:79674	20180714	UniProt
UniProtKB	A0A0G2STL4	CO1		GO:0005739	GO_REF:0000038	IEA	UniProtKB-KW:KW-0496	C	Cytochrome c oxidase subunit 1	CO1	protein	taxon:79674	20180714	UniProt
UniProtKB	A0A0G2STL4	CO1		GO:0005743	GO_REF:0000038	IEA	UniProtKB-KW:KW-0999	C	Cytochrome c oxidase subunit 1	CO1	protein	taxon:79674	20180714	UniProt
UniProtKB	A0A0G2STL4	CO1		GO:0005743	GO_REF:0000040	IEA	UniProtKB-SubCell:SL-0168	C	Cytochrome c oxidase subunit 1	CO1	protein	taxon:79674	20180714	UniProt
UniProtKB	A0A0G2STL4	CO1		GO:0006119	GO_REF:0000041	IEA	UniPathway:UPA00705	P	Cytochrome c oxidase subunit 1	CO1	protein	taxon:79674	20180714	UniProt
UniProtKB	A0A0G2STL4	CO1		GO:0009060	GO_REF:0000002	IEA	InterPro:IPR000883	P	Cytochrome c oxidase subunit 1	CO1	protein	taxon:79674	20180714	InterPro
UniProtKB	A0A0G2STL4	CO1		GO:0016020	GO_REF:0000038	IEA	UniProtKB-KW:KW-0472	C	Cytochrome c oxidase subunit 1	CO1	protein	taxon:79674	20180714	UniProt
UniProtKB	A0A0G2STL4	CO1		GO:0016021	GO_REF:0000002	IEA	InterPro:IPR000883	C	Cytochrome c oxidase subunit 1	CO1	protein	taxon:79674	20180714	InterPro
UniProtKB	A0A0G2STL4	CO1		GO:0016021	GO_REF:0000038	IEA	UniProtKB-KW:KW-0812	C	Cytochrome c oxidase subunit 1	CO1	protein	taxon:79674	20180714	UniProt
UniProtKB	A0A0G2STL4	CO1		GO:0016491	GO_REF:0000038	IEA	UniProtKB-KW:KW-0560	F	Cytochrome c oxidase subunit 1	CO1	protein	taxon:79674	20180714	UniProt
UniProtKB	A0A0G2STL4	CO1		GO:0020037	GO_REF:0000002	IEA	InterPro:IPR000883	F	Cytochrome c oxidase subunit 1	CO1	protein	taxon:79674	20180714	InterPro
UniProtKB	A0A0G2STL4	CO1		GO:0022900	GO_REF:0000108	IEA	GO:0004129	P	Cytochrome c oxidase subunit 1	CO1	protein	taxon:79674	20180714	GOC
UniProtKB	A0A0G2STL4	CO1		GO:0046872	GO_REF:0000038	IEA	UniProtKB-KW:KW-0479	F	Cytochrome c oxidase subunit 1	CO1	protein	taxon:79674	20180714	UniProt
UniProtKB	A0A0G2STL4	CO1		GO:0055114	GO_REF:0000002	IEA	InterPro:IPR000883|InterPro:IPR023616|InterPro:IPR036927	P	Cytochrome c oxidase subunit 1	CO1	protein	taxon:79674	20180714	InterPro
UniProtKB	A0A0G2STL4	CO1		GO:0055114	GO_REF:0000038	IEA	UniProtKB-KW:KW-0249	P	Cytochrome c oxidase subunit 1	CO1	protein	taxon:79674	20180714	UniProt
UniProtKB	A0A0G2STL4	CO1		GO:0055114	GO_REF:0000038	IEA	UniProtKB-KW:KW-0560	P	Cytochrome c oxidase subunit 1	CO1	protein	taxon:79674	20180714	UniProt
UniProtKB	A0A0G2STL4	CO1		GO:0070469	GO_REF:0000038	IEA	UniProtKB-KW:KW-0679	C	Cytochrome c oxidase subunit 1	CO1	protein	taxon:79674	20180714	UniProt
UniProtKB	A0A0G2STL4	CO1		GO:1902600	GO_REF:0000108	IEA	GO:0004129	P	Cytochrome c oxidase subunit 1	CO1	protein	taxon:79674	20180714	GOC
UniProtKB	A0A0G2STL5	CO1		GO:0004129	GO_REF:0000002	IEA	InterPro:IPR000883|InterPro:IPR023616	F	Cytochrome c oxidase subunit 1	CO1	protein	taxon:79674	20180714	InterPro
UniProtKB	A0A0G2STL5	CO1		GO:0004129	GO_REF:0000003	IEA	EC:1.9.3.1	F	Cytochrome c oxidase subunit 1	CO1	protein	taxon:79674	20180714	UniProt
UniProtKB	A0A0G2STL5	CO1		GO:0005739	GO_REF:0000038	IEA	UniProtKB-KW:KW-0496	C	Cytochrome c oxidase subunit 1	CO1	protein	taxon:79674	20180714	UniProt
UniProtKB	A0A0G2STL5	CO1		GO:0005743	GO_REF:0000038	IEA	UniProtKB-KW:KW-0999	C	Cytochrome c oxidase subunit 1	CO1	protein	taxon:79674	20180714	UniProt
UniProtKB	A0A0G2STL5	CO1		GO:0005743	GO_REF:0000040	IEA	UniProtKB-SubCell:SL-0168	C	Cytochrome c oxidase subunit 1	CO1	protein	taxon:79674	20180714	UniProt
UniProtKB	A0A0G2STL5	CO1		GO:0006119	GO_REF:0000041	IEA	UniPathway:UPA00705	P	Cytochrome c oxidase subunit 1	CO1	protein	taxon:79674	20180714	UniProt
UniProtKB	A0A0G2STL5	CO1		GO:0009060	GO_REF:0000002	IEA	InterPro:IPR000883	P	Cytochrome c oxidase subunit 1	CO1	protein	taxon:79674	20180714	InterPro
UniProtKB	A0A0G2STL5	CO1		GO:0016020	GO_REF:0000038	IEA	UniProtKB-KW:KW-0472	C	Cytochrome c oxidase subunit 1	CO1	protein	taxon:79674	20180714	UniProt
UniProtKB	A0A0G2STL5	CO1		GO:0016021	GO_REF:0000002	IEA	InterPro:IPR000883	C	Cytochrome c oxidase subunit 1	CO1	protein	taxon:79674	20180714	InterPro
UniProtKB	A0A0G2STL5	CO1		GO:0016021	GO_REF:0000038	IEA	UniProtKB-KW:KW-0812	C	Cytochrome c oxidase subunit 1	CO1	protein	taxon:79674	20180714	UniProt
UniProtKB	A0A0G2STL5	CO1		GO:0016491	GO_REF:0000038	IEA	UniProtKB-KW:KW-0560	F	Cytochrome c oxidase subunit 1	CO1	protein	taxon:79674	20180714	UniProt
UniProtKB	A0A0G2STL5	CO1		GO:0020037	GO_REF:0000002	IEA	InterPro:IPR000883	F	Cytochrome c oxidase subunit 1	CO1	protein	taxon:79674	20180714	InterPro
UniProtKB	A0A0G2STL5	CO1		GO:0022900	GO_REF:0000108	IEA	GO:0004129	P	Cytochrome c oxidase subunit 1	CO1	protein	taxon:79674	20180714	GOC
UniProtKB	A0A0G2STL5	CO1		GO:0046872	GO_REF:0000038	IEA	UniProtKB-KW:KW-0479	F	Cytochrome c oxidase subunit 1	CO1	protein	taxon:79674	20180714	UniProt
UniProtKB	A0A0G2STL5	CO1		GO:0055114	GO_REF:0000002	IEA	InterPro:IPR000883|InterPro:IPR023616|InterPro:IPR036927	P	Cytochrome c oxidase subunit 1	CO1	protein	taxon:79674	20180714	InterPro
UniProtKB	A0A0G2STL5	CO1		GO:0055114	GO_REF:0000038	IEA	UniProtKB-KW:KW-0249	P	Cytochrome c oxidase subunit 1	CO1	protein	taxon:79674	20180714	UniProt
UniProtKB	A0A0G2STL5	CO1		GO:0055114	GO_REF:0000038	IEA	UniProtKB-KW:KW-0560	P	Cytochrome c oxidase subunit 1	CO1	protein	taxon:79674	20180714	UniProt
UniProtKB	A0A0G2STL5	CO1		GO:0070469	GO_REF:0000038	IEA	UniProtKB-KW:KW-0679	C	Cytochrome c oxidase subunit 1	CO1	protein	taxon:79674	20180714	UniProt
UniProtKB	A0A0G2STL5	CO1		GO:1902600	GO_REF:0000108	IEA	GO:0004129	P	Cytochrome c oxidase subunit 1	CO1	protein	taxon:79674	20180714	GOC
UniProtKB	A0A0G2STL6	CO1		GO:0004129	GO_REF:0000002	IEA	InterPro:IPR000883|InterPro:IPR023616	F	Cytochrome c oxidase subunit 1	CO1	protein	taxon:79674	20180714	InterPro
UniProtKB	A0A0G2STL6	CO1		GO:0004129	GO_REF:0000003	IEA	EC:1.9.3.1	F	Cytochrome c oxidase subunit 1	CO1	protein	taxon:79674	20180714	UniProt
UniProtKB	A0A0G2STL6	CO1		GO:0005739	GO_REF:0000038	IEA	UniProtKB-KW:KW-0496	C	Cytochrome c oxidase subunit 1	CO1	protein	taxon:79674	20180714	UniProt
UniProtKB	A0A0G2STL6	CO1		GO:0005743	GO_REF:0000038	IEA	UniProtKB-KW:KW-0999	C	Cytochrome c oxidase subunit 1	CO1	protein	taxon:79674	20180714	UniProt
UniProtKB	A0A0G2STL6	CO1		GO:0005743	GO_REF:0000040	IEA	UniProtKB-SubCell:SL-0168	C	Cytochrome c oxidase subunit 1	CO1	protein	taxon:79674	20180714	UniProt
UniProtKB	A0A0G2STL6	CO1		GO:0006119	GO_REF:0000041	IEA	UniPathway:UPA00705	P	Cytochrome c oxidase subunit 1	CO1	protein	taxon:79674	20180714	UniProt
UniProtKB	A0A0G2STL6	CO1		GO:0009060	GO_REF:0000002	IEA	InterPro:IPR000883	P	Cytochrome c oxidase subunit 1	CO1	protein	taxon:79674	20180714	InterPro
UniProtKB	A0A0G2STL6	CO1		GO:0016020	GO_REF:0000038	IEA	UniProtKB-KW:KW-0472	C	Cytochrome c oxidase subunit 1	CO1	protein	taxon:79674	20180714	UniProt
UniProtKB	A0A0G2STL6	CO1		GO:0016021	GO_REF:0000002	IEA	InterPro:IPR000883	C	Cytochrome c oxidase subunit 1	CO1	protein	taxon:79674	20180714	InterPro
UniProtKB	A0A0G2STL6	CO1		GO:0016021	GO_REF:0000038	IEA	UniProtKB-KW:KW-0812	C	Cytochrome c oxidase subunit 1	CO1	protein	taxon:79674	20180714	UniProt
UniProtKB	A0A0G2STL6	CO1		GO:0016491	GO_REF:0000038	IEA	UniProtKB-KW:KW-0560	F	Cytochrome c oxidase subunit 1	CO1	protein	taxon:79674	20180714	UniProt
UniProtKB	A0A0G2STL6	CO1		GO:0020037	GO_REF:0000002	IEA	InterPro:IPR000883	F	Cytochrome c oxidase subunit 1	CO1	protein	taxon:79674	20180714	InterPro
UniProtKB	A0A0G2STL6	CO1		GO:0022900	GO_REF:0000108	IEA	GO:0004129	P	Cytochrome c oxidase subunit 1	CO1	protein	taxon:79674	20180714	GOC
UniProtKB	A0A0G2STL6	CO1		GO:0046872	GO_REF:0000038	IEA	UniProtKB-KW:KW-0479	F	Cytochrome c oxidase subunit 1	CO1	protein	taxon:79674	20180714	UniProt
UniProtKB	A0A0G2STL6	CO1		GO:0055114	GO_REF:0000002	IEA	InterPro:IPR000883|InterPro:IPR023616|InterPro:IPR036927	P	Cytochrome c oxidase subunit 1	CO1	protein	taxon:79674	20180714	InterPro
UniProtKB	A0A0G2STL6	CO1		GO:0055114	GO_REF:0000038	IEA	UniProtKB-KW:KW-0249	P	Cytochrome c oxidase subunit 1	CO1	protein	taxon:79674	20180714	UniProt
UniProtKB	A0A0G2STL6	CO1		GO:0055114	GO_REF:0000038	IEA	UniProtKB-KW:KW-0560	P	Cytochrome c oxidase subunit 1	CO1	protein	taxon:79674	20180714	UniProt
UniProtKB	A0A0G2STL6	CO1		GO:0070469	GO_REF:0000038	IEA	UniProtKB-KW:KW-0679	C	Cytochrome c oxidase subunit 1	CO1	protein	taxon:79674	20180714	UniProt
UniProtKB	A0A0G2STL6	CO1		GO:1902600	GO_REF:0000108	IEA	GO:0004129	P	Cytochrome c oxidase subunit 1	CO1	protein	taxon:79674	20180714	GOC
UniProtKB	A0A0G2STM0	CO1		GO:0004129	GO_REF:0000002	IEA	InterPro:IPR000883|InterPro:IPR023616	F	Cytochrome c oxidase subunit 1	CO1	protein	taxon:79674	20180714	InterPro
UniProtKB	A0A0G2STM0	CO1		GO:0004129	GO_REF:0000003	IEA	EC:1.9.3.1	F	Cytochrome c oxidase subunit 1	CO1	protein	taxon:79674	20180714	UniProt
UniProtKB	A0A0G2STM0	CO1		GO:0005739	GO_REF:0000038	IEA	UniProtKB-KW:KW-0496	C	Cytochrome c oxidase subunit 1	CO1	protein	taxon:79674	20180714	UniProt
UniProtKB	A0A0G2STM0	CO1		GO:0005743	GO_REF:0000038	IEA	UniProtKB-KW:KW-0999	C	Cytochrome c oxidase subunit 1	CO1	protein	taxon:79674	20180714	UniProt
UniProtKB	A0A0G2STM0	CO1		GO:0005743	GO_REF:0000040	IEA	UniProtKB-SubCell:SL-0168	C	Cytochrome c oxidase subunit 1	CO1	protein	taxon:79674	20180714	UniProt
UniProtKB	A0A0G2STM0	CO1		GO:0006119	GO_REF:0000041	IEA	UniPathway:UPA00705	P	Cytochrome c oxidase subunit 1	CO1	protein	taxon:79674	20180714	UniProt
UniProtKB	A0A0G2STM0	CO1		GO:0009060	GO_REF:0000002	IEA	InterPro:IPR000883	P	Cytochrome c oxidase subunit 1	CO1	protein	taxon:79674	20180714	InterPro
UniProtKB	A0A0G2STM0	CO1		GO:0016020	GO_REF:0000038	IEA	UniProtKB-KW:KW-0472	C	Cytochrome c oxidase subunit 1	CO1	protein	taxon:79674	20180714	UniProt
UniProtKB	A0A0G2STM0	CO1		GO:0016021	GO_REF:0000002	IEA	InterPro:IPR000883	C	Cytochrome c oxidase subunit 1	CO1	protein	taxon:79674	20180714	InterPro
UniProtKB	A0A0G2STM0	CO1		GO:0016021	GO_REF:0000038	IEA	UniProtKB-KW:KW-0812	C	Cytochrome c oxidase subunit 1	CO1	protein	taxon:79674	20180714	UniProt
UniProtKB	A0A0G2STM0	CO1		GO:0016491	GO_REF:0000038	IEA	UniProtKB-KW:KW-0560	F	Cytochrome c oxidase subunit 1	CO1	protein	taxon:79674	20180714	UniProt
UniProtKB	A0A0G2STM0	CO1		GO:0020037	GO_REF:0000002	IEA	InterPro:IPR000883	F	Cytochrome c oxidase subunit 1	CO1	protein	taxon:79674	20180714	InterPro
UniProtKB	A0A0G2STM0	CO1		GO:0022900	GO_REF:0000108	IEA	GO:0004129	P	Cytochrome c oxidase subunit 1	CO1	protein	taxon:79674	20180714	GOC
UniProtKB	A0A0G2STM0	CO1		GO:0046872	GO_REF:0000038	IEA	UniProtKB-KW:KW-0479	F	Cytochrome c oxidase subunit 1	CO1	protein	taxon:79674	20180714	UniProt
UniProtKB	A0A0G2STM0	CO1		GO:0055114	GO_REF:0000002	IEA	InterPro:IPR000883|InterPro:IPR023616|InterPro:IPR036927	P	Cytochrome c oxidase subunit 1	CO1	protein	taxon:79674	20180714	InterPro
UniProtKB	A0A0G2STM0	CO1		GO:0055114	GO_REF:0000038	IEA	UniProtKB-KW:KW-0249	P	Cytochrome c oxidase subunit 1	CO1	protein	taxon:79674	20180714	UniProt
UniProtKB	A0A0G2STM0	CO1		GO:0055114	GO_REF:0000038	IEA	UniProtKB-KW:KW-0560	P	Cytochrome c oxidase subunit 1	CO1	protein	taxon:79674	20180714	UniProt
UniProtKB	A0A0G2STM0	CO1		GO:0070469	GO_REF:0000038	IEA	UniProtKB-KW:KW-0679	C	Cytochrome c oxidase subunit 1	CO1	protein	taxon:79674	20180714	UniProt
UniProtKB	A0A0G2STM0	CO1		GO:1902600	GO_REF:0000108	IEA	GO:0004129	P	Cytochrome c oxidase subunit 1	CO1	protein	taxon:79674	20180714	GOC
UniProtKB	A0A0G2STM1	CO1		GO:0004129	GO_REF:0000002	IEA	InterPro:IPR000883|InterPro:IPR023616	F	Cytochrome c oxidase subunit 1	CO1	protein	taxon:79674	20180714	InterPro
UniProtKB	A0A0G2STM1	CO1		GO:0004129	GO_REF:0000003	IEA	EC:1.9.3.1	F	Cytochrome c oxidase subunit 1	CO1	protein	taxon:79674	20180714	UniProt
UniProtKB	A0A0G2STM1	CO1		GO:0005739	GO_REF:0000038	IEA	UniProtKB-KW:KW-0496	C	Cytochrome c oxidase subunit 1	CO1	protein	taxon:79674	20180714	UniProt
UniProtKB	A0A0G2STM1	CO1		GO:0005743	GO_REF:0000038	IEA	UniProtKB-KW:KW-0999	C	Cytochrome c oxidase subunit 1	CO1	protein	taxon:79674	20180714	UniProt
UniProtKB	A0A0G2STM1	CO1		GO:0005743	GO_REF:0000040	IEA	UniProtKB-SubCell:SL-0168	C	Cytochrome c oxidase subunit 1	CO1	protein	taxon:79674	20180714	UniProt
UniProtKB	A0A0G2STM1	CO1		GO:0006119	GO_REF:0000041	IEA	UniPathway:UPA00705	P	Cytochrome c oxidase subunit 1	CO1	protein	taxon:79674	20180714	UniProt
UniProtKB	A0A0G2STM1	CO1		GO:0009060	GO_REF:0000002	IEA	InterPro:IPR000883	P	Cytochrome c oxidase subunit 1	CO1	protein	taxon:79674	20180714	InterPro
UniProtKB	A0A0G2STM1	CO1		GO:0016020	GO_REF:0000038	IEA	UniProtKB-KW:KW-0472	C	Cytochrome c oxidase subunit 1	CO1	protein	taxon:79674	20180714	UniProt
UniProtKB	A0A0G2STM1	CO1		GO:0016021	GO_REF:0000002	IEA	InterPro:IPR000883	C	Cytochrome c oxidase subunit 1	CO1	protein	taxon:79674	20180714	InterPro
UniProtKB	A0A0G2STM1	CO1		GO:0016021	GO_REF:0000038	IEA	UniProtKB-KW:KW-0812	C	Cytochrome c oxidase subunit 1	CO1	protein	taxon:79674	20180714	UniProt
UniProtKB	A0A0G2STM1	CO1		GO:0016491	GO_REF:0000038	IEA	UniProtKB-KW:KW-0560	F	Cytochrome c oxidase subunit 1	CO1	protein	taxon:79674	20180714	UniProt
UniProtKB	A0A0G2STM1	CO1		GO:0020037	GO_REF:0000002	IEA	InterPro:IPR000883	F	Cytochrome c oxidase subunit 1	CO1	protein	taxon:79674	20180714	InterPro
UniProtKB	A0A0G2STM1	CO1		GO:0022900	GO_REF:0000108	IEA	GO:0004129	P	Cytochrome c oxidase subunit 1	CO1	protein	taxon:79674	20180714	GOC
UniProtKB	A0A0G2STM1	CO1		GO:0046872	GO_REF:0000038	IEA	UniProtKB-KW:KW-0479	F	Cytochrome c oxidase subunit 1	CO1	protein	taxon:79674	20180714	UniProt
UniProtKB	A0A0G2STM1	CO1		GO:0055114	GO_REF:0000002	IEA	InterPro:IPR000883|InterPro:IPR023616|InterPro:IPR036927	P	Cytochrome c oxidase subunit 1	CO1	protein	taxon:79674	20180714	InterPro
UniProtKB	A0A0G2STM1	CO1		GO:0055114	GO_REF:0000038	IEA	UniProtKB-KW:KW-0249	P	Cytochrome c oxidase subunit 1	CO1	protein	taxon:79674	20180714	UniProt
UniProtKB	A0A0G2STM1	CO1		GO:0055114	GO_REF:0000038	IEA	UniProtKB-KW:KW-0560	P	Cytochrome c oxidase subunit 1	CO1	protein	taxon:79674	20180714	UniProt
UniProtKB	A0A0G2STM1	CO1		GO:0070469	GO_REF:0000038	IEA	UniProtKB-KW:KW-0679	C	Cytochrome c oxidase subunit 1	CO1	protein	taxon:79674	20180714	UniProt
UniProtKB	A0A0G2STM1	CO1		GO:1902600	GO_REF:0000108	IEA	GO:0004129	P	Cytochrome c oxidase subunit 1	CO1	protein	taxon:79674	20180714	GOC
UniProtKB	A0A0G2STM2	CO1		GO:0004129	GO_REF:0000002	IEA	InterPro:IPR000883|InterPro:IPR023616	F	Cytochrome c oxidase subunit 1	CO1	protein	taxon:79674	20180714	InterPro
UniProtKB	A0A0G2STM2	CO1		GO:0004129	GO_REF:0000003	IEA	EC:1.9.3.1	F	Cytochrome c oxidase subunit 1	CO1	protein	taxon:79674	20180714	UniProt
UniProtKB	A0A0G2STM2	CO1		GO:0005739	GO_REF:0000038	IEA	UniProtKB-KW:KW-0496	C	Cytochrome c oxidase subunit 1	CO1	protein	taxon:79674	20180714	UniProt
UniProtKB	A0A0G2STM2	CO1		GO:0005743	GO_REF:0000038	IEA	UniProtKB-KW:KW-0999	C	Cytochrome c oxidase subunit 1	CO1	protein	taxon:79674	20180714	UniProt
UniProtKB	A0A0G2STM2	CO1		GO:0005743	GO_REF:0000040	IEA	UniProtKB-SubCell:SL-0168	C	Cytochrome c oxidase subunit 1	CO1	protein	taxon:79674	20180714	UniProt
UniProtKB	A0A0G2STM2	CO1		GO:0006119	GO_REF:0000041	IEA	UniPathway:UPA00705	P	Cytochrome c oxidase subunit 1	CO1	protein	taxon:79674	20180714	UniProt
UniProtKB	A0A0G2STM2	CO1		GO:0009060	GO_REF:0000002	IEA	InterPro:IPR000883	P	Cytochrome c oxidase subunit 1	CO1	protein	taxon:79674	20180714	InterPro
UniProtKB	A0A0G2STM2	CO1		GO:0016020	GO_REF:0000038	IEA	UniProtKB-KW:KW-0472	C	Cytochrome c oxidase subunit 1	CO1	protein	taxon:79674	20180714	UniProt
UniProtKB	A0A0G2STM2	CO1		GO:0016021	GO_REF:0000002	IEA	InterPro:IPR000883	C	Cytochrome c oxidase subunit 1	CO1	protein	taxon:79674	20180714	InterPro
UniProtKB	A0A0G2STM2	CO1		GO:0016021	GO_REF:0000038	IEA	UniProtKB-KW:KW-0812	C	Cytochrome c oxidase subunit 1	CO1	protein	taxon:79674	20180714	UniProt
UniProtKB	A0A0G2STM2	CO1		GO:0016491	GO_REF:0000038	IEA	UniProtKB-KW:KW-0560	F	Cytochrome c oxidase subunit 1	CO1	protein	taxon:79674	20180714	UniProt
UniProtKB	A0A0G2STM2	CO1		GO:0020037	GO_REF:0000002	IEA	InterPro:IPR000883	F	Cytochrome c oxidase subunit 1	CO1	protein	taxon:79674	20180714	InterPro
UniProtKB	A0A0G2STM2	CO1		GO:0022900	GO_REF:0000108	IEA	GO:0004129	P	Cytochrome c oxidase subunit 1	CO1	protein	taxon:79674	20180714	GOC
UniProtKB	A0A0G2STM2	CO1		GO:0046872	GO_REF:0000038	IEA	UniProtKB-KW:KW-0479	F	Cytochrome c oxidase subunit 1	CO1	protein	taxon:79674	20180714	UniProt
UniProtKB	A0A0G2STM2	CO1		GO:0055114	GO_REF:0000002	IEA	InterPro:IPR000883|InterPro:IPR023616|InterPro:IPR036927	P	Cytochrome c oxidase subunit 1	CO1	protein	taxon:79674	20180714	InterPro
UniProtKB	A0A0G2STM2	CO1		GO:0055114	GO_REF:0000038	IEA	UniProtKB-KW:KW-0249	P	Cytochrome c oxidase subunit 1	CO1	protein	taxon:79674	20180714	UniProt
UniProtKB	A0A0G2STM2	CO1		GO:0055114	GO_REF:0000038	IEA	UniProtKB-KW:KW-0560	P	Cytochrome c oxidase subunit 1	CO1	protein	taxon:79674	20180714	UniProt
UniProtKB	A0A0G2STM2	CO1		GO:0070469	GO_REF:0000038	IEA	UniProtKB-KW:KW-0679	C	Cytochrome c oxidase subunit 1	CO1	protein	taxon:79674	20180714	UniProt
UniProtKB	A0A0G2STM2	CO1		GO:1902600	GO_REF:0000108	IEA	GO:0004129	P	Cytochrome c oxidase subunit 1	CO1	protein	taxon:79674	20180714	GOC
UniProtKB	A0A0G2STM6	CO1		GO:0004129	GO_REF:0000002	IEA	InterPro:IPR000883|InterPro:IPR023616	F	Cytochrome c oxidase subunit 1	CO1	protein	taxon:79674	20180714	InterPro
UniProtKB	A0A0G2STM6	CO1		GO:0004129	GO_REF:0000003	IEA	EC:1.9.3.1	F	Cytochrome c oxidase subunit 1	CO1	protein	taxon:79674	20180714	UniProt
UniProtKB	A0A0G2STM6	CO1		GO:0005739	GO_REF:0000038	IEA	UniProtKB-KW:KW-0496	C	Cytochrome c oxidase subunit 1	CO1	protein	taxon:79674	20180714	UniProt
UniProtKB	A0A0G2STM6	CO1		GO:0005743	GO_REF:0000038	IEA	UniProtKB-KW:KW-0999	C	Cytochrome c oxidase subunit 1	CO1	protein	taxon:79674	20180714	UniProt
UniProtKB	A0A0G2STM6	CO1		GO:0005743	GO_REF:0000040	IEA	UniProtKB-SubCell:SL-0168	C	Cytochrome c oxidase subunit 1	CO1	protein	taxon:79674	20180714	UniProt
UniProtKB	A0A0G2STM6	CO1		GO:0006119	GO_REF:0000041	IEA	UniPathway:UPA00705	P	Cytochrome c oxidase subunit 1	CO1	protein	taxon:79674	20180714	UniProt
UniProtKB	A0A0G2STM6	CO1		GO:0009060	GO_REF:0000002	IEA	InterPro:IPR000883	P	Cytochrome c oxidase subunit 1	CO1	protein	taxon:79674	20180714	InterPro
UniProtKB	A0A0G2STM6	CO1		GO:0016020	GO_REF:0000038	IEA	UniProtKB-KW:KW-0472	C	Cytochrome c oxidase subunit 1	CO1	protein	taxon:79674	20180714	UniProt
UniProtKB	A0A0G2STM6	CO1		GO:0016021	GO_REF:0000002	IEA	InterPro:IPR000883	C	Cytochrome c oxidase subunit 1	CO1	protein	taxon:79674	20180714	InterPro
UniProtKB	A0A0G2STM6	CO1		GO:0016021	GO_REF:0000038	IEA	UniProtKB-KW:KW-0812	C	Cytochrome c oxidase subunit 1	CO1	protein	taxon:79674	20180714	UniProt
UniProtKB	A0A0G2STM6	CO1		GO:0016491	GO_REF:0000038	IEA	UniProtKB-KW:KW-0560	F	Cytochrome c oxidase subunit 1	CO1	protein	taxon:79674	20180714	UniProt
UniProtKB	A0A0G2STM6	CO1		GO:0020037	GO_REF:0000002	IEA	InterPro:IPR000883	F	Cytochrome c oxidase subunit 1	CO1	protein	taxon:79674	20180714	InterPro
UniProtKB	A0A0G2STM6	CO1		GO:0022900	GO_REF:0000108	IEA	GO:0004129	P	Cytochrome c oxidase subunit 1	CO1	protein	taxon:79674	20180714	GOC
UniProtKB	A0A0G2STM6	CO1		GO:0046872	GO_REF:0000038	IEA	UniProtKB-KW:KW-0479	F	Cytochrome c oxidase subunit 1	CO1	protein	taxon:79674	20180714	UniProt
UniProtKB	A0A0G2STM6	CO1		GO:0055114	GO_REF:0000002	IEA	InterPro:IPR000883|InterPro:IPR023616|InterPro:IPR036927	P	Cytochrome c oxidase subunit 1	CO1	protein	taxon:79674	20180714	InterPro
UniProtKB	A0A0G2STM6	CO1		GO:0055114	GO_REF:0000038	IEA	UniProtKB-KW:KW-0249	P	Cytochrome c oxidase subunit 1	CO1	protein	taxon:79674	20180714	UniProt
UniProtKB	A0A0G2STM6	CO1		GO:0055114	GO_REF:0000038	IEA	UniProtKB-KW:KW-0560	P	Cytochrome c oxidase subunit 1	CO1	protein	taxon:79674	20180714	UniProt
UniProtKB	A0A0G2STM6	CO1		GO:0070469	GO_REF:0000038	IEA	UniProtKB-KW:KW-0679	C	Cytochrome c oxidase subunit 1	CO1	protein	taxon:79674	20180714	UniProt
UniProtKB	A0A0G2STM6	CO1		GO:1902600	GO_REF:0000108	IEA	GO:0004129	P	Cytochrome c oxidase subunit 1	CO1	protein	taxon:79674	20180714	GOC
UniProtKB	A0A0G4DDC1	bcl2		GO:0016020	GO_REF:0000038	IEA	UniProtKB-KW:KW-0472	C	B cell lymphoma 2	bcl2	protein	taxon:79674	20180714	UniProt
UniProtKB	A0A0G4DDC1	bcl2		GO:0016021	GO_REF:0000038	IEA	UniProtKB-KW:KW-0812	C	B cell lymphoma 2	bcl2	protein	taxon:79674	20180714	UniProt
UniProtKB	A0A0G4DDC1	bcl2		GO:0042981	GO_REF:0000002	IEA	InterPro:IPR026298|InterPro:IPR036834	P	B cell lymphoma 2	bcl2	protein	taxon:79674	20180714	InterPro
UniProtKB	A0A0H3V8H6	A0A0H3V8H6		GO:0003676	GO_REF:0000002	IEA	InterPro:IPR013087	F	Broad-complex-like protein		protein	taxon:159736	20180714	InterPro
UniProtKB	A0A0H3WED3	EcR-M		GO:0003677	GO_REF:0000002	IEA	InterPro:IPR001723|InterPro:IPR003069	F	Ecdysone receptor	EcR-M	protein	taxon:79674	20180714	InterPro
UniProtKB	A0A0H3WED3	EcR-M		GO:0003677	GO_REF:0000038	IEA	UniProtKB-KW:KW-0238	F	Ecdysone receptor	EcR-M	protein	taxon:79674	20180714	UniProt
UniProtKB	A0A0H3WED3	EcR-M		GO:0003677	GO_REF:0000104	IEA	UniRule:UR000415707	F	Ecdysone receptor	EcR-M	protein	taxon:79674	20180714	UniProt
UniProtKB	A0A0H3WED3	EcR-M		GO:0003700	GO_REF:0000002	IEA	InterPro:IPR001628	F	Ecdysone receptor	EcR-M	protein	taxon:79674	20180714	InterPro
UniProtKB	A0A0H3WED3	EcR-M		GO:0003707	GO_REF:0000002	IEA	InterPro:IPR001723	F	Ecdysone receptor	EcR-M	protein	taxon:79674	20180714	InterPro
UniProtKB	A0A0H3WED3	EcR-M		GO:0004884	GO_REF:0000002	IEA	InterPro:IPR003069	F	Ecdysone receptor	EcR-M	protein	taxon:79674	20180714	InterPro
UniProtKB	A0A0H3WED3	EcR-M		GO:0005634	GO_REF:0000002	IEA	InterPro:IPR001628|InterPro:IPR001723|InterPro:IPR003069	C	Ecdysone receptor	EcR-M	protein	taxon:79674	20180714	InterPro
UniProtKB	A0A0H3WED3	EcR-M		GO:0005634	GO_REF:0000038	IEA	UniProtKB-KW:KW-0539	C	Ecdysone receptor	EcR-M	protein	taxon:79674	20180714	UniProt
UniProtKB	A0A0H3WED3	EcR-M		GO:0005634	GO_REF:0000040	IEA	UniProtKB-SubCell:SL-0191	C	Ecdysone receptor	EcR-M	protein	taxon:79674	20180714	UniProt
UniProtKB	A0A0H3WED3	EcR-M		GO:0005634	GO_REF:0000104	IEA	UniRule:UR000415707	C	Ecdysone receptor	EcR-M	protein	taxon:79674	20180714	UniProt
UniProtKB	A0A0H3WED3	EcR-M		GO:0006351	GO_REF:0000038	IEA	UniProtKB-KW:KW-0804	P	Ecdysone receptor	EcR-M	protein	taxon:79674	20180714	UniProt
UniProtKB	A0A0H3WED3	EcR-M		GO:0006351	GO_REF:0000104	IEA	UniRule:UR000415707	P	Ecdysone receptor	EcR-M	protein	taxon:79674	20180714	UniProt
UniProtKB	A0A0H3WED3	EcR-M		GO:0006355	GO_REF:0000002	IEA	InterPro:IPR001628|InterPro:IPR001723|InterPro:IPR003069|InterPro:IPR013088	P	Ecdysone receptor	EcR-M	protein	taxon:79674	20180714	InterPro
UniProtKB	A0A0H3WED3	EcR-M		GO:0006355	GO_REF:0000038	IEA	UniProtKB-KW:KW-0805	P	Ecdysone receptor	EcR-M	protein	taxon:79674	20180714	UniProt
UniProtKB	A0A0H3WED3	EcR-M		GO:0006355	GO_REF:0000104	IEA	UniRule:UR000415707	P	Ecdysone receptor	EcR-M	protein	taxon:79674	20180714	UniProt
UniProtKB	A0A0H3WED3	EcR-M		GO:0008270	GO_REF:0000002	IEA	InterPro:IPR001628|InterPro:IPR013088	F	Ecdysone receptor	EcR-M	protein	taxon:79674	20180714	InterPro
UniProtKB	A0A0H3WED3	EcR-M		GO:0035076	GO_REF:0000002	IEA	InterPro:IPR003069	P	Ecdysone receptor	EcR-M	protein	taxon:79674	20180714	InterPro
UniProtKB	A0A0H3WED3	EcR-M		GO:0035100	GO_REF:0000002	IEA	InterPro:IPR003069	F	Ecdysone receptor	EcR-M	protein	taxon:79674	20180714	InterPro
UniProtKB	A0A0H3WED3	EcR-M		GO:0043565	GO_REF:0000002	IEA	InterPro:IPR001628	F	Ecdysone receptor	EcR-M	protein	taxon:79674	20180714	InterPro
UniProtKB	A0A0H3WED3	EcR-M		GO:0046872	GO_REF:0000038	IEA	UniProtKB-KW:KW-0479	F	Ecdysone receptor	EcR-M	protein	taxon:79674	20180714	UniProt
UniProtKB	A0A0H3WET4	AMY		GO:0003824	GO_REF:0000002	IEA	InterPro:IPR006046|InterPro:IPR006047	F	Alpha-amylase	AMY	protein	taxon:79674	20180714	InterPro
UniProtKB	A0A0H3WET4	AMY		GO:0004556	GO_REF:0000003	IEA	EC:3.2.1.1	F	Alpha-amylase	AMY	protein	taxon:79674	20180714	UniProt
UniProtKB	A0A0H3WET4	AMY		GO:0004556	GO_REF:0000104	IEA	UniRule:UR000094100	F	Alpha-amylase	AMY	protein	taxon:79674	20180714	UniProt
UniProtKB	A0A0H3WET4	AMY		GO:0005975	GO_REF:0000002	IEA	InterPro:IPR006046|InterPro:IPR006047	P	Alpha-amylase	AMY	protein	taxon:79674	20180714	InterPro
UniProtKB	A0A0H3WET4	AMY		GO:0005975	GO_REF:0000038	IEA	UniProtKB-KW:KW-0119	P	Alpha-amylase	AMY	protein	taxon:79674	20180714	UniProt
UniProtKB	A0A0H3WET4	AMY		GO:0008152	GO_REF:0000038	IEA	UniProtKB-KW:KW-0326	P	Alpha-amylase	AMY	protein	taxon:79674	20180714	UniProt
UniProtKB	A0A0H3WET4	AMY		GO:0016787	GO_REF:0000038	IEA	UniProtKB-KW:KW-0378	F	Alpha-amylase	AMY	protein	taxon:79674	20180714	UniProt
UniProtKB	A0A0H3WET4	AMY		GO:0016798	GO_REF:0000038	IEA	UniProtKB-KW:KW-0326	F	Alpha-amylase	AMY	protein	taxon:79674	20180714	UniProt
UniProtKB	A0A0H3WET4	AMY		GO:0043169	GO_REF:0000002	IEA	InterPro:IPR006046	F	Alpha-amylase	AMY	protein	taxon:79674	20180714	InterPro
UniProtKB	A0A0H3WET4	AMY		GO:0103025	GO_REF:0000003	IEA	EC:3.2.1.1	F	Alpha-amylase	AMY	protein	taxon:79674	20180714	UniProt
UniProtKB	A0A0H3WET9	EcR-S2		GO:0003677	GO_REF:0000002	IEA	InterPro:IPR001723|InterPro:IPR003069	F	Ecdysone receptor	EcR-S2	protein	taxon:79674	20180714	InterPro
UniProtKB	A0A0H3WET9	EcR-S2		GO:0003677	GO_REF:0000038	IEA	UniProtKB-KW:KW-0238	F	Ecdysone receptor	EcR-S2	protein	taxon:79674	20180714	UniProt
UniProtKB	A0A0H3WET9	EcR-S2		GO:0003677	GO_REF:0000104	IEA	UniRule:UR000415707	F	Ecdysone receptor	EcR-S2	protein	taxon:79674	20180714	UniProt
UniProtKB	A0A0H3WET9	EcR-S2		GO:0003700	GO_REF:0000002	IEA	InterPro:IPR001628	F	Ecdysone receptor	EcR-S2	protein	taxon:79674	20180714	InterPro
UniProtKB	A0A0H3WET9	EcR-S2		GO:0003707	GO_REF:0000002	IEA	InterPro:IPR001723	F	Ecdysone receptor	EcR-S2	protein	taxon:79674	20180714	InterPro
UniProtKB	A0A0H3WET9	EcR-S2		GO:0004884	GO_REF:0000002	IEA	InterPro:IPR003069	F	Ecdysone receptor	EcR-S2	protein	taxon:79674	20180714	InterPro
UniProtKB	A0A0H3WET9	EcR-S2		GO:0005634	GO_REF:0000002	IEA	InterPro:IPR001628|InterPro:IPR001723|InterPro:IPR003069	C	Ecdysone receptor	EcR-S2	protein	taxon:79674	20180714	InterPro
UniProtKB	A0A0H3WET9	EcR-S2		GO:0005634	GO_REF:0000038	IEA	UniProtKB-KW:KW-0539	C	Ecdysone receptor	EcR-S2	protein	taxon:79674	20180714	UniProt
UniProtKB	A0A0H3WET9	EcR-S2		GO:0005634	GO_REF:0000040	IEA	UniProtKB-SubCell:SL-0191	C	Ecdysone receptor	EcR-S2	protein	taxon:79674	20180714	UniProt
UniProtKB	A0A0H3WET9	EcR-S2		GO:0005634	GO_REF:0000104	IEA	UniRule:UR000415707	C	Ecdysone receptor	EcR-S2	protein	taxon:79674	20180714	UniProt
UniProtKB	A0A0H3WET9	EcR-S2		GO:0006351	GO_REF:0000038	IEA	UniProtKB-KW:KW-0804	P	Ecdysone receptor	EcR-S2	protein	taxon:79674	20180714	UniProt
UniProtKB	A0A0H3WET9	EcR-S2		GO:0006351	GO_REF:0000104	IEA	UniRule:UR000415707	P	Ecdysone receptor	EcR-S2	protein	taxon:79674	20180714	UniProt
UniProtKB	A0A0H3WET9	EcR-S2		GO:0006355	GO_REF:0000002	IEA	InterPro:IPR001628|InterPro:IPR001723|InterPro:IPR003069|InterPro:IPR013088	P	Ecdysone receptor	EcR-S2	protein	taxon:79674	20180714	InterPro
UniProtKB	A0A0H3WET9	EcR-S2		GO:0006355	GO_REF:0000038	IEA	UniProtKB-KW:KW-0805	P	Ecdysone receptor	EcR-S2	protein	taxon:79674	20180714	UniProt
UniProtKB	A0A0H3WET9	EcR-S2		GO:0006355	GO_REF:0000104	IEA	UniRule:UR000415707	P	Ecdysone receptor	EcR-S2	protein	taxon:79674	20180714	UniProt
UniProtKB	A0A0H3WET9	EcR-S2		GO:0008270	GO_REF:0000002	IEA	InterPro:IPR001628|InterPro:IPR013088	F	Ecdysone receptor	EcR-S2	protein	taxon:79674	20180714	InterPro
UniProtKB	A0A0H3WET9	EcR-S2		GO:0035076	GO_REF:0000002	IEA	InterPro:IPR003069	P	Ecdysone receptor	EcR-S2	protein	taxon:79674	20180714	InterPro
UniProtKB	A0A0H3WET9	EcR-S2		GO:0035100	GO_REF:0000002	IEA	InterPro:IPR003069	F	Ecdysone receptor	EcR-S2	protein	taxon:79674	20180714	InterPro
UniProtKB	A0A0H3WET9	EcR-S2		GO:0043565	GO_REF:0000002	IEA	InterPro:IPR001628	F	Ecdysone receptor	EcR-S2	protein	taxon:79674	20180714	InterPro
UniProtKB	A0A0H3WET9	EcR-S2		GO:0046872	GO_REF:0000038	IEA	UniProtKB-KW:KW-0479	F	Ecdysone receptor	EcR-S2	protein	taxon:79674	20180714	UniProt
UniProtKB	A0A0H3WJ85	LTL1		GO:0016020	GO_REF:0000002	IEA	InterPro:IPR005052	C	L-type lectin	LTL1	protein	taxon:159736	20180714	InterPro
UniProtKB	A0A0H3WJ85	LTL1		GO:0016020	GO_REF:0000038	IEA	UniProtKB-KW:KW-0472	C	L-type lectin	LTL1	protein	taxon:159736	20180714	UniProt
UniProtKB	A0A0H3WJ85	LTL1		GO:0016021	GO_REF:0000038	IEA	UniProtKB-KW:KW-0812	C	L-type lectin	LTL1	protein	taxon:159736	20180714	UniProt
UniProtKB	A0A0H3WJ85	LTL1		GO:0030246	GO_REF:0000038	IEA	UniProtKB-KW:KW-0430	F	L-type lectin	LTL1	protein	taxon:159736	20180714	UniProt
UniProtKB	A0A0H3WMJ8	MTL1		GO:0003824	GO_REF:0000002	IEA	InterPro:IPR012341	F	alpha-1,2-Mannosidase	MTL1	protein	taxon:159736	20180714	InterPro
UniProtKB	A0A0H3WMJ8	MTL1		GO:0004571	GO_REF:0000002	IEA	InterPro:IPR001382|InterPro:IPR036026	F	alpha-1,2-Mannosidase	MTL1	protein	taxon:159736	20180714	InterPro
UniProtKB	A0A0H3WMJ8	MTL1		GO:0005509	GO_REF:0000002	IEA	InterPro:IPR001382|InterPro:IPR036026	F	alpha-1,2-Mannosidase	MTL1	protein	taxon:159736	20180714	InterPro
UniProtKB	A0A0H3WMJ8	MTL1		GO:0008152	GO_REF:0000038	IEA	UniProtKB-KW:KW-0326	P	alpha-1,2-Mannosidase	MTL1	protein	taxon:159736	20180714	UniProt
UniProtKB	A0A0H3WMJ8	MTL1		GO:0016020	GO_REF:0000002	IEA	InterPro:IPR001382|InterPro:IPR036026	C	alpha-1,2-Mannosidase	MTL1	protein	taxon:159736	20180714	InterPro
UniProtKB	A0A0H3WMJ8	MTL1		GO:0016020	GO_REF:0000038	IEA	UniProtKB-KW:KW-0472	C	alpha-1,2-Mannosidase	MTL1	protein	taxon:159736	20180714	UniProt
UniProtKB	A0A0H3WMJ8	MTL1		GO:0016021	GO_REF:0000038	IEA	UniProtKB-KW:KW-0812	C	alpha-1,2-Mannosidase	MTL1	protein	taxon:159736	20180714	UniProt
UniProtKB	A0A0H3WMJ8	MTL1		GO:0016787	GO_REF:0000038	IEA	UniProtKB-KW:KW-0378	F	alpha-1,2-Mannosidase	MTL1	protein	taxon:159736	20180714	UniProt
UniProtKB	A0A0H3WMJ8	MTL1		GO:0016798	GO_REF:0000038	IEA	UniProtKB-KW:KW-0326	F	alpha-1,2-Mannosidase	MTL1	protein	taxon:159736	20180714	UniProt
UniProtKB	A0A0H3WMJ8	MTL1		GO:0030246	GO_REF:0000038	IEA	UniProtKB-KW:KW-0430	F	alpha-1,2-Mannosidase	MTL1	protein	taxon:159736	20180714	UniProt
UniProtKB	A0A0H4D2W9	A0A0H4D2W9		GO:0016020	GO_REF:0000038	IEA	UniProtKB-KW:KW-0472	C	Chitin synthase		protein	taxon:159736	20180714	UniProt
UniProtKB	A0A0H4D2W9	A0A0H4D2W9		GO:0016021	GO_REF:0000038	IEA	UniProtKB-KW:KW-0812	C	Chitin synthase		protein	taxon:159736	20180714	UniProt
UniProtKB	A0A0H4D2W9	A0A0H4D2W9		GO:0016758	GO_REF:0000002	IEA	InterPro:IPR004835	F	Chitin synthase		protein	taxon:159736	20180714	InterPro
UniProtKB	A0A0U3B9I8	COI		GO:0004129	GO_REF:0000002	IEA	InterPro:IPR000883|InterPro:IPR023616	F	Cytochrome c oxidase subunit 1	COI	protein	taxon:159736	20180714	InterPro
UniProtKB	A0A0U3B9I8	COI		GO:0004129	GO_REF:0000003	IEA	EC:1.9.3.1	F	Cytochrome c oxidase subunit 1	COI	protein	taxon:159736	20180714	UniProt
UniProtKB	A0A0U3B9I8	COI		GO:0005739	GO_REF:0000038	IEA	UniProtKB-KW:KW-0496	C	Cytochrome c oxidase subunit 1	COI	protein	taxon:159736	20180714	UniProt
UniProtKB	A0A0U3B9I8	COI		GO:0005743	GO_REF:0000038	IEA	UniProtKB-KW:KW-0999	C	Cytochrome c oxidase subunit 1	COI	protein	taxon:159736	20180714	UniProt
UniProtKB	A0A0U3B9I8	COI		GO:0005743	GO_REF:0000040	IEA	UniProtKB-SubCell:SL-0168	C	Cytochrome c oxidase subunit 1	COI	protein	taxon:159736	20180714	UniProt
UniProtKB	A0A0U3B9I8	COI		GO:0006119	GO_REF:0000041	IEA	UniPathway:UPA00705	P	Cytochrome c oxidase subunit 1	COI	protein	taxon:159736	20180714	UniProt
UniProtKB	A0A0U3B9I8	COI		GO:0009060	GO_REF:0000002	IEA	InterPro:IPR000883	P	Cytochrome c oxidase subunit 1	COI	protein	taxon:159736	20180714	InterPro
UniProtKB	A0A0U3B9I8	COI		GO:0016020	GO_REF:0000038	IEA	UniProtKB-KW:KW-0472	C	Cytochrome c oxidase subunit 1	COI	protein	taxon:159736	20180714	UniProt
UniProtKB	A0A0U3B9I8	COI		GO:0016021	GO_REF:0000002	IEA	InterPro:IPR000883	C	Cytochrome c oxidase subunit 1	COI	protein	taxon:159736	20180714	InterPro
UniProtKB	A0A0U3B9I8	COI		GO:0016021	GO_REF:0000038	IEA	UniProtKB-KW:KW-0812	C	Cytochrome c oxidase subunit 1	COI	protein	taxon:159736	20180714	UniProt
UniProtKB	A0A0U3B9I8	COI		GO:0016491	GO_REF:0000038	IEA	UniProtKB-KW:KW-0560	F	Cytochrome c oxidase subunit 1	COI	protein	taxon:159736	20180714	UniProt
UniProtKB	A0A0U3B9I8	COI		GO:0020037	GO_REF:0000002	IEA	InterPro:IPR000883	F	Cytochrome c oxidase subunit 1	COI	protein	taxon:159736	20180714	InterPro
UniProtKB	A0A0U3B9I8	COI		GO:0022900	GO_REF:0000108	IEA	GO:0004129	P	Cytochrome c oxidase subunit 1	COI	protein	taxon:159736	20180714	GOC
UniProtKB	A0A0U3B9I8	COI		GO:0046872	GO_REF:0000038	IEA	UniProtKB-KW:KW-0479	F	Cytochrome c oxidase subunit 1	COI	protein	taxon:159736	20180714	UniProt
UniProtKB	A0A0U3B9I8	COI		GO:0055114	GO_REF:0000002	IEA	InterPro:IPR000883|InterPro:IPR023616|InterPro:IPR036927	P	Cytochrome c oxidase subunit 1	COI	protein	taxon:159736	20180714	InterPro
UniProtKB	A0A0U3B9I8	COI		GO:0055114	GO_REF:0000038	IEA	UniProtKB-KW:KW-0249	P	Cytochrome c oxidase subunit 1	COI	protein	taxon:159736	20180714	UniProt
UniProtKB	A0A0U3B9I8	COI		GO:0055114	GO_REF:0000038	IEA	UniProtKB-KW:KW-0560	P	Cytochrome c oxidase subunit 1	COI	protein	taxon:159736	20180714	UniProt
UniProtKB	A0A0U3B9I8	COI		GO:0070469	GO_REF:0000038	IEA	UniProtKB-KW:KW-0679	C	Cytochrome c oxidase subunit 1	COI	protein	taxon:159736	20180714	UniProt
UniProtKB	A0A0U3B9I8	COI		GO:1902600	GO_REF:0000108	IEA	GO:0004129	P	Cytochrome c oxidase subunit 1	COI	protein	taxon:159736	20180714	GOC
UniProtKB	A0A0U3J9C9	COI		GO:0004129	GO_REF:0000002	IEA	InterPro:IPR000883|InterPro:IPR023616	F	Cytochrome c oxidase subunit 1	COI	protein	taxon:159736	20180714	InterPro
UniProtKB	A0A0U3J9C9	COI		GO:0004129	GO_REF:0000003	IEA	EC:1.9.3.1	F	Cytochrome c oxidase subunit 1	COI	protein	taxon:159736	20180714	UniProt
UniProtKB	A0A0U3J9C9	COI		GO:0005739	GO_REF:0000038	IEA	UniProtKB-KW:KW-0496	C	Cytochrome c oxidase subunit 1	COI	protein	taxon:159736	20180714	UniProt
UniProtKB	A0A0U3J9C9	COI		GO:0005743	GO_REF:0000038	IEA	UniProtKB-KW:KW-0999	C	Cytochrome c oxidase subunit 1	COI	protein	taxon:159736	20180714	UniProt
UniProtKB	A0A0U3J9C9	COI		GO:0005743	GO_REF:0000040	IEA	UniProtKB-SubCell:SL-0168	C	Cytochrome c oxidase subunit 1	COI	protein	taxon:159736	20180714	UniProt
UniProtKB	A0A0U3J9C9	COI		GO:0006119	GO_REF:0000041	IEA	UniPathway:UPA00705	P	Cytochrome c oxidase subunit 1	COI	protein	taxon:159736	20180714	UniProt
UniProtKB	A0A0U3J9C9	COI		GO:0009060	GO_REF:0000002	IEA	InterPro:IPR000883	P	Cytochrome c oxidase subunit 1	COI	protein	taxon:159736	20180714	InterPro
UniProtKB	A0A0U3J9C9	COI		GO:0016020	GO_REF:0000038	IEA	UniProtKB-KW:KW-0472	C	Cytochrome c oxidase subunit 1	COI	protein	taxon:159736	20180714	UniProt
UniProtKB	A0A0U3J9C9	COI		GO:0016021	GO_REF:0000002	IEA	InterPro:IPR000883	C	Cytochrome c oxidase subunit 1	COI	protein	taxon:159736	20180714	InterPro
UniProtKB	A0A0U3J9C9	COI		GO:0016021	GO_REF:0000038	IEA	UniProtKB-KW:KW-0812	C	Cytochrome c oxidase subunit 1	COI	protein	taxon:159736	20180714	UniProt
UniProtKB	A0A0U3J9C9	COI		GO:0016491	GO_REF:0000038	IEA	UniProtKB-KW:KW-0560	F	Cytochrome c oxidase subunit 1	COI	protein	taxon:159736	20180714	UniProt
UniProtKB	A0A0U3J9C9	COI		GO:0020037	GO_REF:0000002	IEA	InterPro:IPR000883	F	Cytochrome c oxidase subunit 1	COI	protein	taxon:159736	20180714	InterPro
UniProtKB	A0A0U3J9C9	COI		GO:0022900	GO_REF:0000108	IEA	GO:0004129	P	Cytochrome c oxidase subunit 1	COI	protein	taxon:159736	20180714	GOC
UniProtKB	A0A0U3J9C9	COI		GO:0046872	GO_REF:0000038	IEA	UniProtKB-KW:KW-0479	F	Cytochrome c oxidase subunit 1	COI	protein	taxon:159736	20180714	UniProt
UniProtKB	A0A0U3J9C9	COI		GO:0055114	GO_REF:0000002	IEA	InterPro:IPR000883|InterPro:IPR023616|InterPro:IPR036927	P	Cytochrome c oxidase subunit 1	COI	protein	taxon:159736	20180714	InterPro
UniProtKB	A0A0U3J9C9	COI		GO:0055114	GO_REF:0000038	IEA	UniProtKB-KW:KW-0249	P	Cytochrome c oxidase subunit 1	COI	protein	taxon:159736	20180714	UniProt
UniProtKB	A0A0U3J9C9	COI		GO:0055114	GO_REF:0000038	IEA	UniProtKB-KW:KW-0560	P	Cytochrome c oxidase subunit 1	COI	protein	taxon:159736	20180714	UniProt
UniProtKB	A0A0U3J9C9	COI		GO:0070469	GO_REF:0000038	IEA	UniProtKB-KW:KW-0679	C	Cytochrome c oxidase subunit 1	COI	protein	taxon:159736	20180714	UniProt
UniProtKB	A0A0U3J9C9	COI		GO:1902600	GO_REF:0000108	IEA	GO:0004129	P	Cytochrome c oxidase subunit 1	COI	protein	taxon:159736	20180714	GOC
UniProtKB	A0A0U3J9P3	COI		GO:0004129	GO_REF:0000002	IEA	InterPro:IPR000883|InterPro:IPR023616	F	Cytochrome c oxidase subunit 1	COI	protein	taxon:159736	20180714	InterPro
UniProtKB	A0A0U3J9P3	COI		GO:0004129	GO_REF:0000003	IEA	EC:1.9.3.1	F	Cytochrome c oxidase subunit 1	COI	protein	taxon:159736	20180714	UniProt
UniProtKB	A0A0U3J9P3	COI		GO:0005739	GO_REF:0000038	IEA	UniProtKB-KW:KW-0496	C	Cytochrome c oxidase subunit 1	COI	protein	taxon:159736	20180714	UniProt
UniProtKB	A0A0U3J9P3	COI		GO:0005743	GO_REF:0000038	IEA	UniProtKB-KW:KW-0999	C	Cytochrome c oxidase subunit 1	COI	protein	taxon:159736	20180714	UniProt
UniProtKB	A0A0U3J9P3	COI		GO:0005743	GO_REF:0000040	IEA	UniProtKB-SubCell:SL-0168	C	Cytochrome c oxidase subunit 1	COI	protein	taxon:159736	20180714	UniProt
UniProtKB	A0A0U3J9P3	COI		GO:0006119	GO_REF:0000041	IEA	UniPathway:UPA00705	P	Cytochrome c oxidase subunit 1	COI	protein	taxon:159736	20180714	UniProt
UniProtKB	A0A0U3J9P3	COI		GO:0009060	GO_REF:0000002	IEA	InterPro:IPR000883	P	Cytochrome c oxidase subunit 1	COI	protein	taxon:159736	20180714	InterPro
UniProtKB	A0A0U3J9P3	COI		GO:0016020	GO_REF:0000038	IEA	UniProtKB-KW:KW-0472	C	Cytochrome c oxidase subunit 1	COI	protein	taxon:159736	20180714	UniProt
UniProtKB	A0A0U3J9P3	COI		GO:0016021	GO_REF:0000002	IEA	InterPro:IPR000883	C	Cytochrome c oxidase subunit 1	COI	protein	taxon:159736	20180714	InterPro
UniProtKB	A0A0U3J9P3	COI		GO:0016021	GO_REF:0000038	IEA	UniProtKB-KW:KW-0812	C	Cytochrome c oxidase subunit 1	COI	protein	taxon:159736	20180714	UniProt
UniProtKB	A0A0U3J9P3	COI		GO:0016491	GO_REF:0000038	IEA	UniProtKB-KW:KW-0560	F	Cytochrome c oxidase subunit 1	COI	protein	taxon:159736	20180714	UniProt
UniProtKB	A0A0U3J9P3	COI		GO:0020037	GO_REF:0000002	IEA	InterPro:IPR000883	F	Cytochrome c oxidase subunit 1	COI	protein	taxon:159736	20180714	InterPro
UniProtKB	A0A0U3J9P3	COI		GO:0022900	GO_REF:0000108	IEA	GO:0004129	P	Cytochrome c oxidase subunit 1	COI	protein	taxon:159736	20180714	GOC
UniProtKB	A0A0U3J9P3	COI		GO:0046872	GO_REF:0000038	IEA	UniProtKB-KW:KW-0479	F	Cytochrome c oxidase subunit 1	COI	protein	taxon:159736	20180714	UniProt
UniProtKB	A0A0U3J9P3	COI		GO:0055114	GO_REF:0000002	IEA	InterPro:IPR000883|InterPro:IPR023616|InterPro:IPR036927	P	Cytochrome c oxidase subunit 1	COI	protein	taxon:159736	20180714	InterPro
UniProtKB	A0A0U3J9P3	COI		GO:0055114	GO_REF:0000038	IEA	UniProtKB-KW:KW-0249	P	Cytochrome c oxidase subunit 1	COI	protein	taxon:159736	20180714	UniProt
UniProtKB	A0A0U3J9P3	COI		GO:0055114	GO_REF:0000038	IEA	UniProtKB-KW:KW-0560	P	Cytochrome c oxidase subunit 1	COI	protein	taxon:159736	20180714	UniProt
UniProtKB	A0A0U3J9P3	COI		GO:0070469	GO_REF:0000038	IEA	UniProtKB-KW:KW-0679	C	Cytochrome c oxidase subunit 1	COI	protein	taxon:159736	20180714	UniProt
UniProtKB	A0A0U3J9P3	COI		GO:1902600	GO_REF:0000108	IEA	GO:0004129	P	Cytochrome c oxidase subunit 1	COI	protein	taxon:159736	20180714	GOC
UniProtKB	A0A0U3KAS8	COI		GO:0004129	GO_REF:0000002	IEA	InterPro:IPR000883|InterPro:IPR023616	F	Cytochrome c oxidase subunit 1	COI	protein	taxon:159736	20180714	InterPro
UniProtKB	A0A0U3KAS8	COI		GO:0004129	GO_REF:0000003	IEA	EC:1.9.3.1	F	Cytochrome c oxidase subunit 1	COI	protein	taxon:159736	20180714	UniProt
UniProtKB	A0A0U3KAS8	COI		GO:0005739	GO_REF:0000038	IEA	UniProtKB-KW:KW-0496	C	Cytochrome c oxidase subunit 1	COI	protein	taxon:159736	20180714	UniProt
UniProtKB	A0A0U3KAS8	COI		GO:0005743	GO_REF:0000038	IEA	UniProtKB-KW:KW-0999	C	Cytochrome c oxidase subunit 1	COI	protein	taxon:159736	20180714	UniProt
UniProtKB	A0A0U3KAS8	COI		GO:0005743	GO_REF:0000040	IEA	UniProtKB-SubCell:SL-0168	C	Cytochrome c oxidase subunit 1	COI	protein	taxon:159736	20180714	UniProt
UniProtKB	A0A0U3KAS8	COI		GO:0006119	GO_REF:0000041	IEA	UniPathway:UPA00705	P	Cytochrome c oxidase subunit 1	COI	protein	taxon:159736	20180714	UniProt
UniProtKB	A0A0U3KAS8	COI		GO:0009060	GO_REF:0000002	IEA	InterPro:IPR000883	P	Cytochrome c oxidase subunit 1	COI	protein	taxon:159736	20180714	InterPro
UniProtKB	A0A0U3KAS8	COI		GO:0016020	GO_REF:0000038	IEA	UniProtKB-KW:KW-0472	C	Cytochrome c oxidase subunit 1	COI	protein	taxon:159736	20180714	UniProt
UniProtKB	A0A0U3KAS8	COI		GO:0016021	GO_REF:0000002	IEA	InterPro:IPR000883	C	Cytochrome c oxidase subunit 1	COI	protein	taxon:159736	20180714	InterPro
UniProtKB	A0A0U3KAS8	COI		GO:0016021	GO_REF:0000038	IEA	UniProtKB-KW:KW-0812	C	Cytochrome c oxidase subunit 1	COI	protein	taxon:159736	20180714	UniProt
UniProtKB	A0A0U3KAS8	COI		GO:0016491	GO_REF:0000038	IEA	UniProtKB-KW:KW-0560	F	Cytochrome c oxidase subunit 1	COI	protein	taxon:159736	20180714	UniProt
UniProtKB	A0A0U3KAS8	COI		GO:0020037	GO_REF:0000002	IEA	InterPro:IPR000883	F	Cytochrome c oxidase subunit 1	COI	protein	taxon:159736	20180714	InterPro
UniProtKB	A0A0U3KAS8	COI		GO:0022900	GO_REF:0000108	IEA	GO:0004129	P	Cytochrome c oxidase subunit 1	COI	protein	taxon:159736	20180714	GOC
UniProtKB	A0A0U3KAS8	COI		GO:0046872	GO_REF:0000038	IEA	UniProtKB-KW:KW-0479	F	Cytochrome c oxidase subunit 1	COI	protein	taxon:159736	20180714	UniProt
UniProtKB	A0A0U3KAS8	COI		GO:0055114	GO_REF:0000002	IEA	InterPro:IPR000883|InterPro:IPR023616|InterPro:IPR036927	P	Cytochrome c oxidase subunit 1	COI	protein	taxon:159736	20180714	InterPro
UniProtKB	A0A0U3KAS8	COI		GO:0055114	GO_REF:0000038	IEA	UniProtKB-KW:KW-0249	P	Cytochrome c oxidase subunit 1	COI	protein	taxon:159736	20180714	UniProt
UniProtKB	A0A0U3KAS8	COI		GO:0055114	GO_REF:0000038	IEA	UniProtKB-KW:KW-0560	P	Cytochrome c oxidase subunit 1	COI	protein	taxon:159736	20180714	UniProt
UniProtKB	A0A0U3KAS8	COI		GO:0070469	GO_REF:0000038	IEA	UniProtKB-KW:KW-0679	C	Cytochrome c oxidase subunit 1	COI	protein	taxon:159736	20180714	UniProt
UniProtKB	A0A0U3KAS8	COI		GO:1902600	GO_REF:0000108	IEA	GO:0004129	P	Cytochrome c oxidase subunit 1	COI	protein	taxon:159736	20180714	GOC
UniProtKB	B2KNR4	COI		GO:0004129	GO_REF:0000002	IEA	InterPro:IPR000883|InterPro:IPR023616	F	Cytochrome c oxidase subunit 1	COI	protein	taxon:159738	20180714	InterPro
UniProtKB	B2KNR4	COI		GO:0004129	GO_REF:0000003	IEA	EC:1.9.3.1	F	Cytochrome c oxidase subunit 1	COI	protein	taxon:159738	20180714	UniProt
UniProtKB	B2KNR4	COI		GO:0005739	GO_REF:0000038	IEA	UniProtKB-KW:KW-0496	C	Cytochrome c oxidase subunit 1	COI	protein	taxon:159738	20180714	UniProt
UniProtKB	B2KNR4	COI		GO:0005743	GO_REF:0000038	IEA	UniProtKB-KW:KW-0999	C	Cytochrome c oxidase subunit 1	COI	protein	taxon:159738	20180714	UniProt
UniProtKB	B2KNR4	COI		GO:0005743	GO_REF:0000040	IEA	UniProtKB-SubCell:SL-0168	C	Cytochrome c oxidase subunit 1	COI	protein	taxon:159738	20180714	UniProt
UniProtKB	B2KNR4	COI		GO:0006119	GO_REF:0000041	IEA	UniPathway:UPA00705	P	Cytochrome c oxidase subunit 1	COI	protein	taxon:159738	20180714	UniProt
UniProtKB	B2KNR4	COI		GO:0009060	GO_REF:0000002	IEA	InterPro:IPR000883	P	Cytochrome c oxidase subunit 1	COI	protein	taxon:159738	20180714	InterPro
UniProtKB	B2KNR4	COI		GO:0016020	GO_REF:0000038	IEA	UniProtKB-KW:KW-0472	C	Cytochrome c oxidase subunit 1	COI	protein	taxon:159738	20180714	UniProt
UniProtKB	B2KNR4	COI		GO:0016021	GO_REF:0000002	IEA	InterPro:IPR000883	C	Cytochrome c oxidase subunit 1	COI	protein	taxon:159738	20180714	InterPro
UniProtKB	B2KNR4	COI		GO:0016021	GO_REF:0000038	IEA	UniProtKB-KW:KW-0812	C	Cytochrome c oxidase subunit 1	COI	protein	taxon:159738	20180714	UniProt
UniProtKB	B2KNR4	COI		GO:0016491	GO_REF:0000038	IEA	UniProtKB-KW:KW-0560	F	Cytochrome c oxidase subunit 1	COI	protein	taxon:159738	20180714	UniProt
UniProtKB	B2KNR4	COI		GO:0020037	GO_REF:0000002	IEA	InterPro:IPR000883	F	Cytochrome c oxidase subunit 1	COI	protein	taxon:159738	20180714	InterPro
UniProtKB	B2KNR4	COI		GO:0022900	GO_REF:0000108	IEA	GO:0004129	P	Cytochrome c oxidase subunit 1	COI	protein	taxon:159738	20180714	GOC
UniProtKB	B2KNR4	COI		GO:0046872	GO_REF:0000038	IEA	UniProtKB-KW:KW-0479	F	Cytochrome c oxidase subunit 1	COI	protein	taxon:159738	20180714	UniProt
UniProtKB	B2KNR4	COI		GO:0055114	GO_REF:0000002	IEA	InterPro:IPR000883|InterPro:IPR023616|InterPro:IPR036927	P	Cytochrome c oxidase subunit 1	COI	protein	taxon:159738	20180714	InterPro
UniProtKB	B2KNR4	COI		GO:0055114	GO_REF:0000038	IEA	UniProtKB-KW:KW-0249	P	Cytochrome c oxidase subunit 1	COI	protein	taxon:159738	20180714	UniProt
UniProtKB	B2KNR4	COI		GO:0055114	GO_REF:0000038	IEA	UniProtKB-KW:KW-0560	P	Cytochrome c oxidase subunit 1	COI	protein	taxon:159738	20180714	UniProt
UniProtKB	B2KNR4	COI		GO:0070469	GO_REF:0000038	IEA	UniProtKB-KW:KW-0679	C	Cytochrome c oxidase subunit 1	COI	protein	taxon:159738	20180714	UniProt
UniProtKB	B2KNR4	COI		GO:1902600	GO_REF:0000108	IEA	GO:0004129	P	Cytochrome c oxidase subunit 1	COI	protein	taxon:159738	20180714	GOC
UniProtKB	C5H640	COI		GO:0004129	GO_REF:0000002	IEA	InterPro:IPR000883|InterPro:IPR023616	F	Cytochrome c oxidase subunit 1	COI	protein	taxon:159738	20180714	InterPro
UniProtKB	C5H640	COI		GO:0004129	GO_REF:0000003	IEA	EC:1.9.3.1	F	Cytochrome c oxidase subunit 1	COI	protein	taxon:159738	20180714	UniProt
UniProtKB	C5H640	COI		GO:0005739	GO_REF:0000038	IEA	UniProtKB-KW:KW-0496	C	Cytochrome c oxidase subunit 1	COI	protein	taxon:159738	20180714	UniProt
UniProtKB	C5H640	COI		GO:0005743	GO_REF:0000038	IEA	UniProtKB-KW:KW-0999	C	Cytochrome c oxidase subunit 1	COI	protein	taxon:159738	20180714	UniProt
UniProtKB	C5H640	COI		GO:0005743	GO_REF:0000040	IEA	UniProtKB-SubCell:SL-0168	C	Cytochrome c oxidase subunit 1	COI	protein	taxon:159738	20180714	UniProt
UniProtKB	C5H640	COI		GO:0006119	GO_REF:0000041	IEA	UniPathway:UPA00705	P	Cytochrome c oxidase subunit 1	COI	protein	taxon:159738	20180714	UniProt
UniProtKB	C5H640	COI		GO:0009060	GO_REF:0000002	IEA	InterPro:IPR000883	P	Cytochrome c oxidase subunit 1	COI	protein	taxon:159738	20180714	InterPro
UniProtKB	C5H640	COI		GO:0016020	GO_REF:0000038	IEA	UniProtKB-KW:KW-0472	C	Cytochrome c oxidase subunit 1	COI	protein	taxon:159738	20180714	UniProt
UniProtKB	C5H640	COI		GO:0016021	GO_REF:0000002	IEA	InterPro:IPR000883	C	Cytochrome c oxidase subunit 1	COI	protein	taxon:159738	20180714	InterPro
UniProtKB	C5H640	COI		GO:0016021	GO_REF:0000038	IEA	UniProtKB-KW:KW-0812	C	Cytochrome c oxidase subunit 1	COI	protein	taxon:159738	20180714	UniProt
UniProtKB	C5H640	COI		GO:0016491	GO_REF:0000038	IEA	UniProtKB-KW:KW-0560	F	Cytochrome c oxidase subunit 1	COI	protein	taxon:159738	20180714	UniProt
UniProtKB	C5H640	COI		GO:0020037	GO_REF:0000002	IEA	InterPro:IPR000883	F	Cytochrome c oxidase subunit 1	COI	protein	taxon:159738	20180714	InterPro
UniProtKB	C5H640	COI		GO:0022900	GO_REF:0000108	IEA	GO:0004129	P	Cytochrome c oxidase subunit 1	COI	protein	taxon:159738	20180714	GOC
UniProtKB	C5H640	COI		GO:0046872	GO_REF:0000038	IEA	UniProtKB-KW:KW-0479	F	Cytochrome c oxidase subunit 1	COI	protein	taxon:159738	20180714	UniProt
UniProtKB	C5H640	COI		GO:0055114	GO_REF:0000002	IEA	InterPro:IPR000883|InterPro:IPR023616|InterPro:IPR036927	P	Cytochrome c oxidase subunit 1	COI	protein	taxon:159738	20180714	InterPro
UniProtKB	C5H640	COI		GO:0055114	GO_REF:0000038	IEA	UniProtKB-KW:KW-0249	P	Cytochrome c oxidase subunit 1	COI	protein	taxon:159738	20180714	UniProt
UniProtKB	C5H640	COI		GO:0055114	GO_REF:0000038	IEA	UniProtKB-KW:KW-0560	P	Cytochrome c oxidase subunit 1	COI	protein	taxon:159738	20180714	UniProt
UniProtKB	C5H640	COI		GO:0070469	GO_REF:0000038	IEA	UniProtKB-KW:KW-0679	C	Cytochrome c oxidase subunit 1	COI	protein	taxon:159738	20180714	UniProt
UniProtKB	C5H640	COI		GO:1902600	GO_REF:0000108	IEA	GO:0004129	P	Cytochrome c oxidase subunit 1	COI	protein	taxon:159738	20180714	GOC
UniProtKB	D1MLW5	COI		GO:0004129	GO_REF:0000002	IEA	InterPro:IPR000883|InterPro:IPR023615|InterPro:IPR023616	F	Cytochrome c oxidase subunit 1	COI	protein	taxon:178403	20180714	InterPro
UniProtKB	D1MLW5	COI		GO:0004129	GO_REF:0000003	IEA	EC:1.9.3.1	F	Cytochrome c oxidase subunit 1	COI	protein	taxon:178403	20180714	UniProt
UniProtKB	D1MLW5	COI		GO:0005739	GO_REF:0000038	IEA	UniProtKB-KW:KW-0496	C	Cytochrome c oxidase subunit 1	COI	protein	taxon:178403	20180714	UniProt
UniProtKB	D1MLW5	COI		GO:0005743	GO_REF:0000038	IEA	UniProtKB-KW:KW-0999	C	Cytochrome c oxidase subunit 1	COI	protein	taxon:178403	20180714	UniProt
UniProtKB	D1MLW5	COI		GO:0005743	GO_REF:0000040	IEA	UniProtKB-SubCell:SL-0168	C	Cytochrome c oxidase subunit 1	COI	protein	taxon:178403	20180714	UniProt
UniProtKB	D1MLW5	COI		GO:0006119	GO_REF:0000041	IEA	UniPathway:UPA00705	P	Cytochrome c oxidase subunit 1	COI	protein	taxon:178403	20180714	UniProt
UniProtKB	D1MLW5	COI		GO:0009060	GO_REF:0000002	IEA	InterPro:IPR000883	P	Cytochrome c oxidase subunit 1	COI	protein	taxon:178403	20180714	InterPro
UniProtKB	D1MLW5	COI		GO:0016020	GO_REF:0000038	IEA	UniProtKB-KW:KW-0472	C	Cytochrome c oxidase subunit 1	COI	protein	taxon:178403	20180714	UniProt
UniProtKB	D1MLW5	COI		GO:0016021	GO_REF:0000002	IEA	InterPro:IPR000883	C	Cytochrome c oxidase subunit 1	COI	protein	taxon:178403	20180714	InterPro
UniProtKB	D1MLW5	COI		GO:0016021	GO_REF:0000038	IEA	UniProtKB-KW:KW-0812	C	Cytochrome c oxidase subunit 1	COI	protein	taxon:178403	20180714	UniProt
UniProtKB	D1MLW5	COI		GO:0016491	GO_REF:0000038	IEA	UniProtKB-KW:KW-0560	F	Cytochrome c oxidase subunit 1	COI	protein	taxon:178403	20180714	UniProt
UniProtKB	D1MLW5	COI		GO:0020037	GO_REF:0000002	IEA	InterPro:IPR000883	F	Cytochrome c oxidase subunit 1	COI	protein	taxon:178403	20180714	InterPro
UniProtKB	D1MLW5	COI		GO:0022900	GO_REF:0000108	IEA	GO:0004129	P	Cytochrome c oxidase subunit 1	COI	protein	taxon:178403	20180714	GOC
UniProtKB	D1MLW5	COI		GO:0046872	GO_REF:0000038	IEA	UniProtKB-KW:KW-0479	F	Cytochrome c oxidase subunit 1	COI	protein	taxon:178403	20180714	UniProt
UniProtKB	D1MLW5	COI		GO:0055114	GO_REF:0000002	IEA	InterPro:IPR000883|InterPro:IPR023615|InterPro:IPR023616|InterPro:IPR036927	P	Cytochrome c oxidase subunit 1	COI	protein	taxon:178403	20180714	InterPro
UniProtKB	D1MLW5	COI		GO:0055114	GO_REF:0000038	IEA	UniProtKB-KW:KW-0249	P	Cytochrome c oxidase subunit 1	COI	protein	taxon:178403	20180714	UniProt
UniProtKB	D1MLW5	COI		GO:0055114	GO_REF:0000038	IEA	UniProtKB-KW:KW-0560	P	Cytochrome c oxidase subunit 1	COI	protein	taxon:178403	20180714	UniProt
UniProtKB	D1MLW5	COI		GO:0070469	GO_REF:0000038	IEA	UniProtKB-KW:KW-0679	C	Cytochrome c oxidase subunit 1	COI	protein	taxon:178403	20180714	UniProt
UniProtKB	D1MLW5	COI		GO:1902600	GO_REF:0000108	IEA	GO:0004129	P	Cytochrome c oxidase subunit 1	COI	protein	taxon:178403	20180714	GOC
UniProtKB	E5LCS1	E5LCS1		GO:0004129	GO_REF:0000002	IEA	InterPro:IPR000883|InterPro:IPR023616	F	Cytochrome c oxidase subunit 1		protein	taxon:159738	20180714	InterPro
UniProtKB	E5LCS1	E5LCS1		GO:0004129	GO_REF:0000003	IEA	EC:1.9.3.1	F	Cytochrome c oxidase subunit 1		protein	taxon:159738	20180714	UniProt
UniProtKB	E5LCS1	E5LCS1		GO:0005739	GO_REF:0000038	IEA	UniProtKB-KW:KW-0496	C	Cytochrome c oxidase subunit 1		protein	taxon:159738	20180714	UniProt
UniProtKB	E5LCS1	E5LCS1		GO:0005743	GO_REF:0000038	IEA	UniProtKB-KW:KW-0999	C	Cytochrome c oxidase subunit 1		protein	taxon:159738	20180714	UniProt
UniProtKB	E5LCS1	E5LCS1		GO:0005743	GO_REF:0000040	IEA	UniProtKB-SubCell:SL-0168	C	Cytochrome c oxidase subunit 1		protein	taxon:159738	20180714	UniProt
UniProtKB	E5LCS1	E5LCS1		GO:0006119	GO_REF:0000041	IEA	UniPathway:UPA00705	P	Cytochrome c oxidase subunit 1		protein	taxon:159738	20180714	UniProt
UniProtKB	E5LCS1	E5LCS1		GO:0009060	GO_REF:0000002	IEA	InterPro:IPR000883	P	Cytochrome c oxidase subunit 1		protein	taxon:159738	20180714	InterPro
UniProtKB	E5LCS1	E5LCS1		GO:0016020	GO_REF:0000038	IEA	UniProtKB-KW:KW-0472	C	Cytochrome c oxidase subunit 1		protein	taxon:159738	20180714	UniProt
UniProtKB	E5LCS1	E5LCS1		GO:0016021	GO_REF:0000002	IEA	InterPro:IPR000883	C	Cytochrome c oxidase subunit 1		protein	taxon:159738	20180714	InterPro
UniProtKB	E5LCS1	E5LCS1		GO:0016021	GO_REF:0000038	IEA	UniProtKB-KW:KW-0812	C	Cytochrome c oxidase subunit 1		protein	taxon:159738	20180714	UniProt
UniProtKB	E5LCS1	E5LCS1		GO:0016491	GO_REF:0000038	IEA	UniProtKB-KW:KW-0560	F	Cytochrome c oxidase subunit 1		protein	taxon:159738	20180714	UniProt
UniProtKB	E5LCS1	E5LCS1		GO:0020037	GO_REF:0000002	IEA	InterPro:IPR000883	F	Cytochrome c oxidase subunit 1		protein	taxon:159738	20180714	InterPro
UniProtKB	E5LCS1	E5LCS1		GO:0022900	GO_REF:0000108	IEA	GO:0004129	P	Cytochrome c oxidase subunit 1		protein	taxon:159738	20180714	GOC
UniProtKB	E5LCS1	E5LCS1		GO:0046872	GO_REF:0000038	IEA	UniProtKB-KW:KW-0479	F	Cytochrome c oxidase subunit 1		protein	taxon:159738	20180714	UniProt
UniProtKB	E5LCS1	E5LCS1		GO:0055114	GO_REF:0000002	IEA	InterPro:IPR000883|InterPro:IPR023616|InterPro:IPR036927	P	Cytochrome c oxidase subunit 1		protein	taxon:159738	20180714	InterPro
UniProtKB	E5LCS1	E5LCS1		GO:0055114	GO_REF:0000038	IEA	UniProtKB-KW:KW-0249	P	Cytochrome c oxidase subunit 1		protein	taxon:159738	20180714	UniProt
UniProtKB	E5LCS1	E5LCS1		GO:0055114	GO_REF:0000038	IEA	UniProtKB-KW:KW-0560	P	Cytochrome c oxidase subunit 1		protein	taxon:159738	20180714	UniProt
UniProtKB	E5LCS1	E5LCS1		GO:0070469	GO_REF:0000038	IEA	UniProtKB-KW:KW-0679	C	Cytochrome c oxidase subunit 1		protein	taxon:159738	20180714	UniProt
UniProtKB	E5LCS1	E5LCS1		GO:1902600	GO_REF:0000108	IEA	GO:0004129	P	Cytochrome c oxidase subunit 1		protein	taxon:159738	20180714	GOC
UniProtKB	E5LCV6	E5LCV6		GO:0004129	GO_REF:0000002	IEA	InterPro:IPR000883|InterPro:IPR023616	F	Cytochrome c oxidase subunit 1		protein	taxon:159738	20180714	InterPro
UniProtKB	E5LCV6	E5LCV6		GO:0004129	GO_REF:0000003	IEA	EC:1.9.3.1	F	Cytochrome c oxidase subunit 1		protein	taxon:159738	20180714	UniProt
UniProtKB	E5LCV6	E5LCV6		GO:0005739	GO_REF:0000038	IEA	UniProtKB-KW:KW-0496	C	Cytochrome c oxidase subunit 1		protein	taxon:159738	20180714	UniProt
UniProtKB	E5LCV6	E5LCV6		GO:0005743	GO_REF:0000038	IEA	UniProtKB-KW:KW-0999	C	Cytochrome c oxidase subunit 1		protein	taxon:159738	20180714	UniProt
UniProtKB	E5LCV6	E5LCV6		GO:0005743	GO_REF:0000040	IEA	UniProtKB-SubCell:SL-0168	C	Cytochrome c oxidase subunit 1		protein	taxon:159738	20180714	UniProt
UniProtKB	E5LCV6	E5LCV6		GO:0006119	GO_REF:0000041	IEA	UniPathway:UPA00705	P	Cytochrome c oxidase subunit 1		protein	taxon:159738	20180714	UniProt
UniProtKB	E5LCV6	E5LCV6		GO:0009060	GO_REF:0000002	IEA	InterPro:IPR000883	P	Cytochrome c oxidase subunit 1		protein	taxon:159738	20180714	InterPro
UniProtKB	E5LCV6	E5LCV6		GO:0016020	GO_REF:0000038	IEA	UniProtKB-KW:KW-0472	C	Cytochrome c oxidase subunit 1		protein	taxon:159738	20180714	UniProt
UniProtKB	E5LCV6	E5LCV6		GO:0016021	GO_REF:0000002	IEA	InterPro:IPR000883	C	Cytochrome c oxidase subunit 1		protein	taxon:159738	20180714	InterPro
UniProtKB	E5LCV6	E5LCV6		GO:0016021	GO_REF:0000038	IEA	UniProtKB-KW:KW-0812	C	Cytochrome c oxidase subunit 1		protein	taxon:159738	20180714	UniProt
UniProtKB	E5LCV6	E5LCV6		GO:0016491	GO_REF:0000038	IEA	UniProtKB-KW:KW-0560	F	Cytochrome c oxidase subunit 1		protein	taxon:159738	20180714	UniProt
UniProtKB	E5LCV6	E5LCV6		GO:0020037	GO_REF:0000002	IEA	InterPro:IPR000883	F	Cytochrome c oxidase subunit 1		protein	taxon:159738	20180714	InterPro
UniProtKB	E5LCV6	E5LCV6		GO:0022900	GO_REF:0000108	IEA	GO:0004129	P	Cytochrome c oxidase subunit 1		protein	taxon:159738	20180714	GOC
UniProtKB	E5LCV6	E5LCV6		GO:0046872	GO_REF:0000038	IEA	UniProtKB-KW:KW-0479	F	Cytochrome c oxidase subunit 1		protein	taxon:159738	20180714	UniProt
UniProtKB	E5LCV6	E5LCV6		GO:0055114	GO_REF:0000002	IEA	InterPro:IPR000883|InterPro:IPR023616|InterPro:IPR036927	P	Cytochrome c oxidase subunit 1		protein	taxon:159738	20180714	InterPro
UniProtKB	E5LCV6	E5LCV6		GO:0055114	GO_REF:0000038	IEA	UniProtKB-KW:KW-0249	P	Cytochrome c oxidase subunit 1		protein	taxon:159738	20180714	UniProt
UniProtKB	E5LCV6	E5LCV6		GO:0055114	GO_REF:0000038	IEA	UniProtKB-KW:KW-0560	P	Cytochrome c oxidase subunit 1		protein	taxon:159738	20180714	UniProt
UniProtKB	E5LCV6	E5LCV6		GO:0070469	GO_REF:0000038	IEA	UniProtKB-KW:KW-0679	C	Cytochrome c oxidase subunit 1		protein	taxon:159738	20180714	UniProt
UniProtKB	E5LCV6	E5LCV6		GO:1902600	GO_REF:0000108	IEA	GO:0004129	P	Cytochrome c oxidase subunit 1		protein	taxon:159738	20180714	GOC
UniProtKB	Q08L67	COI		GO:0004129	GO_REF:0000002	IEA	InterPro:IPR000883|InterPro:IPR023615|InterPro:IPR023616	F	Cytochrome c oxidase subunit 1	COI	protein	taxon:178403	20180714	InterPro
UniProtKB	Q08L67	COI		GO:0004129	GO_REF:0000003	IEA	EC:1.9.3.1	F	Cytochrome c oxidase subunit 1	COI	protein	taxon:178403	20180714	UniProt
UniProtKB	Q08L67	COI		GO:0005739	GO_REF:0000038	IEA	UniProtKB-KW:KW-0496	C	Cytochrome c oxidase subunit 1	COI	protein	taxon:178403	20180714	UniProt
UniProtKB	Q08L67	COI		GO:0005743	GO_REF:0000038	IEA	UniProtKB-KW:KW-0999	C	Cytochrome c oxidase subunit 1	COI	protein	taxon:178403	20180714	UniProt
UniProtKB	Q08L67	COI		GO:0005743	GO_REF:0000040	IEA	UniProtKB-SubCell:SL-0168	C	Cytochrome c oxidase subunit 1	COI	protein	taxon:178403	20180714	UniProt
UniProtKB	Q08L67	COI		GO:0006119	GO_REF:0000041	IEA	UniPathway:UPA00705	P	Cytochrome c oxidase subunit 1	COI	protein	taxon:178403	20180714	UniProt
UniProtKB	Q08L67	COI		GO:0009060	GO_REF:0000002	IEA	InterPro:IPR000883	P	Cytochrome c oxidase subunit 1	COI	protein	taxon:178403	20180714	InterPro
UniProtKB	Q08L67	COI		GO:0016020	GO_REF:0000038	IEA	UniProtKB-KW:KW-0472	C	Cytochrome c oxidase subunit 1	COI	protein	taxon:178403	20180714	UniProt
UniProtKB	Q08L67	COI		GO:0016021	GO_REF:0000002	IEA	InterPro:IPR000883	C	Cytochrome c oxidase subunit 1	COI	protein	taxon:178403	20180714	InterPro
UniProtKB	Q08L67	COI		GO:0016021	GO_REF:0000038	IEA	UniProtKB-KW:KW-0812	C	Cytochrome c oxidase subunit 1	COI	protein	taxon:178403	20180714	UniProt
UniProtKB	Q08L67	COI		GO:0016491	GO_REF:0000038	IEA	UniProtKB-KW:KW-0560	F	Cytochrome c oxidase subunit 1	COI	protein	taxon:178403	20180714	UniProt
UniProtKB	Q08L67	COI		GO:0020037	GO_REF:0000002	IEA	InterPro:IPR000883	F	Cytochrome c oxidase subunit 1	COI	protein	taxon:178403	20180714	InterPro
UniProtKB	Q08L67	COI		GO:0022900	GO_REF:0000108	IEA	GO:0004129	P	Cytochrome c oxidase subunit 1	COI	protein	taxon:178403	20180714	GOC
UniProtKB	Q08L67	COI		GO:0046872	GO_REF:0000038	IEA	UniProtKB-KW:KW-0479	F	Cytochrome c oxidase subunit 1	COI	protein	taxon:178403	20180714	UniProt
UniProtKB	Q08L67	COI		GO:0055114	GO_REF:0000002	IEA	InterPro:IPR000883|InterPro:IPR023615|InterPro:IPR023616|InterPro:IPR036927	P	Cytochrome c oxidase subunit 1	COI	protein	taxon:178403	20180714	InterPro
UniProtKB	Q08L67	COI		GO:0055114	GO_REF:0000038	IEA	UniProtKB-KW:KW-0249	P	Cytochrome c oxidase subunit 1	COI	protein	taxon:178403	20180714	UniProt
UniProtKB	Q08L67	COI		GO:0055114	GO_REF:0000038	IEA	UniProtKB-KW:KW-0560	P	Cytochrome c oxidase subunit 1	COI	protein	taxon:178403	20180714	UniProt
UniProtKB	Q08L67	COI		GO:0070469	GO_REF:0000038	IEA	UniProtKB-KW:KW-0679	C	Cytochrome c oxidase subunit 1	COI	protein	taxon:178403	20180714	UniProt
UniProtKB	Q08L67	COI		GO:1902600	GO_REF:0000108	IEA	GO:0004129	P	Cytochrome c oxidase subunit 1	COI	protein	taxon:178403	20180714	GOC
UniProtKB	Q08L68	COI		GO:0004129	GO_REF:0000002	IEA	InterPro:IPR000883|InterPro:IPR023615|InterPro:IPR023616	F	Cytochrome c oxidase subunit 1	COI	protein	taxon:178403	20180714	InterPro
UniProtKB	Q08L68	COI		GO:0004129	GO_REF:0000003	IEA	EC:1.9.3.1	F	Cytochrome c oxidase subunit 1	COI	protein	taxon:178403	20180714	UniProt
UniProtKB	Q08L68	COI		GO:0005739	GO_REF:0000038	IEA	UniProtKB-KW:KW-0496	C	Cytochrome c oxidase subunit 1	COI	protein	taxon:178403	20180714	UniProt
UniProtKB	Q08L68	COI		GO:0005743	GO_REF:0000038	IEA	UniProtKB-KW:KW-0999	C	Cytochrome c oxidase subunit 1	COI	protein	taxon:178403	20180714	UniProt
UniProtKB	Q08L68	COI		GO:0005743	GO_REF:0000040	IEA	UniProtKB-SubCell:SL-0168	C	Cytochrome c oxidase subunit 1	COI	protein	taxon:178403	20180714	UniProt
UniProtKB	Q08L68	COI		GO:0006119	GO_REF:0000041	IEA	UniPathway:UPA00705	P	Cytochrome c oxidase subunit 1	COI	protein	taxon:178403	20180714	UniProt
UniProtKB	Q08L68	COI		GO:0009060	GO_REF:0000002	IEA	InterPro:IPR000883	P	Cytochrome c oxidase subunit 1	COI	protein	taxon:178403	20180714	InterPro
UniProtKB	Q08L68	COI		GO:0016020	GO_REF:0000038	IEA	UniProtKB-KW:KW-0472	C	Cytochrome c oxidase subunit 1	COI	protein	taxon:178403	20180714	UniProt
UniProtKB	Q08L68	COI		GO:0016021	GO_REF:0000002	IEA	InterPro:IPR000883	C	Cytochrome c oxidase subunit 1	COI	protein	taxon:178403	20180714	InterPro
UniProtKB	Q08L68	COI		GO:0016021	GO_REF:0000038	IEA	UniProtKB-KW:KW-0812	C	Cytochrome c oxidase subunit 1	COI	protein	taxon:178403	20180714	UniProt
UniProtKB	Q08L68	COI		GO:0016491	GO_REF:0000038	IEA	UniProtKB-KW:KW-0560	F	Cytochrome c oxidase subunit 1	COI	protein	taxon:178403	20180714	UniProt
UniProtKB	Q08L68	COI		GO:0020037	GO_REF:0000002	IEA	InterPro:IPR000883	F	Cytochrome c oxidase subunit 1	COI	protein	taxon:178403	20180714	InterPro
UniProtKB	Q08L68	COI		GO:0022900	GO_REF:0000108	IEA	GO:0004129	P	Cytochrome c oxidase subunit 1	COI	protein	taxon:178403	20180714	GOC
UniProtKB	Q08L68	COI		GO:0046872	GO_REF:0000038	IEA	UniProtKB-KW:KW-0479	F	Cytochrome c oxidase subunit 1	COI	protein	taxon:178403	20180714	UniProt
UniProtKB	Q08L68	COI		GO:0055114	GO_REF:0000002	IEA	InterPro:IPR000883|InterPro:IPR023615|InterPro:IPR023616|InterPro:IPR036927	P	Cytochrome c oxidase subunit 1	COI	protein	taxon:178403	20180714	InterPro
UniProtKB	Q08L68	COI		GO:0055114	GO_REF:0000038	IEA	UniProtKB-KW:KW-0249	P	Cytochrome c oxidase subunit 1	COI	protein	taxon:178403	20180714	UniProt
UniProtKB	Q08L68	COI		GO:0055114	GO_REF:0000038	IEA	UniProtKB-KW:KW-0560	P	Cytochrome c oxidase subunit 1	COI	protein	taxon:178403	20180714	UniProt
UniProtKB	Q08L68	COI		GO:0070469	GO_REF:0000038	IEA	UniProtKB-KW:KW-0679	C	Cytochrome c oxidase subunit 1	COI	protein	taxon:178403	20180714	UniProt
UniProtKB	Q08L68	COI		GO:1902600	GO_REF:0000108	IEA	GO:0004129	P	Cytochrome c oxidase subunit 1	COI	protein	taxon:178403	20180714	GOC
UniProtKB	Q6W2K9	Q6W2K9		GO:0005739	GO_REF:0000038	IEA	UniProtKB-KW:KW-0496	C	ATP synthase subunit a		protein	taxon:159738	20180714	UniProt
UniProtKB	Q6W2K9	Q6W2K9		GO:0005743	GO_REF:0000040	IEA	UniProtKB-SubCell:SL-0168	C	ATP synthase subunit a		protein	taxon:159738	20180714	UniProt
UniProtKB	Q6W2K9	Q6W2K9		GO:0015078	GO_REF:0000002	IEA	InterPro:IPR000568	F	ATP synthase subunit a		protein	taxon:159738	20180714	InterPro
UniProtKB	Q6W2K9	Q6W2K9		GO:0015986	GO_REF:0000002	IEA	InterPro:IPR000568	P	ATP synthase subunit a		protein	taxon:159738	20180714	InterPro
UniProtKB	Q6W2K9	Q6W2K9		GO:0016020	GO_REF:0000038	IEA	UniProtKB-KW:KW-0472	C	ATP synthase subunit a		protein	taxon:159738	20180714	UniProt
UniProtKB	Q6W2K9	Q6W2K9		GO:0016021	GO_REF:0000038	IEA	UniProtKB-KW:KW-0812	C	ATP synthase subunit a		protein	taxon:159738	20180714	UniProt
UniProtKB	Q6W2K9	Q6W2K9		GO:0045263	GO_REF:0000002	IEA	InterPro:IPR000568	C	ATP synthase subunit a		protein	taxon:159738	20180714	InterPro
UniProtKB	Q6W2L5	Q6W2L5		GO:0005739	GO_REF:0000038	IEA	UniProtKB-KW:KW-0496	C	ATP synthase subunit a		protein	taxon:159738	20180714	UniProt
UniProtKB	Q6W2L5	Q6W2L5		GO:0005743	GO_REF:0000040	IEA	UniProtKB-SubCell:SL-0168	C	ATP synthase subunit a		protein	taxon:159738	20180714	UniProt
UniProtKB	Q6W2L5	Q6W2L5		GO:0015078	GO_REF:0000002	IEA	InterPro:IPR000568	F	ATP synthase subunit a		protein	taxon:159738	20180714	InterPro
UniProtKB	Q6W2L5	Q6W2L5		GO:0015986	GO_REF:0000002	IEA	InterPro:IPR000568	P	ATP synthase subunit a		protein	taxon:159738	20180714	InterPro
UniProtKB	Q6W2L5	Q6W2L5		GO:0016020	GO_REF:0000038	IEA	UniProtKB-KW:KW-0472	C	ATP synthase subunit a		protein	taxon:159738	20180714	UniProt
UniProtKB	Q6W2L5	Q6W2L5		GO:0016021	GO_REF:0000038	IEA	UniProtKB-KW:KW-0812	C	ATP synthase subunit a		protein	taxon:159738	20180714	UniProt
UniProtKB	Q6W2L5	Q6W2L5		GO:0045263	GO_REF:0000002	IEA	InterPro:IPR000568	C	ATP synthase subunit a		protein	taxon:159738	20180714	InterPro
UniProtKB	Q6W2L6	Q6W2L6		GO:0005739	GO_REF:0000038	IEA	UniProtKB-KW:KW-0496	C	ATP synthase subunit a		protein	taxon:159738	20180714	UniProt
UniProtKB	Q6W2L6	Q6W2L6		GO:0005743	GO_REF:0000040	IEA	UniProtKB-SubCell:SL-0168	C	ATP synthase subunit a		protein	taxon:159738	20180714	UniProt
UniProtKB	Q6W2L6	Q6W2L6		GO:0015078	GO_REF:0000002	IEA	InterPro:IPR000568	F	ATP synthase subunit a		protein	taxon:159738	20180714	InterPro
UniProtKB	Q6W2L6	Q6W2L6		GO:0015986	GO_REF:0000002	IEA	InterPro:IPR000568	P	ATP synthase subunit a		protein	taxon:159738	20180714	InterPro
UniProtKB	Q6W2L6	Q6W2L6		GO:0016020	GO_REF:0000038	IEA	UniProtKB-KW:KW-0472	C	ATP synthase subunit a		protein	taxon:159738	20180714	UniProt
UniProtKB	Q6W2L6	Q6W2L6		GO:0016021	GO_REF:0000038	IEA	UniProtKB-KW:KW-0812	C	ATP synthase subunit a		protein	taxon:159738	20180714	UniProt
UniProtKB	Q6W2L6	Q6W2L6		GO:0045263	GO_REF:0000002	IEA	InterPro:IPR000568	C	ATP synthase subunit a		protein	taxon:159738	20180714	InterPro
UniProtKB	Q6W2L7	Q6W2L7		GO:0005739	GO_REF:0000038	IEA	UniProtKB-KW:KW-0496	C	ATP synthase subunit a		protein	taxon:159738	20180714	UniProt
UniProtKB	Q6W2L7	Q6W2L7		GO:0005743	GO_REF:0000040	IEA	UniProtKB-SubCell:SL-0168	C	ATP synthase subunit a		protein	taxon:159738	20180714	UniProt
UniProtKB	Q6W2L7	Q6W2L7		GO:0015078	GO_REF:0000002	IEA	InterPro:IPR000568	F	ATP synthase subunit a		protein	taxon:159738	20180714	InterPro
UniProtKB	Q6W2L7	Q6W2L7		GO:0015986	GO_REF:0000002	IEA	InterPro:IPR000568	P	ATP synthase subunit a		protein	taxon:159738	20180714	InterPro
UniProtKB	Q6W2L7	Q6W2L7		GO:0016020	GO_REF:0000038	IEA	UniProtKB-KW:KW-0472	C	ATP synthase subunit a		protein	taxon:159738	20180714	UniProt
UniProtKB	Q6W2L7	Q6W2L7		GO:0016021	GO_REF:0000038	IEA	UniProtKB-KW:KW-0812	C	ATP synthase subunit a		protein	taxon:159738	20180714	UniProt
UniProtKB	Q6W2L7	Q6W2L7		GO:0045263	GO_REF:0000002	IEA	InterPro:IPR000568	C	ATP synthase subunit a		protein	taxon:159738	20180714	InterPro
UniProtKB	Q6W2M0	Q6W2M0		GO:0005739	GO_REF:0000038	IEA	UniProtKB-KW:KW-0496	C	ATP synthase subunit a		protein	taxon:159738	20180714	UniProt
UniProtKB	Q6W2M0	Q6W2M0		GO:0005743	GO_REF:0000040	IEA	UniProtKB-SubCell:SL-0168	C	ATP synthase subunit a		protein	taxon:159738	20180714	UniProt
UniProtKB	Q6W2M0	Q6W2M0		GO:0015078	GO_REF:0000002	IEA	InterPro:IPR000568	F	ATP synthase subunit a		protein	taxon:159738	20180714	InterPro
UniProtKB	Q6W2M0	Q6W2M0		GO:0015986	GO_REF:0000002	IEA	InterPro:IPR000568	P	ATP synthase subunit a		protein	taxon:159738	20180714	InterPro
UniProtKB	Q6W2M0	Q6W2M0		GO:0016020	GO_REF:0000038	IEA	UniProtKB-KW:KW-0472	C	ATP synthase subunit a		protein	taxon:159738	20180714	UniProt
UniProtKB	Q6W2M0	Q6W2M0		GO:0016021	GO_REF:0000038	IEA	UniProtKB-KW:KW-0812	C	ATP synthase subunit a		protein	taxon:159738	20180714	UniProt
UniProtKB	Q6W2M0	Q6W2M0		GO:0045263	GO_REF:0000002	IEA	InterPro:IPR000568	C	ATP synthase subunit a		protein	taxon:159738	20180714	InterPro
UniProtKB	Q6W2M6	Q6W2M6		GO:0005739	GO_REF:0000038	IEA	UniProtKB-KW:KW-0496	C	ATP synthase subunit a		protein	taxon:159738	20180714	UniProt
UniProtKB	Q6W2M6	Q6W2M6		GO:0005743	GO_REF:0000040	IEA	UniProtKB-SubCell:SL-0168	C	ATP synthase subunit a		protein	taxon:159738	20180714	UniProt
UniProtKB	Q6W2M6	Q6W2M6		GO:0015078	GO_REF:0000002	IEA	InterPro:IPR000568	F	ATP synthase subunit a		protein	taxon:159738	20180714	InterPro
UniProtKB	Q6W2M6	Q6W2M6		GO:0015986	GO_REF:0000002	IEA	InterPro:IPR000568	P	ATP synthase subunit a		protein	taxon:159738	20180714	InterPro
UniProtKB	Q6W2M6	Q6W2M6		GO:0016020	GO_REF:0000038	IEA	UniProtKB-KW:KW-0472	C	ATP synthase subunit a		protein	taxon:159738	20180714	UniProt
UniProtKB	Q6W2M6	Q6W2M6		GO:0016021	GO_REF:0000038	IEA	UniProtKB-KW:KW-0812	C	ATP synthase subunit a		protein	taxon:159738	20180714	UniProt
UniProtKB	Q6W2M6	Q6W2M6		GO:0045263	GO_REF:0000002	IEA	InterPro:IPR000568	C	ATP synthase subunit a		protein	taxon:159738	20180714	InterPro
UniProtKB	Q6W2N1	Q6W2N1		GO:0005739	GO_REF:0000038	IEA	UniProtKB-KW:KW-0496	C	ATP synthase subunit a		protein	taxon:159738	20180714	UniProt
UniProtKB	Q6W2N1	Q6W2N1		GO:0005743	GO_REF:0000040	IEA	UniProtKB-SubCell:SL-0168	C	ATP synthase subunit a		protein	taxon:159738	20180714	UniProt
UniProtKB	Q6W2N1	Q6W2N1		GO:0015078	GO_REF:0000002	IEA	InterPro:IPR000568	F	ATP synthase subunit a		protein	taxon:159738	20180714	InterPro
UniProtKB	Q6W2N1	Q6W2N1		GO:0015986	GO_REF:0000002	IEA	InterPro:IPR000568	P	ATP synthase subunit a		protein	taxon:159738	20180714	InterPro
UniProtKB	Q6W2N1	Q6W2N1		GO:0016020	GO_REF:0000038	IEA	UniProtKB-KW:KW-0472	C	ATP synthase subunit a		protein	taxon:159738	20180714	UniProt
UniProtKB	Q6W2N1	Q6W2N1		GO:0016021	GO_REF:0000038	IEA	UniProtKB-KW:KW-0812	C	ATP synthase subunit a		protein	taxon:159738	20180714	UniProt
UniProtKB	Q6W2N1	Q6W2N1		GO:0045263	GO_REF:0000002	IEA	InterPro:IPR000568	C	ATP synthase subunit a		protein	taxon:159738	20180714	InterPro
UniProtKB	Q6W2N4	Q6W2N4		GO:0005739	GO_REF:0000038	IEA	UniProtKB-KW:KW-0496	C	ATP synthase subunit a		protein	taxon:159738	20180714	UniProt
UniProtKB	Q6W2N4	Q6W2N4		GO:0005743	GO_REF:0000040	IEA	UniProtKB-SubCell:SL-0168	C	ATP synthase subunit a		protein	taxon:159738	20180714	UniProt
UniProtKB	Q6W2N4	Q6W2N4		GO:0015078	GO_REF:0000002	IEA	InterPro:IPR000568	F	ATP synthase subunit a		protein	taxon:159738	20180714	InterPro
UniProtKB	Q6W2N4	Q6W2N4		GO:0015986	GO_REF:0000002	IEA	InterPro:IPR000568	P	ATP synthase subunit a		protein	taxon:159738	20180714	InterPro
UniProtKB	Q6W2N4	Q6W2N4		GO:0016020	GO_REF:0000038	IEA	UniProtKB-KW:KW-0472	C	ATP synthase subunit a		protein	taxon:159738	20180714	UniProt
UniProtKB	Q6W2N4	Q6W2N4		GO:0016021	GO_REF:0000038	IEA	UniProtKB-KW:KW-0812	C	ATP synthase subunit a		protein	taxon:159738	20180714	UniProt
UniProtKB	Q6W2N4	Q6W2N4		GO:0045263	GO_REF:0000002	IEA	InterPro:IPR000568	C	ATP synthase subunit a		protein	taxon:159738	20180714	InterPro
UniProtKB	Q85U46	COI		GO:0004129	GO_REF:0000002	IEA	InterPro:IPR000883|InterPro:IPR023616	F	Cytochrome c oxidase subunit 1	COI	protein	taxon:178403	20180714	InterPro
UniProtKB	Q85U46	COI		GO:0004129	GO_REF:0000003	IEA	EC:1.9.3.1	F	Cytochrome c oxidase subunit 1	COI	protein	taxon:178403	20180714	UniProt
UniProtKB	Q85U46	COI		GO:0005739	GO_REF:0000038	IEA	UniProtKB-KW:KW-0496	C	Cytochrome c oxidase subunit 1	COI	protein	taxon:178403	20180714	UniProt
UniProtKB	Q85U46	COI		GO:0005743	GO_REF:0000038	IEA	UniProtKB-KW:KW-0999	C	Cytochrome c oxidase subunit 1	COI	protein	taxon:178403	20180714	UniProt
UniProtKB	Q85U46	COI		GO:0005743	GO_REF:0000040	IEA	UniProtKB-SubCell:SL-0168	C	Cytochrome c oxidase subunit 1	COI	protein	taxon:178403	20180714	UniProt
UniProtKB	Q85U46	COI		GO:0006119	GO_REF:0000041	IEA	UniPathway:UPA00705	P	Cytochrome c oxidase subunit 1	COI	protein	taxon:178403	20180714	UniProt
UniProtKB	Q85U46	COI		GO:0009060	GO_REF:0000002	IEA	InterPro:IPR000883	P	Cytochrome c oxidase subunit 1	COI	protein	taxon:178403	20180714	InterPro
UniProtKB	Q85U46	COI		GO:0016020	GO_REF:0000038	IEA	UniProtKB-KW:KW-0472	C	Cytochrome c oxidase subunit 1	COI	protein	taxon:178403	20180714	UniProt
UniProtKB	Q85U46	COI		GO:0016021	GO_REF:0000002	IEA	InterPro:IPR000883	C	Cytochrome c oxidase subunit 1	COI	protein	taxon:178403	20180714	InterPro
UniProtKB	Q85U46	COI		GO:0016021	GO_REF:0000038	IEA	UniProtKB-KW:KW-0812	C	Cytochrome c oxidase subunit 1	COI	protein	taxon:178403	20180714	UniProt
UniProtKB	Q85U46	COI		GO:0016491	GO_REF:0000038	IEA	UniProtKB-KW:KW-0560	F	Cytochrome c oxidase subunit 1	COI	protein	taxon:178403	20180714	UniProt
UniProtKB	Q85U46	COI		GO:0020037	GO_REF:0000002	IEA	InterPro:IPR000883	F	Cytochrome c oxidase subunit 1	COI	protein	taxon:178403	20180714	InterPro
UniProtKB	Q85U46	COI		GO:0022900	GO_REF:0000108	IEA	GO:0004129	P	Cytochrome c oxidase subunit 1	COI	protein	taxon:178403	20180714	GOC
UniProtKB	Q85U46	COI		GO:0046872	GO_REF:0000038	IEA	UniProtKB-KW:KW-0479	F	Cytochrome c oxidase subunit 1	COI	protein	taxon:178403	20180714	UniProt
UniProtKB	Q85U46	COI		GO:0055114	GO_REF:0000002	IEA	InterPro:IPR000883|InterPro:IPR023616|InterPro:IPR036927	P	Cytochrome c oxidase subunit 1	COI	protein	taxon:178403	20180714	InterPro
UniProtKB	Q85U46	COI		GO:0055114	GO_REF:0000038	IEA	UniProtKB-KW:KW-0249	P	Cytochrome c oxidase subunit 1	COI	protein	taxon:178403	20180714	UniProt
UniProtKB	Q85U46	COI		GO:0055114	GO_REF:0000038	IEA	UniProtKB-KW:KW-0560	P	Cytochrome c oxidase subunit 1	COI	protein	taxon:178403	20180714	UniProt
UniProtKB	Q85U46	COI		GO:0070469	GO_REF:0000038	IEA	UniProtKB-KW:KW-0679	C	Cytochrome c oxidase subunit 1	COI	protein	taxon:178403	20180714	UniProt
UniProtKB	Q85U46	COI		GO:1902600	GO_REF:0000108	IEA	GO:0004129	P	Cytochrome c oxidase subunit 1	COI	protein	taxon:178403	20180714	GOC
UniProtKB	Q8LUJ6	COI		GO:0004129	GO_REF:0000002	IEA	InterPro:IPR000883|InterPro:IPR023616	F	Cytochrome c oxidase subunit 1	COI	protein	taxon:159738	20180714	InterPro
UniProtKB	Q8LUJ6	COI		GO:0004129	GO_REF:0000003	IEA	EC:1.9.3.1	F	Cytochrome c oxidase subunit 1	COI	protein	taxon:159738	20180714	UniProt
UniProtKB	Q8LUJ6	COI		GO:0005739	GO_REF:0000038	IEA	UniProtKB-KW:KW-0496	C	Cytochrome c oxidase subunit 1	COI	protein	taxon:159738	20180714	UniProt
UniProtKB	Q8LUJ6	COI		GO:0005743	GO_REF:0000038	IEA	UniProtKB-KW:KW-0999	C	Cytochrome c oxidase subunit 1	COI	protein	taxon:159738	20180714	UniProt
UniProtKB	Q8LUJ6	COI		GO:0005743	GO_REF:0000040	IEA	UniProtKB-SubCell:SL-0168	C	Cytochrome c oxidase subunit 1	COI	protein	taxon:159738	20180714	UniProt
UniProtKB	Q8LUJ6	COI		GO:0006119	GO_REF:0000041	IEA	UniPathway:UPA00705	P	Cytochrome c oxidase subunit 1	COI	protein	taxon:159738	20180714	UniProt
UniProtKB	Q8LUJ6	COI		GO:0009060	GO_REF:0000002	IEA	InterPro:IPR000883	P	Cytochrome c oxidase subunit 1	COI	protein	taxon:159738	20180714	InterPro
UniProtKB	Q8LUJ6	COI		GO:0016020	GO_REF:0000038	IEA	UniProtKB-KW:KW-0472	C	Cytochrome c oxidase subunit 1	COI	protein	taxon:159738	20180714	UniProt
UniProtKB	Q8LUJ6	COI		GO:0016021	GO_REF:0000002	IEA	InterPro:IPR000883	C	Cytochrome c oxidase subunit 1	COI	protein	taxon:159738	20180714	InterPro
UniProtKB	Q8LUJ6	COI		GO:0016021	GO_REF:0000038	IEA	UniProtKB-KW:KW-0812	C	Cytochrome c oxidase subunit 1	COI	protein	taxon:159738	20180714	UniProt
UniProtKB	Q8LUJ6	COI		GO:0016491	GO_REF:0000038	IEA	UniProtKB-KW:KW-0560	F	Cytochrome c oxidase subunit 1	COI	protein	taxon:159738	20180714	UniProt
UniProtKB	Q8LUJ6	COI		GO:0020037	GO_REF:0000002	IEA	InterPro:IPR000883	F	Cytochrome c oxidase subunit 1	COI	protein	taxon:159738	20180714	InterPro
UniProtKB	Q8LUJ6	COI		GO:0022900	GO_REF:0000108	IEA	GO:0004129	P	Cytochrome c oxidase subunit 1	COI	protein	taxon:159738	20180714	GOC
UniProtKB	Q8LUJ6	COI		GO:0046872	GO_REF:0000038	IEA	UniProtKB-KW:KW-0479	F	Cytochrome c oxidase subunit 1	COI	protein	taxon:159738	20180714	UniProt
UniProtKB	Q8LUJ6	COI		GO:0055114	GO_REF:0000002	IEA	InterPro:IPR000883|InterPro:IPR023616|InterPro:IPR036927	P	Cytochrome c oxidase subunit 1	COI	protein	taxon:159738	20180714	InterPro
UniProtKB	Q8LUJ6	COI		GO:0055114	GO_REF:0000038	IEA	UniProtKB-KW:KW-0249	P	Cytochrome c oxidase subunit 1	COI	protein	taxon:159738	20180714	UniProt
UniProtKB	Q8LUJ6	COI		GO:0055114	GO_REF:0000038	IEA	UniProtKB-KW:KW-0560	P	Cytochrome c oxidase subunit 1	COI	protein	taxon:159738	20180714	UniProt
UniProtKB	Q8LUJ6	COI		GO:0070469	GO_REF:0000038	IEA	UniProtKB-KW:KW-0679	C	Cytochrome c oxidase subunit 1	COI	protein	taxon:159738	20180714	UniProt
UniProtKB	Q8LUJ6	COI		GO:1902600	GO_REF:0000108	IEA	GO:0004129	P	Cytochrome c oxidase subunit 1	COI	protein	taxon:159738	20180714	GOC
UniProtKB	Q8M188	COI		GO:0004129	GO_REF:0000002	IEA	InterPro:IPR000883|InterPro:IPR023616	F	Cytochrome c oxidase subunit 1	COI	protein	taxon:159738	20180714	InterPro
UniProtKB	Q8M188	COI		GO:0004129	GO_REF:0000003	IEA	EC:1.9.3.1	F	Cytochrome c oxidase subunit 1	COI	protein	taxon:159738	20180714	UniProt
UniProtKB	Q8M188	COI		GO:0005739	GO_REF:0000038	IEA	UniProtKB-KW:KW-0496	C	Cytochrome c oxidase subunit 1	COI	protein	taxon:159738	20180714	UniProt
UniProtKB	Q8M188	COI		GO:0005743	GO_REF:0000038	IEA	UniProtKB-KW:KW-0999	C	Cytochrome c oxidase subunit 1	COI	protein	taxon:159738	20180714	UniProt
UniProtKB	Q8M188	COI		GO:0005743	GO_REF:0000040	IEA	UniProtKB-SubCell:SL-0168	C	Cytochrome c oxidase subunit 1	COI	protein	taxon:159738	20180714	UniProt
UniProtKB	Q8M188	COI		GO:0006119	GO_REF:0000041	IEA	UniPathway:UPA00705	P	Cytochrome c oxidase subunit 1	COI	protein	taxon:159738	20180714	UniProt
UniProtKB	Q8M188	COI		GO:0009060	GO_REF:0000002	IEA	InterPro:IPR000883	P	Cytochrome c oxidase subunit 1	COI	protein	taxon:159738	20180714	InterPro
UniProtKB	Q8M188	COI		GO:0016020	GO_REF:0000038	IEA	UniProtKB-KW:KW-0472	C	Cytochrome c oxidase subunit 1	COI	protein	taxon:159738	20180714	UniProt
UniProtKB	Q8M188	COI		GO:0016021	GO_REF:0000002	IEA	InterPro:IPR000883	C	Cytochrome c oxidase subunit 1	COI	protein	taxon:159738	20180714	InterPro
UniProtKB	Q8M188	COI		GO:0016021	GO_REF:0000038	IEA	UniProtKB-KW:KW-0812	C	Cytochrome c oxidase subunit 1	COI	protein	taxon:159738	20180714	UniProt
UniProtKB	Q8M188	COI		GO:0016491	GO_REF:0000038	IEA	UniProtKB-KW:KW-0560	F	Cytochrome c oxidase subunit 1	COI	protein	taxon:159738	20180714	UniProt
UniProtKB	Q8M188	COI		GO:0020037	GO_REF:0000002	IEA	InterPro:IPR000883	F	Cytochrome c oxidase subunit 1	COI	protein	taxon:159738	20180714	InterPro
UniProtKB	Q8M188	COI		GO:0022900	GO_REF:0000108	IEA	GO:0004129	P	Cytochrome c oxidase subunit 1	COI	protein	taxon:159738	20180714	GOC
UniProtKB	Q8M188	COI		GO:0046872	GO_REF:0000038	IEA	UniProtKB-KW:KW-0479	F	Cytochrome c oxidase subunit 1	COI	protein	taxon:159738	20180714	UniProt
UniProtKB	Q8M188	COI		GO:0055114	GO_REF:0000002	IEA	InterPro:IPR000883|InterPro:IPR023616|InterPro:IPR036927	P	Cytochrome c oxidase subunit 1	COI	protein	taxon:159738	20180714	InterPro
UniProtKB	Q8M188	COI		GO:0055114	GO_REF:0000038	IEA	UniProtKB-KW:KW-0249	P	Cytochrome c oxidase subunit 1	COI	protein	taxon:159738	20180714	UniProt
UniProtKB	Q8M188	COI		GO:0055114	GO_REF:0000038	IEA	UniProtKB-KW:KW-0560	P	Cytochrome c oxidase subunit 1	COI	protein	taxon:159738	20180714	UniProt
UniProtKB	Q8M188	COI		GO:0070469	GO_REF:0000038	IEA	UniProtKB-KW:KW-0679	C	Cytochrome c oxidase subunit 1	COI	protein	taxon:159738	20180714	UniProt
UniProtKB	Q8M188	COI		GO:1902600	GO_REF:0000108	IEA	GO:0004129	P	Cytochrome c oxidase subunit 1	COI	protein	taxon:159738	20180714	GOC
UniProtKB	Q8M189	COI		GO:0004129	GO_REF:0000002	IEA	InterPro:IPR000883|InterPro:IPR023616	F	Cytochrome c oxidase subunit 1	COI	protein	taxon:159738	20180714	InterPro
UniProtKB	Q8M189	COI		GO:0004129	GO_REF:0000003	IEA	EC:1.9.3.1	F	Cytochrome c oxidase subunit 1	COI	protein	taxon:159738	20180714	UniProt
UniProtKB	Q8M189	COI		GO:0005739	GO_REF:0000038	IEA	UniProtKB-KW:KW-0496	C	Cytochrome c oxidase subunit 1	COI	protein	taxon:159738	20180714	UniProt
UniProtKB	Q8M189	COI		GO:0005743	GO_REF:0000038	IEA	UniProtKB-KW:KW-0999	C	Cytochrome c oxidase subunit 1	COI	protein	taxon:159738	20180714	UniProt
UniProtKB	Q8M189	COI		GO:0005743	GO_REF:0000040	IEA	UniProtKB-SubCell:SL-0168	C	Cytochrome c oxidase subunit 1	COI	protein	taxon:159738	20180714	UniProt
UniProtKB	Q8M189	COI		GO:0006119	GO_REF:0000041	IEA	UniPathway:UPA00705	P	Cytochrome c oxidase subunit 1	COI	protein	taxon:159738	20180714	UniProt
UniProtKB	Q8M189	COI		GO:0009060	GO_REF:0000002	IEA	InterPro:IPR000883	P	Cytochrome c oxidase subunit 1	COI	protein	taxon:159738	20180714	InterPro
UniProtKB	Q8M189	COI		GO:0016020	GO_REF:0000038	IEA	UniProtKB-KW:KW-0472	C	Cytochrome c oxidase subunit 1	COI	protein	taxon:159738	20180714	UniProt
UniProtKB	Q8M189	COI		GO:0016021	GO_REF:0000002	IEA	InterPro:IPR000883	C	Cytochrome c oxidase subunit 1	COI	protein	taxon:159738	20180714	InterPro
UniProtKB	Q8M189	COI		GO:0016021	GO_REF:0000038	IEA	UniProtKB-KW:KW-0812	C	Cytochrome c oxidase subunit 1	COI	protein	taxon:159738	20180714	UniProt
UniProtKB	Q8M189	COI		GO:0016491	GO_REF:0000038	IEA	UniProtKB-KW:KW-0560	F	Cytochrome c oxidase subunit 1	COI	protein	taxon:159738	20180714	UniProt
UniProtKB	Q8M189	COI		GO:0020037	GO_REF:0000002	IEA	InterPro:IPR000883	F	Cytochrome c oxidase subunit 1	COI	protein	taxon:159738	20180714	InterPro
UniProtKB	Q8M189	COI		GO:0022900	GO_REF:0000108	IEA	GO:0004129	P	Cytochrome c oxidase subunit 1	COI	protein	taxon:159738	20180714	GOC
UniProtKB	Q8M189	COI		GO:0046872	GO_REF:0000038	IEA	UniProtKB-KW:KW-0479	F	Cytochrome c oxidase subunit 1	COI	protein	taxon:159738	20180714	UniProt
UniProtKB	Q8M189	COI		GO:0055114	GO_REF:0000002	IEA	InterPro:IPR000883|InterPro:IPR023616|InterPro:IPR036927	P	Cytochrome c oxidase subunit 1	COI	protein	taxon:159738	20180714	InterPro
UniProtKB	Q8M189	COI		GO:0055114	GO_REF:0000038	IEA	UniProtKB-KW:KW-0249	P	Cytochrome c oxidase subunit 1	COI	protein	taxon:159738	20180714	UniProt
UniProtKB	Q8M189	COI		GO:0055114	GO_REF:0000038	IEA	UniProtKB-KW:KW-0560	P	Cytochrome c oxidase subunit 1	COI	protein	taxon:159738	20180714	UniProt
UniProtKB	Q8M189	COI		GO:0070469	GO_REF:0000038	IEA	UniProtKB-KW:KW-0679	C	Cytochrome c oxidase subunit 1	COI	protein	taxon:159738	20180714	UniProt
UniProtKB	Q8M189	COI		GO:1902600	GO_REF:0000108	IEA	GO:0004129	P	Cytochrome c oxidase subunit 1	COI	protein	taxon:159738	20180714	GOC
UniProtKB	Q8M190	COI		GO:0004129	GO_REF:0000002	IEA	InterPro:IPR000883|InterPro:IPR023616	F	Cytochrome c oxidase subunit 1	COI	protein	taxon:159738	20180714	InterPro
UniProtKB	Q8M190	COI		GO:0004129	GO_REF:0000003	IEA	EC:1.9.3.1	F	Cytochrome c oxidase subunit 1	COI	protein	taxon:159738	20180714	UniProt
UniProtKB	Q8M190	COI		GO:0005739	GO_REF:0000038	IEA	UniProtKB-KW:KW-0496	C	Cytochrome c oxidase subunit 1	COI	protein	taxon:159738	20180714	UniProt
UniProtKB	Q8M190	COI		GO:0005743	GO_REF:0000038	IEA	UniProtKB-KW:KW-0999	C	Cytochrome c oxidase subunit 1	COI	protein	taxon:159738	20180714	UniProt
UniProtKB	Q8M190	COI		GO:0005743	GO_REF:0000040	IEA	UniProtKB-SubCell:SL-0168	C	Cytochrome c oxidase subunit 1	COI	protein	taxon:159738	20180714	UniProt
UniProtKB	Q8M190	COI		GO:0006119	GO_REF:0000041	IEA	UniPathway:UPA00705	P	Cytochrome c oxidase subunit 1	COI	protein	taxon:159738	20180714	UniProt
UniProtKB	Q8M190	COI		GO:0009060	GO_REF:0000002	IEA	InterPro:IPR000883	P	Cytochrome c oxidase subunit 1	COI	protein	taxon:159738	20180714	InterPro
UniProtKB	Q8M190	COI		GO:0016020	GO_REF:0000038	IEA	UniProtKB-KW:KW-0472	C	Cytochrome c oxidase subunit 1	COI	protein	taxon:159738	20180714	UniProt
UniProtKB	Q8M190	COI		GO:0016021	GO_REF:0000002	IEA	InterPro:IPR000883	C	Cytochrome c oxidase subunit 1	COI	protein	taxon:159738	20180714	InterPro
UniProtKB	Q8M190	COI		GO:0016021	GO_REF:0000038	IEA	UniProtKB-KW:KW-0812	C	Cytochrome c oxidase subunit 1	COI	protein	taxon:159738	20180714	UniProt
UniProtKB	Q8M190	COI		GO:0016491	GO_REF:0000038	IEA	UniProtKB-KW:KW-0560	F	Cytochrome c oxidase subunit 1	COI	protein	taxon:159738	20180714	UniProt
UniProtKB	Q8M190	COI		GO:0020037	GO_REF:0000002	IEA	InterPro:IPR000883	F	Cytochrome c oxidase subunit 1	COI	protein	taxon:159738	20180714	InterPro
UniProtKB	Q8M190	COI		GO:0022900	GO_REF:0000108	IEA	GO:0004129	P	Cytochrome c oxidase subunit 1	COI	protein	taxon:159738	20180714	GOC
UniProtKB	Q8M190	COI		GO:0046872	GO_REF:0000038	IEA	UniProtKB-KW:KW-0479	F	Cytochrome c oxidase subunit 1	COI	protein	taxon:159738	20180714	UniProt
UniProtKB	Q8M190	COI		GO:0055114	GO_REF:0000002	IEA	InterPro:IPR000883|InterPro:IPR023616|InterPro:IPR036927	P	Cytochrome c oxidase subunit 1	COI	protein	taxon:159738	20180714	InterPro
UniProtKB	Q8M190	COI		GO:0055114	GO_REF:0000038	IEA	UniProtKB-KW:KW-0249	P	Cytochrome c oxidase subunit 1	COI	protein	taxon:159738	20180714	UniProt
UniProtKB	Q8M190	COI		GO:0055114	GO_REF:0000038	IEA	UniProtKB-KW:KW-0560	P	Cytochrome c oxidase subunit 1	COI	protein	taxon:159738	20180714	UniProt
UniProtKB	Q8M190	COI		GO:0070469	GO_REF:0000038	IEA	UniProtKB-KW:KW-0679	C	Cytochrome c oxidase subunit 1	COI	protein	taxon:159738	20180714	UniProt
UniProtKB	Q8M190	COI		GO:1902600	GO_REF:0000108	IEA	GO:0004129	P	Cytochrome c oxidase subunit 1	COI	protein	taxon:159738	20180714	GOC
UniProtKB	Q8M191	COI		GO:0004129	GO_REF:0000002	IEA	InterPro:IPR000883|InterPro:IPR023616	F	Cytochrome c oxidase subunit 1	COI	protein	taxon:159738	20180714	InterPro
UniProtKB	Q8M191	COI		GO:0004129	GO_REF:0000003	IEA	EC:1.9.3.1	F	Cytochrome c oxidase subunit 1	COI	protein	taxon:159738	20180714	UniProt
UniProtKB	Q8M191	COI		GO:0005739	GO_REF:0000038	IEA	UniProtKB-KW:KW-0496	C	Cytochrome c oxidase subunit 1	COI	protein	taxon:159738	20180714	UniProt
UniProtKB	Q8M191	COI		GO:0005743	GO_REF:0000038	IEA	UniProtKB-KW:KW-0999	C	Cytochrome c oxidase subunit 1	COI	protein	taxon:159738	20180714	UniProt
UniProtKB	Q8M191	COI		GO:0005743	GO_REF:0000040	IEA	UniProtKB-SubCell:SL-0168	C	Cytochrome c oxidase subunit 1	COI	protein	taxon:159738	20180714	UniProt
UniProtKB	Q8M191	COI		GO:0006119	GO_REF:0000041	IEA	UniPathway:UPA00705	P	Cytochrome c oxidase subunit 1	COI	protein	taxon:159738	20180714	UniProt
UniProtKB	Q8M191	COI		GO:0009060	GO_REF:0000002	IEA	InterPro:IPR000883	P	Cytochrome c oxidase subunit 1	COI	protein	taxon:159738	20180714	InterPro
UniProtKB	Q8M191	COI		GO:0016020	GO_REF:0000038	IEA	UniProtKB-KW:KW-0472	C	Cytochrome c oxidase subunit 1	COI	protein	taxon:159738	20180714	UniProt
UniProtKB	Q8M191	COI		GO:0016021	GO_REF:0000002	IEA	InterPro:IPR000883	C	Cytochrome c oxidase subunit 1	COI	protein	taxon:159738	20180714	InterPro
UniProtKB	Q8M191	COI		GO:0016021	GO_REF:0000038	IEA	UniProtKB-KW:KW-0812	C	Cytochrome c oxidase subunit 1	COI	protein	taxon:159738	20180714	UniProt
UniProtKB	Q8M191	COI		GO:0016491	GO_REF:0000038	IEA	UniProtKB-KW:KW-0560	F	Cytochrome c oxidase subunit 1	COI	protein	taxon:159738	20180714	UniProt
UniProtKB	Q8M191	COI		GO:0020037	GO_REF:0000002	IEA	InterPro:IPR000883	F	Cytochrome c oxidase subunit 1	COI	protein	taxon:159738	20180714	InterPro
UniProtKB	Q8M191	COI		GO:0022900	GO_REF:0000108	IEA	GO:0004129	P	Cytochrome c oxidase subunit 1	COI	protein	taxon:159738	20180714	GOC
UniProtKB	Q8M191	COI		GO:0046872	GO_REF:0000038	IEA	UniProtKB-KW:KW-0479	F	Cytochrome c oxidase subunit 1	COI	protein	taxon:159738	20180714	UniProt
UniProtKB	Q8M191	COI		GO:0055114	GO_REF:0000002	IEA	InterPro:IPR000883|InterPro:IPR023616|InterPro:IPR036927	P	Cytochrome c oxidase subunit 1	COI	protein	taxon:159738	20180714	InterPro
UniProtKB	Q8M191	COI		GO:0055114	GO_REF:0000038	IEA	UniProtKB-KW:KW-0249	P	Cytochrome c oxidase subunit 1	COI	protein	taxon:159738	20180714	UniProt
UniProtKB	Q8M191	COI		GO:0055114	GO_REF:0000038	IEA	UniProtKB-KW:KW-0560	P	Cytochrome c oxidase subunit 1	COI	protein	taxon:159738	20180714	UniProt
UniProtKB	Q8M191	COI		GO:0070469	GO_REF:0000038	IEA	UniProtKB-KW:KW-0679	C	Cytochrome c oxidase subunit 1	COI	protein	taxon:159738	20180714	UniProt
UniProtKB	Q8M191	COI		GO:1902600	GO_REF:0000108	IEA	GO:0004129	P	Cytochrome c oxidase subunit 1	COI	protein	taxon:159738	20180714	GOC
UniProtKB	Q8M192	COI		GO:0004129	GO_REF:0000002	IEA	InterPro:IPR000883|InterPro:IPR023616	F	Cytochrome c oxidase subunit 1	COI	protein	taxon:159738	20180714	InterPro
UniProtKB	Q8M192	COI		GO:0004129	GO_REF:0000003	IEA	EC:1.9.3.1	F	Cytochrome c oxidase subunit 1	COI	protein	taxon:159738	20180714	UniProt
UniProtKB	Q8M192	COI		GO:0005739	GO_REF:0000038	IEA	UniProtKB-KW:KW-0496	C	Cytochrome c oxidase subunit 1	COI	protein	taxon:159738	20180714	UniProt
UniProtKB	Q8M192	COI		GO:0005743	GO_REF:0000038	IEA	UniProtKB-KW:KW-0999	C	Cytochrome c oxidase subunit 1	COI	protein	taxon:159738	20180714	UniProt
UniProtKB	Q8M192	COI		GO:0005743	GO_REF:0000040	IEA	UniProtKB-SubCell:SL-0168	C	Cytochrome c oxidase subunit 1	COI	protein	taxon:159738	20180714	UniProt
UniProtKB	Q8M192	COI		GO:0006119	GO_REF:0000041	IEA	UniPathway:UPA00705	P	Cytochrome c oxidase subunit 1	COI	protein	taxon:159738	20180714	UniProt
UniProtKB	Q8M192	COI		GO:0009060	GO_REF:0000002	IEA	InterPro:IPR000883	P	Cytochrome c oxidase subunit 1	COI	protein	taxon:159738	20180714	InterPro
UniProtKB	Q8M192	COI		GO:0016020	GO_REF:0000038	IEA	UniProtKB-KW:KW-0472	C	Cytochrome c oxidase subunit 1	COI	protein	taxon:159738	20180714	UniProt
UniProtKB	Q8M192	COI		GO:0016021	GO_REF:0000002	IEA	InterPro:IPR000883	C	Cytochrome c oxidase subunit 1	COI	protein	taxon:159738	20180714	InterPro
UniProtKB	Q8M192	COI		GO:0016021	GO_REF:0000038	IEA	UniProtKB-KW:KW-0812	C	Cytochrome c oxidase subunit 1	COI	protein	taxon:159738	20180714	UniProt
UniProtKB	Q8M192	COI		GO:0016491	GO_REF:0000038	IEA	UniProtKB-KW:KW-0560	F	Cytochrome c oxidase subunit 1	COI	protein	taxon:159738	20180714	UniProt
UniProtKB	Q8M192	COI		GO:0020037	GO_REF:0000002	IEA	InterPro:IPR000883	F	Cytochrome c oxidase subunit 1	COI	protein	taxon:159738	20180714	InterPro
UniProtKB	Q8M192	COI		GO:0022900	GO_REF:0000108	IEA	GO:0004129	P	Cytochrome c oxidase subunit 1	COI	protein	taxon:159738	20180714	GOC
UniProtKB	Q8M192	COI		GO:0046872	GO_REF:0000038	IEA	UniProtKB-KW:KW-0479	F	Cytochrome c oxidase subunit 1	COI	protein	taxon:159738	20180714	UniProt
UniProtKB	Q8M192	COI		GO:0055114	GO_REF:0000002	IEA	InterPro:IPR000883|InterPro:IPR023616|InterPro:IPR036927	P	Cytochrome c oxidase subunit 1	COI	protein	taxon:159738	20180714	InterPro
UniProtKB	Q8M192	COI		GO:0055114	GO_REF:0000038	IEA	UniProtKB-KW:KW-0249	P	Cytochrome c oxidase subunit 1	COI	protein	taxon:159738	20180714	UniProt
UniProtKB	Q8M192	COI		GO:0055114	GO_REF:0000038	IEA	UniProtKB-KW:KW-0560	P	Cytochrome c oxidase subunit 1	COI	protein	taxon:159738	20180714	UniProt
UniProtKB	Q8M192	COI		GO:0070469	GO_REF:0000038	IEA	UniProtKB-KW:KW-0679	C	Cytochrome c oxidase subunit 1	COI	protein	taxon:159738	20180714	UniProt
UniProtKB	Q8M192	COI		GO:1902600	GO_REF:0000108	IEA	GO:0004129	P	Cytochrome c oxidase subunit 1	COI	protein	taxon:159738	20180714	GOC
UniProtKB	Q8M193	COI		GO:0004129	GO_REF:0000002	IEA	InterPro:IPR000883|InterPro:IPR023616	F	Cytochrome c oxidase subunit 1	COI	protein	taxon:159738	20180714	InterPro
UniProtKB	Q8M193	COI		GO:0004129	GO_REF:0000003	IEA	EC:1.9.3.1	F	Cytochrome c oxidase subunit 1	COI	protein	taxon:159738	20180714	UniProt
UniProtKB	Q8M193	COI		GO:0005739	GO_REF:0000038	IEA	UniProtKB-KW:KW-0496	C	Cytochrome c oxidase subunit 1	COI	protein	taxon:159738	20180714	UniProt
UniProtKB	Q8M193	COI		GO:0005743	GO_REF:0000038	IEA	UniProtKB-KW:KW-0999	C	Cytochrome c oxidase subunit 1	COI	protein	taxon:159738	20180714	UniProt
UniProtKB	Q8M193	COI		GO:0005743	GO_REF:0000040	IEA	UniProtKB-SubCell:SL-0168	C	Cytochrome c oxidase subunit 1	COI	protein	taxon:159738	20180714	UniProt
UniProtKB	Q8M193	COI		GO:0006119	GO_REF:0000041	IEA	UniPathway:UPA00705	P	Cytochrome c oxidase subunit 1	COI	protein	taxon:159738	20180714	UniProt
UniProtKB	Q8M193	COI		GO:0009060	GO_REF:0000002	IEA	InterPro:IPR000883	P	Cytochrome c oxidase subunit 1	COI	protein	taxon:159738	20180714	InterPro
UniProtKB	Q8M193	COI		GO:0016020	GO_REF:0000038	IEA	UniProtKB-KW:KW-0472	C	Cytochrome c oxidase subunit 1	COI	protein	taxon:159738	20180714	UniProt
UniProtKB	Q8M193	COI		GO:0016021	GO_REF:0000002	IEA	InterPro:IPR000883	C	Cytochrome c oxidase subunit 1	COI	protein	taxon:159738	20180714	InterPro
UniProtKB	Q8M193	COI		GO:0016021	GO_REF:0000038	IEA	UniProtKB-KW:KW-0812	C	Cytochrome c oxidase subunit 1	COI	protein	taxon:159738	20180714	UniProt
UniProtKB	Q8M193	COI		GO:0016491	GO_REF:0000038	IEA	UniProtKB-KW:KW-0560	F	Cytochrome c oxidase subunit 1	COI	protein	taxon:159738	20180714	UniProt
UniProtKB	Q8M193	COI		GO:0020037	GO_REF:0000002	IEA	InterPro:IPR000883	F	Cytochrome c oxidase subunit 1	COI	protein	taxon:159738	20180714	InterPro
UniProtKB	Q8M193	COI		GO:0022900	GO_REF:0000108	IEA	GO:0004129	P	Cytochrome c oxidase subunit 1	COI	protein	taxon:159738	20180714	GOC
UniProtKB	Q8M193	COI		GO:0046872	GO_REF:0000038	IEA	UniProtKB-KW:KW-0479	F	Cytochrome c oxidase subunit 1	COI	protein	taxon:159738	20180714	UniProt
UniProtKB	Q8M193	COI		GO:0055114	GO_REF:0000002	IEA	InterPro:IPR000883|InterPro:IPR023616|InterPro:IPR036927	P	Cytochrome c oxidase subunit 1	COI	protein	taxon:159738	20180714	InterPro
UniProtKB	Q8M193	COI		GO:0055114	GO_REF:0000038	IEA	UniProtKB-KW:KW-0249	P	Cytochrome c oxidase subunit 1	COI	protein	taxon:159738	20180714	UniProt
UniProtKB	Q8M193	COI		GO:0055114	GO_REF:0000038	IEA	UniProtKB-KW:KW-0560	P	Cytochrome c oxidase subunit 1	COI	protein	taxon:159738	20180714	UniProt
UniProtKB	Q8M193	COI		GO:0070469	GO_REF:0000038	IEA	UniProtKB-KW:KW-0679	C	Cytochrome c oxidase subunit 1	COI	protein	taxon:159738	20180714	UniProt
UniProtKB	Q8M193	COI		GO:1902600	GO_REF:0000108	IEA	GO:0004129	P	Cytochrome c oxidase subunit 1	COI	protein	taxon:159738	20180714	GOC
UniProtKB	A0A193H6H8	COI		GO:0004129	GO_REF:0000002	IEA	InterPro:IPR000883|InterPro:IPR023615|InterPro:IPR023616	F	Cytochrome c oxidase subunit 1	COI	protein	taxon:79674	20180714	InterPro	Macrobrachium rosenbergii
UniProtKB	A0A193H6H8	COI		GO:0004129	GO_REF:0000003	IEA	EC:1.9.3.1	F	Cytochrome c oxidase subunit 1	COI	protein	taxon:79674	20180714	UniProt
UniProtKB	A0A193H6H8	COI		GO:0005739	GO_REF:0000038	IEA	UniProtKB-KW:KW-0496	C	Cytochrome c oxidase subunit 1	COI	protein	taxon:79674	20180714	UniProt
UniProtKB	A0A193H6H8	COI		GO:0005743	GO_REF:0000038	IEA	UniProtKB-KW:KW-0999	C	Cytochrome c oxidase subunit 1	COI	protein	taxon:79674	20180714	UniProt
UniProtKB	A0A193H6H8	COI		GO:0005743	GO_REF:0000040	IEA	UniProtKB-SubCell:SL-0168	C	Cytochrome c oxidase subunit 1	COI	protein	taxon:79674	20180714	UniProt
UniProtKB	A0A193H6H8	COI		GO:0006119	GO_REF:0000041	IEA	UniPathway:UPA00705	P	Cytochrome c oxidase subunit 1	COI	protein	taxon:79674	20180714	UniProt
UniProtKB	A0A193H6H8	COI		GO:0009060	GO_REF:0000002	IEA	InterPro:IPR000883	P	Cytochrome c oxidase subunit 1	COI	protein	taxon:79674	20180714	InterPro
UniProtKB	A0A193H6H8	COI		GO:0016020	GO_REF:0000038	IEA	UniProtKB-KW:KW-0472	C	Cytochrome c oxidase subunit 1	COI	protein	taxon:79674	20180714	UniProt
UniProtKB	A0A193H6H8	COI		GO:0016021	GO_REF:0000002	IEA	InterPro:IPR000883	C	Cytochrome c oxidase subunit 1	COI	protein	taxon:79674	20180714	InterPro
UniProtKB	A0A193H6H8	COI		GO:0016021	GO_REF:0000038	IEA	UniProtKB-KW:KW-0812	C	Cytochrome c oxidase subunit 1	COI	protein	taxon:79674	20180714	UniProt
UniProtKB	A0A193H6H8	COI		GO:0016491	GO_REF:0000038	IEA	UniProtKB-KW:KW-0560	F	Cytochrome c oxidase subunit 1	COI	protein	taxon:79674	20180714	UniProt
UniProtKB	A0A193H6H8	COI		GO:0020037	GO_REF:0000002	IEA	InterPro:IPR000883	F	Cytochrome c oxidase subunit 1	COI	protein	taxon:79674	20180714	InterPro
UniProtKB	A0A193H6H8	COI		GO:0022900	GO_REF:0000108	IEA	GO:0004129	P	Cytochrome c oxidase subunit 1	COI	protein	taxon:79674	20180714	GOC
UniProtKB	A0A193H6H8	COI		GO:0046872	GO_REF:0000038	IEA	UniProtKB-KW:KW-0479	F	Cytochrome c oxidase subunit 1	COI	protein	taxon:79674	20180714	UniProt
UniProtKB	A0A193H6H8	COI		GO:0055114	GO_REF:0000002	IEA	InterPro:IPR000883|InterPro:IPR023615|InterPro:IPR023616|InterPro:IPR036927	P	Cytochrome c oxidase subunit 1	COI	protein	taxon:79674	20180714	InterPro
UniProtKB	A0A193H6H8	COI		GO:0055114	GO_REF:0000038	IEA	UniProtKB-KW:KW-0249	P	Cytochrome c oxidase subunit 1	COI	protein	taxon:79674	20180714	UniProt
UniProtKB	A0A193H6H8	COI		GO:0055114	GO_REF:0000038	IEA	UniProtKB-KW:KW-0560	P	Cytochrome c oxidase subunit 1	COI	protein	taxon:79674	20180714	UniProt
UniProtKB	A0A193H6H8	COI		GO:0070469	GO_REF:0000038	IEA	UniProtKB-KW:KW-0679	C	Cytochrome c oxidase subunit 1	COI	protein	taxon:79674	20180714	UniProt
UniProtKB	A0A193H6H8	COI		GO:1902600	GO_REF:0000108	IEA	GO:0004129	P	Cytochrome c oxidase subunit 1	COI	protein	taxon:79674	20180714	GOC
UniProtKB	A0A1B1MRP9	A0A1B1MRP9		GO:0008168	GO_REF:0000038	IEA	UniProtKB-KW:KW-0489	F	Farnesoic acid O-methyltransferase protein		protein	taxon:79674	20180714	UniProt
UniProtKB	A0A1B1MRP9	A0A1B1MRP9		GO:0016740	GO_REF:0000038	IEA	UniProtKB-KW:KW-0808	F	Farnesoic acid O-methyltransferase protein		protein	taxon:79674	20180714	UniProt
UniProtKB	A0A1B1MRP9	A0A1B1MRP9		GO:0032259	GO_REF:0000038	IEA	UniProtKB-KW:KW-0489	P	Farnesoic acid O-methyltransferase protein		protein	taxon:79674	20180714	UniProt
UniProtKB	A0A1B1XV96	CaMKI		GO:0000166	GO_REF:0000038	IEA	UniProtKB-KW:KW-0547	F	Calcium-calmodulin dependent protein kinase I	CaMKI	protein	taxon:79674	20180714	UniProt
UniProtKB	A0A1B1XV96	CaMKI		GO:0004672	GO_REF:0000002	IEA	InterPro:IPR000719|InterPro:IPR008271	F	Calcium-calmodulin dependent protein kinase I	CaMKI	protein	taxon:79674	20180714	InterPro
UniProtKB	A0A1B1XV96	CaMKI		GO:0004674	GO_REF:0000038	IEA	UniProtKB-KW:KW-0723	F	Calcium-calmodulin dependent protein kinase I	CaMKI	protein	taxon:79674	20180714	UniProt
UniProtKB	A0A1B1XV96	CaMKI		GO:0005524	GO_REF:0000002	IEA	InterPro:IPR000719|InterPro:IPR017441	F	Calcium-calmodulin dependent protein kinase I	CaMKI	protein	taxon:79674	20180714	InterPro
UniProtKB	A0A1B1XV96	CaMKI		GO:0005524	GO_REF:0000038	IEA	UniProtKB-KW:KW-0067	F	Calcium-calmodulin dependent protein kinase I	CaMKI	protein	taxon:79674	20180714	UniProt
UniProtKB	A0A1B1XV96	CaMKI		GO:0006468	GO_REF:0000002	IEA	InterPro:IPR000719|InterPro:IPR008271	P	Calcium-calmodulin dependent protein kinase I	CaMKI	protein	taxon:79674	20180714	InterPro
UniProtKB	A0A1B1XV96	CaMKI		GO:0016301	GO_REF:0000038	IEA	UniProtKB-KW:KW-0418	F	Calcium-calmodulin dependent protein kinase I	CaMKI	protein	taxon:79674	20180714	UniProt
UniProtKB	A0A1B1XV96	CaMKI		GO:0016310	GO_REF:0000038	IEA	UniProtKB-KW:KW-0418	P	Calcium-calmodulin dependent protein kinase I	CaMKI	protein	taxon:79674	20180714	UniProt
UniProtKB	A0A1B3LHG5	A0A1B3LHG5		GO:0030246	GO_REF:0000038	IEA	UniProtKB-KW:KW-0430	F	Lectin		protein	taxon:79674	20180714	UniProt
UniProtKB	A0A1B3LHH6	A0A1B3LHH6		GO:0007165	GO_REF:0000002	IEA	InterPro:IPR000157	P	Toll		protein	taxon:79674	20180714	InterPro
UniProtKB	A0A1B3LHH6	A0A1B3LHH6		GO:0016020	GO_REF:0000038	IEA	UniProtKB-KW:KW-0472	C	Toll		protein	taxon:79674	20180714	UniProt
UniProtKB	A0A1B3LHH6	A0A1B3LHH6		GO:0016021	GO_REF:0000038	IEA	UniProtKB-KW:KW-0812	C	Toll		protein	taxon:79674	20180714	UniProt
UniProtKB	A0A1D9C6F9	A0A1D9C6F9		GO:0003677	GO_REF:0000002	IEA	InterPro:IPR001723|InterPro:IPR024178	F	Estrogen-related receptor		protein	taxon:79674	20180714	InterPro
UniProtKB	A0A1D9C6F9	A0A1D9C6F9		GO:0003677	GO_REF:0000038	IEA	UniProtKB-KW:KW-0238	F	Estrogen-related receptor		protein	taxon:79674	20180714	UniProt
UniProtKB	A0A1D9C6F9	A0A1D9C6F9		GO:0003677	GO_REF:0000104	IEA	UniRule:UR000415707	F	Estrogen-related receptor		protein	taxon:79674	20180714	UniProt
UniProtKB	A0A1D9C6F9	A0A1D9C6F9		GO:0003700	GO_REF:0000002	IEA	InterPro:IPR001628	F	Estrogen-related receptor		protein	taxon:79674	20180714	InterPro
UniProtKB	A0A1D9C6F9	A0A1D9C6F9		GO:0003707	GO_REF:0000002	IEA	InterPro:IPR001723|InterPro:IPR024178	F	Estrogen-related receptor		protein	taxon:79674	20180714	InterPro
UniProtKB	A0A1D9C6F9	A0A1D9C6F9		GO:0005496	GO_REF:0000002	IEA	InterPro:IPR024178	F	Estrogen-related receptor		protein	taxon:79674	20180714	InterPro
UniProtKB	A0A1D9C6F9	A0A1D9C6F9		GO:0005634	GO_REF:0000002	IEA	InterPro:IPR001628|InterPro:IPR001723|InterPro:IPR024178	C	Estrogen-related receptor		protein	taxon:79674	20180714	InterPro
UniProtKB	A0A1D9C6F9	A0A1D9C6F9		GO:0005634	GO_REF:0000038	IEA	UniProtKB-KW:KW-0539	C	Estrogen-related receptor		protein	taxon:79674	20180714	UniProt
UniProtKB	A0A1D9C6F9	A0A1D9C6F9		GO:0005634	GO_REF:0000040	IEA	UniProtKB-SubCell:SL-0191	C	Estrogen-related receptor		protein	taxon:79674	20180714	UniProt
UniProtKB	A0A1D9C6F9	A0A1D9C6F9		GO:0005634	GO_REF:0000104	IEA	UniRule:UR000415707	C	Estrogen-related receptor		protein	taxon:79674	20180714	UniProt
UniProtKB	A0A1D9C6F9	A0A1D9C6F9		GO:0006351	GO_REF:0000038	IEA	UniProtKB-KW:KW-0804	P	Estrogen-related receptor		protein	taxon:79674	20180714	UniProt
UniProtKB	A0A1D9C6F9	A0A1D9C6F9		GO:0006351	GO_REF:0000104	IEA	UniRule:UR000415707	P	Estrogen-related receptor		protein	taxon:79674	20180714	UniProt
UniProtKB	A0A1D9C6F9	A0A1D9C6F9		GO:0006355	GO_REF:0000002	IEA	InterPro:IPR001628|InterPro:IPR001723|InterPro:IPR013088|InterPro:IPR024178	P	Estrogen-related receptor		protein	taxon:79674	20180714	InterPro
UniProtKB	A0A1D9C6F9	A0A1D9C6F9		GO:0006355	GO_REF:0000038	IEA	UniProtKB-KW:KW-0805	P	Estrogen-related receptor		protein	taxon:79674	20180714	UniProt
UniProtKB	A0A1D9C6F9	A0A1D9C6F9		GO:0006355	GO_REF:0000104	IEA	UniRule:UR000415707	P	Estrogen-related receptor		protein	taxon:79674	20180714	UniProt
UniProtKB	A0A1D9C6F9	A0A1D9C6F9		GO:0008270	GO_REF:0000002	IEA	InterPro:IPR001628|InterPro:IPR013088|InterPro:IPR024178	F	Estrogen-related receptor		protein	taxon:79674	20180714	InterPro
UniProtKB	A0A1D9C6F9	A0A1D9C6F9		GO:0043401	GO_REF:0000108	IEA	GO:0003707	P	Estrogen-related receptor		protein	taxon:79674	20180714	GOC
UniProtKB	A0A1D9C6F9	A0A1D9C6F9		GO:0043565	GO_REF:0000002	IEA	InterPro:IPR001628	F	Estrogen-related receptor		protein	taxon:79674	20180714	InterPro
UniProtKB	A0A1D9C6F9	A0A1D9C6F9		GO:0046872	GO_REF:0000038	IEA	UniProtKB-KW:KW-0479	F	Estrogen-related receptor		protein	taxon:79674	20180714	UniProt
UniProtKB	A0A1G4DFF0	PELI1		GO:0008063	GO_REF:0000002	IEA	InterPro:IPR006800	P	Pellino	PELI1	protein	taxon:79674	20180714	InterPro
UniProtKB	A0A1L2YXD1	A0A1L2YXD1		GO:0004129	GO_REF:0000002	IEA	InterPro:IPR000883|InterPro:IPR023616	F	Cytochrome c oxidase subunit 1		protein	taxon:79674	20180714	InterPro
UniProtKB	A0A1L2YXD1	A0A1L2YXD1		GO:0004129	GO_REF:0000003	IEA	EC:1.9.3.1	F	Cytochrome c oxidase subunit 1		protein	taxon:79674	20180714	UniProt
UniProtKB	A0A1L2YXD1	A0A1L2YXD1		GO:0005739	GO_REF:0000038	IEA	UniProtKB-KW:KW-0496	C	Cytochrome c oxidase subunit 1		protein	taxon:79674	20180714	UniProt
UniProtKB	A0A1L2YXD1	A0A1L2YXD1		GO:0005743	GO_REF:0000038	IEA	UniProtKB-KW:KW-0999	C	Cytochrome c oxidase subunit 1		protein	taxon:79674	20180714	UniProt
UniProtKB	A0A1L2YXD1	A0A1L2YXD1		GO:0005743	GO_REF:0000040	IEA	UniProtKB-SubCell:SL-0168	C	Cytochrome c oxidase subunit 1		protein	taxon:79674	20180714	UniProt
UniProtKB	A0A1L2YXD1	A0A1L2YXD1		GO:0006119	GO_REF:0000041	IEA	UniPathway:UPA00705	P	Cytochrome c oxidase subunit 1		protein	taxon:79674	20180714	UniProt
UniProtKB	A0A1L2YXD1	A0A1L2YXD1		GO:0009060	GO_REF:0000002	IEA	InterPro:IPR000883	P	Cytochrome c oxidase subunit 1		protein	taxon:79674	20180714	InterPro
UniProtKB	A0A1L2YXD1	A0A1L2YXD1		GO:0016020	GO_REF:0000038	IEA	UniProtKB-KW:KW-0472	C	Cytochrome c oxidase subunit 1		protein	taxon:79674	20180714	UniProt
UniProtKB	A0A1L2YXD1	A0A1L2YXD1		GO:0016021	GO_REF:0000002	IEA	InterPro:IPR000883	C	Cytochrome c oxidase subunit 1		protein	taxon:79674	20180714	InterPro
UniProtKB	A0A1L2YXD1	A0A1L2YXD1		GO:0016021	GO_REF:0000038	IEA	UniProtKB-KW:KW-0812	C	Cytochrome c oxidase subunit 1		protein	taxon:79674	20180714	UniProt
UniProtKB	A0A1L2YXD1	A0A1L2YXD1		GO:0016491	GO_REF:0000038	IEA	UniProtKB-KW:KW-0560	F	Cytochrome c oxidase subunit 1		protein	taxon:79674	20180714	UniProt
UniProtKB	A0A1L2YXD1	A0A1L2YXD1		GO:0020037	GO_REF:0000002	IEA	InterPro:IPR000883	F	Cytochrome c oxidase subunit 1		protein	taxon:79674	20180714	InterPro
UniProtKB	A0A1L2YXD1	A0A1L2YXD1		GO:0022900	GO_REF:0000108	IEA	GO:0004129	P	Cytochrome c oxidase subunit 1		protein	taxon:79674	20180714	GOC
UniProtKB	A0A1L2YXD1	A0A1L2YXD1		GO:0046872	GO_REF:0000038	IEA	UniProtKB-KW:KW-0479	F	Cytochrome c oxidase subunit 1		protein	taxon:79674	20180714	UniProt
UniProtKB	A0A1L2YXD1	A0A1L2YXD1		GO:0055114	GO_REF:0000002	IEA	InterPro:IPR000883|InterPro:IPR023616|InterPro:IPR036927	P	Cytochrome c oxidase subunit 1		protein	taxon:79674	20180714	InterPro
UniProtKB	A0A1L2YXD1	A0A1L2YXD1		GO:0055114	GO_REF:0000038	IEA	UniProtKB-KW:KW-0249	P	Cytochrome c oxidase subunit 1		protein	taxon:79674	20180714	UniProt
UniProtKB	A0A1L2YXD1	A0A1L2YXD1		GO:0055114	GO_REF:0000038	IEA	UniProtKB-KW:KW-0560	P	Cytochrome c oxidase subunit 1		protein	taxon:79674	20180714	UniProt
UniProtKB	A0A1L2YXD1	A0A1L2YXD1		GO:0070469	GO_REF:0000038	IEA	UniProtKB-KW:KW-0679	C	Cytochrome c oxidase subunit 1		protein	taxon:79674	20180714	UniProt
UniProtKB	A0A1L2YXD1	A0A1L2YXD1		GO:1902600	GO_REF:0000108	IEA	GO:0004129	P	Cytochrome c oxidase subunit 1		protein	taxon:79674	20180714	GOC
UniProtKB	A0A1L5YJM0	NPFI		GO:0005179	GO_REF:0000002	IEA	InterPro:IPR001955	F	Preproneuropeptide F I	NPFI	protein	taxon:79674	20180714	InterPro
UniProtKB	A0A1L5YJM0	NPFI		GO:0005576	GO_REF:0000002	IEA	InterPro:IPR001955	C	Preproneuropeptide F I	NPFI	protein	taxon:79674	20180714	InterPro
UniProtKB	A0A1L5YJM0	NPFI		GO:0007218	GO_REF:0000038	IEA	UniProtKB-KW:KW-0527	P	Preproneuropeptide F I	NPFI	protein	taxon:79674	20180714	UniProt
UniProtKB	A0A1L5YJM0	NPFI		GO:0010469	GO_REF:0000108	IEA	GO:0005179	P	Preproneuropeptide F I	NPFI	protein	taxon:79674	20180714	GOC
UniProtKB	A0A1L5YJM1	NPFII		GO:0007218	GO_REF:0000038	IEA	UniProtKB-KW:KW-0527	P	Preproneuropeptide F II	NPFII	protein	taxon:79674	20180714	UniProt
UniProtKB	A0A1M4BLS7	MSSK1		GO:0000166	GO_REF:0000038	IEA	UniProtKB-KW:KW-0547	F	Muscle-Specific Serine Kinase	MSSK1	protein	taxon:79674	20180714	UniProt
UniProtKB	A0A1M4BLS7	MSSK1		GO:0004672	GO_REF:0000002	IEA	InterPro:IPR000719|InterPro:IPR008271	F	Muscle-Specific Serine Kinase	MSSK1	protein	taxon:79674	20180714	InterPro
UniProtKB	A0A1M4BLS7	MSSK1		GO:0004674	GO_REF:0000038	IEA	UniProtKB-KW:KW-0723	F	Muscle-Specific Serine Kinase	MSSK1	protein	taxon:79674	20180714	UniProt
UniProtKB	A0A1M4BLS7	MSSK1		GO:0005524	GO_REF:0000002	IEA	InterPro:IPR000719|InterPro:IPR017441	F	Muscle-Specific Serine Kinase	MSSK1	protein	taxon:79674	20180714	InterPro
UniProtKB	A0A1M4BLS7	MSSK1		GO:0005524	GO_REF:0000038	IEA	UniProtKB-KW:KW-0067	F	Muscle-Specific Serine Kinase	MSSK1	protein	taxon:79674	20180714	UniProt
UniProtKB	A0A1M4BLS7	MSSK1		GO:0006468	GO_REF:0000002	IEA	InterPro:IPR000719|InterPro:IPR008271	P	Muscle-Specific Serine Kinase	MSSK1	protein	taxon:79674	20180714	InterPro
UniProtKB	A0A1M4BLS7	MSSK1		GO:0016301	GO_REF:0000038	IEA	UniProtKB-KW:KW-0418	F	Muscle-Specific Serine Kinase	MSSK1	protein	taxon:79674	20180714	UniProt
UniProtKB	A0A1M4BLS7	MSSK1		GO:0016310	GO_REF:0000038	IEA	UniProtKB-KW:KW-0418	P	Muscle-Specific Serine Kinase	MSSK1	protein	taxon:79674	20180714	UniProt
UniProtKB	A0A1M4BLT3	BEST1		GO:0005254	GO_REF:0000038	IEA	UniProtKB-KW:KW-0869	F	Bestrophin homolog	BEST1	protein	taxon:79674	20180714	UniProt
UniProtKB	A0A1M4BLT3	BEST1		GO:0005886	GO_REF:0000038	IEA	UniProtKB-KW:KW-1003	C	Bestrophin homolog	BEST1	protein	taxon:79674	20180714	UniProt
UniProtKB	A0A1M4BLT3	BEST1		GO:0005886	GO_REF:0000040	IEA	UniProtKB-SubCell:SL-0039	C	Bestrophin homolog	BEST1	protein	taxon:79674	20180714	UniProt
UniProtKB	A0A1M4BLT3	BEST1		GO:0006811	GO_REF:0000038	IEA	UniProtKB-KW:KW-0406	P	Bestrophin homolog	BEST1	protein	taxon:79674	20180714	UniProt
UniProtKB	A0A1M4BLT3	BEST1		GO:0006821	GO_REF:0000038	IEA	UniProtKB-KW:KW-0869	P	Bestrophin homolog	BEST1	protein	taxon:79674	20180714	UniProt
UniProtKB	A0A1M4BLT3	BEST1		GO:0016020	GO_REF:0000038	IEA	UniProtKB-KW:KW-0472	C	Bestrophin homolog	BEST1	protein	taxon:79674	20180714	UniProt
UniProtKB	A0A1M4BLT3	BEST1		GO:0016021	GO_REF:0000038	IEA	UniProtKB-KW:KW-0812	C	Bestrophin homolog	BEST1	protein	taxon:79674	20180714	UniProt
UniProtKB	A0A1M4BLT3	BEST1		GO:0034707	GO_REF:0000038	IEA	UniProtKB-KW:KW-0869	C	Bestrophin homolog	BEST1	protein	taxon:79674	20180714	UniProt
UniProtKB	A0A1M4BLT3	BEST1		GO:1902476	GO_REF:0000108	IEA	GO:0005254	P	Bestrophin homolog	BEST1	protein	taxon:79674	20180714	GOC
UniProtKB	A0A1M4BLT5	CHIT3		GO:0004553	GO_REF:0000002	IEA	InterPro:IPR001579	F	Chitinase 3	CHIT3	protein	taxon:79674	20180714	InterPro
UniProtKB	A0A1M4BLT5	CHIT3		GO:0005576	GO_REF:0000002	IEA	InterPro:IPR002557	C	Chitinase 3	CHIT3	protein	taxon:79674	20180714	InterPro
UniProtKB	A0A1M4BLT5	CHIT3		GO:0005975	GO_REF:0000002	IEA	InterPro:IPR001223|InterPro:IPR001579	P	Chitinase 3	CHIT3	protein	taxon:79674	20180714	InterPro
UniProtKB	A0A1M4BLT5	CHIT3		GO:0006030	GO_REF:0000002	IEA	InterPro:IPR002557|InterPro:IPR036508	P	Chitinase 3	CHIT3	protein	taxon:79674	20180714	InterPro
UniProtKB	A0A1M4BLT5	CHIT3		GO:0008061	GO_REF:0000002	IEA	InterPro:IPR002557|InterPro:IPR011583|InterPro:IPR036508	F	Chitinase 3	CHIT3	protein	taxon:79674	20180714	InterPro
UniProtKB	A0A1M4BLT5	CHIT3		GO:0008152	GO_REF:0000038	IEA	UniProtKB-KW:KW-0326	P	Chitinase 3	CHIT3	protein	taxon:79674	20180714	UniProt
UniProtKB	A0A1M4BLT5	CHIT3		GO:0016787	GO_REF:0000038	IEA	UniProtKB-KW:KW-0378	F	Chitinase 3	CHIT3	protein	taxon:79674	20180714	UniProt
UniProtKB	A0A1M4BLT5	CHIT3		GO:0016798	GO_REF:0000038	IEA	UniProtKB-KW:KW-0326	F	Chitinase 3	CHIT3	protein	taxon:79674	20180714	UniProt
UniProtKB	A0A1M4BLV5	CaN		GO:0004721	GO_REF:0000003	IEA	EC:3.1.3.16	F	Serine/threonine-protein phosphatase	CaN	protein	taxon:79674	20180714	UniProt
UniProtKB	A0A1M4BLV5	CaN		GO:0006470	GO_REF:0000108	IEA	GO:0004721	P	Serine/threonine-protein phosphatase	CaN	protein	taxon:79674	20180714	GOC
UniProtKB	A0A1M4BLV5	CaN		GO:0016787	GO_REF:0000002	IEA	InterPro:IPR004843|InterPro:IPR006186	F	Serine/threonine-protein phosphatase	CaN	protein	taxon:79674	20180714	InterPro
UniProtKB	A0A1M4BLV5	CaN		GO:0016787	GO_REF:0000038	IEA	UniProtKB-KW:KW-0378	F	Serine/threonine-protein phosphatase	CaN	protein	taxon:79674	20180714	UniProt
UniProtKB	A0A1U8VEE0	A0A1U8VEE0		GO:0004866	GO_REF:0000002	IEA	InterPro:IPR001599|InterPro:IPR002890	F	Alpha-2-macroglobulin		protein	taxon:79674	20180714	InterPro
UniProtKB	A0A1U8VEE0	A0A1U8VEE0		GO:0005576	GO_REF:0000002	IEA	InterPro:IPR009048|InterPro:IPR036595	C	Alpha-2-macroglobulin		protein	taxon:79674	20180714	InterPro
UniProtKB	A0A1U8VEE0	A0A1U8VEE0		GO:0005615	GO_REF:0000002	IEA	InterPro:IPR011626	C	Alpha-2-macroglobulin		protein	taxon:79674	20180714	InterPro
UniProtKB	A0A1U8VEE0	A0A1U8VEE0		GO:0010951	GO_REF:0000108	IEA	GO:0004866	P	Alpha-2-macroglobulin		protein	taxon:79674	20180714	GOC
UniProtKB	A0A1U9HYH2	Sxl		GO:0003676	GO_REF:0000002	IEA	InterPro:IPR000504|InterPro:IPR035979	F	Sex-lethal 1	Sxl	protein	taxon:79674	20180714	InterPro
UniProtKB	A0A1U9HYH2	Sxl		GO:0003723	GO_REF:0000002	IEA	InterPro:IPR002343	F	Sex-lethal 1	Sxl	protein	taxon:79674	20180714	InterPro
UniProtKB	A0A1U9HYH2	Sxl		GO:0003723	GO_REF:0000038	IEA	UniProtKB-KW:KW-0694	F	Sex-lethal 1	Sxl	protein	taxon:79674	20180714	UniProt
UniProtKB	A0A1U9HYH2	Sxl		GO:0003723	GO_REF:0000104	IEA	UniRule:UR000414619	F	Sex-lethal 1	Sxl	protein	taxon:79674	20180714	UniProt
UniProtKB	A0A1U9HZM1	Sxl		GO:0003676	GO_REF:0000002	IEA	InterPro:IPR000504|InterPro:IPR035979	F	Sex-lethal 2	Sxl	protein	taxon:79674	20180714	InterPro
UniProtKB	A0A1U9HZM1	Sxl		GO:0003723	GO_REF:0000002	IEA	InterPro:IPR002343	F	Sex-lethal 2	Sxl	protein	taxon:79674	20180714	InterPro
UniProtKB	A0A1U9HZM1	Sxl		GO:0003723	GO_REF:0000038	IEA	UniProtKB-KW:KW-0694	F	Sex-lethal 2	Sxl	protein	taxon:79674	20180714	UniProt
UniProtKB	A0A1U9HZM1	Sxl		GO:0003723	GO_REF:0000104	IEA	UniRule:UR000414619	F	Sex-lethal 2	Sxl	protein	taxon:79674	20180714	UniProt
UniProtKB	A0A1U9I0H2	Sxl		GO:0003676	GO_REF:0000002	IEA	InterPro:IPR000504|InterPro:IPR035979	F	Sex-lethal 3	Sxl	protein	taxon:79674	20180714	InterPro
UniProtKB	A0A1U9I0H2	Sxl		GO:0003723	GO_REF:0000002	IEA	InterPro:IPR002343	F	Sex-lethal 3	Sxl	protein	taxon:79674	20180714	InterPro
UniProtKB	A0A1U9I0H2	Sxl		GO:0003723	GO_REF:0000038	IEA	UniProtKB-KW:KW-0694	F	Sex-lethal 3	Sxl	protein	taxon:79674	20180714	UniProt
UniProtKB	A0A1U9I0H2	Sxl		GO:0003723	GO_REF:0000104	IEA	UniRule:UR000414619	F	Sex-lethal 3	Sxl	protein	taxon:79674	20180714	UniProt
UniProtKB	A0A1U9X5G4	COI		GO:0004129	GO_REF:0000002	IEA	InterPro:IPR000883|InterPro:IPR023616	F	Cytochrome c oxidase subunit 1	COI	protein	taxon:159736	20180714	InterPro
UniProtKB	A0A1U9X5G4	COI		GO:0004129	GO_REF:0000003	IEA	EC:1.9.3.1	F	Cytochrome c oxidase subunit 1	COI	protein	taxon:159736	20180714	UniProt
UniProtKB	A0A1U9X5G4	COI		GO:0005739	GO_REF:0000038	IEA	UniProtKB-KW:KW-0496	C	Cytochrome c oxidase subunit 1	COI	protein	taxon:159736	20180714	UniProt
UniProtKB	A0A1U9X5G4	COI		GO:0005743	GO_REF:0000038	IEA	UniProtKB-KW:KW-0999	C	Cytochrome c oxidase subunit 1	COI	protein	taxon:159736	20180714	UniProt
UniProtKB	A0A1U9X5G4	COI		GO:0005743	GO_REF:0000040	IEA	UniProtKB-SubCell:SL-0168	C	Cytochrome c oxidase subunit 1	COI	protein	taxon:159736	20180714	UniProt
UniProtKB	A0A1U9X5G4	COI		GO:0006119	GO_REF:0000041	IEA	UniPathway:UPA00705	P	Cytochrome c oxidase subunit 1	COI	protein	taxon:159736	20180714	UniProt
UniProtKB	A0A1U9X5G4	COI		GO:0009060	GO_REF:0000002	IEA	InterPro:IPR000883	P	Cytochrome c oxidase subunit 1	COI	protein	taxon:159736	20180714	InterPro
UniProtKB	A0A1U9X5G4	COI		GO:0016020	GO_REF:0000038	IEA	UniProtKB-KW:KW-0472	C	Cytochrome c oxidase subunit 1	COI	protein	taxon:159736	20180714	UniProt
UniProtKB	A0A1U9X5G4	COI		GO:0016021	GO_REF:0000002	IEA	InterPro:IPR000883	C	Cytochrome c oxidase subunit 1	COI	protein	taxon:159736	20180714	InterPro
UniProtKB	A0A1U9X5G4	COI		GO:0016021	GO_REF:0000038	IEA	UniProtKB-KW:KW-0812	C	Cytochrome c oxidase subunit 1	COI	protein	taxon:159736	20180714	UniProt
UniProtKB	A0A1U9X5G4	COI		GO:0016491	GO_REF:0000038	IEA	UniProtKB-KW:KW-0560	F	Cytochrome c oxidase subunit 1	COI	protein	taxon:159736	20180714	UniProt
UniProtKB	A0A1U9X5G4	COI		GO:0020037	GO_REF:0000002	IEA	InterPro:IPR000883	F	Cytochrome c oxidase subunit 1	COI	protein	taxon:159736	20180714	InterPro
UniProtKB	A0A1U9X5G4	COI		GO:0022900	GO_REF:0000108	IEA	GO:0004129	P	Cytochrome c oxidase subunit 1	COI	protein	taxon:159736	20180714	GOC
UniProtKB	A0A1U9X5G4	COI		GO:0046872	GO_REF:0000038	IEA	UniProtKB-KW:KW-0479	F	Cytochrome c oxidase subunit 1	COI	protein	taxon:159736	20180714	UniProt
UniProtKB	A0A1U9X5G4	COI		GO:0055114	GO_REF:0000002	IEA	InterPro:IPR000883|InterPro:IPR023616|InterPro:IPR036927	P	Cytochrome c oxidase subunit 1	COI	protein	taxon:159736	20180714	InterPro
UniProtKB	A0A1U9X5G4	COI		GO:0055114	GO_REF:0000038	IEA	UniProtKB-KW:KW-0249	P	Cytochrome c oxidase subunit 1	COI	protein	taxon:159736	20180714	UniProt
UniProtKB	A0A1U9X5G4	COI		GO:0055114	GO_REF:0000038	IEA	UniProtKB-KW:KW-0560	P	Cytochrome c oxidase subunit 1	COI	protein	taxon:159736	20180714	UniProt
UniProtKB	A0A1U9X5G4	COI		GO:0070469	GO_REF:0000038	IEA	UniProtKB-KW:KW-0679	C	Cytochrome c oxidase subunit 1	COI	protein	taxon:159736	20180714	UniProt
UniProtKB	A0A1U9X5G4	COI		GO:1902600	GO_REF:0000108	IEA	GO:0004129	P	Cytochrome c oxidase subunit 1	COI	protein	taxon:159736	20180714	GOC
UniProtKB	A0A1U9X5I5	COI		GO:0004129	GO_REF:0000002	IEA	InterPro:IPR000883|InterPro:IPR023616	F	Cytochrome c oxidase subunit 1	COI	protein	taxon:159736	20180714	InterPro
UniProtKB	A0A1U9X5I5	COI		GO:0004129	GO_REF:0000003	IEA	EC:1.9.3.1	F	Cytochrome c oxidase subunit 1	COI	protein	taxon:159736	20180714	UniProt
UniProtKB	A0A1U9X5I5	COI		GO:0005739	GO_REF:0000038	IEA	UniProtKB-KW:KW-0496	C	Cytochrome c oxidase subunit 1	COI	protein	taxon:159736	20180714	UniProt
UniProtKB	A0A1U9X5I5	COI		GO:0005743	GO_REF:0000038	IEA	UniProtKB-KW:KW-0999	C	Cytochrome c oxidase subunit 1	COI	protein	taxon:159736	20180714	UniProt
UniProtKB	A0A1U9X5I5	COI		GO:0005743	GO_REF:0000040	IEA	UniProtKB-SubCell:SL-0168	C	Cytochrome c oxidase subunit 1	COI	protein	taxon:159736	20180714	UniProt
UniProtKB	A0A1U9X5I5	COI		GO:0006119	GO_REF:0000041	IEA	UniPathway:UPA00705	P	Cytochrome c oxidase subunit 1	COI	protein	taxon:159736	20180714	UniProt
UniProtKB	A0A1U9X5I5	COI		GO:0009060	GO_REF:0000002	IEA	InterPro:IPR000883	P	Cytochrome c oxidase subunit 1	COI	protein	taxon:159736	20180714	InterPro
UniProtKB	A0A1U9X5I5	COI		GO:0016020	GO_REF:0000038	IEA	UniProtKB-KW:KW-0472	C	Cytochrome c oxidase subunit 1	COI	protein	taxon:159736	20180714	UniProt
UniProtKB	A0A1U9X5I5	COI		GO:0016021	GO_REF:0000002	IEA	InterPro:IPR000883	C	Cytochrome c oxidase subunit 1	COI	protein	taxon:159736	20180714	InterPro
UniProtKB	A0A1U9X5I5	COI		GO:0016021	GO_REF:0000038	IEA	UniProtKB-KW:KW-0812	C	Cytochrome c oxidase subunit 1	COI	protein	taxon:159736	20180714	UniProt
UniProtKB	A0A1U9X5I5	COI		GO:0016491	GO_REF:0000038	IEA	UniProtKB-KW:KW-0560	F	Cytochrome c oxidase subunit 1	COI	protein	taxon:159736	20180714	UniProt
UniProtKB	A0A1U9X5I5	COI		GO:0020037	GO_REF:0000002	IEA	InterPro:IPR000883	F	Cytochrome c oxidase subunit 1	COI	protein	taxon:159736	20180714	InterPro
UniProtKB	A0A1U9X5I5	COI		GO:0022900	GO_REF:0000108	IEA	GO:0004129	P	Cytochrome c oxidase subunit 1	COI	protein	taxon:159736	20180714	GOC
UniProtKB	A0A1U9X5I5	COI		GO:0046872	GO_REF:0000038	IEA	UniProtKB-KW:KW-0479	F	Cytochrome c oxidase subunit 1	COI	protein	taxon:159736	20180714	UniProt
UniProtKB	A0A1U9X5I5	COI		GO:0055114	GO_REF:0000002	IEA	InterPro:IPR000883|InterPro:IPR023616|InterPro:IPR036927	P	Cytochrome c oxidase subunit 1	COI	protein	taxon:159736	20180714	InterPro
UniProtKB	A0A1U9X5I5	COI		GO:0055114	GO_REF:0000038	IEA	UniProtKB-KW:KW-0249	P	Cytochrome c oxidase subunit 1	COI	protein	taxon:159736	20180714	UniProt
UniProtKB	A0A1U9X5I5	COI		GO:0055114	GO_REF:0000038	IEA	UniProtKB-KW:KW-0560	P	Cytochrome c oxidase subunit 1	COI	protein	taxon:159736	20180714	UniProt
UniProtKB	A0A1U9X5I5	COI		GO:0070469	GO_REF:0000038	IEA	UniProtKB-KW:KW-0679	C	Cytochrome c oxidase subunit 1	COI	protein	taxon:159736	20180714	UniProt
UniProtKB	A0A1U9X5I5	COI		GO:1902600	GO_REF:0000108	IEA	GO:0004129	P	Cytochrome c oxidase subunit 1	COI	protein	taxon:159736	20180714	GOC
UniProtKB	A0A1U9X5L2	COI		GO:0004129	GO_REF:0000002	IEA	InterPro:IPR000883|InterPro:IPR023616	F	Cytochrome c oxidase subunit 1	COI	protein	taxon:159736	20180714	InterPro
UniProtKB	A0A1U9X5L2	COI		GO:0004129	GO_REF:0000003	IEA	EC:1.9.3.1	F	Cytochrome c oxidase subunit 1	COI	protein	taxon:159736	20180714	UniProt
UniProtKB	A0A1U9X5L2	COI		GO:0005739	GO_REF:0000038	IEA	UniProtKB-KW:KW-0496	C	Cytochrome c oxidase subunit 1	COI	protein	taxon:159736	20180714	UniProt
UniProtKB	A0A1U9X5L2	COI		GO:0005743	GO_REF:0000038	IEA	UniProtKB-KW:KW-0999	C	Cytochrome c oxidase subunit 1	COI	protein	taxon:159736	20180714	UniProt
UniProtKB	A0A1U9X5L2	COI		GO:0005743	GO_REF:0000040	IEA	UniProtKB-SubCell:SL-0168	C	Cytochrome c oxidase subunit 1	COI	protein	taxon:159736	20180714	UniProt
UniProtKB	A0A1U9X5L2	COI		GO:0006119	GO_REF:0000041	IEA	UniPathway:UPA00705	P	Cytochrome c oxidase subunit 1	COI	protein	taxon:159736	20180714	UniProt
UniProtKB	A0A1U9X5L2	COI		GO:0009060	GO_REF:0000002	IEA	InterPro:IPR000883	P	Cytochrome c oxidase subunit 1	COI	protein	taxon:159736	20180714	InterPro
UniProtKB	A0A1U9X5L2	COI		GO:0016020	GO_REF:0000038	IEA	UniProtKB-KW:KW-0472	C	Cytochrome c oxidase subunit 1	COI	protein	taxon:159736	20180714	UniProt
UniProtKB	A0A1U9X5L2	COI		GO:0016021	GO_REF:0000002	IEA	InterPro:IPR000883	C	Cytochrome c oxidase subunit 1	COI	protein	taxon:159736	20180714	InterPro
UniProtKB	A0A1U9X5L2	COI		GO:0016021	GO_REF:0000038	IEA	UniProtKB-KW:KW-0812	C	Cytochrome c oxidase subunit 1	COI	protein	taxon:159736	20180714	UniProt
UniProtKB	A0A1U9X5L2	COI		GO:0016491	GO_REF:0000038	IEA	UniProtKB-KW:KW-0560	F	Cytochrome c oxidase subunit 1	COI	protein	taxon:159736	20180714	UniProt
UniProtKB	A0A1U9X5L2	COI		GO:0020037	GO_REF:0000002	IEA	InterPro:IPR000883	F	Cytochrome c oxidase subunit 1	COI	protein	taxon:159736	20180714	InterPro
UniProtKB	A0A1U9X5L2	COI		GO:0022900	GO_REF:0000108	IEA	GO:0004129	P	Cytochrome c oxidase subunit 1	COI	protein	taxon:159736	20180714	GOC
UniProtKB	A0A1U9X5L2	COI		GO:0046872	GO_REF:0000038	IEA	UniProtKB-KW:KW-0479	F	Cytochrome c oxidase subunit 1	COI	protein	taxon:159736	20180714	UniProt
UniProtKB	A0A1U9X5L2	COI		GO:0055114	GO_REF:0000002	IEA	InterPro:IPR000883|InterPro:IPR023616|InterPro:IPR036927	P	Cytochrome c oxidase subunit 1	COI	protein	taxon:159736	20180714	InterPro
UniProtKB	A0A1U9X5L2	COI		GO:0055114	GO_REF:0000038	IEA	UniProtKB-KW:KW-0249	P	Cytochrome c oxidase subunit 1	COI	protein	taxon:159736	20180714	UniProt
UniProtKB	A0A1U9X5L2	COI		GO:0055114	GO_REF:0000038	IEA	UniProtKB-KW:KW-0560	P	Cytochrome c oxidase subunit 1	COI	protein	taxon:159736	20180714	UniProt
UniProtKB	A0A1U9X5L2	COI		GO:0070469	GO_REF:0000038	IEA	UniProtKB-KW:KW-0679	C	Cytochrome c oxidase subunit 1	COI	protein	taxon:159736	20180714	UniProt
UniProtKB	A0A1U9X5L2	COI		GO:1902600	GO_REF:0000108	IEA	GO:0004129	P	Cytochrome c oxidase subunit 1	COI	protein	taxon:159736	20180714	GOC
UniProtKB	A0A1U9X5Q1	COI		GO:0004129	GO_REF:0000002	IEA	InterPro:IPR000883|InterPro:IPR023616	F	Cytochrome c oxidase subunit 1	COI	protein	taxon:159736	20180714	InterPro
UniProtKB	A0A1U9X5Q1	COI		GO:0004129	GO_REF:0000003	IEA	EC:1.9.3.1	F	Cytochrome c oxidase subunit 1	COI	protein	taxon:159736	20180714	UniProt
UniProtKB	A0A1U9X5Q1	COI		GO:0005739	GO_REF:0000038	IEA	UniProtKB-KW:KW-0496	C	Cytochrome c oxidase subunit 1	COI	protein	taxon:159736	20180714	UniProt
UniProtKB	A0A1U9X5Q1	COI		GO:0005743	GO_REF:0000038	IEA	UniProtKB-KW:KW-0999	C	Cytochrome c oxidase subunit 1	COI	protein	taxon:159736	20180714	UniProt
UniProtKB	A0A1U9X5Q1	COI		GO:0005743	GO_REF:0000040	IEA	UniProtKB-SubCell:SL-0168	C	Cytochrome c oxidase subunit 1	COI	protein	taxon:159736	20180714	UniProt
UniProtKB	A0A1U9X5Q1	COI		GO:0006119	GO_REF:0000041	IEA	UniPathway:UPA00705	P	Cytochrome c oxidase subunit 1	COI	protein	taxon:159736	20180714	UniProt
UniProtKB	A0A1U9X5Q1	COI		GO:0009060	GO_REF:0000002	IEA	InterPro:IPR000883	P	Cytochrome c oxidase subunit 1	COI	protein	taxon:159736	20180714	InterPro
UniProtKB	A0A1U9X5Q1	COI		GO:0016020	GO_REF:0000038	IEA	UniProtKB-KW:KW-0472	C	Cytochrome c oxidase subunit 1	COI	protein	taxon:159736	20180714	UniProt
UniProtKB	A0A1U9X5Q1	COI		GO:0016021	GO_REF:0000002	IEA	InterPro:IPR000883	C	Cytochrome c oxidase subunit 1	COI	protein	taxon:159736	20180714	InterPro
UniProtKB	A0A1U9X5Q1	COI		GO:0016021	GO_REF:0000038	IEA	UniProtKB-KW:KW-0812	C	Cytochrome c oxidase subunit 1	COI	protein	taxon:159736	20180714	UniProt
UniProtKB	A0A1U9X5Q1	COI		GO:0016491	GO_REF:0000038	IEA	UniProtKB-KW:KW-0560	F	Cytochrome c oxidase subunit 1	COI	protein	taxon:159736	20180714	UniProt
UniProtKB	A0A1U9X5Q1	COI		GO:0020037	GO_REF:0000002	IEA	InterPro:IPR000883	F	Cytochrome c oxidase subunit 1	COI	protein	taxon:159736	20180714	InterPro
UniProtKB	A0A1U9X5Q1	COI		GO:0022900	GO_REF:0000108	IEA	GO:0004129	P	Cytochrome c oxidase subunit 1	COI	protein	taxon:159736	20180714	GOC
UniProtKB	A0A1U9X5Q1	COI		GO:0046872	GO_REF:0000038	IEA	UniProtKB-KW:KW-0479	F	Cytochrome c oxidase subunit 1	COI	protein	taxon:159736	20180714	UniProt
UniProtKB	A0A1U9X5Q1	COI		GO:0055114	GO_REF:0000002	IEA	InterPro:IPR000883|InterPro:IPR023616|InterPro:IPR036927	P	Cytochrome c oxidase subunit 1	COI	protein	taxon:159736	20180714	InterPro
UniProtKB	A0A1U9X5Q1	COI		GO:0055114	GO_REF:0000038	IEA	UniProtKB-KW:KW-0249	P	Cytochrome c oxidase subunit 1	COI	protein	taxon:159736	20180714	UniProt
UniProtKB	A0A1U9X5Q1	COI		GO:0055114	GO_REF:0000038	IEA	UniProtKB-KW:KW-0560	P	Cytochrome c oxidase subunit 1	COI	protein	taxon:159736	20180714	UniProt
UniProtKB	A0A1U9X5Q1	COI		GO:0070469	GO_REF:0000038	IEA	UniProtKB-KW:KW-0679	C	Cytochrome c oxidase subunit 1	COI	protein	taxon:159736	20180714	UniProt
UniProtKB	A0A1U9X5Q1	COI		GO:1902600	GO_REF:0000108	IEA	GO:0004129	P	Cytochrome c oxidase subunit 1	COI	protein	taxon:159736	20180714	GOC
UniProtKB	A0A1U9X5Q7	COI		GO:0004129	GO_REF:0000002	IEA	InterPro:IPR000883|InterPro:IPR023616	F	Cytochrome c oxidase subunit 1	COI	protein	taxon:159736	20180714	InterPro
UniProtKB	A0A1U9X5Q7	COI		GO:0004129	GO_REF:0000003	IEA	EC:1.9.3.1	F	Cytochrome c oxidase subunit 1	COI	protein	taxon:159736	20180714	UniProt
UniProtKB	A0A1U9X5Q7	COI		GO:0005739	GO_REF:0000038	IEA	UniProtKB-KW:KW-0496	C	Cytochrome c oxidase subunit 1	COI	protein	taxon:159736	20180714	UniProt
UniProtKB	A0A1U9X5Q7	COI		GO:0005743	GO_REF:0000038	IEA	UniProtKB-KW:KW-0999	C	Cytochrome c oxidase subunit 1	COI	protein	taxon:159736	20180714	UniProt
UniProtKB	A0A1U9X5Q7	COI		GO:0005743	GO_REF:0000040	IEA	UniProtKB-SubCell:SL-0168	C	Cytochrome c oxidase subunit 1	COI	protein	taxon:159736	20180714	UniProt
UniProtKB	A0A1U9X5Q7	COI		GO:0006119	GO_REF:0000041	IEA	UniPathway:UPA00705	P	Cytochrome c oxidase subunit 1	COI	protein	taxon:159736	20180714	UniProt
UniProtKB	A0A1U9X5Q7	COI		GO:0009060	GO_REF:0000002	IEA	InterPro:IPR000883	P	Cytochrome c oxidase subunit 1	COI	protein	taxon:159736	20180714	InterPro
UniProtKB	A0A1U9X5Q7	COI		GO:0016020	GO_REF:0000038	IEA	UniProtKB-KW:KW-0472	C	Cytochrome c oxidase subunit 1	COI	protein	taxon:159736	20180714	UniProt
UniProtKB	A0A1U9X5Q7	COI		GO:0016021	GO_REF:0000002	IEA	InterPro:IPR000883	C	Cytochrome c oxidase subunit 1	COI	protein	taxon:159736	20180714	InterPro
UniProtKB	A0A1U9X5Q7	COI		GO:0016021	GO_REF:0000038	IEA	UniProtKB-KW:KW-0812	C	Cytochrome c oxidase subunit 1	COI	protein	taxon:159736	20180714	UniProt
UniProtKB	A0A1U9X5Q7	COI		GO:0016491	GO_REF:0000038	IEA	UniProtKB-KW:KW-0560	F	Cytochrome c oxidase subunit 1	COI	protein	taxon:159736	20180714	UniProt
UniProtKB	A0A1U9X5Q7	COI		GO:0020037	GO_REF:0000002	IEA	InterPro:IPR000883	F	Cytochrome c oxidase subunit 1	COI	protein	taxon:159736	20180714	InterPro
UniProtKB	A0A1U9X5Q7	COI		GO:0022900	GO_REF:0000108	IEA	GO:0004129	P	Cytochrome c oxidase subunit 1	COI	protein	taxon:159736	20180714	GOC
UniProtKB	A0A1U9X5Q7	COI		GO:0046872	GO_REF:0000038	IEA	UniProtKB-KW:KW-0479	F	Cytochrome c oxidase subunit 1	COI	protein	taxon:159736	20180714	UniProt
UniProtKB	A0A1U9X5Q7	COI		GO:0055114	GO_REF:0000002	IEA	InterPro:IPR000883|InterPro:IPR023616|InterPro:IPR036927	P	Cytochrome c oxidase subunit 1	COI	protein	taxon:159736	20180714	InterPro
UniProtKB	A0A1U9X5Q7	COI		GO:0055114	GO_REF:0000038	IEA	UniProtKB-KW:KW-0249	P	Cytochrome c oxidase subunit 1	COI	protein	taxon:159736	20180714	UniProt
UniProtKB	A0A1U9X5Q7	COI		GO:0055114	GO_REF:0000038	IEA	UniProtKB-KW:KW-0560	P	Cytochrome c oxidase subunit 1	COI	protein	taxon:159736	20180714	UniProt
UniProtKB	A0A1U9X5Q7	COI		GO:0070469	GO_REF:0000038	IEA	UniProtKB-KW:KW-0679	C	Cytochrome c oxidase subunit 1	COI	protein	taxon:159736	20180714	UniProt
UniProtKB	A0A1U9X5Q7	COI		GO:1902600	GO_REF:0000108	IEA	GO:0004129	P	Cytochrome c oxidase subunit 1	COI	protein	taxon:159736	20180714	GOC
UniProtKB	A0A1U9X5S3	COI		GO:0004129	GO_REF:0000002	IEA	InterPro:IPR000883|InterPro:IPR023616	F	Cytochrome c oxidase subunit 1	COI	protein	taxon:159736	20180714	InterPro
UniProtKB	A0A1U9X5S3	COI		GO:0004129	GO_REF:0000003	IEA	EC:1.9.3.1	F	Cytochrome c oxidase subunit 1	COI	protein	taxon:159736	20180714	UniProt
UniProtKB	A0A1U9X5S3	COI		GO:0005739	GO_REF:0000038	IEA	UniProtKB-KW:KW-0496	C	Cytochrome c oxidase subunit 1	COI	protein	taxon:159736	20180714	UniProt
UniProtKB	A0A1U9X5S3	COI		GO:0005743	GO_REF:0000038	IEA	UniProtKB-KW:KW-0999	C	Cytochrome c oxidase subunit 1	COI	protein	taxon:159736	20180714	UniProt
UniProtKB	A0A1U9X5S3	COI		GO:0005743	GO_REF:0000040	IEA	UniProtKB-SubCell:SL-0168	C	Cytochrome c oxidase subunit 1	COI	protein	taxon:159736	20180714	UniProt
UniProtKB	A0A1U9X5S3	COI		GO:0006119	GO_REF:0000041	IEA	UniPathway:UPA00705	P	Cytochrome c oxidase subunit 1	COI	protein	taxon:159736	20180714	UniProt
UniProtKB	A0A1U9X5S3	COI		GO:0009060	GO_REF:0000002	IEA	InterPro:IPR000883	P	Cytochrome c oxidase subunit 1	COI	protein	taxon:159736	20180714	InterPro
UniProtKB	A0A1U9X5S3	COI		GO:0016020	GO_REF:0000038	IEA	UniProtKB-KW:KW-0472	C	Cytochrome c oxidase subunit 1	COI	protein	taxon:159736	20180714	UniProt
UniProtKB	A0A1U9X5S3	COI		GO:0016021	GO_REF:0000002	IEA	InterPro:IPR000883	C	Cytochrome c oxidase subunit 1	COI	protein	taxon:159736	20180714	InterPro
UniProtKB	A0A1U9X5S3	COI		GO:0016021	GO_REF:0000038	IEA	UniProtKB-KW:KW-0812	C	Cytochrome c oxidase subunit 1	COI	protein	taxon:159736	20180714	UniProt
UniProtKB	A0A1U9X5S3	COI		GO:0016491	GO_REF:0000038	IEA	UniProtKB-KW:KW-0560	F	Cytochrome c oxidase subunit 1	COI	protein	taxon:159736	20180714	UniProt
UniProtKB	A0A1U9X5S3	COI		GO:0020037	GO_REF:0000002	IEA	InterPro:IPR000883	F	Cytochrome c oxidase subunit 1	COI	protein	taxon:159736	20180714	InterPro
UniProtKB	A0A1U9X5S3	COI		GO:0022900	GO_REF:0000108	IEA	GO:0004129	P	Cytochrome c oxidase subunit 1	COI	protein	taxon:159736	20180714	GOC
UniProtKB	A0A1U9X5S3	COI		GO:0046872	GO_REF:0000038	IEA	UniProtKB-KW:KW-0479	F	Cytochrome c oxidase subunit 1	COI	protein	taxon:159736	20180714	UniProt
UniProtKB	A0A1U9X5S3	COI		GO:0055114	GO_REF:0000002	IEA	InterPro:IPR000883|InterPro:IPR023616|InterPro:IPR036927	P	Cytochrome c oxidase subunit 1	COI	protein	taxon:159736	20180714	InterPro
UniProtKB	A0A1U9X5S3	COI		GO:0055114	GO_REF:0000038	IEA	UniProtKB-KW:KW-0249	P	Cytochrome c oxidase subunit 1	COI	protein	taxon:159736	20180714	UniProt
UniProtKB	A0A1U9X5S3	COI		GO:0055114	GO_REF:0000038	IEA	UniProtKB-KW:KW-0560	P	Cytochrome c oxidase subunit 1	COI	protein	taxon:159736	20180714	UniProt
UniProtKB	A0A1U9X5S3	COI		GO:0070469	GO_REF:0000038	IEA	UniProtKB-KW:KW-0679	C	Cytochrome c oxidase subunit 1	COI	protein	taxon:159736	20180714	UniProt
UniProtKB	A0A1U9X5S3	COI		GO:1902600	GO_REF:0000108	IEA	GO:0004129	P	Cytochrome c oxidase subunit 1	COI	protein	taxon:159736	20180714	GOC
UniProtKB	A0A1U9X5T7	COI		GO:0004129	GO_REF:0000002	IEA	InterPro:IPR000883|InterPro:IPR023616	F	Cytochrome c oxidase subunit 1	COI	protein	taxon:159736	20180714	InterPro
UniProtKB	A0A1U9X5T7	COI		GO:0004129	GO_REF:0000003	IEA	EC:1.9.3.1	F	Cytochrome c oxidase subunit 1	COI	protein	taxon:159736	20180714	UniProt
UniProtKB	A0A1U9X5T7	COI		GO:0005739	GO_REF:0000038	IEA	UniProtKB-KW:KW-0496	C	Cytochrome c oxidase subunit 1	COI	protein	taxon:159736	20180714	UniProt
UniProtKB	A0A1U9X5T7	COI		GO:0005743	GO_REF:0000038	IEA	UniProtKB-KW:KW-0999	C	Cytochrome c oxidase subunit 1	COI	protein	taxon:159736	20180714	UniProt
UniProtKB	A0A1U9X5T7	COI		GO:0005743	GO_REF:0000040	IEA	UniProtKB-SubCell:SL-0168	C	Cytochrome c oxidase subunit 1	COI	protein	taxon:159736	20180714	UniProt
UniProtKB	A0A1U9X5T7	COI		GO:0006119	GO_REF:0000041	IEA	UniPathway:UPA00705	P	Cytochrome c oxidase subunit 1	COI	protein	taxon:159736	20180714	UniProt
UniProtKB	A0A1U9X5T7	COI		GO:0009060	GO_REF:0000002	IEA	InterPro:IPR000883	P	Cytochrome c oxidase subunit 1	COI	protein	taxon:159736	20180714	InterPro
UniProtKB	A0A1U9X5T7	COI		GO:0016020	GO_REF:0000038	IEA	UniProtKB-KW:KW-0472	C	Cytochrome c oxidase subunit 1	COI	protein	taxon:159736	20180714	UniProt
UniProtKB	A0A1U9X5T7	COI		GO:0016021	GO_REF:0000002	IEA	InterPro:IPR000883	C	Cytochrome c oxidase subunit 1	COI	protein	taxon:159736	20180714	InterPro
UniProtKB	A0A1U9X5T7	COI		GO:0016021	GO_REF:0000038	IEA	UniProtKB-KW:KW-0812	C	Cytochrome c oxidase subunit 1	COI	protein	taxon:159736	20180714	UniProt
UniProtKB	A0A1U9X5T7	COI		GO:0016491	GO_REF:0000038	IEA	UniProtKB-KW:KW-0560	F	Cytochrome c oxidase subunit 1	COI	protein	taxon:159736	20180714	UniProt
UniProtKB	A0A1U9X5T7	COI		GO:0020037	GO_REF:0000002	IEA	InterPro:IPR000883	F	Cytochrome c oxidase subunit 1	COI	protein	taxon:159736	20180714	InterPro
UniProtKB	A0A1U9X5T7	COI		GO:0022900	GO_REF:0000108	IEA	GO:0004129	P	Cytochrome c oxidase subunit 1	COI	protein	taxon:159736	20180714	GOC
UniProtKB	A0A1U9X5T7	COI		GO:0046872	GO_REF:0000038	IEA	UniProtKB-KW:KW-0479	F	Cytochrome c oxidase subunit 1	COI	protein	taxon:159736	20180714	UniProt
UniProtKB	A0A1U9X5T7	COI		GO:0055114	GO_REF:0000002	IEA	InterPro:IPR000883|InterPro:IPR023616|InterPro:IPR036927	P	Cytochrome c oxidase subunit 1	COI	protein	taxon:159736	20180714	InterPro
UniProtKB	A0A1U9X5T7	COI		GO:0055114	GO_REF:0000038	IEA	UniProtKB-KW:KW-0249	P	Cytochrome c oxidase subunit 1	COI	protein	taxon:159736	20180714	UniProt
UniProtKB	A0A1U9X5T7	COI		GO:0055114	GO_REF:0000038	IEA	UniProtKB-KW:KW-0560	P	Cytochrome c oxidase subunit 1	COI	protein	taxon:159736	20180714	UniProt
UniProtKB	A0A1U9X5T7	COI		GO:0070469	GO_REF:0000038	IEA	UniProtKB-KW:KW-0679	C	Cytochrome c oxidase subunit 1	COI	protein	taxon:159736	20180714	UniProt
UniProtKB	A0A1U9X5T7	COI		GO:1902600	GO_REF:0000108	IEA	GO:0004129	P	Cytochrome c oxidase subunit 1	COI	protein	taxon:159736	20180714	GOC
UniProtKB	A0A1U9X5T9	COI		GO:0004129	GO_REF:0000002	IEA	InterPro:IPR000883|InterPro:IPR023616	F	Cytochrome c oxidase subunit 1	COI	protein	taxon:159736	20180714	InterPro
UniProtKB	A0A1U9X5T9	COI		GO:0004129	GO_REF:0000003	IEA	EC:1.9.3.1	F	Cytochrome c oxidase subunit 1	COI	protein	taxon:159736	20180714	UniProt
UniProtKB	A0A1U9X5T9	COI		GO:0005739	GO_REF:0000038	IEA	UniProtKB-KW:KW-0496	C	Cytochrome c oxidase subunit 1	COI	protein	taxon:159736	20180714	UniProt
UniProtKB	A0A1U9X5T9	COI		GO:0005743	GO_REF:0000038	IEA	UniProtKB-KW:KW-0999	C	Cytochrome c oxidase subunit 1	COI	protein	taxon:159736	20180714	UniProt
UniProtKB	A0A1U9X5T9	COI		GO:0005743	GO_REF:0000040	IEA	UniProtKB-SubCell:SL-0168	C	Cytochrome c oxidase subunit 1	COI	protein	taxon:159736	20180714	UniProt
UniProtKB	A0A1U9X5T9	COI		GO:0006119	GO_REF:0000041	IEA	UniPathway:UPA00705	P	Cytochrome c oxidase subunit 1	COI	protein	taxon:159736	20180714	UniProt
UniProtKB	A0A1U9X5T9	COI		GO:0009060	GO_REF:0000002	IEA	InterPro:IPR000883	P	Cytochrome c oxidase subunit 1	COI	protein	taxon:159736	20180714	InterPro
UniProtKB	A0A1U9X5T9	COI		GO:0016020	GO_REF:0000038	IEA	UniProtKB-KW:KW-0472	C	Cytochrome c oxidase subunit 1	COI	protein	taxon:159736	20180714	UniProt
UniProtKB	A0A1U9X5T9	COI		GO:0016021	GO_REF:0000002	IEA	InterPro:IPR000883	C	Cytochrome c oxidase subunit 1	COI	protein	taxon:159736	20180714	InterPro
UniProtKB	A0A1U9X5T9	COI		GO:0016021	GO_REF:0000038	IEA	UniProtKB-KW:KW-0812	C	Cytochrome c oxidase subunit 1	COI	protein	taxon:159736	20180714	UniProt
UniProtKB	A0A1U9X5T9	COI		GO:0016491	GO_REF:0000038	IEA	UniProtKB-KW:KW-0560	F	Cytochrome c oxidase subunit 1	COI	protein	taxon:159736	20180714	UniProt
UniProtKB	A0A1U9X5T9	COI		GO:0020037	GO_REF:0000002	IEA	InterPro:IPR000883	F	Cytochrome c oxidase subunit 1	COI	protein	taxon:159736	20180714	InterPro
UniProtKB	A0A1U9X5T9	COI		GO:0022900	GO_REF:0000108	IEA	GO:0004129	P	Cytochrome c oxidase subunit 1	COI	protein	taxon:159736	20180714	GOC
UniProtKB	A0A1U9X5T9	COI		GO:0046872	GO_REF:0000038	IEA	UniProtKB-KW:KW-0479	F	Cytochrome c oxidase subunit 1	COI	protein	taxon:159736	20180714	UniProt
UniProtKB	A0A1U9X5T9	COI		GO:0055114	GO_REF:0000002	IEA	InterPro:IPR000883|InterPro:IPR023616|InterPro:IPR036927	P	Cytochrome c oxidase subunit 1	COI	protein	taxon:159736	20180714	InterPro
UniProtKB	A0A1U9X5T9	COI		GO:0055114	GO_REF:0000038	IEA	UniProtKB-KW:KW-0249	P	Cytochrome c oxidase subunit 1	COI	protein	taxon:159736	20180714	UniProt
UniProtKB	A0A1U9X5T9	COI		GO:0055114	GO_REF:0000038	IEA	UniProtKB-KW:KW-0560	P	Cytochrome c oxidase subunit 1	COI	protein	taxon:159736	20180714	UniProt
UniProtKB	A0A1U9X5T9	COI		GO:0070469	GO_REF:0000038	IEA	UniProtKB-KW:KW-0679	C	Cytochrome c oxidase subunit 1	COI	protein	taxon:159736	20180714	UniProt
UniProtKB	A0A1U9X5T9	COI		GO:1902600	GO_REF:0000108	IEA	GO:0004129	P	Cytochrome c oxidase subunit 1	COI	protein	taxon:159736	20180714	GOC
UniProtKB	A0A1U9X5V1	COI		GO:0004129	GO_REF:0000002	IEA	InterPro:IPR000883|InterPro:IPR023616	F	Cytochrome c oxidase subunit 1	COI	protein	taxon:159736	20180714	InterPro
UniProtKB	A0A1U9X5V1	COI		GO:0004129	GO_REF:0000003	IEA	EC:1.9.3.1	F	Cytochrome c oxidase subunit 1	COI	protein	taxon:159736	20180714	UniProt
UniProtKB	A0A1U9X5V1	COI		GO:0005739	GO_REF:0000038	IEA	UniProtKB-KW:KW-0496	C	Cytochrome c oxidase subunit 1	COI	protein	taxon:159736	20180714	UniProt
UniProtKB	A0A1U9X5V1	COI		GO:0005743	GO_REF:0000038	IEA	UniProtKB-KW:KW-0999	C	Cytochrome c oxidase subunit 1	COI	protein	taxon:159736	20180714	UniProt
UniProtKB	A0A1U9X5V1	COI		GO:0005743	GO_REF:0000040	IEA	UniProtKB-SubCell:SL-0168	C	Cytochrome c oxidase subunit 1	COI	protein	taxon:159736	20180714	UniProt
UniProtKB	A0A1U9X5V1	COI		GO:0006119	GO_REF:0000041	IEA	UniPathway:UPA00705	P	Cytochrome c oxidase subunit 1	COI	protein	taxon:159736	20180714	UniProt
UniProtKB	A0A1U9X5V1	COI		GO:0009060	GO_REF:0000002	IEA	InterPro:IPR000883	P	Cytochrome c oxidase subunit 1	COI	protein	taxon:159736	20180714	InterPro
UniProtKB	A0A1U9X5V1	COI		GO:0016020	GO_REF:0000038	IEA	UniProtKB-KW:KW-0472	C	Cytochrome c oxidase subunit 1	COI	protein	taxon:159736	20180714	UniProt
UniProtKB	A0A1U9X5V1	COI		GO:0016021	GO_REF:0000002	IEA	InterPro:IPR000883	C	Cytochrome c oxidase subunit 1	COI	protein	taxon:159736	20180714	InterPro
UniProtKB	A0A1U9X5V1	COI		GO:0016021	GO_REF:0000038	IEA	UniProtKB-KW:KW-0812	C	Cytochrome c oxidase subunit 1	COI	protein	taxon:159736	20180714	UniProt
UniProtKB	A0A1U9X5V1	COI		GO:0016491	GO_REF:0000038	IEA	UniProtKB-KW:KW-0560	F	Cytochrome c oxidase subunit 1	COI	protein	taxon:159736	20180714	UniProt
UniProtKB	A0A1U9X5V1	COI		GO:0020037	GO_REF:0000002	IEA	InterPro:IPR000883	F	Cytochrome c oxidase subunit 1	COI	protein	taxon:159736	20180714	InterPro
UniProtKB	A0A1U9X5V1	COI		GO:0022900	GO_REF:0000108	IEA	GO:0004129	P	Cytochrome c oxidase subunit 1	COI	protein	taxon:159736	20180714	GOC
UniProtKB	A0A1U9X5V1	COI		GO:0046872	GO_REF:0000038	IEA	UniProtKB-KW:KW-0479	F	Cytochrome c oxidase subunit 1	COI	protein	taxon:159736	20180714	UniProt
UniProtKB	A0A1U9X5V1	COI		GO:0055114	GO_REF:0000002	IEA	InterPro:IPR000883|InterPro:IPR023616|InterPro:IPR036927	P	Cytochrome c oxidase subunit 1	COI	protein	taxon:159736	20180714	InterPro
UniProtKB	A0A1U9X5V1	COI		GO:0055114	GO_REF:0000038	IEA	UniProtKB-KW:KW-0249	P	Cytochrome c oxidase subunit 1	COI	protein	taxon:159736	20180714	UniProt
UniProtKB	A0A1U9X5V1	COI		GO:0055114	GO_REF:0000038	IEA	UniProtKB-KW:KW-0560	P	Cytochrome c oxidase subunit 1	COI	protein	taxon:159736	20180714	UniProt
UniProtKB	A0A1U9X5V1	COI		GO:0070469	GO_REF:0000038	IEA	UniProtKB-KW:KW-0679	C	Cytochrome c oxidase subunit 1	COI	protein	taxon:159736	20180714	UniProt
UniProtKB	A0A1U9X5V1	COI		GO:1902600	GO_REF:0000108	IEA	GO:0004129	P	Cytochrome c oxidase subunit 1	COI	protein	taxon:159736	20180714	GOC
UniProtKB	A0A218N7N0	COX1		GO:0004129	GO_REF:0000002	IEA	InterPro:IPR000883|InterPro:IPR023615|InterPro:IPR023616	F	Cytochrome c oxidase subunit 1	COX1	protein	taxon:79674	20180714	InterPro
UniProtKB	A0A218N7N0	COX1		GO:0004129	GO_REF:0000003	IEA	EC:1.9.3.1	F	Cytochrome c oxidase subunit 1	COX1	protein	taxon:79674	20180714	UniProt
UniProtKB	A0A218N7N0	COX1		GO:0005739	GO_REF:0000038	IEA	UniProtKB-KW:KW-0496	C	Cytochrome c oxidase subunit 1	COX1	protein	taxon:79674	20180714	UniProt
UniProtKB	A0A218N7N0	COX1		GO:0005743	GO_REF:0000038	IEA	UniProtKB-KW:KW-0999	C	Cytochrome c oxidase subunit 1	COX1	protein	taxon:79674	20180714	UniProt
UniProtKB	A0A218N7N0	COX1		GO:0005743	GO_REF:0000040	IEA	UniProtKB-SubCell:SL-0168	C	Cytochrome c oxidase subunit 1	COX1	protein	taxon:79674	20180714	UniProt
UniProtKB	A0A218N7N0	COX1		GO:0006119	GO_REF:0000041	IEA	UniPathway:UPA00705	P	Cytochrome c oxidase subunit 1	COX1	protein	taxon:79674	20180714	UniProt
UniProtKB	A0A218N7N0	COX1		GO:0009060	GO_REF:0000002	IEA	InterPro:IPR000883	P	Cytochrome c oxidase subunit 1	COX1	protein	taxon:79674	20180714	InterPro
UniProtKB	A0A218N7N0	COX1		GO:0016020	GO_REF:0000038	IEA	UniProtKB-KW:KW-0472	C	Cytochrome c oxidase subunit 1	COX1	protein	taxon:79674	20180714	UniProt
UniProtKB	A0A218N7N0	COX1		GO:0016021	GO_REF:0000002	IEA	InterPro:IPR000883	C	Cytochrome c oxidase subunit 1	COX1	protein	taxon:79674	20180714	InterPro
UniProtKB	A0A218N7N0	COX1		GO:0016021	GO_REF:0000038	IEA	UniProtKB-KW:KW-0812	C	Cytochrome c oxidase subunit 1	COX1	protein	taxon:79674	20180714	UniProt
UniProtKB	A0A218N7N0	COX1		GO:0016491	GO_REF:0000038	IEA	UniProtKB-KW:KW-0560	F	Cytochrome c oxidase subunit 1	COX1	protein	taxon:79674	20180714	UniProt
UniProtKB	A0A218N7N0	COX1		GO:0020037	GO_REF:0000002	IEA	InterPro:IPR000883	F	Cytochrome c oxidase subunit 1	COX1	protein	taxon:79674	20180714	InterPro
UniProtKB	A0A218N7N0	COX1		GO:0022900	GO_REF:0000108	IEA	GO:0004129	P	Cytochrome c oxidase subunit 1	COX1	protein	taxon:79674	20180714	GOC
UniProtKB	A0A218N7N0	COX1		GO:0045277	GO_REF:0000002	IEA	InterPro:IPR033944	C	Cytochrome c oxidase subunit 1	COX1	protein	taxon:79674	20180714	InterPro
UniProtKB	A0A218N7N0	COX1		GO:0046872	GO_REF:0000038	IEA	UniProtKB-KW:KW-0479	F	Cytochrome c oxidase subunit 1	COX1	protein	taxon:79674	20180714	UniProt
UniProtKB	A0A218N7N0	COX1		GO:0055114	GO_REF:0000002	IEA	InterPro:IPR000883|InterPro:IPR023615|InterPro:IPR023616|InterPro:IPR036927	P	Cytochrome c oxidase subunit 1	COX1	protein	taxon:79674	20180714	InterPro
UniProtKB	A0A218N7N0	COX1		GO:0055114	GO_REF:0000038	IEA	UniProtKB-KW:KW-0249	P	Cytochrome c oxidase subunit 1	COX1	protein	taxon:79674	20180714	UniProt
UniProtKB	A0A218N7N0	COX1		GO:0055114	GO_REF:0000038	IEA	UniProtKB-KW:KW-0560	P	Cytochrome c oxidase subunit 1	COX1	protein	taxon:79674	20180714	UniProt
UniProtKB	A0A218N7N0	COX1		GO:0070469	GO_REF:0000038	IEA	UniProtKB-KW:KW-0679	C	Cytochrome c oxidase subunit 1	COX1	protein	taxon:79674	20180714	UniProt
UniProtKB	A0A218N7N0	COX1		GO:1902600	GO_REF:0000108	IEA	GO:0004129	P	Cytochrome c oxidase subunit 1	COX1	protein	taxon:79674	20180714	GOC
UniProtKB	A0A218N7P1	COX1		GO:0004129	GO_REF:0000002	IEA	InterPro:IPR000883|InterPro:IPR023615|InterPro:IPR023616	F	Cytochrome c oxidase subunit 1	COX1	protein	taxon:79674	20180714	InterPro
UniProtKB	A0A218N7P1	COX1		GO:0004129	GO_REF:0000003	IEA	EC:1.9.3.1	F	Cytochrome c oxidase subunit 1	COX1	protein	taxon:79674	20180714	UniProt
UniProtKB	A0A218N7P1	COX1		GO:0005739	GO_REF:0000038	IEA	UniProtKB-KW:KW-0496	C	Cytochrome c oxidase subunit 1	COX1	protein	taxon:79674	20180714	UniProt
UniProtKB	A0A218N7P1	COX1		GO:0005743	GO_REF:0000038	IEA	UniProtKB-KW:KW-0999	C	Cytochrome c oxidase subunit 1	COX1	protein	taxon:79674	20180714	UniProt
UniProtKB	A0A218N7P1	COX1		GO:0005743	GO_REF:0000040	IEA	UniProtKB-SubCell:SL-0168	C	Cytochrome c oxidase subunit 1	COX1	protein	taxon:79674	20180714	UniProt
UniProtKB	A0A218N7P1	COX1		GO:0006119	GO_REF:0000041	IEA	UniPathway:UPA00705	P	Cytochrome c oxidase subunit 1	COX1	protein	taxon:79674	20180714	UniProt
UniProtKB	A0A218N7P1	COX1		GO:0009060	GO_REF:0000002	IEA	InterPro:IPR000883	P	Cytochrome c oxidase subunit 1	COX1	protein	taxon:79674	20180714	InterPro
UniProtKB	A0A218N7P1	COX1		GO:0016020	GO_REF:0000038	IEA	UniProtKB-KW:KW-0472	C	Cytochrome c oxidase subunit 1	COX1	protein	taxon:79674	20180714	UniProt
UniProtKB	A0A218N7P1	COX1		GO:0016021	GO_REF:0000002	IEA	InterPro:IPR000883	C	Cytochrome c oxidase subunit 1	COX1	protein	taxon:79674	20180714	InterPro
UniProtKB	A0A218N7P1	COX1		GO:0016021	GO_REF:0000038	IEA	UniProtKB-KW:KW-0812	C	Cytochrome c oxidase subunit 1	COX1	protein	taxon:79674	20180714	UniProt
UniProtKB	A0A218N7P1	COX1		GO:0016491	GO_REF:0000038	IEA	UniProtKB-KW:KW-0560	F	Cytochrome c oxidase subunit 1	COX1	protein	taxon:79674	20180714	UniProt
UniProtKB	A0A218N7P1	COX1		GO:0020037	GO_REF:0000002	IEA	InterPro:IPR000883	F	Cytochrome c oxidase subunit 1	COX1	protein	taxon:79674	20180714	InterPro
UniProtKB	A0A218N7P1	COX1		GO:0022900	GO_REF:0000108	IEA	GO:0004129	P	Cytochrome c oxidase subunit 1	COX1	protein	taxon:79674	20180714	GOC
UniProtKB	A0A218N7P1	COX1		GO:0045277	GO_REF:0000002	IEA	InterPro:IPR033944	C	Cytochrome c oxidase subunit 1	COX1	protein	taxon:79674	20180714	InterPro
UniProtKB	A0A218N7P1	COX1		GO:0046872	GO_REF:0000038	IEA	UniProtKB-KW:KW-0479	F	Cytochrome c oxidase subunit 1	COX1	protein	taxon:79674	20180714	UniProt
UniProtKB	A0A218N7P1	COX1		GO:0055114	GO_REF:0000002	IEA	InterPro:IPR000883|InterPro:IPR023615|InterPro:IPR023616|InterPro:IPR036927	P	Cytochrome c oxidase subunit 1	COX1	protein	taxon:79674	20180714	InterPro
UniProtKB	A0A218N7P1	COX1		GO:0055114	GO_REF:0000038	IEA	UniProtKB-KW:KW-0249	P	Cytochrome c oxidase subunit 1	COX1	protein	taxon:79674	20180714	UniProt
UniProtKB	A0A218N7P1	COX1		GO:0055114	GO_REF:0000038	IEA	UniProtKB-KW:KW-0560	P	Cytochrome c oxidase subunit 1	COX1	protein	taxon:79674	20180714	UniProt
UniProtKB	A0A218N7P1	COX1		GO:0070469	GO_REF:0000038	IEA	UniProtKB-KW:KW-0679	C	Cytochrome c oxidase subunit 1	COX1	protein	taxon:79674	20180714	UniProt
UniProtKB	A0A218N7P1	COX1		GO:1902600	GO_REF:0000108	IEA	GO:0004129	P	Cytochrome c oxidase subunit 1	COX1	protein	taxon:79674	20180714	GOC
UniProtKB	A0A218N7Q3	COX1		GO:0004129	GO_REF:0000002	IEA	InterPro:IPR000883|InterPro:IPR023615|InterPro:IPR023616	F	Cytochrome c oxidase subunit 1	COX1	protein	taxon:79674	20180714	InterPro
UniProtKB	A0A218N7Q3	COX1		GO:0004129	GO_REF:0000003	IEA	EC:1.9.3.1	F	Cytochrome c oxidase subunit 1	COX1	protein	taxon:79674	20180714	UniProt
UniProtKB	A0A218N7Q3	COX1		GO:0005739	GO_REF:0000038	IEA	UniProtKB-KW:KW-0496	C	Cytochrome c oxidase subunit 1	COX1	protein	taxon:79674	20180714	UniProt
UniProtKB	A0A218N7Q3	COX1		GO:0005743	GO_REF:0000038	IEA	UniProtKB-KW:KW-0999	C	Cytochrome c oxidase subunit 1	COX1	protein	taxon:79674	20180714	UniProt
UniProtKB	A0A218N7Q3	COX1		GO:0005743	GO_REF:0000040	IEA	UniProtKB-SubCell:SL-0168	C	Cytochrome c oxidase subunit 1	COX1	protein	taxon:79674	20180714	UniProt
UniProtKB	A0A218N7Q3	COX1		GO:0006119	GO_REF:0000041	IEA	UniPathway:UPA00705	P	Cytochrome c oxidase subunit 1	COX1	protein	taxon:79674	20180714	UniProt
UniProtKB	A0A218N7Q3	COX1		GO:0009060	GO_REF:0000002	IEA	InterPro:IPR000883	P	Cytochrome c oxidase subunit 1	COX1	protein	taxon:79674	20180714	InterPro
UniProtKB	A0A218N7Q3	COX1		GO:0016020	GO_REF:0000038	IEA	UniProtKB-KW:KW-0472	C	Cytochrome c oxidase subunit 1	COX1	protein	taxon:79674	20180714	UniProt
UniProtKB	A0A218N7Q3	COX1		GO:0016021	GO_REF:0000002	IEA	InterPro:IPR000883	C	Cytochrome c oxidase subunit 1	COX1	protein	taxon:79674	20180714	InterPro
UniProtKB	A0A218N7Q3	COX1		GO:0016021	GO_REF:0000038	IEA	UniProtKB-KW:KW-0812	C	Cytochrome c oxidase subunit 1	COX1	protein	taxon:79674	20180714	UniProt
UniProtKB	A0A218N7Q3	COX1		GO:0016491	GO_REF:0000038	IEA	UniProtKB-KW:KW-0560	F	Cytochrome c oxidase subunit 1	COX1	protein	taxon:79674	20180714	UniProt
UniProtKB	A0A218N7Q3	COX1		GO:0020037	GO_REF:0000002	IEA	InterPro:IPR000883	F	Cytochrome c oxidase subunit 1	COX1	protein	taxon:79674	20180714	InterPro
UniProtKB	A0A218N7Q3	COX1		GO:0022900	GO_REF:0000108	IEA	GO:0004129	P	Cytochrome c oxidase subunit 1	COX1	protein	taxon:79674	20180714	GOC
UniProtKB	A0A218N7Q3	COX1		GO:0045277	GO_REF:0000002	IEA	InterPro:IPR033944	C	Cytochrome c oxidase subunit 1	COX1	protein	taxon:79674	20180714	InterPro
UniProtKB	A0A218N7Q3	COX1		GO:0046872	GO_REF:0000038	IEA	UniProtKB-KW:KW-0479	F	Cytochrome c oxidase subunit 1	COX1	protein	taxon:79674	20180714	UniProt
UniProtKB	A0A218N7Q3	COX1		GO:0055114	GO_REF:0000002	IEA	InterPro:IPR000883|InterPro:IPR023615|InterPro:IPR023616|InterPro:IPR036927	P	Cytochrome c oxidase subunit 1	COX1	protein	taxon:79674	20180714	InterPro
UniProtKB	A0A218N7Q3	COX1		GO:0055114	GO_REF:0000038	IEA	UniProtKB-KW:KW-0249	P	Cytochrome c oxidase subunit 1	COX1	protein	taxon:79674	20180714	UniProt
UniProtKB	A0A218N7Q3	COX1		GO:0055114	GO_REF:0000038	IEA	UniProtKB-KW:KW-0560	P	Cytochrome c oxidase subunit 1	COX1	protein	taxon:79674	20180714	UniProt
UniProtKB	A0A218N7Q3	COX1		GO:0070469	GO_REF:0000038	IEA	UniProtKB-KW:KW-0679	C	Cytochrome c oxidase subunit 1	COX1	protein	taxon:79674	20180714	UniProt
UniProtKB	A0A218N7Q3	COX1		GO:1902600	GO_REF:0000108	IEA	GO:0004129	P	Cytochrome c oxidase subunit 1	COX1	protein	taxon:79674	20180714	GOC
UniProtKB	A0A218N7R0	COX1		GO:0004129	GO_REF:0000002	IEA	InterPro:IPR000883|InterPro:IPR023615|InterPro:IPR023616	F	Cytochrome c oxidase subunit 1	COX1	protein	taxon:79674	20180714	InterPro
UniProtKB	A0A218N7R0	COX1		GO:0004129	GO_REF:0000003	IEA	EC:1.9.3.1	F	Cytochrome c oxidase subunit 1	COX1	protein	taxon:79674	20180714	UniProt
UniProtKB	A0A218N7R0	COX1		GO:0005739	GO_REF:0000038	IEA	UniProtKB-KW:KW-0496	C	Cytochrome c oxidase subunit 1	COX1	protein	taxon:79674	20180714	UniProt
UniProtKB	A0A218N7R0	COX1		GO:0005743	GO_REF:0000038	IEA	UniProtKB-KW:KW-0999	C	Cytochrome c oxidase subunit 1	COX1	protein	taxon:79674	20180714	UniProt
UniProtKB	A0A218N7R0	COX1		GO:0005743	GO_REF:0000040	IEA	UniProtKB-SubCell:SL-0168	C	Cytochrome c oxidase subunit 1	COX1	protein	taxon:79674	20180714	UniProt
UniProtKB	A0A218N7R0	COX1		GO:0006119	GO_REF:0000041	IEA	UniPathway:UPA00705	P	Cytochrome c oxidase subunit 1	COX1	protein	taxon:79674	20180714	UniProt
UniProtKB	A0A218N7R0	COX1		GO:0009060	GO_REF:0000002	IEA	InterPro:IPR000883	P	Cytochrome c oxidase subunit 1	COX1	protein	taxon:79674	20180714	InterPro
UniProtKB	A0A218N7R0	COX1		GO:0016020	GO_REF:0000038	IEA	UniProtKB-KW:KW-0472	C	Cytochrome c oxidase subunit 1	COX1	protein	taxon:79674	20180714	UniProt
UniProtKB	A0A218N7R0	COX1		GO:0016021	GO_REF:0000002	IEA	InterPro:IPR000883	C	Cytochrome c oxidase subunit 1	COX1	protein	taxon:79674	20180714	InterPro
UniProtKB	A0A218N7R0	COX1		GO:0016021	GO_REF:0000038	IEA	UniProtKB-KW:KW-0812	C	Cytochrome c oxidase subunit 1	COX1	protein	taxon:79674	20180714	UniProt
UniProtKB	A0A218N7R0	COX1		GO:0016491	GO_REF:0000038	IEA	UniProtKB-KW:KW-0560	F	Cytochrome c oxidase subunit 1	COX1	protein	taxon:79674	20180714	UniProt
UniProtKB	A0A218N7R0	COX1		GO:0020037	GO_REF:0000002	IEA	InterPro:IPR000883	F	Cytochrome c oxidase subunit 1	COX1	protein	taxon:79674	20180714	InterPro
UniProtKB	A0A218N7R0	COX1		GO:0022900	GO_REF:0000108	IEA	GO:0004129	P	Cytochrome c oxidase subunit 1	COX1	protein	taxon:79674	20180714	GOC
UniProtKB	A0A218N7R0	COX1		GO:0045277	GO_REF:0000002	IEA	InterPro:IPR033944	C	Cytochrome c oxidase subunit 1	COX1	protein	taxon:79674	20180714	InterPro
UniProtKB	A0A218N7R0	COX1		GO:0046872	GO_REF:0000038	IEA	UniProtKB-KW:KW-0479	F	Cytochrome c oxidase subunit 1	COX1	protein	taxon:79674	20180714	UniProt
UniProtKB	A0A218N7R0	COX1		GO:0055114	GO_REF:0000002	IEA	InterPro:IPR000883|InterPro:IPR023615|InterPro:IPR023616|InterPro:IPR036927	P	Cytochrome c oxidase subunit 1	COX1	protein	taxon:79674	20180714	InterPro
UniProtKB	A0A218N7R0	COX1		GO:0055114	GO_REF:0000038	IEA	UniProtKB-KW:KW-0249	P	Cytochrome c oxidase subunit 1	COX1	protein	taxon:79674	20180714	UniProt
UniProtKB	A0A218N7R0	COX1		GO:0055114	GO_REF:0000038	IEA	UniProtKB-KW:KW-0560	P	Cytochrome c oxidase subunit 1	COX1	protein	taxon:79674	20180714	UniProt
UniProtKB	A0A218N7R0	COX1		GO:0070469	GO_REF:0000038	IEA	UniProtKB-KW:KW-0679	C	Cytochrome c oxidase subunit 1	COX1	protein	taxon:79674	20180714	UniProt
UniProtKB	A0A218N7R0	COX1		GO:1902600	GO_REF:0000108	IEA	GO:0004129	P	Cytochrome c oxidase subunit 1	COX1	protein	taxon:79674	20180714	GOC
UniProtKB	A0A218N7S0	COX1		GO:0004129	GO_REF:0000002	IEA	InterPro:IPR000883|InterPro:IPR023615|InterPro:IPR023616	F	Cytochrome c oxidase subunit 1	COX1	protein	taxon:79674	20180714	InterPro
UniProtKB	A0A218N7S0	COX1		GO:0004129	GO_REF:0000003	IEA	EC:1.9.3.1	F	Cytochrome c oxidase subunit 1	COX1	protein	taxon:79674	20180714	UniProt
UniProtKB	A0A218N7S0	COX1		GO:0005739	GO_REF:0000038	IEA	UniProtKB-KW:KW-0496	C	Cytochrome c oxidase subunit 1	COX1	protein	taxon:79674	20180714	UniProt
UniProtKB	A0A218N7S0	COX1		GO:0005743	GO_REF:0000038	IEA	UniProtKB-KW:KW-0999	C	Cytochrome c oxidase subunit 1	COX1	protein	taxon:79674	20180714	UniProt
UniProtKB	A0A218N7S0	COX1		GO:0005743	GO_REF:0000040	IEA	UniProtKB-SubCell:SL-0168	C	Cytochrome c oxidase subunit 1	COX1	protein	taxon:79674	20180714	UniProt
UniProtKB	A0A218N7S0	COX1		GO:0006119	GO_REF:0000041	IEA	UniPathway:UPA00705	P	Cytochrome c oxidase subunit 1	COX1	protein	taxon:79674	20180714	UniProt
UniProtKB	A0A218N7S0	COX1		GO:0009060	GO_REF:0000002	IEA	InterPro:IPR000883	P	Cytochrome c oxidase subunit 1	COX1	protein	taxon:79674	20180714	InterPro
UniProtKB	A0A218N7S0	COX1		GO:0016020	GO_REF:0000038	IEA	UniProtKB-KW:KW-0472	C	Cytochrome c oxidase subunit 1	COX1	protein	taxon:79674	20180714	UniProt
UniProtKB	A0A218N7S0	COX1		GO:0016021	GO_REF:0000002	IEA	InterPro:IPR000883	C	Cytochrome c oxidase subunit 1	COX1	protein	taxon:79674	20180714	InterPro
UniProtKB	A0A218N7S0	COX1		GO:0016021	GO_REF:0000038	IEA	UniProtKB-KW:KW-0812	C	Cytochrome c oxidase subunit 1	COX1	protein	taxon:79674	20180714	UniProt
UniProtKB	A0A218N7S0	COX1		GO:0016491	GO_REF:0000038	IEA	UniProtKB-KW:KW-0560	F	Cytochrome c oxidase subunit 1	COX1	protein	taxon:79674	20180714	UniProt
UniProtKB	A0A218N7S0	COX1		GO:0020037	GO_REF:0000002	IEA	InterPro:IPR000883	F	Cytochrome c oxidase subunit 1	COX1	protein	taxon:79674	20180714	InterPro
UniProtKB	A0A218N7S0	COX1		GO:0022900	GO_REF:0000108	IEA	GO:0004129	P	Cytochrome c oxidase subunit 1	COX1	protein	taxon:79674	20180714	GOC
UniProtKB	A0A218N7S0	COX1		GO:0045277	GO_REF:0000002	IEA	InterPro:IPR033944	C	Cytochrome c oxidase subunit 1	COX1	protein	taxon:79674	20180714	InterPro
UniProtKB	A0A218N7S0	COX1		GO:0046872	GO_REF:0000038	IEA	UniProtKB-KW:KW-0479	F	Cytochrome c oxidase subunit 1	COX1	protein	taxon:79674	20180714	UniProt
UniProtKB	A0A218N7S0	COX1		GO:0055114	GO_REF:0000002	IEA	InterPro:IPR000883|InterPro:IPR023615|InterPro:IPR023616|InterPro:IPR036927	P	Cytochrome c oxidase subunit 1	COX1	protein	taxon:79674	20180714	InterPro
UniProtKB	A0A218N7S0	COX1		GO:0055114	GO_REF:0000038	IEA	UniProtKB-KW:KW-0249	P	Cytochrome c oxidase subunit 1	COX1	protein	taxon:79674	20180714	UniProt
UniProtKB	A0A218N7S0	COX1		GO:0055114	GO_REF:0000038	IEA	UniProtKB-KW:KW-0560	P	Cytochrome c oxidase subunit 1	COX1	protein	taxon:79674	20180714	UniProt
UniProtKB	A0A218N7S0	COX1		GO:0070469	GO_REF:0000038	IEA	UniProtKB-KW:KW-0679	C	Cytochrome c oxidase subunit 1	COX1	protein	taxon:79674	20180714	UniProt
UniProtKB	A0A218N7S0	COX1		GO:1902600	GO_REF:0000108	IEA	GO:0004129	P	Cytochrome c oxidase subunit 1	COX1	protein	taxon:79674	20180714	GOC
UniProtKB	A0A218N7S8	COX1		GO:0004129	GO_REF:0000002	IEA	InterPro:IPR000883|InterPro:IPR023615|InterPro:IPR023616	F	Cytochrome c oxidase subunit 1	COX1	protein	taxon:79674	20180714	InterPro
UniProtKB	A0A218N7S8	COX1		GO:0004129	GO_REF:0000003	IEA	EC:1.9.3.1	F	Cytochrome c oxidase subunit 1	COX1	protein	taxon:79674	20180714	UniProt
UniProtKB	A0A218N7S8	COX1		GO:0005739	GO_REF:0000038	IEA	UniProtKB-KW:KW-0496	C	Cytochrome c oxidase subunit 1	COX1	protein	taxon:79674	20180714	UniProt
UniProtKB	A0A218N7S8	COX1		GO:0005743	GO_REF:0000038	IEA	UniProtKB-KW:KW-0999	C	Cytochrome c oxidase subunit 1	COX1	protein	taxon:79674	20180714	UniProt
UniProtKB	A0A218N7S8	COX1		GO:0005743	GO_REF:0000040	IEA	UniProtKB-SubCell:SL-0168	C	Cytochrome c oxidase subunit 1	COX1	protein	taxon:79674	20180714	UniProt
UniProtKB	A0A218N7S8	COX1		GO:0006119	GO_REF:0000041	IEA	UniPathway:UPA00705	P	Cytochrome c oxidase subunit 1	COX1	protein	taxon:79674	20180714	UniProt
UniProtKB	A0A218N7S8	COX1		GO:0009060	GO_REF:0000002	IEA	InterPro:IPR000883	P	Cytochrome c oxidase subunit 1	COX1	protein	taxon:79674	20180714	InterPro
UniProtKB	A0A218N7S8	COX1		GO:0016020	GO_REF:0000038	IEA	UniProtKB-KW:KW-0472	C	Cytochrome c oxidase subunit 1	COX1	protein	taxon:79674	20180714	UniProt
UniProtKB	A0A218N7S8	COX1		GO:0016021	GO_REF:0000002	IEA	InterPro:IPR000883	C	Cytochrome c oxidase subunit 1	COX1	protein	taxon:79674	20180714	InterPro
UniProtKB	A0A218N7S8	COX1		GO:0016021	GO_REF:0000038	IEA	UniProtKB-KW:KW-0812	C	Cytochrome c oxidase subunit 1	COX1	protein	taxon:79674	20180714	UniProt
UniProtKB	A0A218N7S8	COX1		GO:0016491	GO_REF:0000038	IEA	UniProtKB-KW:KW-0560	F	Cytochrome c oxidase subunit 1	COX1	protein	taxon:79674	20180714	UniProt
UniProtKB	A0A218N7S8	COX1		GO:0020037	GO_REF:0000002	IEA	InterPro:IPR000883	F	Cytochrome c oxidase subunit 1	COX1	protein	taxon:79674	20180714	InterPro
UniProtKB	A0A218N7S8	COX1		GO:0022900	GO_REF:0000108	IEA	GO:0004129	P	Cytochrome c oxidase subunit 1	COX1	protein	taxon:79674	20180714	GOC
UniProtKB	A0A218N7S8	COX1		GO:0045277	GO_REF:0000002	IEA	InterPro:IPR033944	C	Cytochrome c oxidase subunit 1	COX1	protein	taxon:79674	20180714	InterPro
UniProtKB	A0A218N7S8	COX1		GO:0046872	GO_REF:0000038	IEA	UniProtKB-KW:KW-0479	F	Cytochrome c oxidase subunit 1	COX1	protein	taxon:79674	20180714	UniProt
UniProtKB	A0A218N7S8	COX1		GO:0055114	GO_REF:0000002	IEA	InterPro:IPR000883|InterPro:IPR023615|InterPro:IPR023616|InterPro:IPR036927	P	Cytochrome c oxidase subunit 1	COX1	protein	taxon:79674	20180714	InterPro
UniProtKB	A0A218N7S8	COX1		GO:0055114	GO_REF:0000038	IEA	UniProtKB-KW:KW-0249	P	Cytochrome c oxidase subunit 1	COX1	protein	taxon:79674	20180714	UniProt
UniProtKB	A0A218N7S8	COX1		GO:0055114	GO_REF:0000038	IEA	UniProtKB-KW:KW-0560	P	Cytochrome c oxidase subunit 1	COX1	protein	taxon:79674	20180714	UniProt
UniProtKB	A0A218N7S8	COX1		GO:0070469	GO_REF:0000038	IEA	UniProtKB-KW:KW-0679	C	Cytochrome c oxidase subunit 1	COX1	protein	taxon:79674	20180714	UniProt
UniProtKB	A0A218N7S8	COX1		GO:1902600	GO_REF:0000108	IEA	GO:0004129	P	Cytochrome c oxidase subunit 1	COX1	protein	taxon:79674	20180714	GOC
UniProtKB	A0A220NLA7	A0A220NLA7		GO:0000166	GO_REF:0000038	IEA	UniProtKB-KW:KW-0547	F	Phosphotransferase		protein	taxon:159736	20180714	UniProt
UniProtKB	A0A220NLA7	A0A220NLA7		GO:0001678	GO_REF:0000002	IEA	InterPro:IPR001312	P	Phosphotransferase		protein	taxon:159736	20180714	InterPro
UniProtKB	A0A220NLA7	A0A220NLA7		GO:0004396	GO_REF:0000002	IEA	InterPro:IPR001312|InterPro:IPR019807	F	Phosphotransferase		protein	taxon:159736	20180714	InterPro
UniProtKB	A0A220NLA7	A0A220NLA7		GO:0004396	GO_REF:0000104	IEA	UniRule:UR000120812	F	Phosphotransferase		protein	taxon:159736	20180714	UniProt
UniProtKB	A0A220NLA7	A0A220NLA7		GO:0005524	GO_REF:0000002	IEA	InterPro:IPR001312|InterPro:IPR019807|InterPro:IPR022672|InterPro:IPR022673	F	Phosphotransferase		protein	taxon:159736	20180714	InterPro
UniProtKB	A0A220NLA7	A0A220NLA7		GO:0005524	GO_REF:0000038	IEA	UniProtKB-KW:KW-0067	F	Phosphotransferase		protein	taxon:159736	20180714	UniProt
UniProtKB	A0A220NLA7	A0A220NLA7		GO:0005524	GO_REF:0000104	IEA	UniRule:UR000120812	F	Phosphotransferase		protein	taxon:159736	20180714	UniProt
UniProtKB	A0A220NLA7	A0A220NLA7		GO:0005536	GO_REF:0000002	IEA	InterPro:IPR001312	F	Phosphotransferase		protein	taxon:159736	20180714	InterPro
UniProtKB	A0A220NLA7	A0A220NLA7		GO:0005623	GO_REF:0000108	IEA	GO:0001678	C	Phosphotransferase		protein	taxon:159736	20180714	GOC
UniProtKB	A0A220NLA7	A0A220NLA7		GO:0005975	GO_REF:0000002	IEA	InterPro:IPR001312|InterPro:IPR022672|InterPro:IPR022673	P	Phosphotransferase		protein	taxon:159736	20180714	InterPro
UniProtKB	A0A220NLA7	A0A220NLA7		GO:0006096	GO_REF:0000002	IEA	InterPro:IPR019807	P	Phosphotransferase		protein	taxon:159736	20180714	InterPro
UniProtKB	A0A220NLA7	A0A220NLA7		GO:0006096	GO_REF:0000038	IEA	UniProtKB-KW:KW-0324	P	Phosphotransferase		protein	taxon:159736	20180714	UniProt
UniProtKB	A0A220NLA7	A0A220NLA7		GO:0016301	GO_REF:0000038	IEA	UniProtKB-KW:KW-0418	F	Phosphotransferase		protein	taxon:159736	20180714	UniProt
UniProtKB	A0A220NLA7	A0A220NLA7		GO:0016310	GO_REF:0000038	IEA	UniProtKB-KW:KW-0418	P	Phosphotransferase		protein	taxon:159736	20180714	UniProt
UniProtKB	A0A220NLA7	A0A220NLA7		GO:0016740	GO_REF:0000038	IEA	UniProtKB-KW:KW-0808	F	Phosphotransferase		protein	taxon:159736	20180714	UniProt
UniProtKB	A0A220NLA7	A0A220NLA7		GO:0016773	GO_REF:0000002	IEA	InterPro:IPR022672|InterPro:IPR022673	F	Phosphotransferase		protein	taxon:159736	20180714	InterPro
UniProtKB	A0A220NLA7	A0A220NLA7		GO:0046835	GO_REF:0000108	IEA	GO:0004396	P	Phosphotransferase		protein	taxon:159736	20180714	GOC
UniProtKB	A0A220QLI0	A0A220QLI0		GO:0042302	GO_REF:0000002	IEA	InterPro:IPR000618	F	Chitin-binding protein		protein	taxon:159736	20180714	InterPro
UniProtKB	A0A220QLI0	A0A220QLI0		GO:0042302	GO_REF:0000038	IEA	UniProtKB-KW:KW-0193	F	Chitin-binding protein		protein	taxon:159736	20180714	UniProt
UniProtKB	A0A220QLI0	A0A220QLI0		GO:0042302	GO_REF:0000104	IEA	UniRule:UR000415155	F	Chitin-binding protein		protein	taxon:159736	20180714	UniProt
UniProtKB	A0A220QLI3	A0A220QLI3		GO:0042302	GO_REF:0000002	IEA	InterPro:IPR000618	F	Chitin-binding protein		protein	taxon:159736	20180714	InterPro
UniProtKB	A0A220QLI3	A0A220QLI3		GO:0042302	GO_REF:0000038	IEA	UniProtKB-KW:KW-0193	F	Chitin-binding protein		protein	taxon:159736	20180714	UniProt
UniProtKB	A0A220QLI3	A0A220QLI3		GO:0042302	GO_REF:0000104	IEA	UniRule:UR000415155	F	Chitin-binding protein		protein	taxon:159736	20180714	UniProt
UniProtKB	A0A220XHZ4	A0A220XHZ4		GO:0030246	GO_REF:0000038	IEA	UniProtKB-KW:KW-0430	F	C-type lectin		protein	taxon:159736	20180714	UniProt
UniProtKB	A0A221I015	A0A221I015		GO:0002755	GO_REF:0000002	IEA	InterPro:IPR017281	P	Myeloid differentiation primary response protein MyD88		protein	taxon:159736	20180714	InterPro
UniProtKB	A0A221I015	A0A221I015		GO:0007165	GO_REF:0000002	IEA	InterPro:IPR000157|InterPro:IPR000488	P	Myeloid differentiation primary response protein MyD88		protein	taxon:159736	20180714	InterPro
UniProtKB	A0A221I015	A0A221I015		GO:0043123	GO_REF:0000002	IEA	InterPro:IPR017281	P	Myeloid differentiation primary response protein MyD88		protein	taxon:159736	20180714	InterPro
UniProtKB	A0A221I015	A0A221I015		GO:0070976	GO_REF:0000002	IEA	InterPro:IPR017281	F	Myeloid differentiation primary response protein MyD88		protein	taxon:159736	20180714	InterPro
UniProtKB	A0A221I021	A0A221I021		GO:0004672	GO_REF:0000002	IEA	InterPro:IPR000719	F	Interleukin 1 receptor associated kinase 4		protein	taxon:159736	20180714	InterPro
UniProtKB	A0A221I021	A0A221I021		GO:0005524	GO_REF:0000002	IEA	InterPro:IPR000719	F	Interleukin 1 receptor associated kinase 4		protein	taxon:159736	20180714	InterPro
UniProtKB	A0A221I021	A0A221I021		GO:0006468	GO_REF:0000002	IEA	InterPro:IPR000719	P	Interleukin 1 receptor associated kinase 4		protein	taxon:159736	20180714	InterPro
UniProtKB	A0A221I021	A0A221I021		GO:0016301	GO_REF:0000038	IEA	UniProtKB-KW:KW-0418	F	Interleukin 1 receptor associated kinase 4		protein	taxon:159736	20180714	UniProt
UniProtKB	A0A221I021	A0A221I021		GO:0016310	GO_REF:0000038	IEA	UniProtKB-KW:KW-0418	P	Interleukin 1 receptor associated kinase 4		protein	taxon:159736	20180714	UniProt
UniProtKB	A0A221I024	A0A221I024		GO:0007165	GO_REF:0000002	IEA	InterPro:IPR012227	P	TNF receptor associated factor 6		protein	taxon:159736	20180714	InterPro
UniProtKB	A0A221I024	A0A221I024		GO:0008270	GO_REF:0000002	IEA	InterPro:IPR001293|InterPro:IPR012227	F	TNF receptor associated factor 6		protein	taxon:159736	20180714	InterPro
UniProtKB	A0A221I024	A0A221I024		GO:0042981	GO_REF:0000002	IEA	InterPro:IPR012227	P	TNF receptor associated factor 6		protein	taxon:159736	20180714	InterPro
UniProtKB	A0A221I024	A0A221I024		GO:0046872	GO_REF:0000038	IEA	UniProtKB-KW:KW-0479	F	TNF receptor associated factor 6		protein	taxon:159736	20180714	UniProt
UniProtKB	A0A221I025	A0A221I025		GO:0000165	GO_REF:0000108	IEA	GO:0004707	P	Mitogen-activated protein kinase		protein	taxon:159736	20180714	GOC
UniProtKB	A0A221I025	A0A221I025		GO:0000166	GO_REF:0000038	IEA	UniProtKB-KW:KW-0547	F	Mitogen-activated protein kinase		protein	taxon:159736	20180714	UniProt
UniProtKB	A0A221I025	A0A221I025		GO:0004672	GO_REF:0000002	IEA	InterPro:IPR000719	F	Mitogen-activated protein kinase		protein	taxon:159736	20180714	InterPro
UniProtKB	A0A221I025	A0A221I025		GO:0004674	GO_REF:0000038	IEA	UniProtKB-KW:KW-0723	F	Mitogen-activated protein kinase		protein	taxon:159736	20180714	UniProt
UniProtKB	A0A221I025	A0A221I025		GO:0004707	GO_REF:0000002	IEA	InterPro:IPR003527|InterPro:IPR008352	F	Mitogen-activated protein kinase		protein	taxon:159736	20180714	InterPro
UniProtKB	A0A221I025	A0A221I025		GO:0004707	GO_REF:0000003	IEA	EC:2.7.11.24	F	Mitogen-activated protein kinase		protein	taxon:159736	20180714	UniProt
UniProtKB	A0A221I025	A0A221I025		GO:0005524	GO_REF:0000002	IEA	InterPro:IPR000719|InterPro:IPR003527|InterPro:IPR008352|InterPro:IPR017441	F	Mitogen-activated protein kinase		protein	taxon:159736	20180714	InterPro
UniProtKB	A0A221I025	A0A221I025		GO:0005524	GO_REF:0000038	IEA	UniProtKB-KW:KW-0067	F	Mitogen-activated protein kinase		protein	taxon:159736	20180714	UniProt
UniProtKB	A0A221I025	A0A221I025		GO:0005622	GO_REF:0000108	IEA	GO:0000165	C	Mitogen-activated protein kinase		protein	taxon:159736	20180714	GOC
UniProtKB	A0A221I025	A0A221I025		GO:0006468	GO_REF:0000002	IEA	InterPro:IPR000719|InterPro:IPR003527|InterPro:IPR008352	P	Mitogen-activated protein kinase		protein	taxon:159736	20180714	InterPro
UniProtKB	A0A221I025	A0A221I025		GO:0016301	GO_REF:0000038	IEA	UniProtKB-KW:KW-0418	F	Mitogen-activated protein kinase		protein	taxon:159736	20180714	UniProt
UniProtKB	A0A221I025	A0A221I025		GO:0016310	GO_REF:0000038	IEA	UniProtKB-KW:KW-0418	P	Mitogen-activated protein kinase		protein	taxon:159736	20180714	UniProt
UniProtKB	A0A221I025	A0A221I025		GO:0016740	GO_REF:0000038	IEA	UniProtKB-KW:KW-0808	F	Mitogen-activated protein kinase		protein	taxon:159736	20180714	UniProt
UniProtKB	A0A221I026	A0A221I026		GO:0003723	GO_REF:0000002	IEA	InterPro:IPR006116	F	Interleukin enhancer-binding factor 2-like protein		protein	taxon:159736	20180714	InterPro
UniProtKB	A0A221I026	A0A221I026		GO:0005524	GO_REF:0000002	IEA	InterPro:IPR006116	F	Interleukin enhancer-binding factor 2-like protein		protein	taxon:159736	20180714	InterPro
UniProtKB	A0A221I026	A0A221I026		GO:0006955	GO_REF:0000002	IEA	InterPro:IPR006116	P	Interleukin enhancer-binding factor 2-like protein		protein	taxon:159736	20180714	InterPro
UniProtKB	A0A221I026	A0A221I026		GO:0016740	GO_REF:0000002	IEA	InterPro:IPR006116	F	Interleukin enhancer-binding factor 2-like protein		protein	taxon:159736	20180714	InterPro
UniProtKB	A0A221I027	A0A221I027		GO:0004672	GO_REF:0000002	IEA	InterPro:IPR000719	F	Mitogen-activated protein kinase kinase 7		protein	taxon:159736	20180714	InterPro
UniProtKB	A0A221I027	A0A221I027		GO:0005524	GO_REF:0000002	IEA	InterPro:IPR000719|InterPro:IPR017441	F	Mitogen-activated protein kinase kinase 7		protein	taxon:159736	20180714	InterPro
UniProtKB	A0A221I027	A0A221I027		GO:0006468	GO_REF:0000002	IEA	InterPro:IPR000719	P	Mitogen-activated protein kinase kinase 7		protein	taxon:159736	20180714	InterPro
UniProtKB	A0A221I027	A0A221I027		GO:0016301	GO_REF:0000038	IEA	UniProtKB-KW:KW-0418	F	Mitogen-activated protein kinase kinase 7		protein	taxon:159736	20180714	UniProt
UniProtKB	A0A221I027	A0A221I027		GO:0016310	GO_REF:0000038	IEA	UniProtKB-KW:KW-0418	P	Mitogen-activated protein kinase kinase 7		protein	taxon:159736	20180714	UniProt
UniProtKB	A0A221I031	A0A221I031		GO:0007165	GO_REF:0000002	IEA	InterPro:IPR000157	P	Toll like receptor 3		protein	taxon:159736	20180714	InterPro
UniProtKB	A0A221I039	A0A221I039		GO:0003677	GO_REF:0000002	IEA	InterPro:IPR002112|InterPro:IPR029823	F	AP-1 transcription factor subunit		protein	taxon:159736	20180714	InterPro
UniProtKB	A0A221I039	A0A221I039		GO:0003700	GO_REF:0000002	IEA	InterPro:IPR002112|InterPro:IPR004827|InterPro:IPR029823	F	AP-1 transcription factor subunit		protein	taxon:159736	20180714	InterPro
UniProtKB	A0A221I039	A0A221I039		GO:0005634	GO_REF:0000002	IEA	InterPro:IPR029823	C	AP-1 transcription factor subunit		protein	taxon:159736	20180714	InterPro
UniProtKB	A0A221I039	A0A221I039		GO:0006355	GO_REF:0000002	IEA	InterPro:IPR002112|InterPro:IPR004827	P	AP-1 transcription factor subunit		protein	taxon:159736	20180714	InterPro
UniProtKB	A0A221I039	A0A221I039		GO:0006357	GO_REF:0000002	IEA	InterPro:IPR029823	P	AP-1 transcription factor subunit		protein	taxon:159736	20180714	InterPro
UniProtKB	A0A240EUV0	GDH		GO:0006520	GO_REF:0000002	IEA	InterPro:IPR006095|InterPro:IPR006096|InterPro:IPR006097	P	Glutamate dehydrogenase	GDH	protein	taxon:79674	20180714	InterPro
UniProtKB	A0A240EUV0	GDH		GO:0016491	GO_REF:0000002	IEA	InterPro:IPR006095|InterPro:IPR006096|InterPro:IPR006097	F	Glutamate dehydrogenase	GDH	protein	taxon:79674	20180714	InterPro
UniProtKB	A0A240EUV0	GDH		GO:0016491	GO_REF:0000038	IEA	UniProtKB-KW:KW-0560	F	Glutamate dehydrogenase	GDH	protein	taxon:79674	20180714	UniProt
UniProtKB	A0A240EUV0	GDH		GO:0016639	GO_REF:0000002	IEA	InterPro:IPR033922	F	Glutamate dehydrogenase	GDH	protein	taxon:79674	20180714	InterPro
UniProtKB	A0A240EUV0	GDH		GO:0055114	GO_REF:0000002	IEA	InterPro:IPR006095|InterPro:IPR006096|InterPro:IPR006097	P	Glutamate dehydrogenase	GDH	protein	taxon:79674	20180714	InterPro
UniProtKB	A0A240EUV0	GDH		GO:0055114	GO_REF:0000038	IEA	UniProtKB-KW:KW-0560	P	Glutamate dehydrogenase	GDH	protein	taxon:79674	20180714	UniProt
UniProtKB	A0A286LLS4	COI		GO:0004129	GO_REF:0000002	IEA	InterPro:IPR000883|InterPro:IPR023616	F	Cytochrome c oxidase subunit 1	COI	protein	taxon:79674	20180714	InterPro
UniProtKB	A0A286LLS4	COI		GO:0004129	GO_REF:0000003	IEA	EC:1.9.3.1	F	Cytochrome c oxidase subunit 1	COI	protein	taxon:79674	20180714	UniProt
UniProtKB	A0A286LLS4	COI		GO:0005739	GO_REF:0000038	IEA	UniProtKB-KW:KW-0496	C	Cytochrome c oxidase subunit 1	COI	protein	taxon:79674	20180714	UniProt
UniProtKB	A0A286LLS4	COI		GO:0005743	GO_REF:0000038	IEA	UniProtKB-KW:KW-0999	C	Cytochrome c oxidase subunit 1	COI	protein	taxon:79674	20180714	UniProt
UniProtKB	A0A286LLS4	COI		GO:0005743	GO_REF:0000040	IEA	UniProtKB-SubCell:SL-0168	C	Cytochrome c oxidase subunit 1	COI	protein	taxon:79674	20180714	UniProt
UniProtKB	A0A286LLS4	COI		GO:0006119	GO_REF:0000041	IEA	UniPathway:UPA00705	P	Cytochrome c oxidase subunit 1	COI	protein	taxon:79674	20180714	UniProt
UniProtKB	A0A286LLS4	COI		GO:0009060	GO_REF:0000002	IEA	InterPro:IPR000883	P	Cytochrome c oxidase subunit 1	COI	protein	taxon:79674	20180714	InterPro
UniProtKB	A0A286LLS4	COI		GO:0016020	GO_REF:0000038	IEA	UniProtKB-KW:KW-0472	C	Cytochrome c oxidase subunit 1	COI	protein	taxon:79674	20180714	UniProt
UniProtKB	A0A286LLS4	COI		GO:0016021	GO_REF:0000002	IEA	InterPro:IPR000883	C	Cytochrome c oxidase subunit 1	COI	protein	taxon:79674	20180714	InterPro
UniProtKB	A0A286LLS4	COI		GO:0016021	GO_REF:0000038	IEA	UniProtKB-KW:KW-0812	C	Cytochrome c oxidase subunit 1	COI	protein	taxon:79674	20180714	UniProt
UniProtKB	A0A286LLS4	COI		GO:0016491	GO_REF:0000038	IEA	UniProtKB-KW:KW-0560	F	Cytochrome c oxidase subunit 1	COI	protein	taxon:79674	20180714	UniProt
UniProtKB	A0A286LLS4	COI		GO:0020037	GO_REF:0000002	IEA	InterPro:IPR000883	F	Cytochrome c oxidase subunit 1	COI	protein	taxon:79674	20180714	InterPro
UniProtKB	A0A286LLS4	COI		GO:0022900	GO_REF:0000108	IEA	GO:0004129	P	Cytochrome c oxidase subunit 1	COI	protein	taxon:79674	20180714	GOC
UniProtKB	A0A286LLS4	COI		GO:0046872	GO_REF:0000038	IEA	UniProtKB-KW:KW-0479	F	Cytochrome c oxidase subunit 1	COI	protein	taxon:79674	20180714	UniProt
UniProtKB	A0A286LLS4	COI		GO:0055114	GO_REF:0000002	IEA	InterPro:IPR000883|InterPro:IPR023616|InterPro:IPR036927	P	Cytochrome c oxidase subunit 1	COI	protein	taxon:79674	20180714	InterPro
UniProtKB	A0A286LLS4	COI		GO:0055114	GO_REF:0000038	IEA	UniProtKB-KW:KW-0249	P	Cytochrome c oxidase subunit 1	COI	protein	taxon:79674	20180714	UniProt
UniProtKB	A0A286LLS4	COI		GO:0055114	GO_REF:0000038	IEA	UniProtKB-KW:KW-0560	P	Cytochrome c oxidase subunit 1	COI	protein	taxon:79674	20180714	UniProt
UniProtKB	A0A286LLS4	COI		GO:0070469	GO_REF:0000038	IEA	UniProtKB-KW:KW-0679	C	Cytochrome c oxidase subunit 1	COI	protein	taxon:79674	20180714	UniProt
UniProtKB	A0A286LLS4	COI		GO:1902600	GO_REF:0000108	IEA	GO:0004129	P	Cytochrome c oxidase subunit 1	COI	protein	taxon:79674	20180714	GOC
UniProtKB	A0A286LLS5	COI		GO:0004129	GO_REF:0000002	IEA	InterPro:IPR000883|InterPro:IPR023616	F	Cytochrome c oxidase subunit 1	COI	protein	taxon:79674	20180714	InterPro
UniProtKB	A0A286LLS5	COI		GO:0004129	GO_REF:0000003	IEA	EC:1.9.3.1	F	Cytochrome c oxidase subunit 1	COI	protein	taxon:79674	20180714	UniProt
UniProtKB	A0A286LLS5	COI		GO:0005739	GO_REF:0000038	IEA	UniProtKB-KW:KW-0496	C	Cytochrome c oxidase subunit 1	COI	protein	taxon:79674	20180714	UniProt
UniProtKB	A0A286LLS5	COI		GO:0005743	GO_REF:0000038	IEA	UniProtKB-KW:KW-0999	C	Cytochrome c oxidase subunit 1	COI	protein	taxon:79674	20180714	UniProt
UniProtKB	A0A286LLS5	COI		GO:0005743	GO_REF:0000040	IEA	UniProtKB-SubCell:SL-0168	C	Cytochrome c oxidase subunit 1	COI	protein	taxon:79674	20180714	UniProt
UniProtKB	A0A286LLS5	COI		GO:0006119	GO_REF:0000041	IEA	UniPathway:UPA00705	P	Cytochrome c oxidase subunit 1	COI	protein	taxon:79674	20180714	UniProt
UniProtKB	A0A286LLS5	COI		GO:0009060	GO_REF:0000002	IEA	InterPro:IPR000883	P	Cytochrome c oxidase subunit 1	COI	protein	taxon:79674	20180714	InterPro
UniProtKB	A0A286LLS5	COI		GO:0016020	GO_REF:0000038	IEA	UniProtKB-KW:KW-0472	C	Cytochrome c oxidase subunit 1	COI	protein	taxon:79674	20180714	UniProt
UniProtKB	A0A286LLS5	COI		GO:0016021	GO_REF:0000002	IEA	InterPro:IPR000883	C	Cytochrome c oxidase subunit 1	COI	protein	taxon:79674	20180714	InterPro
UniProtKB	A0A286LLS5	COI		GO:0016021	GO_REF:0000038	IEA	UniProtKB-KW:KW-0812	C	Cytochrome c oxidase subunit 1	COI	protein	taxon:79674	20180714	UniProt
UniProtKB	A0A286LLS5	COI		GO:0016491	GO_REF:0000038	IEA	UniProtKB-KW:KW-0560	F	Cytochrome c oxidase subunit 1	COI	protein	taxon:79674	20180714	UniProt
UniProtKB	A0A286LLS5	COI		GO:0020037	GO_REF:0000002	IEA	InterPro:IPR000883	F	Cytochrome c oxidase subunit 1	COI	protein	taxon:79674	20180714	InterPro
UniProtKB	A0A286LLS5	COI		GO:0022900	GO_REF:0000108	IEA	GO:0004129	P	Cytochrome c oxidase subunit 1	COI	protein	taxon:79674	20180714	GOC
UniProtKB	A0A286LLS5	COI		GO:0046872	GO_REF:0000038	IEA	UniProtKB-KW:KW-0479	F	Cytochrome c oxidase subunit 1	COI	protein	taxon:79674	20180714	UniProt
UniProtKB	A0A286LLS5	COI		GO:0055114	GO_REF:0000002	IEA	InterPro:IPR000883|InterPro:IPR023616|InterPro:IPR036927	P	Cytochrome c oxidase subunit 1	COI	protein	taxon:79674	20180714	InterPro
UniProtKB	A0A286LLS5	COI		GO:0055114	GO_REF:0000038	IEA	UniProtKB-KW:KW-0249	P	Cytochrome c oxidase subunit 1	COI	protein	taxon:79674	20180714	UniProt
UniProtKB	A0A286LLS5	COI		GO:0055114	GO_REF:0000038	IEA	UniProtKB-KW:KW-0560	P	Cytochrome c oxidase subunit 1	COI	protein	taxon:79674	20180714	UniProt
UniProtKB	A0A286LLS5	COI		GO:0070469	GO_REF:0000038	IEA	UniProtKB-KW:KW-0679	C	Cytochrome c oxidase subunit 1	COI	protein	taxon:79674	20180714	UniProt
UniProtKB	A0A286LLS5	COI		GO:1902600	GO_REF:0000108	IEA	GO:0004129	P	Cytochrome c oxidase subunit 1	COI	protein	taxon:79674	20180714	GOC
UniProtKB	A0A286PX75	Hc		GO:0008152	GO_REF:0000002	IEA	InterPro:IPR002227	P	Hemocyanin	Hc	protein	taxon:79674	20180714	InterPro
UniProtKB	A0A286PX75	Hc		GO:0016491	GO_REF:0000002	IEA	InterPro:IPR002227	F	Hemocyanin	Hc	protein	taxon:79674	20180714	InterPro
UniProtKB	A0A286PX75	Hc		GO:0046872	GO_REF:0000038	IEA	UniProtKB-KW:KW-0479	F	Hemocyanin	Hc	protein	taxon:79674	20180714	UniProt
UniProtKB	A0A286PX75	Hc		GO:0055114	GO_REF:0000108	IEA	GO:0016491	P	Hemocyanin	Hc	protein	taxon:79674	20180714	GOC
UniProtKB	A0A286QZ04	A0A286QZ04		GO:0003676	GO_REF:0000002	IEA	InterPro:IPR003165|InterPro:IPR036397	F	Argonaute-2		protein	taxon:79674	20180714	InterPro
UniProtKB	A0A286QZ04	A0A286QZ04		GO:0031047	GO_REF:0000038	IEA	UniProtKB-KW:KW-0943	P	Argonaute-2		protein	taxon:79674	20180714	UniProt
UniProtKB	A0A286QZ07	A0A286QZ07		GO:0003676	GO_REF:0000002	IEA	InterPro:IPR003165|InterPro:IPR036397	F	Argonaute-1		protein	taxon:79674	20180714	InterPro
UniProtKB	A0A286QZ07	A0A286QZ07		GO:0031047	GO_REF:0000038	IEA	UniProtKB-KW:KW-0943	P	Argonaute-1		protein	taxon:79674	20180714	UniProt
UniProtKB	A0A286QZ11	A0A286QZ11		GO:0003677	GO_REF:0000002	IEA	InterPro:IPR006935	F	Dicer-2		protein	taxon:79674	20180714	InterPro
UniProtKB	A0A286QZ11	A0A286QZ11		GO:0003723	GO_REF:0000038	IEA	UniProtKB-KW:KW-0694	F	Dicer-2		protein	taxon:79674	20180714	UniProt
UniProtKB	A0A286QZ11	A0A286QZ11		GO:0003723	GO_REF:0000104	IEA	UniRule:UR000415048	F	Dicer-2		protein	taxon:79674	20180714	UniProt
UniProtKB	A0A286QZ11	A0A286QZ11		GO:0004525	GO_REF:0000002	IEA	InterPro:IPR000999|InterPro:IPR036389	F	Dicer-2		protein	taxon:79674	20180714	InterPro
UniProtKB	A0A286QZ11	A0A286QZ11		GO:0005524	GO_REF:0000002	IEA	InterPro:IPR006935	F	Dicer-2		protein	taxon:79674	20180714	InterPro
UniProtKB	A0A286QZ11	A0A286QZ11		GO:0006396	GO_REF:0000002	IEA	InterPro:IPR000999|InterPro:IPR036389	P	Dicer-2		protein	taxon:79674	20180714	InterPro
UniProtKB	A0A286QZ11	A0A286QZ11		GO:0016787	GO_REF:0000002	IEA	InterPro:IPR006935	F	Dicer-2		protein	taxon:79674	20180714	InterPro
UniProtKB	A0A286QZ11	A0A286QZ11		GO:0016891	GO_REF:0000002	IEA	InterPro:IPR005034	F	Dicer-2		protein	taxon:79674	20180714	InterPro
UniProtKB	A0A286QZ11	A0A286QZ11		GO:0031047	GO_REF:0000038	IEA	UniProtKB-KW:KW-0943	P	Dicer-2		protein	taxon:79674	20180714	UniProt
UniProtKB	A0A286QZ11	A0A286QZ11		GO:0090501	GO_REF:0000108	IEA	GO:0004525	P	Dicer-2		protein	taxon:79674	20180714	GOC
UniProtKB	A0A286QZ11	A0A286QZ11		GO:0090502	GO_REF:0000108	IEA	GO:0004525	P	Dicer-2		protein	taxon:79674	20180714	GOC
UniProtKB	A0A286QZ11	A0A286QZ11		GO:0090502	GO_REF:0000108	IEA	GO:0016891	P	Dicer-2		protein	taxon:79674	20180714	GOC
UniProtKB	A0A286QZ13	A0A286QZ13		GO:0016020	GO_REF:0000038	IEA	UniProtKB-KW:KW-0472	C	SID-1		protein	taxon:79674	20180714	UniProt
UniProtKB	A0A286QZ13	A0A286QZ13		GO:0016021	GO_REF:0000002	IEA	InterPro:IPR025958	C	SID-1		protein	taxon:79674	20180714	InterPro
UniProtKB	A0A286QZ13	A0A286QZ13		GO:0016021	GO_REF:0000038	IEA	UniProtKB-KW:KW-0812	C	SID-1		protein	taxon:79674	20180714	UniProt
UniProtKB	A0A286QZ13	A0A286QZ13		GO:0033227	GO_REF:0000002	IEA	InterPro:IPR025958	P	SID-1		protein	taxon:79674	20180714	InterPro
UniProtKB	A0A286QZ13	A0A286QZ13		GO:0051033	GO_REF:0000002	IEA	InterPro:IPR025958	F	SID-1		protein	taxon:79674	20180714	InterPro
UniProtKB	A0A286QZ15	A0A286QZ15		GO:0003723	GO_REF:0000002	IEA	InterPro:IPR011907	F	Dicer-1		protein	taxon:79674	20180714	InterPro
UniProtKB	A0A286QZ15	A0A286QZ15		GO:0003723	GO_REF:0000038	IEA	UniProtKB-KW:KW-0694	F	Dicer-1		protein	taxon:79674	20180714	UniProt
UniProtKB	A0A286QZ15	A0A286QZ15		GO:0003723	GO_REF:0000104	IEA	UniRule:UR000415048	F	Dicer-1		protein	taxon:79674	20180714	UniProt
UniProtKB	A0A286QZ15	A0A286QZ15		GO:0004525	GO_REF:0000002	IEA	InterPro:IPR000999|InterPro:IPR011907|InterPro:IPR036389	F	Dicer-1		protein	taxon:79674	20180714	InterPro
UniProtKB	A0A286QZ15	A0A286QZ15		GO:0006396	GO_REF:0000002	IEA	InterPro:IPR000999|InterPro:IPR036389	P	Dicer-1		protein	taxon:79674	20180714	InterPro
UniProtKB	A0A286QZ15	A0A286QZ15		GO:0016075	GO_REF:0000002	IEA	InterPro:IPR011907	P	Dicer-1		protein	taxon:79674	20180714	InterPro
UniProtKB	A0A286QZ15	A0A286QZ15		GO:0016891	GO_REF:0000002	IEA	InterPro:IPR005034	F	Dicer-1		protein	taxon:79674	20180714	InterPro
UniProtKB	A0A286QZ15	A0A286QZ15		GO:0031047	GO_REF:0000038	IEA	UniProtKB-KW:KW-0943	P	Dicer-1		protein	taxon:79674	20180714	UniProt
UniProtKB	A0A286QZ15	A0A286QZ15		GO:0090501	GO_REF:0000108	IEA	GO:0004525	P	Dicer-1		protein	taxon:79674	20180714	GOC
UniProtKB	A0A286QZ15	A0A286QZ15		GO:0090502	GO_REF:0000108	IEA	GO:0004525	P	Dicer-1		protein	taxon:79674	20180714	GOC
UniProtKB	A0A286QZ15	A0A286QZ15		GO:0090502	GO_REF:0000108	IEA	GO:0016891	P	Dicer-1		protein	taxon:79674	20180714	GOC
UniProtKB	A0A286QZ16	A0A286QZ16		GO:0003676	GO_REF:0000002	IEA	InterPro:IPR003165|InterPro:IPR036397	F	Argonaute-3		protein	taxon:79674	20180714	InterPro
UniProtKB	A0A286QZ16	A0A286QZ16		GO:0031047	GO_REF:0000038	IEA	UniProtKB-KW:KW-0943	P	Argonaute-3		protein	taxon:79674	20180714	UniProt
UniProtKB	A0A2D1CJ69	CP13.2		GO:0042302	GO_REF:0000002	IEA	InterPro:IPR000618	F	Cuticle-like protein	CP13.2	protein	taxon:159736	20180714	InterPro
UniProtKB	A0A2D1CJ69	CP13.2		GO:0042302	GO_REF:0000038	IEA	UniProtKB-KW:KW-0193	F	Cuticle-like protein	CP13.2	protein	taxon:159736	20180714	UniProt
UniProtKB	A0A2D1CJ69	CP13.2		GO:0042302	GO_REF:0000104	IEA	UniRule:UR000415155	F	Cuticle-like protein	CP13.2	protein	taxon:159736	20180714	UniProt
UniProtKB	A0A2D1CJL4	COI		GO:0004129	GO_REF:0000002	IEA	InterPro:IPR000883|InterPro:IPR023616	F	Cytochrome c oxidase subunit 1	COI	protein	taxon:79674	20180714	InterPro
UniProtKB	A0A2D1CJL4	COI		GO:0004129	GO_REF:0000003	IEA	EC:1.9.3.1	F	Cytochrome c oxidase subunit 1	COI	protein	taxon:79674	20180714	UniProt
UniProtKB	A0A2D1CJL4	COI		GO:0005739	GO_REF:0000038	IEA	UniProtKB-KW:KW-0496	C	Cytochrome c oxidase subunit 1	COI	protein	taxon:79674	20180714	UniProt
UniProtKB	A0A2D1CJL4	COI		GO:0005743	GO_REF:0000038	IEA	UniProtKB-KW:KW-0999	C	Cytochrome c oxidase subunit 1	COI	protein	taxon:79674	20180714	UniProt
UniProtKB	A0A2D1CJL4	COI		GO:0005743	GO_REF:0000040	IEA	UniProtKB-SubCell:SL-0168	C	Cytochrome c oxidase subunit 1	COI	protein	taxon:79674	20180714	UniProt
UniProtKB	A0A2D1CJL4	COI		GO:0006119	GO_REF:0000041	IEA	UniPathway:UPA00705	P	Cytochrome c oxidase subunit 1	COI	protein	taxon:79674	20180714	UniProt
UniProtKB	A0A2D1CJL4	COI		GO:0009060	GO_REF:0000002	IEA	InterPro:IPR000883	P	Cytochrome c oxidase subunit 1	COI	protein	taxon:79674	20180714	InterPro
UniProtKB	A0A2D1CJL4	COI		GO:0016020	GO_REF:0000038	IEA	UniProtKB-KW:KW-0472	C	Cytochrome c oxidase subunit 1	COI	protein	taxon:79674	20180714	UniProt
UniProtKB	A0A2D1CJL4	COI		GO:0016021	GO_REF:0000002	IEA	InterPro:IPR000883	C	Cytochrome c oxidase subunit 1	COI	protein	taxon:79674	20180714	InterPro
[truncated: 11,286 more rows]
